# Supplementary material
Source: Research Square preprint supplement (doi:10.21203/rs.3.rs-8628781/v1)
Supplement: Supplementary file 1 [file 193a797f2d760161e0f177b3.xlsx]

## Sheet: Supplementary Table 1
Supplementary Table 1: The list of tomato lines used in this study, their categories, and whole-genome sequencing statistics for the BAM files associated with each line.
Tomato Line	Category	Raw total sequences	Reads unmapped	Reads MQ0	Total length	Bases mapped	bases mapped (cigar)	mismatches	error rate	Average quality	insert size average	insert size standard deviation	inward oriented pairs	outward oriented pairs	pairs with other orientation	pairs on different chromosomes	percentage of properly paired reads (%)
LA1930	Wild Accession	193801510	7296546	1747070	29070226500	27975744600	26772094652	1343366405	0.0501779	35.8	298.9	60	90630910	513433	103189	1325696	93.8
LA1938	Wild Accession	144546782	5536789	1177215	21682017300	20851498950	19949933202	1035946874	0.0519273	35.8	295.7	58.5	67625418	358563	68714	947502	93.8
LA2582	Wild Accession	158881084	5824776	1317951	23832162600	22958446200	21951955164	1107941842	0.0504712	35.6	345.6	74.2	73198333	406408	181110	2114975	90.9
LA4440	Prebreeding line	147183816	928289	322288	22077572400	21938329050	21765814972	238053465	0.010937	35.7	279.1	51.7	72679747	211701	15980	143338	98.9
LA4442	Prebreeding line	150044288	375541	244699	22506643200	22450312050	22268856529	145559573	0.00653646	35.9	320.2	79.3	73798464	263946	273997	428265	93.8
Monte Verde	Breeding line, Round	167505562	457837	303763	25125834300	25057158750	24906386178	132908258	0.00533631	35.9	350.7	68.4	82571323	177994	161625	524985	96.5
NC 1 CELBR	Breeding line, Round	236372428	637403	188773	35455864200	35360253750	35252322050	169755587	0.00481544	35.7	298.6	52.8	117489960	94342	29652	145230	99.3
NC 1 CS	Breeding line, Round	191501698	539914	146830	28725254700	28644267600	28562141027	114125345	0.00399569	35.9	297	52.8	95187751	83964	23702	111338	99.3
NC 1 GEM	Breeding line, Round	216654594	670380	243140	32498189100	32397632100	32256804426	131966837	0.00409113	36	270	51.9	107211459	571046	20547	110770	99.2
NC 109	Breeding line, Round	197604642	528196	156456	29640696300	29561466900	29464965722	134621176	0.00456886	35.9	298.7	51.9	98230263	80017	18268	127169	99.3
NC 123S	Breeding line, Round	166650454	17183266	446681	24997568100	22420078200	22193848416	178815946	0.00805701	35.8	344.4	67.4	73644612	172216	111188	585706	87.1
NC 132S	Breeding line, Round	169708490	17813481	271039	25456273500	22784251350	22654718292	126320931	0.00557592	35.6	343.6	66.5	75038482	144690	82666	509387	87.4
NC 13G	Breeding line, Round (CGH)	189923286	25065333	340068	28488492900	24728692950	24571583230	142412069	0.0057958	35.6	347.8	65.4	80401199	143963	147484	1422040	83.3
NC 2 GEM	Breeding line, Round	204324394	1088585	173876	30648659100	30485371350	30336757503	206086316	0.00679329	35.9	299.8	52.7	101194528	87781	28808	193951	98.9
NC 2 rinEC	Breeding line, Round	165799586	479974	300293	24869937900	24797941800	24651837771	152224925	0.00617499	35.5	350	66.1	81941702	114706	79898	416773	97.1
NC 233253	Breeding line, Round	203790158	976291	525977	30568523700	30422080050	30059997766	258437770	0.0085974	36	321	78.9	99687464	385576	411032	744450	93.6
NC 236041	Breeding line, Round	184459714	1236185	366525	27668957100	27483529350	27164219267	242253040	0.00891809	36	320.6	79.7	90320630	249145	184946	680230	93.3
NC 236042	Breeding line, Round	145213938	1058401	263470	21782090700	21623330550	21394761175	183142228	0.00856014	36	317.6	78.3	71166386	183735	116485	483300	94.4
NC 236238	Breeding line, Round	145574982	1451143	262892	21836247300	21618575850	21407380717	178013194	0.00831551	36	308.4	76.4	71219386	188980	89905	428978	95.3
NC 236505	Breeding line, Round	149002706	1598309	324267	22350405900	22110659550	21851933827	198885454	0.0091015	36	320	79.7	72487300	259484	254007	558832	93.1
NC 236521	Breeding line, Round	171255676	1497028	327597	25688351400	25463797200	25172457129	215062738	0.00854357	36.1	318.6	80.3	83668408	236627	175896	642371	93.1
NC 3 GEM	Breeding line, Round	249914432	684987	166970	37487164800	37384416750	37273572463	156646189	0.00420261	35.8	292.5	51.7	124166877	146455	22900	174473	99.4
NC 6 GEM	Breeding line, Round	227907904	2280597	187959	34186185600	33844096050	33679815130	212743751	0.00631665	35.9	299.5	53.1	112278137	104996	33042	232443	98.4
NC 7 GEM	Breeding line, Round	179752414	470988	206644	26962862100	26892213900	26781217112	113193027	0.00422658	36	282.9	54.4	89164715	305961	14469	88985	99.3
NC 84173	Breeding line, Round	167308644	508456	405048	25096296600	25020028200	24845083178	173793646	0.00699509	35.5	354.2	66.8	82552144	165739	166491	404707	96.2
NC 9BS	Breeding line, Round	206695542	1564272	244218	31004331300	30769690500	30667726965	132751968	0.00432872	35.9	301.8	54.4	102198619	116810	24584	141517	98.8
NC 1 Grape	Breeding line, Grape	172072424	10495313	442655	25810863600	24236566650	24017274541	212702340	0.00885622	35.6	351.7	68.5	79571263	194690	153592	688193	90.6
NC 2 Grape	Breeding line, Grape	165937256	555292	285466	24890588400	24807294600	24633992051	158172491	0.0064209	35.9	342.1	67.4	79948891	194210	179149	2265722	94.9
NC 3 Grape	Breeding line, Grape	159885240	832682	401355	23982786000	23857883700	23663690759	217496170	0.00919113	35.5	344.6	67.8	78410902	175358	110414	688593	96.7
NC 4 Grape	Breeding line, Grape	168782006	703388	179237	25317300900	25211792700	25078340941	160554854	0.00640213	36.1	282.2	52.2	83642504	175024	15818	115052	99.1
NC 5 Grape	Breeding line, Grape	168910662	586871	217565	25336599300	25248568650	25113360793	151370218	0.00602748	36	276.3	53	83643861	312901	18029	104580	99.2
NC 6 Grape	Breeding line, Grape	146552926	545645	149191	21982938900	21901092150	21787699473	130541362	0.00599152	36.1	280.9	53.1	72596677	224568	14279	96283	99.1
NC 25P	Breeding line, Plum	198273940	538332	99559	29741091000	29660341200	29561115572	112378872	0.00380158	36.1	277	51.2	98412538	280076	11592	90550	99.4
NC 30P	Breeding line, Plum	161284160	44990896	305102	24192624000	17443989600	17298369910	112402530	0.00649787	35.6	350	68.5	57311638	104080	59941	406961	69.6
NC 946	Breeding line, Plum	174263366	585190	265219	26139504900	26051726400	25844676816	171810131	0.00664779	36	317.3	79.1	85920593	241878	213274	382821	94.6
NC EBR-6	Breeding line, Plum	205714352	644265	154441	30857152800	30760513050	30671026155	135224910	0.00440888	35.8	295.1	52.7	102183216	101269	23622	129055	99.3
NC EBR-7	Breeding line, Plum	175472316	354225	195558	26320847400	26267713650	26117430390	134696632	0.00515735	36	305.3	75.3	86818811	230912	95398	345747	96.7
NC EBR-8	Breeding line, Plum	162771958	34490890	327234	24415793700	19242160200	19105833897	125894261	0.00658931	35.5	345.9	67.6	63386907	133125	81122	349237	76.8
NC 9 GEM	Breeding line, Round, Black pineapple	163600518	465820	138394	24540077700	24470204700	24387173739	83914151	0.00344091	36	271.9	52	81116309	311728	12286	70751	99.3
NC 10 GEM	Breeding line, Round, Purple	215186986	515958	147163	32278047900	32200654200	32102891859	121960943	0.00379906	36.1	286.7	53.8	106928408	200772	19638	116121	99.3
NC 161L	Breeding line, Round, Pink	238250204	595239	360261	35737530600	35648244750	35520199936	153218007	0.00431355	35.8	292.4	52.4	118428257	157948	21001	134246	99.4
NC 1Y	Breeding line, Round, Tangerine	172966164	216269	239580	25944924600	25912484250	25741563985	128102412	0.00497648	36	318.1	78.2	85497017	242991	246773	329927	94.9
NC 2Y	Breeding line, Round, Tangerine	162760954	351878	225917	24414143100	24361361400	24201810896	132316009	0.0054672	36	314.5	77.5	80387157	231285	202382	317161	95.5
Mtn. Gold	Breeding line, Round, Tangerine	199171532	435328	292485	29875729800	29810430600	29605109484	162017055	0.00547261	36	313.5	78.7	98263570	309480	289367	421347	95.1
Anahu	Landrace	181855790	260818	240480	27278368500	27239245800	27108611683	153833550	0.00567471	35.6	304.3	71.6	89717984	223126	124861	673118	97.5
Healani	Landrace	143150942	295578	174459	21472641300	21428304600	21321750551	95746345	0.00449055	35.9	307.7	72	70571154	185032	82649	532390	97.4
Kewalo	Landrace	190071224	444716	249709	28510683600	28443976200	28340578973	146473113	0.00516832	35.8	290.1	51.6	94485972	134990	10860	121332	99.5
Mogeor	Landrace	198011518	1150063	323219	29701727700	29529218250	29200862563	293211618	0.0100412	35.9	320.4	81.6	96840605	312655	299468	826569	92.6
Moneymaker	Landrace	149020196	221412	175073	22353029400	22319817600	22243548424	101165934	0.0045481	35.9	289.2	51.4	74161347	118301	6112	77522	99.6
Pearl Harbor	Landrace	180048412	254215	280634	27007261800	26969129550	26871728146	117148126	0.00435953	35.8	312.3	58.3	89214196	166653	42244	429327	99.1
Platense	Landrace	160463152	743914	422670	24069472800	23957885700	23757645072	181554979	0.00764196	35.9	301	55.7	79208036	194640	35779	283611	98.8
	TSW-07
Thessaloniki	Landrace	151989910	213913	231937	22798486500	22766399550	22675360204	121713044	0.00536763	35.8	280.3	52	75605608	194809	7651	49272	99.7
TSW-07	Landrace	198951598	6896998	433790	29842739700	28808190000	28676461368	161359155	0.00562688	35.8	303.8	56	95630943	170221	20499	142738	96.2
NCEBR6-TgA	Transgenic (BC2, NC EBR-6)	192533922	409059	270254	28880088300	28818729450	28620618922	157838454	0.00551485	36	311.5	78.1	95054121	301573	162427	470542	95.4
NC109-TgA	Transgenic (BC2, NC 109)	156838198	747548	271538	23525729700	23413597500	23162075036	185228497	0.00799706	36	311	84.2	76762451	449792	117411	599401	93.8
MM-GFP	Transgenic (Moneymaker)	142429610	258820	191067	21364441500	21325618500	21177408485	112980941	0.00533497	36	316.7	79.2	70409205	185554	146121	289250	94.9
MM-TgeneA	Transgenic (Moneymaker)	185824748	316758	400576	27873712200	27826198500	27626077493	201992852	0.00731167	35.9	256.3	55.4	91672865	853070	18637	166009	99.3
MM-TgeneB	Transgenic (Moneymaker)	165835794	245338	238819	24875369100	24838568400	24711967904	131230800	0.00531041	35.9	262.1	48.4	82134414	459235	13896	149524	99.4
MM-TgeneE	Transgenic (Moneymaker)	180508410	379769	358343	27076261500	27019296150	26771483166	139793552	0.00522173	35.9	297.9	79.5	86928038	967707	187738	1886402	94.5
MM-TgeneF	Transgenic (Moneymaker)	205723818	283818	430476	30858572700	30816000000	30603693452	209874832	0.00685783	35.9	263.9	53.4	101702125	826704	18290	121910	99.4

## Sheet: Supplementary Table 2
Supplementary Table 2: Physical map of the structural variants identified in 57 cultivated tomatoes in this study, sorted by SV type and physical map.
Chromosome	Position	Name	Alt_BND_Chr	Alt_BND_Pos	SV_Type	REF	ALT	nHet	nHomAlt	nHomRef
SL4.0ch00	89833	MantaBND:83:0:1:0:0:0:0	SL4.0CH04	13495691	BND	C	CTT]SL4.0CH04:13495691]	2	2	56
SL4.0ch00	90311	MantaBND:58:0:1:0:1:0:0	SL4.0CH04	13495358	BND	T	T]SL4.0CH04:13495358]	1	0	59
SL4.0ch00	1067498	MantaBND:1710:0:1:0:3:0:0	SL4.0CH00	5216712	BND	C	C]SL4.0CH00:5216712]	1	1	58
SL4.0ch00	1315491	MantaBND:2272:0:1:0:0:0:1	SL4.0CH04	13591866	BND	T	[SL4.0CH04:13591866[CT	1	7	52
SL4.0ch00	1781086	MantaBND:123:32:43:0:0:0:1	SL4.0CH06	10092806	BND	T	T[SL4.0CH06:10092806[	1	0	59
SL4.0ch00	4149568	MantaBND:5363:0:1:0:0:0:0	SL4.0CH01	37682806	BND	C	C]SL4.0CH01:37682806]	1	0	59
SL4.0ch00	4273516	MantaBND:4652:0:1:0:3:0:1	SL4.0CH00	5327632	BND	A	A]SL4.0CH00:5327632]	13	0	47
SL4.0ch00	5216671	MantaBND:1710:0:1:0:3:0:1	SL4.0CH00	1067539	BND	C	C]SL4.0CH00:1067539]	1	1	58
SL4.0ch00	5327611	MantaBND:4652:0:1:0:3:0:0	SL4.0CH00	4273537	BND	T	T]SL4.0CH00:4273537]	13	0	47
SL4.0ch00	6305559	MantaBND:6340:0:1:0:0:0:0	SL4.0CH01	82795350	BND	C	C]SL4.0CH01:82795350]	13	0	47
SL4.0ch00	7479302	MantaBND:6968:0:2:0:0:0:0	SL4.0CH10	25295280	BND	A	A]SL4.0CH10:25295280]	56	0	4
SL4.0ch01	462623	MantaBND:10030:0:1:0:0:0:0	SL4.0CH02	23176883	BND	T	[SL4.0CH02:23176883[T	1	0	59
SL4.0ch01	462656	MantaBND:10744:0:1:0:0:0:0	SL4.0CH02	23176890	BND	T	[SL4.0CH02:23176890[T	1	0	59
SL4.0ch01	2531368	MantaBND:12469:0:0:1:0:0:0	SL4.0CH01	2531490	BND	T	TCCATGGTTGGTTGCAAAAAGGTTCATGAATTTGGGATTTTAGCTTTTTTTTAGTTA]SL4.0CH01:2531490]	3	41	16
SL4.0ch01	2531369	MantaBND:12469:0:0:4:0:0:1	SL4.0CH01	2531490	BND	T	[SL4.0CH01:2531490[TAT	28	13	19
SL4.0ch01	2531490	MantaBND:12469:0:0:1:0:0:1	SL4.0CH01	2531368	BND	T	TTAACTAAAAAAAAGCTAAAATCCCAAATTCATGAACCTTTTTGCAACCAACCATGG]SL4.0CH01:2531368]	3	41	16
SL4.0ch01	2531490	MantaBND:12469:0:0:4:0:0:0	SL4.0CH01	2531369	BND	T	[SL4.0CH01:2531369[TAT	28	13	19
SL4.0ch01	4311461	MantaBND:143:13929:13930:0:0:0:1	SL4.0CH09	2722437	BND	A	[SL4.0CH09:2722437[A	1	0	59
SL4.0ch01	4313399	MantaBND:14292:0:1:0:0:0:0	SL4.0CH09	2734754	BND	A	AA[SL4.0CH09:2734754[	1	0	59
SL4.0ch01	9574061	MantaBND:18159:0:1:0:0:0:1	SL4.0CH12	1199528	BND	G	[SL4.0CH12:1199528[G,[SL4.0CH12:1199551[G	2	0	50
SL4.0ch01	9574103	MantaBND:20211:0:1:0:0:0:1	SL4.0CH12	1199528	BND	T	[SL4.0CH12:1199528[T,[SL4.0CH12:1199593[T	12	1	46
SL4.0ch01	9574106	MantaBND:21427:0:1:0:0:0:1	SL4.0CH12	1199568	BND	A	[SL4.0CH12:1199568[A,[SL4.0CH12:1199566[A	4	0	52
SL4.0ch01	10764674	MantaBND:19044:0:1:0:0:0:0	SL4.0CH03	14102441	BND	A	[SL4.0CH03:14102441[A	9	0	51
SL4.0ch01	10808777	MantaBND:162:18044:18049:1:0:0:0	SL4.0CH10	11837963	BND	T	T]SL4.0CH10:11837963]	1	0	59
SL4.0ch01	10808777	MantaBND:18464:14:15:0:0:0:1	SL4.0CH10	11837992	BND	T	T]SL4.0CH10:11837992]	1	0	59
SL4.0ch01	10808788	MantaBND:20553:10:11:0:0:0:1	SL4.0CH10	11837958	BND	T	T]SL4.0CH10:11837958]	4	0	56
SL4.0ch01	11214571	MantaBND:21393:1:3:0:0:0:0	SL4.0CH11	47942886	BND	A	A]SL4.0CH11:47942886]	10	0	50
SL4.0ch01	11381408	MantaBND:23472:0:1:0:0:0:0	SL4.0CH05	29870026	BND	G	G]SL4.0CH05:29870026]	1	0	59
SL4.0ch01	11435207	MantaBND:22450:0:1:0:0:0:1	SL4.0CH02	40834717	BND	A	ATCC]SL4.0CH02:40834717]	3	0	57
SL4.0ch01	12688396	MantaBND:32:677:685:0:0:0:0	SL4.0CH08	31875160	BND	A	A[SL4.0CH08:31875160[	1	0	59
SL4.0ch01	12688413	MantaBND:151:11330:11331:0:0:0:0	SL4.0CH08	31875133	BND	T	T[SL4.0CH08:31875133[	1	0	59
SL4.0ch01	14084656	MantaBND:26121:0:1:0:0:0:1	SL4.0CH01	14086765	BND	G	G]SL4.0CH01:14086765]	1	0	59
SL4.0ch01	14086765	MantaBND:26121:0:1:0:0:0:0	SL4.0CH01	14084656	BND	G	G]SL4.0CH01:14084656]	1	0	59
SL4.0ch01	15827241	MantaBND:23645:0:1:0:1:0:1	SL4.0CH02	18287239	BND	C	C[SL4.0CH02:18287239[	1	0	59
SL4.0ch01	17929396	MantaBND:151:18967:18969:0:0:0:0	SL4.0CH11	1688197	BND	C	]SL4.0CH11:1688197]ACTATAGATTTGTCATTCCCTGGGCTTGGCCAAAGACATACCCGGCATACTAAGACTAAGATGAATCATCTCAGTTCCTCAACAGGCCTAGTC	9	0	51
SL4.0ch01	17929771	MantaBND:151:18967:18970:0:0:0:1	SL4.0CH07	20318064	BND	T	TGAAATATACATAGTAAA[SL4.0CH07:20318064[	21	0	39
SL4.0ch01	18063809	MantaBND:151:5111:5125:0:0:0:1	SL4.0CH01	67387151	BND	T	[SL4.0CH01:67387151[T,[SL4.0CH01:67387143[T	2	0	57
SL4.0ch01	18270087	MantaBND:26765:0:1:0:0:0:1	SL4.0CH01	18540436	BND	G	G]SL4.0CH01:18540436]	5	0	55
SL4.0ch01	18540415	MantaBND:26765:0:1:0:0:0:0	SL4.0CH01	18270108	BND	T	T]SL4.0CH01:18270108]	5	0	55
SL4.0ch01	19161714	MantaBND:33173:0:1:0:0:0:0	SL4.0CH10	92835	BND	T	]SL4.0CH10:92835]T	1	0	59
SL4.0ch01	19967170	MantaBND:32401:0:1:0:0:0:1	SL4.0CH07	51533706	BND	G	GA]SL4.0CH07:51533706]	1	0	59
SL4.0ch01	20699754	MantaBND:33531:0:1:0:0:0:1	SL4.0CH01	21318193	BND	A	[SL4.0CH01:21318193[A	1	0	59
SL4.0ch01	21229851	MantaBND:34768:0:1:0:0:0:0	SL4.0CH07	17044517	BND	A	[SL4.0CH07:17044517[A	1	0	59
SL4.0ch01	21318193	MantaBND:33531:0:1:0:0:0:0	SL4.0CH01	20699754	BND	C	[SL4.0CH01:20699754[C	1	0	59
SL4.0ch01	21695442	MantaBND:35326:0:1:0:0:0:0	SL4.0CH01	27625511	BND	A	A]SL4.0CH01:27625511]	10	0	50
SL4.0ch01	21830390	MantaBND:143:19703:19704:0:0:0:1	SL4.0CH10	46294385	BND	T	]SL4.0CH10:46294385]T	1	0	59
SL4.0ch01	21830391	MantaBND:26:17434:17436:0:0:0:1	SL4.0CH10	46294317	BND	A	]SL4.0CH10:46294317]A	2	0	58
SL4.0ch01	21830393	MantaBND:28955:0:1:1:0:0:0	SL4.0CH10	46294441	BND	G	]SL4.0CH10:46294441]G	1	0	59
SL4.0ch01	23906093	MantaBND:162:17506:17508:0:1:0:0	SL4.0CH10	52567821	BND	T	T[SL4.0CH10:52567821[	3	0	57
SL4.0ch01	25918167	MantaBND:40602:0:3:0:2:0:1	SL4.0CH09	57867333	BND	T	[SL4.0CH09:57867333[T	2	1	57
SL4.0ch01	27625508	MantaBND:35326:0:1:0:0:0:1	SL4.0CH01	21695445	BND	A	A]SL4.0CH01:21695445]	10	0	50
SL4.0ch01	27888450	MantaBND:35237:0:1:0:0:0:1	SL4.0CH07	63594884	BND	C	C]SL4.0CH07:63594884]	1	0	59
SL4.0ch01	27966646	MantaBND:35248:0:3:0:2:0:1	SL4.0CH01	30877406	BND	C	C]SL4.0CH01:30877406]	7	0	53
SL4.0ch01	28631418	MantaBND:43653:0:1:0:0:0:1	SL4.0CH04	3524660	BND	A	]SL4.0CH04:3524660]A	1	0	59
SL4.0ch01	30427263	MantaBND:162:9704:9708:0:0:0:0	SL4.0CH06	726926	BND	T	[SL4.0CH06:726926[T	1	0	59
SL4.0ch01	30877399	MantaBND:35248:0:3:0:2:0:0	SL4.0CH01	27966653	BND	T	T]SL4.0CH01:27966653]	7	0	53
SL4.0ch01	32041363	MantaBND:26:1339:1340:0:3:0:1	SL4.0CH11	9858595	BND	A	]SL4.0CH11:9858595]A	5	0	55
SL4.0ch01	32200379	MantaBND:143:9569:9618:0:1:0:1	SL4.0CH06	33623942	BND	A	]SL4.0CH06:33623942]A	1	0	59
SL4.0ch01	32200550	MantaBND:143:9569:9618:1:1:0:1	SL4.0CH06	33624480	BND	T	TTGGGGAACCATCACGTATTCTAACACCA[SL4.0CH06:33624480[	1	0	59
SL4.0ch01	34963060	MantaBND:44790:0:1:0:0:0:0	SL4.0CH04	28474682	BND	C	[SL4.0CH04:28474682[C	1	0	59
SL4.0ch01	36998705	MantaBND:162:18762:18763:0:0:0:1	SL4.0CH06	24841318	BND	T	]SL4.0CH06:24841318]T	5	0	55
SL4.0ch01	37170352	MantaBND:151:2628:2660:0:0:0:0	SL4.0CH08	51281632	BND	G	]SL4.0CH08:51281632]G	1	0	59
SL4.0ch01	37682806	MantaBND:5363:0:1:0:0:0:1	SL4.0CH00	4149568	BND	G	G]SL4.0CH00:4149568]	1	0	59
SL4.0ch01	37933015	MantaBND:44855:0:1:0:0:0:0	SL4.0CH05	19727279	BND	A	A]SL4.0CH05:19727279]	1	0	59
SL4.0ch01	39078906	MantaBND:28023:38:41:0:0:0:1	SL4.0CH09	47349171	BND	A	A]SL4.0CH09:47349171]	1	0	59
SL4.0ch01	39438393	MantaBND:59795:0:1:0:0:0:1	SL4.0CH12	45554425	BND	G	G]SL4.0CH12:45554425]	1	0	59
SL4.0ch01	40281184	MantaBND:162:23736:23784:0:0:0:1	SL4.0CH06	13442501	BND	T	]SL4.0CH06:13442501]T	2	0	58
SL4.0ch01	41086760	MantaBND:47827:0:1:0:0:0:0	SL4.0CH09	65470146	BND	T	T[SL4.0CH09:65470146[	1	0	59
SL4.0ch01	42641600	MantaBND:63554:0:1:0:0:0:1	SL4.0CH04	35376436	BND	A	[SL4.0CH04:35376436[A	3	0	57
SL4.0ch01	46368238	MantaBND:162:14293:14294:0:0:0:1	SL4.0CH06	4578299	BND	G	[SL4.0CH06:4578299[G	1	0	59
SL4.0ch01	49004322	MantaBND:54983:0:1:0:0:0:0	SL4.0CH01	50920408	BND	A	AT]SL4.0CH01:50920408]	1	0	59
SL4.0ch01	50920408	MantaBND:54983:0:1:0:0:0:1	SL4.0CH01	49004322	BND	A	AA]SL4.0CH01:49004322]	1	0	59
SL4.0ch01	52123532	MantaBND:58356:0:1:0:1:0:1	SL4.0CH03	26003872	BND	A	A]SL4.0CH03:26003872]	1	0	59
SL4.0ch01	53557861	MantaBND:77756:1:2:0:0:0:0	SL4.0CH04	63602995	BND	T	]SL4.0CH04:63602995]T	1	0	59
SL4.0ch01	53557873	MantaBND:82278:0:1:0:0:0:0	SL4.0CH04	63602939	BND	T	]SL4.0CH04:63602939]T	2	0	58
SL4.0ch01	53557876	MantaBND:64380:0:1:0:0:0:0	SL4.0CH04	63602986	BND	T	]SL4.0CH04:63602986]T	2	0	58
SL4.0ch01	53561338	MantaBND:64380:1:2:0:0:0:0	SL4.0CH04	63603012	BND	A	AAAA[SL4.0CH04:63603012[	6	2	52
SL4.0ch01	57580727	MantaBND:83005:0:1:0:0:0:0	SL4.0CH03	36282202	BND	T	[SL4.0CH03:36282202[T	1	0	59
SL4.0ch01	59803622	MantaBND:26:7627:7629:0:0:0:0	SL4.0CH01	76183764	BND	C	[SL4.0CH01:76183764[CC	1	0	59
SL4.0ch01	60685856	MantaBND:86792:0:2:0:0:0:0	SL4.0CH10	50263795	BND	T	]SL4.0CH10:50263795]T,]SL4.0CH10:50263796]T,]SL4.0CH10:50263797]T	2	0	56
SL4.0ch01	61141585	MantaBND:83645:0:1:0:0:0:0	SL4.0CH04	59845220	BND	G	]SL4.0CH04:59845220]G	1	0	59
SL4.0ch01	63159967	MantaBND:96175:0:1:0:0:0:1	SL4.0CH05	22235643	BND	T	T[SL4.0CH05:22235643[	1	0	59
SL4.0ch01	63804081	MantaBND:48395:3:4:0:0:0:1	SL4.0CH09	10511312	BND	A	[SL4.0CH09:10511312[A	2	0	58
SL4.0ch01	65699386	MantaBND:99244:0:1:0:0:0:1	SL4.0CH01	66030654	BND	C	C]SL4.0CH01:66030654]	1	0	59
SL4.0ch01	66030605	MantaBND:99244:0:1:0:0:0:0	SL4.0CH01	65699435	BND	A	A]SL4.0CH01:65699435]	1	0	59
SL4.0ch01	67125658	MantaBND:90280:0:2:1:0:0:1	SL4.0CH04	6086883	BND	A	]SL4.0CH04:6086883]AATA	1	0	59
SL4.0ch01	67189470	MantaBND:26:17361:17362:0:2:0:0	SL4.0CH01	89310287	BND	G	[SL4.0CH01:89310287[G	1	0	59
SL4.0ch01	67387143	MantaBND:123:3125:3129:0:0:0:0	SL4.0CH01	18063809	BND	A	[SL4.0CH01:18063809[A	1	0	59
SL4.0ch01	67387151	MantaBND:151:5111:5125:0:0:0:0	SL4.0CH01	18063809	BND	A	[SL4.0CH01:18063809[A	2	0	58
SL4.0ch01	68662286	MantaBND:80049:0:1:0:0:0:0	SL4.0CH07	61397977	BND	A	]SL4.0CH07:61397977]TGTTAAATTAGGTCTTAGGCCTAACTCACACTCCAAAAGCTAGCTTTAACAGTAA	3	0	57
SL4.0ch01	68666462	MantaBND:96214:0:1:0:2:0:1	SL4.0CH07	59709619	BND	T	]SL4.0CH07:59709619]TT	24	0	36
SL4.0ch01	69390314	MantaBND:96604:0:1:0:1:0:0	SL4.0CH06	2392398	BND	A	]SL4.0CH06:2392398]ATGA	10	0	50
SL4.0ch01	70253741	MantaBND:74220:0:1:0:0:0:1	SL4.0CH12	23135678	BND	A	]SL4.0CH12:23135678]A	1	0	59
SL4.0ch01	71035178	MantaBND:94026:0:1:0:1:0:0	SL4.0CH02	26069749	BND	T	]SL4.0CH02:26069749]AT	1	0	59
SL4.0ch01	72778238	MantaBND:95161:0:1:0:1:0:0	SL4.0CH03	4996319	BND	T	T]SL4.0CH03:4996319]	1	0	59
SL4.0ch01	73364304	MantaBND:84466:2:5:0:0:0:0	SL4.0CH05	5029763	BND	A	AGAATAGATTGAAGTGAAGGAACTGTGAACATTGAAACAGCATGCACATTAAACCTG[SL4.0CH05:5029763[	1	0	59
SL4.0ch01	73576847	MantaBND:76635:0:2:0:0:0:0	SL4.0CH10	15560351	BND	C	]SL4.0CH10:15560351]C	1	0	59
SL4.0ch01	73801518	MantaBND:76705:0:2:0:4:0:0	SL4.0CH07	64506190	BND	A	[SL4.0CH07:64506190[A	1	0	59
SL4.0ch01	74172629	MantaBND:101216:0:1:0:0:0:0	SL4.0CH01	90435721	BND	C	[SL4.0CH01:90435721[TTTCGGCCTATTTATATATTTTGATATACGAATGGGATAGCAAAATTACAAATAAAAGAAACTATAACTATAACATTTAATTTGAATTAATAGTTTGTTATTTTATACATGTTC	5	0	55
SL4.0ch01	74768317	MantaBND:101523:0:1:0:0:0:0	SL4.0CH01	74769339	BND	A	A]SL4.0CH01:74769339]	1	4	55
SL4.0ch01	74768321	MantaBND:101523:0:1:1:0:0:1	SL4.0CH01	74769403	BND	A	[SL4.0CH01:74769403[A	2	3	55
SL4.0ch01	74769335	MantaBND:101523:0:1:0:0:0:1	SL4.0CH01	74768321	BND	A	A]SL4.0CH01:74768321]	1	4	55
SL4.0ch01	74769401	MantaBND:101523:0:1:1:0:0:0	SL4.0CH01	74768323	BND	T	[SL4.0CH01:74768323[T	2	3	55
SL4.0ch01	74951909	MantaBND:101468:0:1:0:0:0:0	SL4.0CH09	29481459	BND	T	[SL4.0CH09:29481459[T	2	0	58
SL4.0ch01	75174399	MantaBND:78052:1:3:0:0:0:0	SL4.0CH02	44386061	BND	A	A]SL4.0CH02:44386061]	1	0	59
SL4.0ch01	75174408	MantaBND:97890:0:3:0:0:0:0	SL4.0CH02	44385988	BND	T	T]SL4.0CH02:44385988]	1	0	59
SL4.0ch01	75174446	MantaBND:102786:0:1:0:0:0:0	SL4.0CH02	44386043	BND	A	A]SL4.0CH02:44386043]	1	0	59
SL4.0ch01	76105953	MantaBND:103334:0:1:0:0:0:0	SL4.0CH04	29239573	BND	T	TA[SL4.0CH04:29239573[	1	0	59
SL4.0ch01	76183764	MantaBND:26:7627:7629:0:0:0:1	SL4.0CH01	59803622	BND	T	[SL4.0CH01:59803622[GT	1	0	59
SL4.0ch01	76216102	MantaBND:151:8186:8187:0:0:0:1	SL4.0CH06	38160676	BND	T	]SL4.0CH06:38160676]T	40	0	20
SL4.0ch01	76216250	MantaBND:32:8222:8223:0:1:0:1	SL4.0CH06	38160672	BND	A	A[SL4.0CH06:38160672[	4	0	56
SL4.0ch01	76216349	MantaBND:151:8186:8187:1:0:0:1	SL4.0CH06	38160642	BND	A	A[SL4.0CH06:38160642[	1	0	59
SL4.0ch01	77180641	MantaBND:26:16775:16777:0:0:0:1	SL4.0CH11	16946336	BND	C	]SL4.0CH11:16946336]C	6	0	54
SL4.0ch01	77180642	MantaBND:151:16365:16366:0:0:0:0	SL4.0CH11	16811534	BND	T	]SL4.0CH11:16811534]GT	29	0	31
SL4.0ch01	77310637	MantaBND:104579:0:1:0:0:0:0	SL4.0CH04	52834921	BND	A	A]SL4.0CH04:52834921]	1	0	59
SL4.0ch01	77770595	MantaBND:16280:8:9:0:0:0:0	SL4.0CH04	48714824	BND	T	]SL4.0CH04:48714824]AATCTCCACCT	0	1	59
SL4.0ch01	79211049	MantaBND:106049:0:1:0:0:0:0	SL4.0CH03	2898175	BND	T	T[SL4.0CH03:2898175[	4	0	56
SL4.0ch01	80808610	MantaBND:151:15828:15837:0:0:0:0	SL4.0CH05	35157443	BND	T	TAGGAA[SL4.0CH05:35157443[	16	0	44
SL4.0ch01	80809473	MantaBND:54479:3:4:0:0:0:1	SL4.0CH12	26415788	BND	A	A[SL4.0CH12:26415788[	1	0	59
SL4.0ch01	80809489	MantaBND:26:3293:3367:0:0:0:1	SL4.0CH12	26415795	BND	T	T[SL4.0CH12:26415795[	2	0	58
SL4.0ch01	80809503	MantaBND:31442:1:3:0:0:0:1	SL4.0CH12	26415792	BND	C	C[SL4.0CH12:26415792[	4	0	56
SL4.0ch01	80809520	MantaBND:31442:1:6:0:3:0:0	SL4.0CH03	7209855	BND	T	]SL4.0CH03:7209855]T	32	0	28
SL4.0ch01	80809530	MantaBND:123:10974:10975:0:0:0:1	SL4.0CH12	26415792	BND	T	T[SL4.0CH12:26415792[	1	0	59
SL4.0ch01	80809530	MantaBND:32:1996:2065:0:0:0:1	SL4.0CH12	26415794	BND	T	T[SL4.0CH12:26415794[	1	0	59
SL4.0ch01	81288974	MantaBND:107683:0:1:1:0:0:0	SL4.0CH02	36287522	BND	A	[SL4.0CH02:36287522[A	5	0	55
SL4.0ch01	81364314	MantaBND:89770:0:1:0:0:0:0	SL4.0CH06	36945474	BND	A	AGG[SL4.0CH06:36945474[	1	0	59
SL4.0ch01	82488809	MantaBND:151:12668:12669:0:0:0:0	SL4.0CH05	60098394	BND	A	AC[SL4.0CH05:60098394[	2	0	58
SL4.0ch01	82795348	MantaBND:6340:0:1:0:0:0:1	SL4.0CH00	6305561	BND	G	G]SL4.0CH00:6305561]	13	0	47
SL4.0ch01	84179623	MantaBND:117802:0:1:0:0:0:1	SL4.0CH05	56635755	BND	A	A]SL4.0CH05:56635755]	1	0	59
SL4.0ch01	85352781	MantaBND:85407:0:1:0:2:0:1	SL4.0CH12	65384732	BND	T	]SL4.0CH12:65384732]T	1	0	59
SL4.0ch01	85387101	MantaBND:112743:0:2:0:0:0:0	SL4.0CH03	5010669	BND	T	]SL4.0CH03:5010669]T	1	0	59
SL4.0ch01	85987781	MantaBND:111986:0:1:0:0:0:1	SL4.0CH09	27455366	BND	T	[SL4.0CH09:27455366[T	3	0	57
SL4.0ch01	86051500	MantaBND:93065:0:1:2:1:0:1	SL4.0CH01	86054849	BND	C	[SL4.0CH01:86054849[C	1	3	56
SL4.0ch01	86054840	MantaBND:93065:0:1:2:1:0:0	SL4.0CH01	86051509	BND	A	[SL4.0CH01:86051509[A	1	3	56
SL4.0ch01	86743417	MantaBND:143:18635:18636:0:0:0:0	SL4.0CH09	4131968	BND	A	[SL4.0CH09:4131968[A	1	0	59
SL4.0ch01	86973383	MantaBND:113169:0:2:0:0:0:1	SL4.0CH06	3790137	BND	G	[SL4.0CH06:3790137[G	7	0	53
SL4.0ch01	87469761	MantaBND:143:10182:10437:0:0:0:0	SL4.0CH06	342686	BND	T	]SL4.0CH06:342686]T	7	0	53
SL4.0ch01	87986426	MantaBND:143:11901:11908:0:1:0:0	SL4.0CH11	47295206	BND	A	A]SL4.0CH11:47295206]	0	2	58
SL4.0ch01	88240325	MantaBND:123:4747:4748:0:0:0:0	SL4.0CH10	5612082	BND	A	[SL4.0CH10:5612082[A	1	0	59
SL4.0ch01	88690947	MantaBND:95771:0:1:0:0:0:0	SL4.0CH03	12009566	BND	T	[SL4.0CH03:12009566[T	1	0	59
SL4.0ch01	89064010	MantaBND:115111:0:1:0:0:0:0	SL4.0CH09	47225449	BND	T	[SL4.0CH09:47225449[T	2	0	58
SL4.0ch01	89310287	MantaBND:26:17361:17362:0:2:0:1	SL4.0CH01	67189470	BND	A	[SL4.0CH01:67189470[A	1	0	59
SL4.0ch01	89348536	MantaBND:112465:0:1:0:0:0:0	SL4.0CH12	4230250	BND	C	C]SL4.0CH12:4230250]	0	1	59
SL4.0ch01	89348541	MantaBND:112465:0:1:1:0:0:1	SL4.0CH12	4230267	BND	T	[SL4.0CH12:4230267[T	1	0	59
SL4.0ch01	89876824	MantaBND:116083:0:1:0:0:0:0	SL4.0CH09	30220310	BND	A	]SL4.0CH09:30220310]CGATAGGCTGGTATATTTGTAA	5	0	55
SL4.0ch01	89877485	MantaBND:116083:1:3:0:0:0:0	SL4.0CH09	30220307	BND	G	GAAAAAAA[SL4.0CH09:30220307[,GGAAAAAAAAAAA[SL4.0CH09:30220306[	2	0	57
SL4.0ch01	90081167	MantaBND:94499:1:10:1:0:0:0	SL4.0CH11	8014255	BND	A	A[SL4.0CH11:8014255[	6	0	54
SL4.0ch01	90336457	MantaBND:97253:0:1:0:0:0:0	SL4.0CH05	2242765	BND	A	AT[SL4.0CH05:2242765[	1	0	59
SL4.0ch01	90435721	MantaBND:101216:0:1:0:0:0:1	SL4.0CH01	74172629	BND	T	[SL4.0CH01:74172629[AACATGTATAAAATAACAAACTATTAATTCAAATTAAATGTTATAGTTATAGTTTCTTTTATTTGTAATTTTGCTATCCCATTCGTATATCAAAATATATAAATAGGCCGAAAT	5	0	55
SL4.0ch01	90467616	MantaBND:116836:0:1:1:0:0:0	SL4.0CH04	20270688	BND	G	[SL4.0CH04:20270688[TCCTCTTTATGCCTTAGGTCGTACG	6	0	54
SL4.0ch01	90467618	MantaBND:116836:0:1:0:1:0:0	SL4.0CH04	20271126	BND	T	TTATGC]SL4.0CH04:20271126]	4	3	53
SL4.0ch02	1287331	MantaBND:118749:0:3:0:0:0:1	SL4.0CH09	40150346	BND	A	[SL4.0CH09:40150346[A	3	0	57
SL4.0ch02	3718609	MantaBND:118808:0:1:0:1:0:1	SL4.0CH06	18344859	BND	T	T[SL4.0CH06:18344859[	6	0	54
SL4.0ch02	5407973	MantaBND:133598:0:1:0:0:0:0	SL4.0CH04	31020674	BND	C	]SL4.0CH04:31020674]C	2	0	58
SL4.0ch02	5407982	MantaBND:120563:0:1:0:0:0:0	SL4.0CH04	31020685	BND	C	]SL4.0CH04:31020685]C	1	0	59
SL4.0ch02	5408004	MantaBND:124615:0:1:0:0:0:0	SL4.0CH04	31020669	BND	A	]SL4.0CH04:31020669]A	3	0	57
SL4.0ch02	5408007	MantaBND:104213:0:1:0:0:0:0	SL4.0CH04	31020647	BND	C	]SL4.0CH04:31020647]C,]SL4.0CH04:31020639]C,]SL4.0CH04:31020640]C,]SL4.0CH04:31020646]C	0	0	55
SL4.0ch02	5450176	MantaBND:104360:0:1:0:0:0:0	SL4.0CH02	5450746	BND	T	TAGGACTCTACATTAAGCTTGATTCTTTTGT]SL4.0CH02:5450746]	0	1	59
SL4.0ch02	5450746	MantaBND:104360:0:1:0:0:0:1	SL4.0CH02	5450176	BND	T	TACAAAAGAATCAAGCTTAATGTAGAGTCCT]SL4.0CH02:5450176]	0	1	59
SL4.0ch02	6471308	MantaBND:126196:0:1:0:0:0:0	SL4.0CH08	38939734	BND	T	TC[SL4.0CH08:38939734[	1	0	59
SL4.0ch02	9175139	MantaBND:125521:0:1:0:0:0:0	SL4.0CH07	58778726	BND	A	AT[SL4.0CH07:58778726[	2	0	58
SL4.0ch02	10092163	MantaBND:131952:0:1:0:0:0:1	SL4.0CH12	28900831	BND	G	G]SL4.0CH12:28900831]	1	0	59
SL4.0ch02	11472563	MantaBND:151:594:595:0:0:0:0	SL4.0CH06	8624522	BND	A	]SL4.0CH06:8624522]A	1	0	59
SL4.0ch02	11863002	MantaBND:133823:0:2:0:0:0:0	SL4.0CH06	31140325	BND	T	[SL4.0CH06:31140325[TGAT	1	0	59
SL4.0ch02	11863314	MantaBND:133823:0:2:1:0:0:0	SL4.0CH06	31140329	BND	A	A]SL4.0CH06:31140329]	1	0	59
SL4.0ch02	12416246	MantaBND:121242:9:10:0:0:0:0	SL4.0CH04	59042004	BND	T	T[SL4.0CH04:59042004[	3	0	57
SL4.0ch02	12416248	MantaBND:103818:10:20:0:0:0:1	SL4.0CH04	59042004	BND	T	T[SL4.0CH04:59042004[	2	0	58
SL4.0ch02	12416254	MantaBND:63963:2:12:0:0:0:1	SL4.0CH04	59041999	BND	T	T[SL4.0CH04:59041999[	6	0	54
SL4.0ch02	12416272	MantaBND:112356:0:13:0:0:0:1	SL4.0CH04	59042004	BND	C	C[SL4.0CH04:59042004[	2	0	58
SL4.0ch02	12416273	MantaBND:102980:0:4:0:0:0:1	SL4.0CH04	59042004	BND	T	T[SL4.0CH04:59042004[	5	0	55
SL4.0ch02	13418639	MantaBND:113650:0:1:0:0:0:1	SL4.0CH02	13805738	BND	A	ATTT]SL4.0CH02:13805738]	0	1	59
SL4.0ch02	13418738	MantaBND:113650:0:1:1:0:0:1	SL4.0CH02	13805767	BND	T	[SL4.0CH02:13805767[T	0	1	59
SL4.0ch02	13805738	MantaBND:113650:0:1:0:0:0:0	SL4.0CH02	13418639	BND	T	TAAA]SL4.0CH02:13418639]	0	1	59
SL4.0ch02	13805766	MantaBND:113650:0:1:1:0:0:0	SL4.0CH02	13418739	BND	A	[SL4.0CH02:13418739[A	0	1	59
SL4.0ch02	13941027	MantaBND:131575:0:1:0:0:0:0	SL4.0CH02	13948532	BND	T	[SL4.0CH02:13948532[T	1	0	59
SL4.0ch02	13948531	MantaBND:131575:0:1:0:0:0:1	SL4.0CH02	13941028	BND	A	[SL4.0CH02:13941028[A	1	0	59
SL4.0ch02	14682654	MantaBND:105332:0:1:0:0:0:1	SL4.0CH10	34728518	BND	T	T[SL4.0CH10:34728518[	1	0	59
SL4.0ch02	15292187	MantaBND:105923:0:1:0:0:0:0	SL4.0CH05	17088983	BND	G	[SL4.0CH05:17088983[G	1	0	59
SL4.0ch02	15639382	MantaBND:139000:0:1:0:0:0:0	SL4.0CH02	17655303	BND	T	T]SL4.0CH02:17655303]	0	2	58
SL4.0ch02	15639382	MantaBND:139000:0:1:1:0:0:0	SL4.0CH02	17655306	BND	T	[SL4.0CH02:17655306[T	1	1	58
SL4.0ch02	15840326	MantaBND:116532:1:2:0:0:0:1	SL4.0CH02	15840729	BND	T	[SL4.0CH02:15840729[TTT	0	1	59
SL4.0ch02	15840729	MantaBND:116532:1:2:0:0:0:0	SL4.0CH02	15840326	BND	A	[SL4.0CH02:15840326[AAA	0	1	59
SL4.0ch02	16957364	MantaBND:118128:0:1:1:0:0:0	SL4.0CH02	16957632	BND	T	T]SL4.0CH02:16957632]	1	0	59
SL4.0ch02	16957632	MantaBND:118128:0:1:1:0:0:1	SL4.0CH02	16957364	BND	C	C]SL4.0CH02:16957364]	1	0	59
SL4.0ch02	17315861	MantaBND:140973:0:1:0:0:0:1	SL4.0CH02	17319492	BND	T	TAGG]SL4.0CH02:17319492]	0	2	58
SL4.0ch02	17315897	MantaBND:118254:0:1:2:0:0:1	SL4.0CH02	17319499	BND	C	[SL4.0CH02:17319499[AGTTTTAC	0	1	59
SL4.0ch02	17319492	MantaBND:140973:0:1:0:0:0:0	SL4.0CH02	17315861	BND	C	CCCT]SL4.0CH02:17315861]	0	2	58
SL4.0ch02	17319499	MantaBND:118254:0:1:2:0:0:0	SL4.0CH02	17315897	BND	T	[SL4.0CH02:17315897[TAAAACTT	0	1	59
SL4.0ch02	17655303	MantaBND:139000:0:1:0:0:0:1	SL4.0CH02	15639382	BND	A	A]SL4.0CH02:15639382]	0	2	58
SL4.0ch02	17655304	MantaBND:139000:0:1:1:0:0:1	SL4.0CH02	15639384	BND	T	[SL4.0CH02:15639384[T	1	1	58
SL4.0ch02	18287239	MantaBND:23645:0:1:0:1:0:0	SL4.0CH01	15827241	BND	C	]SL4.0CH01:15827241]C	1	0	59
SL4.0ch02	19889301	MantaBND:139389:0:1:0:0:0:1	SL4.0CH11	17278493	BND	G	]SL4.0CH11:17278493]G	7	0	53
SL4.0ch02	20063880	MantaBND:146161:0:1:0:0:0:1	SL4.0CH04	30775270	BND	T	TCTTAT[SL4.0CH04:30775270[	3	0	57
SL4.0ch02	20567747	MantaBND:122530:0:1:0:0:0:1	SL4.0CH02	20574210	BND	A	[SL4.0CH02:20574210[A	1	0	59
SL4.0ch02	20574205	MantaBND:122530:0:1:0:0:0:0	SL4.0CH02	20567752	BND	T	[SL4.0CH02:20567752[T	1	0	59
SL4.0ch02	21022255	MantaBND:122461:1:2:0:0:0:1	SL4.0CH06	2831419	BND	G	G[SL4.0CH06:2831419[	4	0	56
SL4.0ch02	21957394	MantaBND:82705:3:4:0:0:0:1	SL4.0CH06	28883831	BND	C	C[SL4.0CH06:28883831[	3	0	57
SL4.0ch02	23176883	MantaBND:10030:0:1:0:0:0:1	SL4.0CH01	462623	BND	A	[SL4.0CH01:462623[A	1	0	59
SL4.0ch02	23176890	MantaBND:10744:0:1:0:0:0:1	SL4.0CH01	462656	BND	C	[SL4.0CH01:462656[C	1	0	59
SL4.0ch02	24534888	MantaBND:150859:0:1:0:0:0:1	SL4.0CH11	17293621	BND	T	T[SL4.0CH11:17293621[	1	0	59
SL4.0ch02	25722625	MantaBND:121073:8:11:0:0:0:0	SL4.0CH06	7346597	BND	C	]SL4.0CH06:7346597]C	1	0	59
SL4.0ch02	26061630	MantaBND:123:847:852:0:0:0:0	SL4.0CH11	19384075	BND	T	[SL4.0CH11:19384075[GCAAATTAAGTGT	3	0	57
SL4.0ch02	26069749	MantaBND:94026:0:1:0:1:0:1	SL4.0CH01	71035178	BND	A	AA[SL4.0CH01:71035178[	1	0	59
SL4.0ch02	27489001	MantaBND:121002:2:4:1:0:0:0	SL4.0CH09	60103543	BND	A	A[SL4.0CH09:60103543[	1	0	59
SL4.0ch02	27489243	MantaBND:121002:2:4:0:0:0:1	SL4.0CH09	60104145	BND	T	]SL4.0CH09:60104145]T	4	0	56
SL4.0ch02	29271658	MantaBND:26:7655:7736:0:2:0:1	SL4.0CH05	61940529	BND	A	A]SL4.0CH05:61940529]	3	0	57
SL4.0ch02	29361937	MantaBND:123:2977:2978:1:0:0:1	SL4.0CH02	29362644	BND	C	[SL4.0CH02:29362644[AAAGCCC	1	0	59
SL4.0ch02	29362644	MantaBND:123:2977:2978:1:0:0:0	SL4.0CH02	29361937	BND	G	[SL4.0CH02:29361937[GGCTTTG	1	0	59
SL4.0ch02	30440051	MantaBND:150834:0:1:1:0:0:1	SL4.0CH06	16689262	BND	G	G]SL4.0CH06:16689262]	6	0	54
SL4.0ch02	31638271	MantaBND:152059:0:1:1:3:0:1	SL4.0CH07	61771850	BND	A	A]SL4.0CH07:61771850]	1	0	59
SL4.0ch02	31756509	MantaBND:151:14286:14287:0:0:0:1	SL4.0CH05	10325768	BND	A	A]SL4.0CH05:10325768]	2	0	58
SL4.0ch02	31756513	MantaBND:162:11552:11558:0:0:0:1	SL4.0CH05	10325777	BND	A	A]SL4.0CH05:10325777]	3	0	57
SL4.0ch02	33085055	MantaBND:151:2905:2907:0:0:0:0	SL4.0CH11	16783876	BND	G	G[SL4.0CH11:16783876[	1	0	59
SL4.0ch02	34979662	MantaBND:154781:0:1:0:0:0:1	SL4.0CH10	62080688	BND	G	]SL4.0CH10:62080688]TG	12	0	48
SL4.0ch02	36048055	MantaBND:174677:0:1:1:0:0:1	SL4.0CH09	7451081	BND	A	]SL4.0CH09:7451081]A	1	0	59
SL4.0ch02	36048280	MantaBND:174677:0:1:0:0:0:0	SL4.0CH09	7450730	BND	C	C[SL4.0CH09:7450730[	1	0	59
SL4.0ch02	36287519	MantaBND:107683:0:1:1:0:0:1	SL4.0CH01	81288977	BND	T	[SL4.0CH01:81288977[T	5	0	55
SL4.0ch02	36729181	MantaBND:162320:0:0:3:0:0:1	SL4.0CH02	36729683	BND	G	[SL4.0CH02:36729683[AACCGCACAAAGTATTCAAATTCCCTTTCTGCCCACTGGATAATTCACCAACCAGATTCAGTAGTAGTCAAAGAAATGG	0	9	51
SL4.0ch02	36729683	MantaBND:162320:0:0:3:0:0:0	SL4.0CH02	36729181	BND	A	[SL4.0CH02:36729181[CATTTCTTTGACTACTACTGAATCTGGTTGGTGAATTATCCAGTGGGCAGAAAGGGAATTTGAATACTTTGTGCGGTTA	0	9	51
SL4.0ch02	37722923	MantaBND:128:31162:31186:0:4:0:1	SL4.0CH02	37723978	BND	T	T]SL4.0CH02:37723978]	2	0	58
SL4.0ch02	37723977	MantaBND:128:31162:31186:0:4:0:0	SL4.0CH02	37722924	BND	G	G]SL4.0CH02:37722924]	2	0	58
SL4.0ch02	38657678	MantaBND:151:16678:16679:0:0:0:0	SL4.0CH03	3518357	BND	C	]SL4.0CH03:3518357]C	2	0	58
SL4.0ch02	39527410	MantaBND:165129:0:2:0:0:0:1	SL4.0CH07	61608876	BND	G	]SL4.0CH07:61608876]G	3	0	57
SL4.0ch02	39996288	MantaBND:123:3096:3097:0:0:0:0	SL4.0CH12	60434705	BND	T	]SL4.0CH12:60434705]T	1	0	59
SL4.0ch02	39998368	MantaBND:162:6235:6239:0:0:0:0	SL4.0CH12	60434702	BND	C	]SL4.0CH12:60434702]C	1	0	59
SL4.0ch02	39998407	MantaBND:143:3908:3914:0:0:0:0	SL4.0CH12	60434715	BND	G	]SL4.0CH12:60434715]G	1	0	59
SL4.0ch02	40075065	MantaBND:123:6717:6848:0:7:0:1	SL4.0CH06	34306420	BND	A	]SL4.0CH06:34306420]A	3	1	56
SL4.0ch02	40086347	MantaBND:26:16866:16881:0:0:0:0	SL4.0CH04	7481615	BND	T	]SL4.0CH04:7481615]T	10	0	50
SL4.0ch02	40258608	MantaBND:166156:0:1:0:0:0:1	SL4.0CH02	40258965	BND	A	[SL4.0CH02:40258965[TA	1	0	59
SL4.0ch02	40258734	MantaBND:167849:1:2:0:0:0:1	SL4.0CH09	10604201	BND	T	T[SL4.0CH09:10604201[	2	0	58
SL4.0ch02	40258965	MantaBND:166156:0:1:0:0:0:0	SL4.0CH02	40258608	BND	C	[SL4.0CH02:40258608[AC	1	0	59
SL4.0ch02	40472099	MantaBND:166392:0:3:0:0:0:0	SL4.0CH07	62683003	BND	T	]SL4.0CH07:62683003]T	19	3	38
SL4.0ch02	40834717	MantaBND:22450:0:1:0:0:0:0	SL4.0CH01	11435207	BND	T	TGGA]SL4.0CH01:11435207]	3	0	57
SL4.0ch02	42072423	MantaBND:167348:6:7:0:0:0:1	SL4.0CH11	4576719	BND	T	]SL4.0CH11:4576719]T	7	0	53
SL4.0ch02	42072804	MantaBND:167348:6:7:1:0:0:1	SL4.0CH11	4576711	BND	C	C[SL4.0CH11:4576711[	8	0	52
SL4.0ch02	42108158	MantaBND:167980:0:1:0:0:0:1	SL4.0CH02	43416964	BND	A	[SL4.0CH02:43416964[A,[SL4.0CH02:43416956[A,[SL4.0CH02:43416955[A	1	0	59
SL4.0ch02	42344435	MantaBND:15010:12:13:0:0:0:0	SL4.0CH12	57950812	BND	G	G[SL4.0CH12:57950812[	4	0	56
SL4.0ch02	43176805	MantaBND:169150:0:1:0:3:0:0	SL4.0CH11	30763905	BND	T	[SL4.0CH11:30763905[TCCTTAAGTGCTTAAGTTTCAACACTT	51	0	9
SL4.0ch02	43409461	MantaBND:48971:3:4:0:1:0:1	SL4.0CH02	43433132	BND	G	[SL4.0CH02:43433132[G	2	0	58
SL4.0ch02	43416964	MantaBND:167980:0:1:0:0:0:0	SL4.0CH02	42108158	BND	A	[SL4.0CH02:42108158[A	1	0	59
SL4.0ch02	43433129	MantaBND:48971:3:4:0:1:0:0	SL4.0CH02	43409464	BND	T	[SL4.0CH02:43409464[T	2	0	58
SL4.0ch02	43623440	MantaBND:169618:0:1:0:0:0:1	SL4.0CH04	52705345	BND	T	T[SL4.0CH04:52705345[	9	0	51
SL4.0ch02	43765366	MantaBND:172221:0:1:0:1:0:1	SL4.0CH02	43765843	BND	T	[SL4.0CH02:43765843[TATATATATAT	2	0	58
SL4.0ch02	43765843	MantaBND:172221:0:1:0:1:0:0	SL4.0CH02	43765366	BND	T	[SL4.0CH02:43765366[TATATATATAT	2	0	58
SL4.0ch02	44078382	MantaBND:143:13694:13698:0:0:0:1	SL4.0CH09	2721497	BND	A	[SL4.0CH09:2721497[ATA	2	0	58
SL4.0ch02	44078690	MantaBND:151:10382:10383:0:0:0:0	SL4.0CH09	2721502	BND	C	C]SL4.0CH09:2721502]	5	0	55
SL4.0ch02	44330436	MantaBND:170074:0:1:1:0:0:0	SL4.0CH02	44331026	BND	A	[SL4.0CH02:44331026[A	1	0	59
SL4.0ch02	44330471	MantaBND:144765:0:1:1:0:0:0	SL4.0CH02	44331010	BND	T	[SL4.0CH02:44331010[T	3	1	56
SL4.0ch02	44330472	MantaBND:144765:0:1:0:0:0:1	SL4.0CH02	44331012	BND	A	A]SL4.0CH02:44331012]	0	5	55
SL4.0ch02	44331008	MantaBND:144765:0:1:0:0:0:0	SL4.0CH02	44330476	BND	A	A]SL4.0CH02:44330476]	0	5	55
SL4.0ch02	44331009	MantaBND:144765:0:1:1:0:0:1	SL4.0CH02	44330472	BND	A	[SL4.0CH02:44330472[A	3	1	56
SL4.0ch02	44331026	MantaBND:170074:0:1:1:0:0:1	SL4.0CH02	44330436	BND	C	[SL4.0CH02:44330436[C,[SL4.0CH02:44330430[C	1	0	59
SL4.0ch02	44371961	MantaBND:170427:0:1:0:0:0:0	SL4.0CH02	44373867	BND	C	[SL4.0CH02:44373867[C,[SL4.0CH02:44373865[C	0	1	58
SL4.0ch02	44371971	MantaBND:130948:0:1:0:0:0:0	SL4.0CH02	44373881	BND	T	[SL4.0CH02:44373881[T	0	3	57
SL4.0ch02	44373861	MantaBND:130948:0:1:0:0:0:1	SL4.0CH02	44371991	BND	G	[SL4.0CH02:44371991[G	0	3	57
SL4.0ch02	44373865	MantaBND:172782:0:1:0:0:0:1	SL4.0CH02	44371961	BND	A	[SL4.0CH02:44371961[A	0	1	59
SL4.0ch02	44373867	MantaBND:170427:0:1:0:0:0:1	SL4.0CH02	44371961	BND	T	[SL4.0CH02:44371961[T	0	1	59
SL4.0ch02	44385648	MantaBND:114456:1:4:0:0:0:0	SL4.0CH03	41488006	BND	C	CATG[SL4.0CH03:41488006[	3	0	57
SL4.0ch02	44385988	MantaBND:97890:0:3:0:0:0:1	SL4.0CH01	75174408	BND	C	C]SL4.0CH01:75174408]	1	0	59
SL4.0ch02	44386043	MantaBND:102786:0:1:0:0:0:1	SL4.0CH01	75174446	BND	T	T]SL4.0CH01:75174446]	1	0	59
SL4.0ch02	44386061	MantaBND:78052:1:3:0:0:0:1	SL4.0CH01	75174399	BND	G	G]SL4.0CH01:75174399]	1	0	59
SL4.0ch02	44914389	MantaBND:173385:0:1:0:0:0:1	SL4.0CH07	32237811	BND	T	T[SL4.0CH07:32237811[	1	0	59
SL4.0ch02	44918039	MantaBND:173173:0:1:1:0:0:0	SL4.0CH10	154822	BND	T	T[SL4.0CH10:154822[	1	0	59
SL4.0ch02	44942683	MantaBND:151:7083:7315:0:0:0:1	SL4.0CH06	22451205	BND	G	]SL4.0CH06:22451205]G	1	0	59
SL4.0ch02	45107479	MantaBND:26:3132:3144:0:0:0:0	SL4.0CH09	2719358	BND	C	[SL4.0CH09:2719358[C	2	0	58
SL4.0ch02	45107498	MantaBND:12500:1:13:0:0:0:0	SL4.0CH09	2719350	BND	A	[SL4.0CH09:2719350[A	1	0	59
SL4.0ch02	45342281	MantaBND:151:6174:6176:0:0:0:0	SL4.0CH06	2326838	BND	T	]SL4.0CH06:2326838]T	1	0	59
SL4.0ch02	45342315	MantaBND:162:11479:11484:0:0:0:1	SL4.0CH06	2326822	BND	A	]SL4.0CH06:2326822]A	1	0	59
SL4.0ch02	45399750	MantaBND:145946:0:1:2:0:0:1	SL4.0CH02	45400189	BND	T	[SL4.0CH02:45400189[T	0	1	59
SL4.0ch02	45400188	MantaBND:145946:0:1:2:0:0:0	SL4.0CH02	45399751	BND	A	[SL4.0CH02:45399751[A	0	1	59
SL4.0ch02	47122255	MantaBND:173035:1:2:0:0:0:0	SL4.0CH07	31915827	BND	A	]SL4.0CH07:31915827]TA	12	0	48
SL4.0ch02	47925997	MantaBND:173895:0:1:0:0:0:0	SL4.0CH07	65014185	BND	T	TCTTCTCCTTA]SL4.0CH07:65014185]	2	0	58
SL4.0ch02	48087021	MantaBND:174096:0:2:0:0:0:0	SL4.0CH11	10471682	BND	C	C[SL4.0CH11:10471682[	33	0	27
SL4.0ch02	48285283	MantaBND:19837:15:16:0:0:0:1	SL4.0CH04	49345309	BND	C	C]SL4.0CH04:49345309]	8	0	52
SL4.0ch02	48786035	MantaBND:174630:0:2:0:2:0:0	SL4.0CH07	64506189	BND	A	[SL4.0CH07:64506189[A	11	0	49
SL4.0ch02	48877730	MantaBND:149318:0:1:0:0:0:1	SL4.0CH11	52953263	BND	T	T[SL4.0CH11:52953263[	1	0	59
SL4.0ch02	49600444	MantaBND:162:27065:27066:0:0:0:0	SL4.0CH06	3642075	BND	G	]SL4.0CH06:3642075]AGAAAATG	5	0	55
SL4.0ch02	50665716	MantaBND:128:50887:50910:0:3:0:1	SL4.0CH09	50922322	BND	C	CAAGATAAT]SL4.0CH09:50922322]	3	0	57
SL4.0ch02	51200178	MantaBND:151:3171:3173:0:1:0:0	SL4.0CH06	23602246	BND	A	[SL4.0CH06:23602246[A	3	0	57
SL4.0ch02	51543935	MantaBND:62626:6:7:0:0:0:0	SL4.0CH03	59337584	BND	A	[SL4.0CH03:59337584[A	1	0	59
SL4.0ch02	51626517	MantaBND:152432:1:2:0:0:0:0	SL4.0CH08	8689985	BND	T	T[SL4.0CH08:8689985[	1	0	59
SL4.0ch02	51953161	MantaBND:26:28739:28741:0:0:0:0	SL4.0CH11	46958178	BND	G	]SL4.0CH11:46958178]G	5	0	55
SL4.0ch02	52156579	MantaBND:177515:0:1:0:0:0:1	SL4.0CH09	43971134	BND	C	]SL4.0CH09:43971134]C	3	2	55
SL4.0ch02	52156734	MantaBND:177515:1:2:0:0:0:1	SL4.0CH09	43971137	BND	A	A[SL4.0CH09:43971137[	2	0	58
SL4.0ch02	52369945	MantaBND:177604:0:1:0:0:0:0	SL4.0CH02	52462912	BND	T	TCGATCCTTTTTTTTTTGGTGGATCACTATACACTTTATAATTATATGAGAAATAATTATT]SL4.0CH02:52462912]	4	0	56
SL4.0ch02	52462912	MantaBND:177604:0:1:0:0:0:1	SL4.0CH02	52369945	BND	C	CAATAATTATTTCTCATATAATTATAAAGTGTATAGTGATCCACCAAAAAAAAAAGGATCG]SL4.0CH02:52369945]	4	0	56
SL4.0ch02	52533186	MantaBND:177633:0:1:0:1:0:0	SL4.0CH06	3731091	BND	T	T]SL4.0CH06:3731091]	3	50	7
SL4.0ch02	52894790	MantaBND:178095:0:1:0:0:0:0	SL4.0CH09	57757038	BND	T	T[SL4.0CH09:57757038[	1	0	59
SL4.0ch02	53211438	MantaBND:178316:0:1:0:0:0:1	SL4.0CH07	60471558	BND	C	C]SL4.0CH07:60471558]	2	0	58
SL4.0ch02	53211438	MantaBND:173631:0:1:0:0:0:1	SL4.0CH07	60471453	BND	C	C]SL4.0CH07:60471453]	1	0	59
SL4.0ch03	99918	MantaBND:173746:0:1:1:1:0:1	SL4.0CH06	3415374	BND	G	[SL4.0CH06:3415374[G	5	0	55
SL4.0ch03	215037	MantaBND:178912:2:3:0:0:0:1	SL4.0CH03	215800	BND	A	A]SL4.0CH03:215800]	0	1	59
SL4.0ch03	215799	MantaBND:178912:2:3:0:0:0:0	SL4.0CH03	215038	BND	T	T]SL4.0CH03:215038]	0	1	59
SL4.0ch03	2898175	MantaBND:106049:0:1:0:0:0:1	SL4.0CH01	79211049	BND	A	]SL4.0CH01:79211049]A	4	0	56
SL4.0ch03	3518357	MantaBND:151:16678:16679:0:0:0:1	SL4.0CH02	38657678	BND	A	A[SL4.0CH02:38657678[	2	0	58
SL4.0ch03	3628515	MantaBND:177442:0:1:0:0:0:0	SL4.0CH07	63030594	BND	G	G]SL4.0CH07:63030594]	1	0	59
SL4.0ch03	3715552	MantaBND:143:7589:7593:0:0:0:1	SL4.0CH05	63369991	BND	C	C]SL4.0CH05:63369991]	1	0	59
SL4.0ch03	4598421	MantaBND:7086:3:6:0:0:0:1	SL4.0CH09	39591	BND	C	[SL4.0CH09:39591[C	1	0	59
SL4.0ch03	4725314	MantaBND:20536:18:19:0:0:0:1	SL4.0CH07	58607182	BND	T	TTT]SL4.0CH07:58607182]	2	0	58
SL4.0ch03	4996316	MantaBND:95161:0:1:0:1:0:1	SL4.0CH01	72778241	BND	A	A]SL4.0CH01:72778241]	1	0	59
SL4.0ch03	5010669	MantaBND:112743:0:2:0:0:0:1	SL4.0CH01	85387101	BND	C	C[SL4.0CH01:85387101[	1	0	59
SL4.0ch03	5625741	MantaBND:89282:12:34:0:2:0:0	SL4.0CH07	63777655	BND	C	C[SL4.0CH07:63777655[	8	0	52
SL4.0ch03	6158539	MantaBND:184508:0:1:0:0:0:0	SL4.0CH04	61602844	BND	A	[SL4.0CH04:61602844[A	2	0	58
SL4.0ch03	6158540	MantaBND:188501:0:1:0:0:0:0	SL4.0CH04	61602846	BND	A	[SL4.0CH04:61602846[A	1	0	59
SL4.0ch03	6158548	MantaBND:179568:0:2:0:0:0:0	SL4.0CH04	61602844	BND	A	[SL4.0CH04:61602844[A	1	0	59
SL4.0ch03	6297995	MantaBND:123:8532:8533:0:0:0:0	SL4.0CH10	48868909	BND	A	[SL4.0CH10:48868909[A	1	0	59
SL4.0ch03	7062377	MantaBND:151:7093:7094:0:0:0:0	SL4.0CH06	16795426	BND	T	T]SL4.0CH06:16795426]	2	0	58
SL4.0ch03	7209855	MantaBND:31442:1:6:0:3:0:1	SL4.0CH01	80809520	BND	C	C[SL4.0CH01:80809520[	32	0	28
SL4.0ch03	7644653	MantaBND:144208:0:1:0:0:0:1	SL4.0CH11	14706180	BND	T	T]SL4.0CH11:14706180]	1	0	59
SL4.0ch03	8520593	MantaBND:186786:0:1:0:0:0:0	SL4.0CH09	14816729	BND	T	T]SL4.0CH09:14816729]	1	0	59
SL4.0ch03	10310796	MantaBND:204490:0:1:0:0:0:0	SL4.0CH10	11709025	BND	T	[SL4.0CH10:11709025[T	1	0	59
SL4.0ch03	10310805	MantaBND:146549:0:1:0:0:0:0	SL4.0CH10	11709034	BND	A	[SL4.0CH10:11709034[A	1	0	59
SL4.0ch03	10587453	MantaBND:193172:0:2:0:0:0:0	SL4.0CH05	60806491	BND	T	]SL4.0CH05:60806491]T	1	0	59
SL4.0ch03	12009565	MantaBND:95771:0:1:0:0:0:1	SL4.0CH01	88690948	BND	A	[SL4.0CH01:88690948[A	1	0	59
SL4.0ch03	12066329	MantaBND:320605:0:1:0:1:0:1	SL4.0CH06	3154073	BND	A	]SL4.0CH06:3154073]CAAA	3	0	57
SL4.0ch03	12097231	MantaBND:162:816:820:0:0:0:1	SL4.0CH06	21001095	BND	T	[SL4.0CH06:21001095[AT	5	0	55
SL4.0ch03	12791975	MantaBND:192201:0:1:0:0:0:1	SL4.0CH07	43784334	BND	A	]SL4.0CH07:43784334]A	1	0	59
SL4.0ch03	12854762	MantaBND:192558:0:1:0:0:0:1	SL4.0CH09	26678975	BND	A	[SL4.0CH09:26678975[A	1	0	59
SL4.0ch03	14102440	MantaBND:19044:0:1:0:0:0:1	SL4.0CH01	10764675	BND	T	[SL4.0CH01:10764675[T	9	0	51
SL4.0ch03	15072606	MantaBND:194608:0:2:0:1:0:0	SL4.0CH07	57525815	BND	A	AC]SL4.0CH07:57525815]	2	0	58
SL4.0ch03	15153827	MantaBND:134182:1:4:0:0:0:1	SL4.0CH12	43850203	BND	A	]SL4.0CH12:43850203]TA	3	0	57
SL4.0ch03	15155873	MantaBND:134182:3:4:0:1:0:1	SL4.0CH12	43850203	BND	G	G[SL4.0CH12:43850203[	3	0	57
SL4.0ch03	15582364	MantaBND:190255:0:1:0:0:0:1	SL4.0CH04	54962167	BND	G	]SL4.0CH04:54962167]G,]SL4.0CH04:54962186]G	1	0	59
SL4.0ch03	15887993	MantaBND:211299:0:1:0:0:0:1	SL4.0CH07	47640311	BND	T	T]SL4.0CH07:47640311]	4	0	56
SL4.0ch03	16205271	MantaBND:32:17386:17387:0:0:0:0	SL4.0CH05	28608718	BND	C	[SL4.0CH05:28608718[C	1	0	59
SL4.0ch03	16578906	MantaBND:191183:0:1:0:4:0:0	SL4.0CH09	20307123	BND	G	G]SL4.0CH09:20307123]	6	2	52
SL4.0ch03	18595043	MantaBND:128:42877:42880:0:7:0:0	SL4.0CH09	37069073	BND	A	]SL4.0CH09:37069073]A	2	0	58
SL4.0ch03	18841236	MantaBND:154568:0:1:0:0:0:0	SL4.0CH08	35247565	BND	A	]SL4.0CH08:35247565]A	1	0	59
SL4.0ch03	19876670	MantaBND:333723:0:1:0:3:0:1	SL4.0CH03	57152001	BND	T	TGTGTTTGTGTGTGTGTGTGTGTGTGTGTGTGTGTGTGTATGTGAGTCAACTTGAGCAACAATTTTAGTGACCTAACTAA]SL4.0CH03:57152001]	3	0	57
SL4.0ch03	22501665	MantaBND:87020:4:21:0:0:0:1	SL4.0CH09	26131052	BND	T	T]SL4.0CH09:26131052]	3	0	57
SL4.0ch03	23473930	MantaBND:206395:0:4:0:0:0:1	SL4.0CH09	59471330	BND	A	A[SL4.0CH09:59471330[	1	0	59
SL4.0ch03	23848916	MantaBND:98986:3:8:0:0:0:0	SL4.0CH07	62191989	BND	T	T]SL4.0CH07:62191989]	1	0	59
SL4.0ch03	24311449	MantaBND:342403:0:1:0:0:0:0	SL4.0CH03	24315200	BND	A	[SL4.0CH03:24315200[A	2	0	58
SL4.0ch03	24315198	MantaBND:342403:0:1:0:0:0:1	SL4.0CH03	24311451	BND	G	[SL4.0CH03:24311451[G	2	0	58
SL4.0ch03	25608972	MantaBND:225357:0:1:0:0:0:0	SL4.0CH04	59039390	BND	T	T[SL4.0CH04:59039390[	1	0	59
SL4.0ch03	26003872	MantaBND:58356:0:1:0:1:0:0	SL4.0CH01	52123532	BND	A	A]SL4.0CH01:52123532]	1	0	59
SL4.0ch03	26643831	MantaBND:210614:0:20:0:0:0:0	SL4.0CH09	64285519	BND	A	A[SL4.0CH09:64285519[	1	0	59
SL4.0ch03	28346111	MantaBND:118552:28:29:0:2:0:1	SL4.0CH08	57606645	BND	T	T[SL4.0CH08:57606645[	3	0	57
SL4.0ch03	28416223	MantaBND:142092:3:4:0:4:0:0	SL4.0CH04	54806534	BND	A	]SL4.0CH04:54806534]A	18	0	42
SL4.0ch03	29818055	MantaBND:10894:1:2:0:0:0:1	SL4.0CH04	64211545	BND	G	]SL4.0CH04:64211545]G	2	0	58
SL4.0ch03	29818066	MantaBND:11275:1:2:0:0:0:1	SL4.0CH04	64211560	BND	C	]SL4.0CH04:64211560]C	1	0	59
SL4.0ch03	31831092	MantaBND:77937:13:14:0:0:0:1	SL4.0CH09	51461593	BND	A	A[SL4.0CH09:51461593[	2	0	58
SL4.0ch03	32538997	MantaBND:218534:0:1:0:0:0:1	SL4.0CH06	27687352	BND	T	T[SL4.0CH06:27687352[	1	0	59
SL4.0ch03	32539016	MantaBND:8338:9:17:0:0:0:0	SL4.0CH06	27687403	BND	A	A[SL4.0CH06:27687403[	1	0	59
SL4.0ch03	35986839	MantaBND:188447:1:2:0:5:0:0	SL4.0CH11	43720093	BND	T	T[SL4.0CH11:43720093[	6	0	54
SL4.0ch03	36282202	MantaBND:83005:0:1:0:0:0:1	SL4.0CH01	57580727	BND	T	[SL4.0CH01:57580727[T	1	0	59
SL4.0ch03	37609757	MantaBND:98118:1:2:0:0:0:0	SL4.0CH07	62562708	BND	A	[SL4.0CH07:62562708[A,[SL4.0CH07:62562712[A	1	0	59
SL4.0ch03	39188387	MantaBND:173596:0:2:0:0:0:1	SL4.0CH08	36091523	BND	C	[SL4.0CH08:36091523[C	1	0	59
SL4.0ch03	40296757	MantaBND:127056:2:4:0:0:0:0	SL4.0CH10	5597996	BND	C	C[SL4.0CH10:5597996[	1	0	59
SL4.0ch03	40638949	MantaBND:228498:0:1:0:0:0:0	SL4.0CH09	39579915	BND	G	[SL4.0CH09:39579915[G	1	0	59
SL4.0ch03	41488006	MantaBND:114456:1:4:0:0:0:1	SL4.0CH02	44385648	BND	T	]SL4.0CH02:44385648]ATGT	3	0	57
SL4.0ch03	45081768	MantaBND:234006:0:2:0:0:0:1	SL4.0CH06	32335150	BND	A	A[SL4.0CH06:32335150[	1	0	59
SL4.0ch03	45793881	MantaBND:128:21634:21635:0:0:0:1	SL4.0CH03	45794636	BND	A	A]SL4.0CH03:45794636]	1	0	59
SL4.0ch03	45794636	MantaBND:128:21634:21635:0:0:0:0	SL4.0CH03	45793881	BND	G	G]SL4.0CH03:45793881]	1	0	59
SL4.0ch03	46267393	MantaBND:123:4731:4736:0:1:0:1	SL4.0CH04	54903752	BND	C	C[SL4.0CH04:54903752[	3	0	57
SL4.0ch03	46267394	MantaBND:151:5574:5587:0:5:0:1	SL4.0CH05	60487178	BND	A	A]SL4.0CH05:60487178]	38	0	22
SL4.0ch03	46324524	MantaBND:225996:0:0:3:0:0:0	SL4.0CH03	46324660	BND	G	[SL4.0CH03:46324660[G	1	0	59
SL4.0ch03	46324654	MantaBND:225996:0:0:3:0:0:1	SL4.0CH03	46324530	BND	T	[SL4.0CH03:46324530[T	1	0	59
SL4.0ch03	46667945	MantaBND:15010:1:4:0:0:0:0	SL4.0CH10	56226214	BND	A	AA]SL4.0CH10:56226214]	2	0	58
SL4.0ch03	47148245	MantaBND:143:12556:12560:0:0:0:0	SL4.0CH04	54866945	BND	G	]SL4.0CH04:54866945]G	1	0	59
SL4.0ch03	47318985	MantaBND:180257:0:1:0:0:0:0	SL4.0CH04	54672636	BND	C	]SL4.0CH04:54672636]C	1	0	59
SL4.0ch03	48870355	MantaBND:239581:0:1:0:0:0:1	SL4.0CH04	5306218	BND	A	[SL4.0CH04:5306218[A	2	0	58
SL4.0ch03	50480367	MantaBND:162:11810:11811:0:0:0:1	SL4.0CH06	11363297	BND	T	T[SL4.0CH06:11363297[	1	0	59
SL4.0ch03	51279949	MantaBND:259382:0:1:0:0:0:0	SL4.0CH04	17622968	BND	G	G]SL4.0CH04:17622968]	4	0	56
SL4.0ch03	51325246	MantaBND:202971:0:2:0:0:0:0	SL4.0CH08	60291285	BND	T	]SL4.0CH08:60291285]T	1	0	59
SL4.0ch03	51325328	MantaBND:202971:0:1:0:0:0:0	SL4.0CH08	60290905	BND	C	C[SL4.0CH08:60290905[	1	0	59
SL4.0ch03	51628952	MantaBND:242770:0:1:0:0:0:0	SL4.0CH11	19490668	BND	G	]SL4.0CH11:19490668]G	1	0	59
SL4.0ch03	52845402	MantaBND:241902:0:1:0:1:0:0	SL4.0CH10	32719109	BND	T	]SL4.0CH10:32719109]CT	1	0	59
SL4.0ch03	54145770	MantaBND:151:4329:4367:0:0:0:1	SL4.0CH06	18872295	BND	A	]SL4.0CH06:18872295]A,]SL4.0CH06:18872337]A	0	1	59
SL4.0ch03	54145779	MantaBND:151:4329:4361:0:0:0:0	SL4.0CH06	32984825	BND	A	]SL4.0CH06:32984825]A	1	0	59
SL4.0ch03	54145786	MantaBND:151:4329:4346:0:0:0:0	SL4.0CH09	11711663	BND	A	[SL4.0CH09:11711663[A	1	0	59
SL4.0ch03	54145790	MantaBND:123:1565:3632:0:0:0:0	SL4.0CH06	16169736	BND	C	]SL4.0CH06:16169736]C	1	0	59
SL4.0ch03	54145792	MantaBND:151:4329:4339:0:0:0:1	SL4.0CH09	16559212	BND	C	[SL4.0CH09:16559212[C	1	0	59
SL4.0ch03	54145797	MantaBND:151:4329:4354:0:0:0:0	SL4.0CH09	43929635	BND	A	]SL4.0CH09:43929635]A	2	0	58
SL4.0ch03	54145798	MantaBND:123:1565:3659:0:0:0:1	SL4.0CH06	18610684	BND	A	[SL4.0CH06:18610684[A,[SL4.0CH06:18610813[A	1	0	58
SL4.0ch03	54145799	MantaBND:151:4329:4341:0:0:0:1	SL4.0CH06	20146588	BND	T	]SL4.0CH06:20146588]T,]SL4.0CH06:16169736]T	1	0	59
SL4.0ch03	54145801	MantaBND:151:4329:4395:0:0:0:1	SL4.0CH06	27460239	BND	T	[SL4.0CH06:27460239[T	1	0	59
SL4.0ch03	54145803	MantaBND:151:4329:4365:0:0:0:1	SL4.0CH06	4209284	BND	A	]SL4.0CH06:4209284]A,]SL4.0CH06:16169738]A,[SL4.0CH05:57441686[A	1	0	57
SL4.0ch03	54145804	MantaBND:162:16:1154:0:0:0:0	SL4.0CH06	23407246	BND	A	[SL4.0CH06:23407246[A	3	1	56
SL4.0ch03	54145806	MantaBND:162:16:8604:0:0:0:1	SL4.0CH06	3670858	BND	T	[SL4.0CH06:3670858[T	1	0	59
SL4.0ch03	54145808	MantaBND:151:4329:4336:0:0:0:0	SL4.0CH06	23407189	BND	T	[SL4.0CH06:23407189[T	1	0	59
SL4.0ch03	54145810	MantaBND:123:1560:1565:0:0:0:1	SL4.0CH06	3670797	BND	C	[SL4.0CH06:3670797[C	1	0	59
SL4.0ch03	54145811	MantaBND:151:4329:4342:0:0:0:1	SL4.0CH06	11978189	BND	A	]SL4.0CH06:11978189]A	1	0	59
SL4.0ch03	54145812	MantaBND:151:4329:4355:0:0:0:0	SL4.0CH09	36317847	BND	A	]SL4.0CH09:36317847]A	0	1	59
SL4.0ch03	54391612	MantaBND:186943:1:2:0:0:0:1	SL4.0CH10	56129322	BND	A	]SL4.0CH10:56129322]A	1	0	59
SL4.0ch03	54546160	MantaBND:145748:1:4:0:0:0:1	SL4.0CH05	8183616	BND	A	A[SL4.0CH05:8183616[	1	0	59
SL4.0ch03	55484133	MantaBND:246645:0:1:0:0:0:1	SL4.0CH10	2485812	BND	G	G]SL4.0CH10:2485812]	1	0	59
SL4.0ch03	56291365	MantaBND:143:4944:4946:0:0:0:0	SL4.0CH04	55228901	BND	A	[SL4.0CH04:55228901[A	1	0	59
SL4.0ch03	56478912	MantaBND:151:5620:5627:0:3:0:1	SL4.0CH08	57902135	BND	G	]SL4.0CH08:57902135]G	52	0	8
SL4.0ch03	56851603	MantaBND:245463:0:1:0:0:0:0	SL4.0CH12	65880319	BND	A	A]SL4.0CH12:65880319]	1	0	59
SL4.0ch03	57152001	MantaBND:333723:0:1:0:3:0:0	SL4.0CH03	19876670	BND	C	CTTAGTTAGGTCACTAAAATTGTTGCTCAAGTTGACTCACATACACACACACACACACACACACACACACACACAAACAC]SL4.0CH03:19876670]	3	0	57
SL4.0ch03	57520563	MantaBND:151:8187:8188:1:0:0:1	SL4.0CH06	38160676	BND	T	]SL4.0CH06:38160676]T	26	5	29
SL4.0ch03	57644752	MantaBND:151:3784:4610:0:0:0:1	SL4.0CH04	55227275	BND	T	]SL4.0CH04:55227275]T	6	0	54
SL4.0ch03	57645975	MantaBND:151:3784:4611:0:0:0:1	SL4.0CH04	55227245	BND	T	TTACAG[SL4.0CH04:55227245[	57	0	3
SL4.0ch03	57688386	MantaBND:248639:0:1:0:1:0:0	SL4.0CH04	6013420	BND	T	]SL4.0CH04:6013420]T	6	0	54
SL4.0ch03	57721593	MantaBND:245748:0:1:0:0:0:0	SL4.0CH08	3576987	BND	A	[SL4.0CH08:3576987[A,[SL4.0CH08:3576972[A	1	0	59
SL4.0ch03	57841677	MantaBND:32:14448:14450:0:0:0:0	SL4.0CH12	4661748	BND	A	AGGA]SL4.0CH12:4661748]	10	1	49
SL4.0ch03	57960970	MantaBND:13059:5:7:0:0:0:1	SL4.0CH11	49780857	BND	T	[SL4.0CH11:49780857[T	16	0	44
SL4.0ch03	58012140	MantaBND:246282:0:1:0:0:0:0	SL4.0CH09	59671869	BND	T	[SL4.0CH09:59671869[T	1	0	59
SL4.0ch03	58012154	MantaBND:249035:0:1:0:0:0:1	SL4.0CH09	59671890	BND	T	[SL4.0CH09:59671890[T	1	0	59
SL4.0ch03	58012167	MantaBND:187872:0:1:0:0:0:1	SL4.0CH09	59671858	BND	T	[SL4.0CH09:59671858[T	1	0	59
SL4.0ch03	58042126	MantaBND:104835:3:4:0:1:0:1	SL4.0CH10	1782904	BND	T	[SL4.0CH10:1782904[T	1	0	59
SL4.0ch03	58684084	MantaBND:123:8119:8122:0:1:0:1	SL4.0CH09	65438663	BND	T	]SL4.0CH09:65438663]T	2	0	58
SL4.0ch03	58684297	MantaBND:26:14144:14149:1:0:0:1	SL4.0CH09	65438633	BND	A	A[SL4.0CH09:65438633[	1	0	59
SL4.0ch03	59337584	MantaBND:62626:6:7:0:0:0:1	SL4.0CH02	51543935	BND	G	[SL4.0CH02:51543935[G	1	0	59
SL4.0ch03	60209421	MantaBND:203616:4:5:0:1:0:1	SL4.0CH09	5562232	BND	T	]SL4.0CH09:5562232]T	2	1	57
SL4.0ch03	60535961	MantaBND:248405:1:2:0:1:0:0	SL4.0CH06	11211488	BND	A	AAAAAAAAAAA]SL4.0CH06:11211488]	1	0	59
SL4.0ch03	61224515	MantaBND:26:31339:31341:0:0:0:0	SL4.0CH10	5132236	BND	A	[SL4.0CH10:5132236[A	4	0	56
SL4.0ch03	61345339	MantaBND:151:2886:2886:0:1:0:0	SL4.0CH03	61345732	BND	T	T]SL4.0CH03:61345732]	3	13	44
SL4.0ch03	61345341	MantaBND:151:2886:2886:5:0:0:0	SL4.0CH03	61345718	BND	T	[SL4.0CH03:61345718[TAGGAACGT	3	1	56
SL4.0ch03	61345718	MantaBND:151:2886:2886:5:0:0:1	SL4.0CH03	61345341	BND	T	[SL4.0CH03:61345341[CGTTCCTAT	3	1	56
SL4.0ch03	61345730	MantaBND:151:2886:2886:0:1:0:1	SL4.0CH03	61345341	BND	G	G]SL4.0CH03:61345341]	3	13	44
SL4.0ch03	61394395	MantaBND:211084:0:1:0:0:0:1	SL4.0CH12	5723767	BND	C	C[SL4.0CH12:5723767[	3	0	57
SL4.0ch03	62264164	MantaBND:250277:0:1:0:0:0:0	SL4.0CH12	58791381	BND	A	[SL4.0CH12:58791381[A	2	0	58
SL4.0ch03	63510747	MantaBND:250980:0:1:0:1:0:1	SL4.0CH09	2262342	BND	G	]SL4.0CH09:2262342]GG	1	0	59
SL4.0ch03	64908566	MantaBND:250640:3:4:0:0:0:1	SL4.0CH09	51469265	BND	G	]SL4.0CH09:51469265]G,]SL4.0CH09:51469266]G	1	0	59
SL4.0ch03	65298404	MantaBND:192453:0:1:0:0:0:0	SL4.0CH07	67883541	BND	T	T]SL4.0CH07:67883541]	1	0	59
SL4.0ch03	65298490	MantaBND:243217:0:1:0:0:0:0	SL4.0CH07	67883646	BND	T	T]SL4.0CH07:67883646]	10	1	49
SL4.0ch04	61213	MantaBND:143:5095:5100:0:0:0:0	SL4.0CH12	43931269	BND	G	[SL4.0CH12:43931269[G	1	0	59
SL4.0ch04	124372	MantaBND:252413:0:1:0:0:0:0	SL4.0CH08	61152882	BND	T	T]SL4.0CH08:61152882]	1	0	59
SL4.0ch04	2573308	MantaBND:274877:0:1:0:0:0:0	SL4.0CH04	6720597	BND	G	[SL4.0CH04:6720597[G	1	0	59
SL4.0ch04	2573327	MantaBND:215576:0:1:0:0:0:0	SL4.0CH04	6720622	BND	A	[SL4.0CH04:6720622[A	1	0	59
SL4.0ch04	2588327	MantaBND:274758:0:1:1:0:0:0	SL4.0CH11	4704588	BND	G	GA]SL4.0CH11:4704588]	1	0	59
SL4.0ch04	2592020	MantaBND:274971:0:1:1:1:0:1	SL4.0CH11	4700868	BND	T	[SL4.0CH11:4700868[T	4	1	55
SL4.0ch04	3377251	MantaBND:255166:0:1:0:0:0:1	SL4.0CH04	3378689	BND	A	ATAA]SL4.0CH04:3378689]	0	3	57
SL4.0ch04	3378338	MantaBND:143043:2:4:0:0:0:0	SL4.0CH04	3378899	BND	C	[SL4.0CH04:3378899[C	0	1	59
SL4.0ch04	3378362	MantaBND:255166:1:2:0:1:0:0	SL4.0CH04	3378885	BND	T	[SL4.0CH04:3378885[T	0	2	58
SL4.0ch04	3378689	MantaBND:255166:0:1:0:0:0:0	SL4.0CH04	3377251	BND	T	TTTA]SL4.0CH04:3377251]	0	3	57
SL4.0ch04	3378884	MantaBND:255166:1:2:0:1:0:1	SL4.0CH04	3378363	BND	A	[SL4.0CH04:3378363[A	0	2	58
SL4.0ch04	3378899	MantaBND:143043:2:4:0:0:0:1	SL4.0CH04	3378338	BND	C	[SL4.0CH04:3378338[C	0	1	59
SL4.0ch04	3524660	MantaBND:43653:0:1:0:0:0:0	SL4.0CH01	28631418	BND	C	C[SL4.0CH01:28631418[	1	0	59
SL4.0ch04	3557148	MantaBND:174425:1:1:0:0:0:0	SL4.0CH04	3557439	BND	G	G]SL4.0CH04:3557439]	1	0	59
SL4.0ch04	3557153	MantaBND:165875:2:2:0:0:0:0	SL4.0CH04	3557439	BND	A	A]SL4.0CH04:3557439]	1	0	59
SL4.0ch04	3557439	MantaBND:174425:1:1:0:0:0:1	SL4.0CH04	3557148	BND	A	A]SL4.0CH04:3557148]	1	0	59
SL4.0ch04	3557439	MantaBND:165875:2:2:0:0:0:1	SL4.0CH04	3557153	BND	A	A]SL4.0CH04:3557153]	1	0	59
SL4.0ch04	3883306	MantaBND:255717:0:2:0:0:0:1	SL4.0CH04	3928000	BND	A	[SL4.0CH04:3928000[A	0	2	58
SL4.0ch04	3927999	MantaBND:255717:0:2:0:0:0:0	SL4.0CH04	3883307	BND	T	[SL4.0CH04:3883307[T	0	2	58
SL4.0ch04	4646235	MantaBND:256774:0:2:0:0:0:0	SL4.0CH10	33347792	BND	C	]SL4.0CH10:33347792]CAC	4	0	56
SL4.0ch04	5296844	MantaBND:33146:19:20:0:0:0:0	SL4.0CH12	62568449	BND	A	]SL4.0CH12:62568449]A	1	0	59
SL4.0ch04	5296850	MantaBND:257967:0:1:0:0:0:0	SL4.0CH12	62568441	BND	T	]SL4.0CH12:62568441]T	1	0	59
SL4.0ch04	5297194	MantaBND:32:3315:3317:1:0:0:0	SL4.0CH05	8281977	BND	G	G[SL4.0CH05:8281977[	1	0	59
SL4.0ch04	5306196	MantaBND:26:7201:7202:0:0:0:0	SL4.0CH03	48870360	BND	A	[SL4.0CH03:48870360[A	1	0	59
SL4.0ch04	5306218	MantaBND:239581:0:1:0:0:0:0	SL4.0CH03	48870355	BND	A	[SL4.0CH03:48870355[A	2	0	58
SL4.0ch04	5322356	MantaBND:257644:0:1:0:0:0:0	SL4.0CH04	7372851	BND	A	[SL4.0CH04:7372851[A	2	0	58
SL4.0ch04	5322365	MantaBND:218387:0:1:0:0:0:0	SL4.0CH04	7372766	BND	A	[SL4.0CH04:7372766[A,[SL4.0CH04:7372761[A	1	0	57
SL4.0ch04	5322383	MantaBND:278475:0:1:0:0:0:0	SL4.0CH04	7372776	BND	T	[SL4.0CH04:7372776[T	2	0	58
SL4.0ch04	6013420	MantaBND:248639:0:1:0:1:0:1	SL4.0CH03	57688386	BND	T	T[SL4.0CH03:57688386[	6	0	54
SL4.0ch04	6086883	MantaBND:90280:0:2:1:0:0:0	SL4.0CH01	67125658	BND	A	AAAT[SL4.0CH01:67125658[	1	0	59
SL4.0ch04	6720597	MantaBND:274877:0:1:0:0:0:1	SL4.0CH04	2573308	BND	A	[SL4.0CH04:2573308[A	1	0	59
SL4.0ch04	6720622	MantaBND:215576:0:1:0:0:0:1	SL4.0CH04	2573327	BND	A	[SL4.0CH04:2573327[A	1	0	59
SL4.0ch04	7372761	MantaBND:261533:0:1:0:0:0:1	SL4.0CH04	5322365	BND	A	[SL4.0CH04:5322365[A	2	0	58
SL4.0ch04	7372766	MantaBND:218387:0:1:0:0:0:1	SL4.0CH04	5322365	BND	A	[SL4.0CH04:5322365[A	1	0	59
SL4.0ch04	7372776	MantaBND:278475:0:1:0:0:0:1	SL4.0CH04	5322383	BND	A	[SL4.0CH04:5322383[A	2	0	58
SL4.0ch04	7372851	MantaBND:257644:0:1:0:0:0:1	SL4.0CH04	5322356	BND	T	[SL4.0CH04:5322356[T	2	0	58
SL4.0ch04	7451549	MantaBND:251208:0:1:0:0:0:1	SL4.0CH12	582711	BND	T	]SL4.0CH12:582711]T	1	0	59
SL4.0ch04	7481615	MantaBND:26:16866:16881:0:0:0:1	SL4.0CH02	40086347	BND	T	T[SL4.0CH02:40086347[	10	0	50
SL4.0ch04	7613056	MantaBND:28697:0:1:0:0:0:0	SL4.0CH04	7730861	BND	A	A]SL4.0CH04:7730861]	14	0	46
SL4.0ch04	7712445	MantaBND:162:28262:28263:0:0:0:1	SL4.0CH06	3229411	BND	A	[SL4.0CH06:3229411[A	1	0	59
SL4.0ch04	7730860	MantaBND:28697:0:1:0:0:0:1	SL4.0CH04	7613057	BND	T	T]SL4.0CH04:7613057]	14	0	46
SL4.0ch04	8012719	MantaBND:260962:0:1:0:0:0:0	SL4.0CH09	34431699	BND	C	C]SL4.0CH09:34431699]	2	0	58
SL4.0ch04	9357888	MantaBND:262403:0:1:0:1:0:1	SL4.0CH04	9393970	BND	A	A]SL4.0CH04:9393970]	1	10	49
SL4.0ch04	9375919	MantaBND:151:11103:11107:0:0:0:1	SL4.0CH04	9387651	BND	A	A]SL4.0CH04:9387651]	1	12	47
SL4.0ch04	9387648	MantaBND:151:11103:11107:0:0:0:0	SL4.0CH04	9375922	BND	T	T]SL4.0CH04:9375922]	1	12	47
SL4.0ch04	9387651	MantaBND:151:11103:11105:0:0:0:1	SL4.0CH04	9431179	BND	A	[SL4.0CH04:9431179[A	9	4	47
SL4.0ch04	9393970	MantaBND:262403:0:1:0:1:0:0	SL4.0CH04	9357888	BND	C	C]SL4.0CH04:9357888]	1	10	49
SL4.0ch04	9431176	MantaBND:151:11103:11105:0:0:0:0	SL4.0CH04	9387654	BND	T	[SL4.0CH04:9387654[T	9	4	47
SL4.0ch04	9808298	MantaBND:52616:51:61:0:0:0:1	SL4.0CH11	8030474	BND	A	[SL4.0CH11:8030474[GACCCAAA	11	1	48
SL4.0ch04	10181104	MantaBND:132728:1:3:0:0:0:0	SL4.0CH09	53312336	BND	A	A[SL4.0CH09:53312336[	1	0	59
SL4.0ch04	10510596	MantaBND:264367:0:1:0:0:0:0	SL4.0CH12	26242823	BND	C	C]SL4.0CH12:26242823]	5	0	55
SL4.0ch04	11739405	MantaBND:265517:0:5:0:0:0:1	SL4.0CH12	42480438	BND	G	[SL4.0CH12:42480438[G	2	0	58
SL4.0ch04	12301290	MantaBND:270351:0:1:1:0:0:1	SL4.0CH10	441720	BND	C	[SL4.0CH10:441720[C	1	0	59
SL4.0ch04	12301507	MantaBND:270351:0:1:0:0:0:1	SL4.0CH10	441825	BND	T	T]SL4.0CH10:441825]	1	0	59
SL4.0ch04	12303311	MantaBND:266727:0:1:0:0:0:1	SL4.0CH04	12335316	BND	A	ATATCAACTTTTTATTGAAACTGAATATATTA]SL4.0CH04:12335316]	2	20	38
SL4.0ch04	12328950	MantaBND:266796:0:2:0:0:0:0	SL4.0CH06	16829076	BND	T	T]SL4.0CH06:16829076]	1	0	59
SL4.0ch04	12335316	MantaBND:266727:0:1:0:0:0:0	SL4.0CH04	12303311	BND	A	ATAATATATTCAGTTTCAATAAAAAGTTGATA]SL4.0CH04:12303311]	2	20	38
SL4.0ch04	12662317	MantaBND:226214:0:1:0:0:0:0	SL4.0CH12	65617612	BND	T	[SL4.0CH12:65617612[T	1	0	59
SL4.0ch04	13495331	MantaBND:58:0:1:0:1:0:1	SL4.0CH00	90338	BND	A	A]SL4.0CH00:90338]	1	0	59
SL4.0ch04	13495691	MantaBND:83:0:1:0:0:0:1	SL4.0CH00	89833	BND	T	TAA]SL4.0CH00:89833]	2	2	56
SL4.0ch04	13591866	MantaBND:2272:0:1:0:0:0:0	SL4.0CH00	1315491	BND	G	[SL4.0CH00:1315491[GG	1	7	52
SL4.0ch04	14235457	MantaBND:259480:0:1:0:0:0:1	SL4.0CH04	14236237	BND	C	C]SL4.0CH04:14236237]	8	0	52
SL4.0ch04	14236237	MantaBND:259480:0:1:0:0:0:0	SL4.0CH04	14235457	BND	A	A]SL4.0CH04:14235457]	8	0	52
SL4.0ch04	14935271	MantaBND:260556:0:1:0:0:0:0	SL4.0CH04	28281913	BND	T	[SL4.0CH04:28281913[T	4	0	56
SL4.0ch04	14987143	MantaBND:292288:0:1:0:0:0:0	SL4.0CH04	28230195	BND	A	A]SL4.0CH04:28230195]	1	0	59
SL4.0ch04	15008680	MantaBND:260662:0:1:0:0:0:1	SL4.0CH04	28209944	BND	A	A]SL4.0CH04:28209944]	1	0	59
SL4.0ch04	16363713	MantaBND:26:20007:20011:0:0:0:1	SL4.0CH09	35488029	BND	C	]SL4.0CH09:35488029]C	3	0	57
SL4.0ch04	16954347	MantaBND:118915:2:6:0:0:0:0	SL4.0CH09	16555673	BND	A	]SL4.0CH09:16555673]A	1	0	59
SL4.0ch04	17175822	MantaBND:273542:0:3:0:0:0:0	SL4.0CH10	24192968	BND	A	[SL4.0CH10:24192968[A	13	0	47
SL4.0ch04	17485761	MantaBND:18839:1:6:0:0:0:0	SL4.0CH10	60785298	BND	A	[SL4.0CH10:60785298[A	3	1	56
SL4.0ch04	17622967	MantaBND:259382:0:1:0:0:0:1	SL4.0CH03	51279950	BND	C	C]SL4.0CH03:51279950]	4	0	56
SL4.0ch04	17726523	MantaBND:274708:0:1:0:0:0:0	SL4.0CH04	17792792	BND	T	TAGAGA]SL4.0CH04:17792792]	2	19	39
SL4.0ch04	17737990	MantaBND:274708:1:2:0:0:0:0	SL4.0CH04	17792809	BND	A	[SL4.0CH04:17792809[A	11	10	39
SL4.0ch04	17792557	MantaBND:274708:1:3:0:0:0:0	SL4.0CH04	17905762	BND	T	[SL4.0CH04:17905762[T	9	12	39
SL4.0ch04	17792792	MantaBND:274708:0:1:0:0:0:1	SL4.0CH04	17726523	BND	G	GTCTCT]SL4.0CH04:17726523]	2	19	39
SL4.0ch04	17792807	MantaBND:274708:1:2:0:0:0:1	SL4.0CH04	17737992	BND	T	[SL4.0CH04:17737992[T	11	10	39
SL4.0ch04	17905757	MantaBND:274708:1:3:0:0:0:1	SL4.0CH04	17792562	BND	A	[SL4.0CH04:17792562[A	9	12	39
SL4.0ch04	17917522	MantaBND:274890:1:1:1:0:0:1	SL4.0CH04	17917867	BND	A	A]SL4.0CH04:17917867]	2	19	39
SL4.0ch04	17917867	MantaBND:274890:1:1:1:0:0:0	SL4.0CH04	17917522	BND	C	C]SL4.0CH04:17917522]	2	19	39
SL4.0ch04	18273142	MantaBND:265830:0:1:1:0:0:0	SL4.0CH12	45315295	BND	A	A[SL4.0CH12:45315295[	8	0	52
SL4.0ch04	18736251	MantaBND:298926:0:1:0:0:0:1	SL4.0CH10	8907178	BND	T	T[SL4.0CH10:8907178[	2	0	58
SL4.0ch04	18736252	MantaBND:279564:0:1:0:0:0:1	SL4.0CH10	8907205	BND	A	A[SL4.0CH10:8907205[	3	0	57
SL4.0ch04	18736252	MantaBND:211204:0:1:0:0:0:1	SL4.0CH10	8907210	BND	A	A[SL4.0CH10:8907210[	2	0	58
SL4.0ch04	18736252	MantaBND:266239:0:1:0:0:0:1	SL4.0CH10	8907199	BND	A	A[SL4.0CH10:8907199[	1	0	59
SL4.0ch04	18736283	MantaBND:276565:0:1:0:0:0:1	SL4.0CH10	8907163	BND	T	T[SL4.0CH10:8907163[	1	0	59
SL4.0ch04	18917170	MantaBND:52616:51:60:0:0:0:1	SL4.0CH11	8030474	BND	A	[SL4.0CH11:8030474[GACCCAAA	11	0	49
SL4.0ch04	19378786	MantaBND:244873:1:3:0:0:0:0	SL4.0CH08	55761286	BND	A	]SL4.0CH08:55761286]A	1	0	59
SL4.0ch04	19623771	MantaBND:239077:5:7:0:0:0:0	SL4.0CH08	25044119	BND	T	T[SL4.0CH08:25044119[	1	0	59
SL4.0ch04	20267879	MantaBND:301230:1:2:0:0:0:1	SL4.0CH11	14898316	BND	G	]SL4.0CH11:14898316]G	1	0	59
SL4.0ch04	20270688	MantaBND:116836:0:1:1:0:0:1	SL4.0CH01	90467616	BND	T	[SL4.0CH01:90467616[GTACGACCTAAGGCATAAAGAGGAT	6	0	54
SL4.0ch04	20271126	MantaBND:116836:0:1:0:1:0:1	SL4.0CH01	90467618	BND	C	CGCATA]SL4.0CH01:90467618]	4	3	53
SL4.0ch04	21015047	MantaBND:283181:0:1:0:1:0:1	SL4.0CH09	10606068	BND	C	]SL4.0CH09:10606068]C	1	0	59
SL4.0ch04	21929627	MantaBND:122461:7:9:0:1:0:1	SL4.0CH06	24995698	BND	G	G]SL4.0CH06:24995698]	8	0	52
SL4.0ch04	23055091	MantaBND:155947:1:2:0:0:0:0	SL4.0CH05	24226922	BND	A	A]SL4.0CH05:24226922]	1	0	59
SL4.0ch04	24813274	MantaBND:288751:0:1:0:0:0:1	SL4.0CH07	48535319	BND	A	A[SL4.0CH07:48535319[	1	0	59
SL4.0ch04	25662140	MantaBND:286476:1:7:0:0:0:0	SL4.0CH08	37430565	BND	A	[SL4.0CH08:37430565[A	1	0	59
SL4.0ch04	26254817	MantaBND:151:14684:14695:0:0:0:1	SL4.0CH09	53936822	BND	T	]SL4.0CH09:53936822]T	2	0	58
SL4.0ch04	26798137	MantaBND:311525:0:1:1:1:0:0	SL4.0CH04	26816472	BND	A	[SL4.0CH04:26816472[A	0	3	57
SL4.0ch04	26798139	MantaBND:288035:0:1:0:0:0:0	SL4.0CH04	26816471	BND	T	T]SL4.0CH04:26816471]	0	13	47
SL4.0ch04	26798162	MantaBND:277202:0:1:1:0:0:0	SL4.0CH04	26816456	BND	T	[SL4.0CH04:26816456[T	1	0	59
SL4.0ch04	26816456	MantaBND:277202:0:1:1:0:0:1	SL4.0CH04	26798162	BND	T	[SL4.0CH04:26798162[T	1	0	59
SL4.0ch04	26816466	MantaBND:288035:0:1:0:0:0:1	SL4.0CH04	26798144	BND	T	T]SL4.0CH04:26798144]	0	13	47
SL4.0ch04	26816467	MantaBND:311525:0:1:1:1:0:1	SL4.0CH04	26798142	BND	A	[SL4.0CH04:26798142[A	0	3	57
SL4.0ch04	28209944	MantaBND:260662:0:1:0:0:0:0	SL4.0CH04	15008680	BND	G	G]SL4.0CH04:15008680]	1	0	59
SL4.0ch04	28230189	MantaBND:292288:0:1:0:0:0:1	SL4.0CH04	14987149	BND	G	G]SL4.0CH04:14987149]	1	0	59
SL4.0ch04	28281899	MantaBND:260556:0:1:0:0:0:1	SL4.0CH04	14935285	BND	T	[SL4.0CH04:14935285[T	4	0	56
SL4.0ch04	28474678	MantaBND:44790:0:1:0:0:0:1	SL4.0CH01	34963064	BND	A	[SL4.0CH01:34963064[A	1	0	59
SL4.0ch04	29239573	MantaBND:103334:0:1:0:0:0:1	SL4.0CH01	76105953	BND	G	]SL4.0CH01:76105953]AG	1	0	59
SL4.0ch04	29804757	MantaBND:123:11726:11729:0:0:0:0	SL4.0CH06	30454572	BND	T	]SL4.0CH06:30454572]T	1	0	59
SL4.0ch04	30310519	MantaBND:188492:6:7:0:0:0:1	SL4.0CH07	60725868	BND	T	[SL4.0CH07:60725868[ATT	1	0	59
SL4.0ch04	30775270	MantaBND:146161:0:1:0:0:0:0	SL4.0CH02	20063880	BND	A	]SL4.0CH02:20063880]CTTATA	3	0	57
SL4.0ch04	30831466	MantaBND:26:22179:22187:0:0:0:1	SL4.0CH07	60797957	BND	A	A]SL4.0CH07:60797957]	2	0	58
SL4.0ch04	31020639	MantaBND:96014:0:1:0:0:0:1	SL4.0CH02	5408007	BND	T	T[SL4.0CH02:5408007[	2	0	58
SL4.0ch04	31020640	MantaBND:126264:0:1:0:0:0:1	SL4.0CH02	5408007	BND	A	A[SL4.0CH02:5408007[	3	0	57
SL4.0ch04	31020669	MantaBND:124615:0:1:0:0:0:1	SL4.0CH02	5408004	BND	G	G[SL4.0CH02:5408004[	3	0	57
SL4.0ch04	31020674	MantaBND:133598:0:1:0:0:0:1	SL4.0CH02	5407973	BND	G	G[SL4.0CH02:5407973[	2	0	58
SL4.0ch04	31020685	MantaBND:120563:0:1:0:0:0:1	SL4.0CH02	5407982	BND	C	C[SL4.0CH02:5407982[	1	0	59
SL4.0ch04	31397148	MantaBND:282977:0:1:0:0:0:1	SL4.0CH07	34776137	BND	A	[SL4.0CH07:34776137[A	1	0	59
SL4.0ch04	35376432	MantaBND:63554:0:1:0:0:0:0	SL4.0CH01	42641604	BND	T	[SL4.0CH01:42641604[T	3	0	57
SL4.0ch04	35771927	MantaBND:228618:0:1:0:0:0:1	SL4.0CH12	42380753	BND	A	[SL4.0CH12:42380753[A	1	0	59
SL4.0ch04	38750675	MantaBND:82898:1:2:0:0:0:1	SL4.0CH04	40568553	BND	C	C]SL4.0CH04:40568553]	8	0	52
SL4.0ch04	39276981	MantaBND:26:28549:28556:0:0:0:1	SL4.0CH05	31034351	BND	A	[SL4.0CH05:31034351[A	1	0	59
SL4.0ch04	40568544	MantaBND:82898:1:2:0:0:0:0	SL4.0CH04	38750684	BND	C	C]SL4.0CH04:38750684]	8	0	52
SL4.0ch04	40770288	MantaBND:307675:0:1:0:0:0:0	SL4.0CH04	40773678	BND	G	G]SL4.0CH04:40773678]	2	19	39
SL4.0ch04	40770289	MantaBND:307675:0:2:0:0:0:1	SL4.0CH04	40790372	BND	T	[SL4.0CH04:40790372[T	13	8	39
SL4.0ch04	40773677	MantaBND:307675:0:1:0:0:0:1	SL4.0CH04	40770289	BND	C	C]SL4.0CH04:40770289]	2	19	39
SL4.0ch04	40790370	MantaBND:307675:0:2:0:0:0:0	SL4.0CH04	40770291	BND	A	[SL4.0CH04:40770291[A	13	8	39
SL4.0ch04	40951152	MantaBND:15356:3:4:0:0:0:0	SL4.0CH10	2295992	BND	T	T]SL4.0CH10:2295992]	3	0	57
SL4.0ch04	40951173	MantaBND:81390:6:7:0:0:0:1	SL4.0CH10	2295989	BND	A	A]SL4.0CH10:2295989]	1	0	59
SL4.0ch04	40951180	MantaBND:74545:3:4:0:0:0:1	SL4.0CH10	2295989	BND	A	A]SL4.0CH10:2295989]	1	0	59
SL4.0ch04	40951184	MantaBND:65445:10:11:0:0:0:0	SL4.0CH10	2295990	BND	T	T]SL4.0CH10:2295990]	1	0	59
SL4.0ch04	40951186	MantaBND:26:29047:29049:0:0:0:1	SL4.0CH10	2295994	BND	A	A]SL4.0CH10:2295994]	1	0	59
SL4.0ch04	41069868	MantaBND:307784:0:3:0:0:0:0	SL4.0CH08	34196803	BND	A	AAGG[SL4.0CH08:34196803[	21	0	39
SL4.0ch04	41070016	MantaBND:307784:0:1:0:0:0:1	SL4.0CH05	54592325	BND	A	]SL4.0CH05:54592325]A	18	3	39
SL4.0ch04	41790441	MantaBND:151:18968:18973:0:0:0:0	SL4.0CH08	36873047	BND	A	[SL4.0CH08:36873047[ATCTATAGTGGCGGGTCTATCTTCTTCTGGGCGAGCTGCGGAGCAACTTTTTCTTTCTTTCATTCCA	20	0	40
SL4.0ch04	41982596	MantaBND:309160:0:1:0:0:0:1	SL4.0CH06	44604385	BND	T	T]SL4.0CH06:44604385]	1	0	59
SL4.0ch04	41982636	MantaBND:334851:0:1:0:0:0:1	SL4.0CH06	44604391	BND	T	T]SL4.0CH06:44604391]	2	0	58
SL4.0ch04	42877081	MantaBND:235998:0:1:0:0:0:0	SL4.0CH11	48314877	BND	A	]SL4.0CH11:48314877]A	2	0	58
SL4.0ch04	42877083	MantaBND:261620:0:1:0:0:0:0	SL4.0CH11	48314877	BND	A	]SL4.0CH11:48314877]A	1	0	59
SL4.0ch04	42877092	MantaBND:150350:10:12:0:0:0:0	SL4.0CH11	48314877	BND	A	]SL4.0CH11:48314877]A	2	0	58
SL4.0ch04	42877104	MantaBND:312408:0:1:0:0:0:0	SL4.0CH11	48314876	BND	T	]SL4.0CH11:48314876]T	2	0	58
SL4.0ch04	42877134	MantaBND:215693:1:2:0:0:0:0	SL4.0CH11	48314870	BND	G	]SL4.0CH11:48314870]G	3	0	57
SL4.0ch04	42878482	MantaBND:215693:2:3:0:0:0:1	SL4.0CH11	48314906	BND	A	A[SL4.0CH11:48314906[	4	0	56
SL4.0ch04	42878482	MantaBND:261620:1:2:0:0:0:1	SL4.0CH11	48314899	BND	A	A[SL4.0CH11:48314899[	2	0	58
SL4.0ch04	42878519	MantaBND:26:28906:28922:0:0:0:1	SL4.0CH11	48315011	BND	T	T[SL4.0CH11:48315011[	1	0	59
SL4.0ch04	43986540	MantaBND:17118:14:21:0:0:0:0	SL4.0CH05	54847930	BND	A	[SL4.0CH05:54847930[A	1	0	59
SL4.0ch04	45181969	MantaBND:300534:0:1:0:0:0:0	SL4.0CH12	26310514	BND	C	C[SL4.0CH12:26310514[	1	0	59
SL4.0ch04	46892108	MantaBND:14941:3:6:2:3:0:0	SL4.0CH12	50260775	BND	C	C]SL4.0CH12:50260775]	4	0	56
SL4.0ch04	46892162	MantaBND:14941:3:6:0:0:0:0	SL4.0CH12	50259482	BND	A	[SL4.0CH12:50259482[A	2	0	58
SL4.0ch04	46892166	MantaBND:213380:6:9:0:0:0:0	SL4.0CH12	50259481	BND	T	[SL4.0CH12:50259481[T	2	0	58
SL4.0ch04	46892181	MantaBND:198036:3:4:0:0:0:0	SL4.0CH12	50259484	BND	C	[SL4.0CH12:50259484[C,[SL4.0CH12:50259479[C	2	0	52
SL4.0ch04	46965697	MantaBND:162:21089:21093:0:1:0:1	SL4.0CH06	23953486	BND	C	C[SL4.0CH06:23953486[	5	0	55
SL4.0ch04	47175502	MantaBND:316109:0:0:0:0:0:0	SL4.0CH04	47175893	BND	T	T]SL4.0CH04:47175893]	2	19	39
SL4.0ch04	47175510	MantaBND:316109:0:1:0:0:0:0	SL4.0CH04	47179053	BND	T	[SL4.0CH04:47179053[T	7	3	50
SL4.0ch04	47175891	MantaBND:316109:0:0:0:0:0:1	SL4.0CH04	47175504	BND	T	T]SL4.0CH04:47175504]	2	19	39
SL4.0ch04	47179051	MantaBND:316109:0:1:0:0:0:1	SL4.0CH04	47175512	BND	A	[SL4.0CH04:47175512[A	7	3	50
SL4.0ch04	47218033	MantaBND:316455:1:2:0:0:0:0	SL4.0CH11	48460962	BND	T	[SL4.0CH11:48460962[T	28	1	31
SL4.0ch04	47297372	MantaBND:154712:4:5:0:0:0:1	SL4.0CH09	4401410	BND	A	]SL4.0CH09:4401410]A	1	0	59
SL4.0ch04	48714824	MantaBND:16280:9:10:0:0:0:0	SL4.0CH11	52349188	BND	A	A]SL4.0CH11:52349188]	1	6	53
SL4.0ch04	48714824	MantaBND:16280:8:9:0:0:0:1	SL4.0CH01	77770595	BND	A	AAATCTCCACC[SL4.0CH01:77770595[	0	1	59
SL4.0ch04	49159144	MantaBND:306039:0:2:0:0:0:0	SL4.0CH04	55928217	BND	T	[SL4.0CH04:55928217[T	1	0	59
SL4.0ch04	49173993	MantaBND:320918:0:3:0:0:0:0	SL4.0CH12	31243295	BND	T	TA[SL4.0CH12:31243295[	3	0	57
SL4.0ch04	49345300	MantaBND:19837:15:16:0:0:0:0	SL4.0CH02	48285292	BND	C	C]SL4.0CH02:48285292]	8	0	52
SL4.0ch04	49815201	MantaBND:5009:1:2:0:0:0:1	SL4.0CH11	8030473	BND	T	]SL4.0CH11:8030473]T	9	0	51
SL4.0ch04	49988300	MantaBND:320426:1:2:0:0:0:0	SL4.0CH09	68229562	BND	C	C]SL4.0CH09:68229562]	1	0	59
SL4.0ch04	49988300	MantaBND:306922:1:2:0:0:0:0	SL4.0CH09	68229565	BND	C	C]SL4.0CH09:68229565]	1	0	59
SL4.0ch04	51768892	MantaBND:39707:2:7:0:0:0:1	SL4.0CH10	17134425	BND	T	[SL4.0CH10:17134425[T	1	0	59
SL4.0ch04	52509938	MantaBND:309312:0:1:0:0:0:0	SL4.0CH11	10319616	BND	C	C[SL4.0CH11:10319616[	1	0	59
SL4.0ch04	52668500	MantaBND:322847:0:1:0:0:0:1	SL4.0CH06	21966012	BND	T	]SL4.0CH06:21966012]T,]SL4.0CH06:21966029]T	1	0	58
SL4.0ch04	52668516	MantaBND:349664:0:1:0:0:0:1	SL4.0CH06	21965935	BND	A	]SL4.0CH06:21965935]A	3	0	57
SL4.0ch04	52705345	MantaBND:169618:0:1:0:0:0:0	SL4.0CH02	43623440	BND	A	]SL4.0CH02:43623440]A	9	0	51
SL4.0ch04	52834921	MantaBND:104579:0:1:0:0:0:1	SL4.0CH01	77310637	BND	A	A]SL4.0CH01:77310637]	1	0	59
SL4.0ch04	53257104	MantaBND:162:16017:16025:0:0:0:1	SL4.0CH08	9140504	BND	G	]SL4.0CH08:9140504]G	1	0	59
SL4.0ch04	53376082	MantaINS:14089:33:33:0:3:0	SL4.0CH06	16496007	BND	G	<INS>,GT[SL4.0CH06:16496007[	1	12	41
SL4.0ch04	53376082	MantaBND:162:2513:10041:0:0:0:0	SL4.0CH06	16496007	BND	G	GT[SL4.0CH06:16496007[	0	4	56
SL4.0ch04	54281190	MantaBND:326372:0:1:1:0:0:0	SL4.0CH05	20446974	BND	C	]SL4.0CH05:20446974]C	3	0	57
SL4.0ch04	54281193	MantaBND:273458:0:1:1:0:0:0	SL4.0CH05	20446964	BND	G	]SL4.0CH05:20446964]G	6	0	54
SL4.0ch04	54281195	MantaBND:324555:0:1:1:0:0:0	SL4.0CH05	20446954	BND	A	]SL4.0CH05:20446954]A,]SL4.0CH05:20446960]A	2	0	56
SL4.0ch04	54281207	MantaBND:246944:0:1:1:0:0:0	SL4.0CH05	20446956	BND	A	]SL4.0CH05:20446956]A	8	0	52
SL4.0ch04	54281219	MantaBND:351540:0:1:1:0:0:0	SL4.0CH05	20446966	BND	A	]SL4.0CH05:20446966]A	3	0	57
SL4.0ch04	54438230	MantaBND:26:278:279:0:0:0:0	SL4.0CH10	40507831	BND	T	[SL4.0CH10:40507831[T	1	0	59
SL4.0ch04	54672636	MantaBND:180257:0:1:0:0:0:1	SL4.0CH03	47318985	BND	T	T[SL4.0CH03:47318985[	1	0	59
SL4.0ch04	54806534	MantaBND:142092:3:4:0:4:0:1	SL4.0CH03	28416223	BND	T	T[SL4.0CH03:28416223[	18	0	42
SL4.0ch04	54854144	MantaBND:247494:0:1:0:2:0:0	SL4.0CH04	62367495	BND	A	A]SL4.0CH04:62367495]	1	0	59
SL4.0ch04	54866945	MantaBND:143:12556:12560:0:0:0:1	SL4.0CH03	47148245	BND	T	T[SL4.0CH03:47148245[	1	0	59
SL4.0ch04	54903752	MantaBND:123:4731:4736:0:1:0:0	SL4.0CH03	46267393	BND	A	]SL4.0CH03:46267393]A	3	0	57
SL4.0ch04	54962167	MantaBND:190255:0:1:0:0:0:0	SL4.0CH03	15582364	BND	A	A[SL4.0CH03:15582364[	1	0	59
SL4.0ch04	55209588	MantaBND:327592:0:1:0:0:0:0	SL4.0CH07	58597281	BND	C	]SL4.0CH07:58597281]C	1	0	59
SL4.0ch04	55227245	MantaBND:151:3784:4611:0:0:0:0	SL4.0CH03	57645975	BND	T	]SL4.0CH03:57645975]TACAGT	57	0	3
SL4.0ch04	55227275	MantaBND:151:3784:4610:0:0:0:0	SL4.0CH03	57644752	BND	C	C[SL4.0CH03:57644752[	6	0	54
SL4.0ch04	55228901	MantaBND:143:4944:4946:0:0:0:1	SL4.0CH03	56291365	BND	T	[SL4.0CH03:56291365[T	1	0	59
SL4.0ch04	55607678	MantaBND:26:6028:6031:0:5:0:0	SL4.0CH05	18534065	BND	C	C]SL4.0CH05:18534065]	5	0	55
SL4.0ch04	55928217	MantaBND:306039:0:2:0:0:0:1	SL4.0CH04	49159144	BND	T	[SL4.0CH04:49159144[T	1	0	59
SL4.0ch04	56067507	MantaBND:275188:0:1:1:0:0:0	SL4.0CH04	56069009	BND	T	[SL4.0CH04:56069009[TTTTGATT	3	0	57
SL4.0ch04	56067571	MantaBND:275188:0:1:0:0:0:0	SL4.0CH04	56069069	BND	G	G]SL4.0CH04:56069069]	1	0	59
SL4.0ch04	56067571	MantaBND:248741:0:1:0:0:0:0	SL4.0CH04	56069100	BND	G	G]SL4.0CH04:56069100]	1	0	59
SL4.0ch04	56067573	MantaBND:328533:0:1:0:0:0:0	SL4.0CH04	56069072	BND	T	T]SL4.0CH04:56069072]	2	0	58
SL4.0ch04	56069009	MantaBND:275188:0:1:1:0:0:1	SL4.0CH04	56067507	BND	T	[SL4.0CH04:56067507[ATCAAAAT	3	0	57
SL4.0ch04	56069069	MantaBND:275188:0:1:0:0:0:1	SL4.0CH04	56067571	BND	A	A]SL4.0CH04:56067571]	1	0	59
SL4.0ch04	56069072	MantaBND:328533:0:1:0:0:0:1	SL4.0CH04	56067573	BND	A	A]SL4.0CH04:56067573]	2	0	58
SL4.0ch04	56069100	MantaBND:248741:0:1:0:0:0:1	SL4.0CH04	56067571	BND	A	A]SL4.0CH04:56067571]	1	0	59
SL4.0ch04	56221308	MantaBND:26:13810:13811:0:0:0:0	SL4.0CH09	2392600	BND	C	C]SL4.0CH09:2392600]	1	0	59
SL4.0ch04	56941675	MantaBND:74545:2:3:0:0:0:1	SL4.0CH10	2295652	BND	A	A[SL4.0CH10:2295652[	7	1	52
SL4.0ch04	56941675	MantaBND:81390:1:6:0:0:0:1	SL4.0CH10	2295650	BND	A	A[SL4.0CH10:2295650[	2	0	58
SL4.0ch04	56941691	MantaBND:65445:11:15:0:0:0:1	SL4.0CH10	2295634	BND	A	A[SL4.0CH10:2295634[	7	0	53
SL4.0ch04	56941703	MantaBND:101816:12:17:0:0:0:1	SL4.0CH10	2295622	BND	A	A[SL4.0CH10:2295622[	3	0	57
SL4.0ch04	56941706	MantaBND:15356:1:4:0:0:0:1	SL4.0CH10	2295619	BND	C	C[SL4.0CH10:2295619[	6	0	54
SL4.0ch04	56941715	MantaBND:26:29038:29047:0:0:0:1	SL4.0CH10	2295612	BND	G	G[SL4.0CH10:2295612[	1	0	59
SL4.0ch04	57633315	MantaBND:109395:1:2:0:0:0:1	SL4.0CH09	7895669	BND	C	[SL4.0CH09:7895669[C	1	0	59
SL4.0ch04	58163988	MantaBND:162:14688:14689:0:1:0:1	SL4.0CH06	22100428	BND	A	]SL4.0CH06:22100428]A	5	0	55
SL4.0ch04	58273033	MantaBND:55564:1:3:0:0:0:1	SL4.0CH05	44722591	BND	A	[SL4.0CH05:44722591[A	32	2	26
SL4.0ch04	58281355	MantaBND:328700:0:2:0:0:0:0	SL4.0CH08	46402649	BND	G	[SL4.0CH08:46402649[G	27	0	33
SL4.0ch04	58281363	MantaBND:328700:0:1:0:2:0:0	SL4.0CH08	46403651	BND	T	T]SL4.0CH08:46403651]	20	0	40
SL4.0ch04	58321356	MantaBND:10555:23:26:0:0:0:0	SL4.0CH06	181130	BND	T	]SL4.0CH06:181130]T	17	1	42
SL4.0ch04	58508162	MantaBND:356260:0:0:3:0:0:0	SL4.0CH04	58508219	BND	T	T]SL4.0CH04:58508219]	2	0	58
SL4.0ch04	58508219	MantaBND:356260:0:0:3:0:0:1	SL4.0CH04	58508162	BND	T	T]SL4.0CH04:58508162]	2	0	58
SL4.0ch04	59039390	MantaBND:225357:0:1:0:0:0:1	SL4.0CH03	25608972	BND	T	]SL4.0CH03:25608972]T	1	0	59
SL4.0ch04	59041999	MantaBND:63963:2:12:0:0:0:0	SL4.0CH02	12416254	BND	T	]SL4.0CH02:12416254]T	6	0	54
SL4.0ch04	59042004	MantaBND:112356:0:13:0:0:0:0	SL4.0CH02	12416272	BND	G	]SL4.0CH02:12416272]G,]SL4.0CH02:12416273]G,]SL4.0CH02:12416246]G,]SL4.0CH02:12416248]G,]SL4.0CH02:12416227]G	2	0	48
SL4.0ch04	59042319	MantaBND:112356:12:15:0:0:0:1	SL4.0CH12	27584145	BND	T	T]SL4.0CH12:27584145]	3	0	57
SL4.0ch04	59042319	MantaBND:102980:3:4:0:0:0:1	SL4.0CH12	27584187	BND	T	T]SL4.0CH12:27584187]	2	0	58
SL4.0ch04	59181769	MantaBND:329682:0:1:0:1:0:0	SL4.0CH07	46662051	BND	C	CC[SL4.0CH07:46662051[	1	0	59
SL4.0ch04	59225930	MantaBND:316576:0:1:0:0:0:1	SL4.0CH10	2048328	BND	A	A]SL4.0CH10:2048328]	1	0	59
SL4.0ch04	59225936	MantaBND:331861:0:2:0:3:0:1	SL4.0CH10	2048082	BND	A	[SL4.0CH10:2048082[AAA	6	0	54
SL4.0ch04	59225950	MantaBND:278174:0:1:1:0:0:1	SL4.0CH10	2048018	BND	A	[SL4.0CH10:2048018[A	6	0	54
SL4.0ch04	59225954	MantaBND:329854:0:1:0:0:0:1	SL4.0CH10	2048272	BND	G	G]SL4.0CH10:2048272]	42	1	17
SL4.0ch04	59225956	MantaBND:357219:0:2:0:0:0:1	SL4.0CH10	2048018	BND	A	[SL4.0CH10:2048018[A	5	0	55
SL4.0ch04	59225997	MantaBND:329854:0:2:0:0:0:1	SL4.0CH10	2048018	BND	A	[SL4.0CH10:2048018[A	6	0	54
SL4.0ch04	59226014	MantaBND:316576:0:2:0:0:0:1	SL4.0CH10	2048018	BND	A	[SL4.0CH10:2048018[A	3	0	57
SL4.0ch04	59354517	MantaBND:332186:0:1:0:0:0:0	SL4.0CH10	16729427	BND	A	A[SL4.0CH10:16729427[	1	0	59
SL4.0ch04	59563209	MantaBND:32:9882:9883:0:0:0:0	SL4.0CH06	397182	BND	A	AC[SL4.0CH06:397182[	16	1	43
SL4.0ch04	59817238	MantaBND:330550:0:1:0:0:0:0	SL4.0CH05	47814123	BND	C	[SL4.0CH05:47814123[C	1	0	59
SL4.0ch04	59845220	MantaBND:83645:0:1:0:0:0:1	SL4.0CH01	61141585	BND	T	T[SL4.0CH01:61141585[	1	0	59
SL4.0ch04	60575407	MantaBND:281147:1:6:0:0:0:0	SL4.0CH05	26296176	BND	T	T]SL4.0CH05:26296176]	1	0	59
SL4.0ch04	61602844	MantaBND:184508:0:1:0:0:0:1	SL4.0CH03	6158539	BND	C	[SL4.0CH03:6158539[C,[SL4.0CH03:6158548[C	2	0	57
SL4.0ch04	61602846	MantaBND:188501:0:1:0:0:0:1	SL4.0CH03	6158540	BND	G	[SL4.0CH03:6158540[G	1	0	59
SL4.0ch04	61738364	MantaBND:151:5861:6114:0:0:0:0	SL4.0CH07	62323265	BND	G	]SL4.0CH07:62323265]G	1	0	59
SL4.0ch04	61738390	MantaBND:162:2750:9012:0:0:0:0	SL4.0CH07	62323251	BND	C	]SL4.0CH07:62323251]C	3	0	57
SL4.0ch04	62367494	MantaBND:247494:0:1:0:2:0:1	SL4.0CH04	54854145	BND	C	C]SL4.0CH04:54854145]	1	0	59
SL4.0ch04	62708818	MantaBND:254239:0:1:1:0:0:0	SL4.0CH07	61019771	BND	T	[SL4.0CH07:61019771[T	1	0	59
SL4.0ch04	62709133	MantaBND:254239:0:1:0:0:0:0	SL4.0CH07	61019793	BND	T	T]SL4.0CH07:61019793]	1	0	59
SL4.0ch04	63602939	MantaBND:82278:0:1:0:0:0:1	SL4.0CH01	53557873	BND	G	G[SL4.0CH01:53557873[	2	0	58
SL4.0ch04	63602986	MantaBND:64380:0:1:0:0:0:1	SL4.0CH01	53557876	BND	A	A[SL4.0CH01:53557876[	2	0	58
SL4.0ch04	63602995	MantaBND:77756:1:2:0:0:0:1	SL4.0CH01	53557861	BND	A	A[SL4.0CH01:53557861[	1	0	59
SL4.0ch04	63603012	MantaBND:64380:1:2:0:0:0:1	SL4.0CH01	53561338	BND	A	]SL4.0CH01:53561338]AAAA	6	2	52
SL4.0ch04	64211545	MantaBND:10894:1:2:0:0:0:0	SL4.0CH03	29818055	BND	A	A[SL4.0CH03:29818055[	2	0	58
SL4.0ch04	64211560	MantaBND:11275:1:2:0:0:0:0	SL4.0CH03	29818066	BND	A	A[SL4.0CH03:29818066[	1	0	59
SL4.0ch04	64459972	MantaBND:321739:0:1:0:0:0:0	SL4.0CH06	47258699	BND	G	G]SL4.0CH06:47258699]	8	0	52
SL4.0ch05	1	MantaBND:321908:0:1:0:0:0:1	SL4.0CH08	63995357	BND	C	]SL4.0CH08:63995357]C	4	1	55
SL4.0ch05	105	MantaBND:334507:0:1:0:0:0:1	SL4.0CH08	63995243	BND	A	]SL4.0CH08:63995243]A	2	0	58
SL4.0ch05	1755093	MantaBND:178094:1:2:0:0:0:1	SL4.0CH05	1778836	BND	C	C]SL4.0CH05:1778836]	1	0	59
SL4.0ch05	1778836	MantaBND:178094:1:2:0:0:0:0	SL4.0CH05	1755093	BND	T	T]SL4.0CH05:1755093]	1	0	59
SL4.0ch05	2242765	MantaBND:97253:0:1:0:0:0:1	SL4.0CH01	90336457	BND	G	]SL4.0CH01:90336457]TG	1	0	59
SL4.0ch05	3446235	MantaBND:365197:0:1:1:2:0:0	SL4.0CH06	1764670	BND	G	G]SL4.0CH06:1764670]	3	0	57
SL4.0ch05	4324535	MantaBND:338149:0:1:0:0:0:1	SL4.0CH09	59900059	BND	G	G[SL4.0CH09:59900059[	1	0	59
SL4.0ch05	4898713	MantaBND:115529:8:9:0:0:0:0	SL4.0CH09	57711365	BND	A	[SL4.0CH09:57711365[A	1	0	59
SL4.0ch05	5029763	MantaBND:84466:2:5:0:0:0:1	SL4.0CH01	73364304	BND	A	]SL4.0CH01:73364304]GAATAGATTGAAGTGAAGGAACTGTGAACATTGAAACAGCATGCACATTAAACCTGA,]SL4.0CH09:66607561]A	1	0	57
SL4.0ch05	5505990	MantaBND:234401:1:2:0:0:0:1	SL4.0CH06	24756654	BND	A	[SL4.0CH06:24756654[A	1	0	59
SL4.0ch05	6720670	MantaBND:327748:0:1:0:0:0:1	SL4.0CH05	6720853	BND	A	[SL4.0CH05:6720853[A	1	0	59
SL4.0ch05	6720853	MantaBND:327748:0:1:0:0:0:0	SL4.0CH05	6720670	BND	T	[SL4.0CH05:6720670[T	1	0	59
SL4.0ch05	8127124	MantaBND:151:4928:4929:0:0:0:0	SL4.0CH08	60864021	BND	C	C]SL4.0CH08:60864021]	9	0	51
SL4.0ch05	8183616	MantaBND:145748:1:4:0:0:0:0	SL4.0CH03	54546160	BND	A	]SL4.0CH03:54546160]A	1	0	59
SL4.0ch05	8281977	MantaBND:32:3315:3317:1:0:0:1	SL4.0CH04	5297194	BND	A	]SL4.0CH04:5297194]A	1	0	59
SL4.0ch05	8522872	MantaBND:89206:1:5:0:0:0:1	SL4.0CH12	66180299	BND	G	G[SL4.0CH12:66180299[	1	0	59
SL4.0ch05	8522874	MantaBND:20814:1:4:0:0:0:1	SL4.0CH12	66180297	BND	A	A[SL4.0CH12:66180297[	1	0	59
SL4.0ch05	10325715	MantaBND:151:14285:14286:0:0:0:1	SL4.0CH08	408015	BND	A	A]SL4.0CH08:408015]	1	0	59
SL4.0ch05	10325768	MantaBND:151:14286:14287:0:0:0:0	SL4.0CH02	31756509	BND	T	T]SL4.0CH02:31756509]	2	0	58
SL4.0ch05	10325777	MantaBND:162:11552:11558:0:0:0:0	SL4.0CH02	31756513	BND	T	T]SL4.0CH02:31756513]	3	0	57
SL4.0ch05	10474526	MantaBND:343868:0:1:0:0:0:1	SL4.0CH05	10476120	BND	T	T]SL4.0CH05:10476120]	0	3	57
SL4.0ch05	10474532	MantaBND:343868:0:1:1:0:0:0	SL4.0CH05	10476126	BND	T	[SL4.0CH05:10476126[T	2	1	57
SL4.0ch05	10476118	MantaBND:343868:0:1:0:0:0:0	SL4.0CH05	10474528	BND	C	C]SL4.0CH05:10474528]	0	3	57
SL4.0ch05	10476124	MantaBND:343868:0:1:1:0:0:1	SL4.0CH05	10474534	BND	A	[SL4.0CH05:10474534[A	2	1	57
SL4.0ch05	11537034	MantaBND:41763:4:5:0:0:0:1	SL4.0CH12	63898845	BND	T	TCCGCATTTTTATTGTAATAGTTAAGTTTTAGGCTTACTTGTCTTGGTGGGATAAGACGAGTGCCATCACGTCCATTTTTGGGTCGTGAC[SL4.0CH12:63898845[	1	0	59
SL4.0ch05	11716628	MantaBND:21923:1:2:0:0:0:1	SL4.0CH11	19697521	BND	A	[SL4.0CH11:19697521[A	1	0	59
SL4.0ch05	12080010	MantaBND:264264:0:0:4:0:0:0	SL4.0CH05	12080211	BND	G	G]SL4.0CH05:12080211]	1	0	59
SL4.0ch05	12080208	MantaBND:264264:0:0:4:0:0:1	SL4.0CH05	12080013	BND	A	A]SL4.0CH05:12080013]	1	0	59
SL4.0ch05	12196130	MantaBND:248144:1:2:0:0:0:1	SL4.0CH11	5039825	BND	T	[SL4.0CH11:5039825[T	34	0	26
SL4.0ch05	14287929	MantaBND:348834:0:1:0:0:0:0	SL4.0CH05	14295550	BND	A	A]SL4.0CH05:14295550]	0	4	56
SL4.0ch05	14295550	MantaBND:348834:0:1:0:0:0:1	SL4.0CH05	14287929	BND	A	A]SL4.0CH05:14287929]	0	4	56
SL4.0ch05	14355198	MantaBND:343867:1:2:0:0:0:0	SL4.0CH05	14361671	BND	T	[SL4.0CH05:14361671[T	0	3	57
SL4.0ch05	14361662	MantaBND:343867:1:2:0:0:0:1	SL4.0CH05	14355207	BND	T	[SL4.0CH05:14355207[T	0	3	57
SL4.0ch05	15222755	MantaBND:26:32509:32510:0:0:0:0	SL4.0CH12	55504358	BND	T	[SL4.0CH12:55504358[T	11	0	49
SL4.0ch05	15629365	MantaBND:337889:0:1:0:3:0:1	SL4.0CH11	37099525	BND	A	AA]SL4.0CH11:37099525]	1	0	59
SL4.0ch05	16134311	MantaBND:32424:1:4:0:0:0:1	SL4.0CH12	36744970	BND	T	[SL4.0CH12:36744970[T	1	0	59
SL4.0ch05	16204874	MantaBND:351719:0:1:0:0:0:0	SL4.0CH05	16213272	BND	T	TAAGTTG]SL4.0CH05:16213272]	1	2	57
SL4.0ch05	16213272	MantaBND:351719:0:1:0:0:0:1	SL4.0CH05	16204874	BND	T	TCAACTT]SL4.0CH05:16204874]	1	2	57
SL4.0ch05	16339460	MantaBND:233973:1:3:0:0:0:0	SL4.0CH10	35750670	BND	G	[SL4.0CH10:35750670[GGAAGAG	3	0	57
SL4.0ch05	16922290	MantaBND:352743:0:1:0:0:0:0	SL4.0CH05	16923000	BND	G	[SL4.0CH05:16923000[TAATACTAAATGTAGCTAG	0	3	57
SL4.0ch05	16923000	MantaBND:352743:0:1:0:0:0:1	SL4.0CH05	16922290	BND	T	[SL4.0CH05:16922290[TAGCTACATTTAGTATTAT	0	3	57
SL4.0ch05	17088983	MantaBND:105923:0:1:0:0:0:1	SL4.0CH02	15292187	BND	A	[SL4.0CH02:15292187[A	1	0	59
SL4.0ch05	17534172	MantaBND:353364:0:2:0:0:0:1	SL4.0CH09	33678959	BND	T	[SL4.0CH09:33678959[T	1	0	59
SL4.0ch05	17562698	MantaBND:353479:0:1:0:0:0:0	SL4.0CH05	33315702	BND	G	G]SL4.0CH05:33315702]	1	0	59
SL4.0ch05	18534064	MantaBND:26:6028:6031:0:5:0:1	SL4.0CH04	55607679	BND	C	C]SL4.0CH04:55607679]	5	0	55
SL4.0ch05	18556159	MantaBND:271739:0:1:0:0:0:1	SL4.0CH06	41541980	BND	A	[SL4.0CH06:41541980[A	2	0	58
SL4.0ch05	19727279	MantaBND:44855:0:1:0:0:0:1	SL4.0CH01	37933015	BND	T	T]SL4.0CH01:37933015]	1	0	59
SL4.0ch05	20148205	MantaBND:273234:1:3:0:0:0:1	SL4.0CH07	62215056	BND	T	T[SL4.0CH07:62215056[	1	0	59
SL4.0ch05	20446954	MantaBND:324555:0:1:1:0:0:1	SL4.0CH04	54281195	BND	T	T[SL4.0CH04:54281195[	2	0	58
SL4.0ch05	20446956	MantaBND:246944:0:1:1:0:0:1	SL4.0CH04	54281207	BND	T	T[SL4.0CH04:54281207[	8	0	52
SL4.0ch05	20446960	MantaBND:311339:0:1:1:0:0:1	SL4.0CH04	54281195	BND	C	C[SL4.0CH04:54281195[	2	0	58
SL4.0ch05	20446964	MantaBND:273458:0:1:1:0:0:1	SL4.0CH04	54281193	BND	A	A[SL4.0CH04:54281193[	6	0	54
SL4.0ch05	20446966	MantaBND:351540:0:1:1:0:0:1	SL4.0CH04	54281219	BND	C	C[SL4.0CH04:54281219[	3	0	57
SL4.0ch05	20446974	MantaBND:326372:0:1:1:0:0:1	SL4.0CH04	54281190	BND	G	G[SL4.0CH04:54281190[	3	0	57
SL4.0ch05	20510622	MantaBND:134914:1:2:0:0:0:0	SL4.0CH11	52953278	BND	G	[SL4.0CH11:52953278[G	1	0	59
SL4.0ch05	20753460	MantaBND:387643:0:1:0:0:0:1	SL4.0CH11	10703992	BND	C	[SL4.0CH11:10703992[C	4	0	56
SL4.0ch05	22235643	MantaBND:96175:0:1:0:0:0:0	SL4.0CH01	63159967	BND	C	]SL4.0CH01:63159967]C	1	0	59
SL4.0ch05	22413213	MantaBND:94908:1:4:0:0:0:0	SL4.0CH06	3859788	BND	A	[SL4.0CH06:3859788[A	2	0	58
SL4.0ch05	24226922	MantaBND:155947:1:2:0:0:0:1	SL4.0CH04	23055091	BND	A	A]SL4.0CH04:23055091]	1	0	59
SL4.0ch05	24876679	MantaBND:278152:0:1:0:0:0:0	SL4.0CH11	22954790	BND	T	T[SL4.0CH11:22954790[	1	0	59
SL4.0ch05	26206787	MantaBND:365229:0:1:0:0:0:1	SL4.0CH05	26207283	BND	G	G]SL4.0CH05:26207283]	0	3	57
SL4.0ch05	26206811	MantaBND:351071:0:0:2:0:0:1	SL4.0CH05	26207332	BND	A	[SL4.0CH05:26207332[A	1	0	59
SL4.0ch05	26207259	MantaBND:365229:0:1:0:0:0:0	SL4.0CH05	26206811	BND	T	T]SL4.0CH05:26206811]	0	3	57
SL4.0ch05	26207303	MantaBND:351071:0:0:2:0:0:0	SL4.0CH05	26206840	BND	A	[SL4.0CH05:26206840[A	1	0	59
SL4.0ch05	26296176	MantaBND:281147:1:6:0:0:0:1	SL4.0CH04	60575407	BND	A	A]SL4.0CH04:60575407]	1	0	59
SL4.0ch05	26661425	MantaBND:366277:0:1:0:0:0:0	SL4.0CH05	26668610	BND	A	[SL4.0CH05:26668610[A	2	0	58
SL4.0ch05	26668610	MantaBND:366277:0:1:0:0:0:1	SL4.0CH05	26661425	BND	A	[SL4.0CH05:26661425[A	2	0	58
SL4.0ch05	28608718	MantaBND:32:17386:17387:0:0:0:1	SL4.0CH03	16205271	BND	C	[SL4.0CH03:16205271[C	1	0	59
SL4.0ch05	29248362	MantaBND:355181:0:1:0:2:0:1	SL4.0CH12	23423015	BND	A	A[SL4.0CH12:23423015[	1	0	59
SL4.0ch05	29788606	MantaBND:370561:0:1:0:1:0:0	SL4.0CH05	29792433	BND	C	C]SL4.0CH05:29792433]	0	3	57
SL4.0ch05	29788653	MantaBND:370561:0:1:1:0:0:0	SL4.0CH05	29792442	BND	C	[SL4.0CH05:29792442[C	1	2	57
SL4.0ch05	29792432	MantaBND:370561:0:1:0:1:0:1	SL4.0CH05	29788607	BND	T	T]SL4.0CH05:29788607]	0	3	57
SL4.0ch05	29792442	MantaBND:370561:0:1:1:0:0:1	SL4.0CH05	29788653	BND	T	[SL4.0CH05:29788653[T	1	2	57
SL4.0ch05	29870026	MantaBND:23472:0:1:0:0:0:1	SL4.0CH01	11381408	BND	C	C]SL4.0CH01:11381408]	1	0	59
SL4.0ch05	30850990	MantaBND:284618:0:1:0:0:0:1	SL4.0CH09	26641886	BND	A	A]SL4.0CH09:26641886]	1	0	59
SL4.0ch05	31034351	MantaBND:26:28549:28556:0:0:0:0	SL4.0CH04	39276981	BND	A	[SL4.0CH04:39276981[A	1	0	59
SL4.0ch05	33002801	MantaBND:143:18061:18075:0:4:0:0	SL4.0CH09	61590568	BND	T	]SL4.0CH09:61590568]T	3	0	57
SL4.0ch05	33315702	MantaBND:353479:0:1:0:0:0:1	SL4.0CH05	17562698	BND	A	A]SL4.0CH05:17562698]	1	0	59
SL4.0ch05	33619787	MantaBND:375787:0:1:0:0:0:0	SL4.0CH08	23107934	BND	A	A]SL4.0CH08:23107934]	3	0	57
SL4.0ch05	33730524	MantaBND:148142:1:3:0:0:0:1	SL4.0CH05	34169582	BND	A	A]SL4.0CH05:34169582]	0	3	57
SL4.0ch05	34079652	MantaBND:376142:0:1:0:0:0:1	SL4.0CH05	34124500	BND	A	[SL4.0CH05:34124500[A	0	3	57
SL4.0ch05	34098567	MantaBND:376449:0:1:0:1:0:0	SL4.0CH12	14971247	BND	A	AT[SL4.0CH12:14971247[	1	0	59
SL4.0ch05	34124499	MantaBND:376142:0:1:0:0:0:0	SL4.0CH05	34079653	BND	T	[SL4.0CH05:34079653[T	0	3	57
SL4.0ch05	34169578	MantaBND:148142:1:3:0:0:0:0	SL4.0CH05	33730528	BND	A	A]SL4.0CH05:33730528]	0	3	57
SL4.0ch05	34197330	MantaBND:12012:12:21:1:0:0:1	SL4.0CH05	34199614	BND	C	[SL4.0CH05:34199614[C	0	3	57
SL4.0ch05	34199614	MantaBND:12012:12:21:1:0:0:0	SL4.0CH05	34197330	BND	C	[SL4.0CH05:34197330[C	0	3	57
SL4.0ch05	34930206	MantaBND:151:18660:18662:0:0:0:1	SL4.0CH05	34931195	BND	T	[SL4.0CH05:34931195[T	2	1	57
SL4.0ch05	34931195	MantaBND:151:18660:18662:0:0:0:0	SL4.0CH05	34930206	BND	T	[SL4.0CH05:34930206[T	2	1	57
SL4.0ch05	35085475	MantaBND:289069:0:1:0:0:0:1	SL4.0CH11	34167728	BND	C	]SL4.0CH11:34167728]C	1	0	59
SL4.0ch05	35157443	MantaBND:151:15828:15837:0:0:0:1	SL4.0CH01	80808610	BND	T	]SL4.0CH01:80808610]AGGAAT	16	0	44
SL4.0ch05	35165043	MantaBND:26:14007:14018:0:0:0:0	SL4.0CH07	60408009	BND	C	C]SL4.0CH07:60408009]	5	0	55
SL4.0ch05	39566638	MantaBND:383919:0:1:0:0:0:1	SL4.0CH05	39568732	BND	A	[SL4.0CH05:39568732[A	2	1	57
SL4.0ch05	39566789	MantaBND:293723:2:3:0:0:0:0	SL4.0CH05	40538373	BND	A	AAATTATGAAAAGAAAAGATGT]SL4.0CH05:40538373]	1	0	59
SL4.0ch05	39568731	MantaBND:383919:0:1:0:0:0:0	SL4.0CH05	39566639	BND	T	[SL4.0CH05:39566639[T	2	1	57
SL4.0ch05	39913620	MantaBND:384274:0:1:0:0:0:0	SL4.0CH05	39923928	BND	T	T]SL4.0CH05:39923928]	3	0	57
SL4.0ch05	39923926	MantaBND:384274:0:1:0:0:0:1	SL4.0CH05	39913622	BND	T	T]SL4.0CH05:39913622]	3	0	57
SL4.0ch05	40384250	MantaBND:325221:0:1:0:3:0:1	SL4.0CH11	26255399	BND	A	[SL4.0CH11:26255399[A	1	0	59
SL4.0ch05	40538373	MantaBND:293723:2:3:0:0:0:1	SL4.0CH05	39566789	BND	C	CACATCTTTTCTTTTCATAATT]SL4.0CH05:39566789]	1	0	59
SL4.0ch05	41852269	MantaBND:47053:1:2:0:1:0:0	SL4.0CH09	9301153	BND	A	]SL4.0CH09:9301153]TGCA	3	0	57
SL4.0ch05	42930727	MantaBND:387708:1:2:0:0:0:1	SL4.0CH05	42933634	BND	A	[SL4.0CH05:42933634[A	3	0	57
SL4.0ch05	42930896	MantaBND:387708:0:2:0:0:0:1	SL4.0CH05	42933700	BND	C	C]SL4.0CH05:42933700]	3	0	57
SL4.0ch05	42933630	MantaBND:387708:1:2:0:0:0:0	SL4.0CH05	42930731	BND	A	[SL4.0CH05:42930731[A	3	0	57
SL4.0ch05	42933695	MantaBND:387708:0:2:0:0:0:0	SL4.0CH05	42930901	BND	A	A]SL4.0CH05:42930901]	3	0	57
SL4.0ch05	44722589	MantaBND:55564:1:3:0:0:0:0	SL4.0CH04	58273035	BND	A	[SL4.0CH04:58273035[A	32	2	26
SL4.0ch05	45443430	MantaBND:391911:0:1:0:0:0:1	SL4.0CH10	61283047	BND	A	[SL4.0CH10:61283047[GAAA	1	0	59
SL4.0ch05	45994404	MantaBND:300020:0:1:0:0:0:1	SL4.0CH05	45995415	BND	A	[SL4.0CH05:45995415[A	1	0	59
SL4.0ch05	45995411	MantaBND:300020:0:1:0:0:0:0	SL4.0CH05	45994408	BND	T	[SL4.0CH05:45994408[T	1	0	59
SL4.0ch05	46003435	MantaBND:394024:0:1:0:0:0:0	SL4.0CH12	20841131	BND	T	[SL4.0CH12:20841131[T	1	0	59
SL4.0ch05	47814123	MantaBND:330550:0:1:0:0:0:1	SL4.0CH04	59817238	BND	T	[SL4.0CH04:59817238[T	1	0	59
SL4.0ch05	49987150	MantaBND:151:16213:16214:0:0:0:0	SL4.0CH12	45806853	BND	C	]SL4.0CH12:45806853]C	8	0	52
SL4.0ch05	49987161	MantaBND:123:14428:14439:0:0:0:0	SL4.0CH12	45806842	BND	G	]SL4.0CH12:45806842]G,]SL4.0CH12:45806772]G,]SL4.0CH12:45806757]G	11	0	36
SL4.0ch05	50544870	MantaBND:336286:0:1:0:0:0:0	SL4.0CH06	35405533	BND	C	C]SL4.0CH06:35405533]	1	0	59
SL4.0ch05	53071290	MantaBND:80817:2:3:0:0:0:1	SL4.0CH06	32131299	BND	C	]SL4.0CH06:32131299]C	1	0	59
SL4.0ch05	53929648	MantaBND:402647:0:1:0:2:0:1	SL4.0CH10	11379039	BND	A	[SL4.0CH10:11379039[A	1	0	59
SL4.0ch05	54592325	MantaBND:307784:0:1:0:0:0:0	SL4.0CH04	41070016	BND	T	T[SL4.0CH04:41070016[	18	3	39
SL4.0ch05	54847930	MantaBND:17118:14:21:0:0:0:1	SL4.0CH04	43986540	BND	A	[SL4.0CH04:43986540[A	1	0	59
SL4.0ch05	55010576	MantaBND:309173:0:1:0:0:0:1	SL4.0CH05	55155748	BND	A	[SL4.0CH05:55155748[A	0	1	59
SL4.0ch05	55155747	MantaBND:309173:0:1:0:0:0:0	SL4.0CH05	55010577	BND	T	[SL4.0CH05:55010577[T	0	1	59
SL4.0ch05	56109007	MantaBND:388533:0:1:0:0:0:0	SL4.0CH09	67130871	BND	A	[SL4.0CH09:67130871[TAAAAGAAATAAGAAAATCTTGCCTTTCCACAAACGGGACA	1	0	59
SL4.0ch05	56635728	MantaBND:117802:0:1:0:0:0:0	SL4.0CH01	84179650	BND	C	C]SL4.0CH01:84179650]	1	0	59
SL4.0ch05	59180430	MantaBND:151:5501:5504:0:0:0:1	SL4.0CH05	59181022	BND	C	C]SL4.0CH05:59181022]	1	0	59
SL4.0ch05	59180469	MantaBND:151:5501:5504:1:0:0:1	SL4.0CH05	59181043	BND	T	[SL4.0CH05:59181043[T	1	0	59
SL4.0ch05	59181022	MantaBND:151:5501:5504:0:0:0:0	SL4.0CH05	59180430	BND	T	T]SL4.0CH05:59180430]	1	0	59
SL4.0ch05	59181043	MantaBND:151:5501:5504:1:0:0:0	SL4.0CH05	59180469	BND	A	[SL4.0CH05:59180469[A	1	0	59
SL4.0ch05	59252707	MantaBND:391845:0:1:0:0:0:0	SL4.0CH05	62792996	BND	G	G]SL4.0CH05:62792996]	1	0	59
SL4.0ch05	59648387	MantaBND:409651:0:1:0:0:0:0	SL4.0CH09	50635515	BND	A	A[SL4.0CH09:50635515[	28	2	30
SL4.0ch05	59650011	MantaBND:409340:0:1:0:2:0:1	SL4.0CH09	50646517	BND	A	]SL4.0CH09:50646517]A	31	5	24
SL4.0ch05	60098394	MantaBND:151:12668:12669:0:0:0:1	SL4.0CH01	82488809	BND	G	]SL4.0CH01:82488809]CG	2	0	58
SL4.0ch05	60236309	MantaBND:138437:4:5:0:0:0:0	SL4.0CH06	905925	BND	A	ACT]SL4.0CH06:905925]	1	0	59
SL4.0ch05	60256842	MantaBND:346257:0:1:0:2:0:1	SL4.0CH05	60262884	BND	A	A]SL4.0CH05:60262884]	1	0	59
SL4.0ch05	60262884	MantaBND:346257:0:1:0:2:0:0	SL4.0CH05	60256842	BND	T	T]SL4.0CH05:60256842]	1	0	59
SL4.0ch05	60316635	MantaBND:346357:0:1:0:0:0:0	SL4.0CH08	31356538	BND	A	A]SL4.0CH08:31356538]	1	0	59
SL4.0ch05	60487173	MantaBND:151:5574:5587:0:5:0:0	SL4.0CH03	46267399	BND	T	T]SL4.0CH03:46267399]	38	0	22
SL4.0ch05	60487174	MantaBND:123:4733:4763:0:0:0:1	SL4.0CH10	58585103	BND	T	[SL4.0CH10:58585103[AGCGGGTCCGATTCAAGGCATTCAACAT	9	0	51
SL4.0ch05	60806491	MantaBND:193172:0:2:0:0:0:1	SL4.0CH03	10587453	BND	T	T[SL4.0CH03:10587453[	1	0	59
SL4.0ch05	60996479	MantaBND:410765:0:1:0:1:0:0	SL4.0CH12	30436356	BND	G	G]SL4.0CH12:30436356]	1	0	59
SL4.0ch05	61940529	MantaBND:26:7655:7736:0:2:0:0	SL4.0CH02	29271658	BND	T	T]SL4.0CH02:29271658]	3	0	57
SL4.0ch05	62561940	MantaBND:74251:2:3:0:0:0:1	SL4.0CH09	5121883	BND	C	C]SL4.0CH09:5121883]	1	0	59
SL4.0ch05	62604160	MantaBND:26:13973:13977:1:0:0:0	SL4.0CH11	46343871	BND	A	]SL4.0CH11:46343871]A	1	0	59
SL4.0ch05	62604164	MantaBND:151:10608:10610:0:0:0:1	SL4.0CH11	46339345	BND	C	C[SL4.0CH11:46339345[	3	2	55
SL4.0ch05	62686850	MantaBND:123:4689:4690:0:0:0:1	SL4.0CH06	36693526	BND	G	G]SL4.0CH06:36693526]	7	0	53
SL4.0ch05	62792996	MantaBND:391845:0:1:0:0:0:1	SL4.0CH05	59252707	BND	G	G]SL4.0CH05:59252707]	1	0	59
SL4.0ch05	63369991	MantaBND:143:7589:7593:0:0:0:0	SL4.0CH03	3715552	BND	A	A]SL4.0CH03:3715552]	1	0	59
SL4.0ch05	63829406	MantaBND:349775:0:0:4:0:0:0	SL4.0CH05	63829569	BND	A	ATATGTCTAAA]SL4.0CH05:63829569]	2	4	54
SL4.0ch05	63829569	MantaBND:349775:0:0:4:0:0:1	SL4.0CH05	63829406	BND	T	TTTTAGACATA]SL4.0CH05:63829406]	2	4	54
SL4.0ch05	64672956	MantaBND:317642:0:1:1:0:0:1	SL4.0CH05	64673696	BND	A	[SL4.0CH05:64673696[A	1	0	59
SL4.0ch05	64672966	MantaBND:31729:0:1:0:0:0:1	SL4.0CH05	64673729	BND	C	C]SL4.0CH05:64673729]	3	2	55
SL4.0ch05	64672970	MantaBND:31729:0:1:1:1:0:0	SL4.0CH05	64673728	BND	G	[SL4.0CH05:64673728[TAACG	4	2	54
SL4.0ch05	64673696	MantaBND:317642:0:1:1:0:0:0	SL4.0CH05	64672956	BND	A	[SL4.0CH05:64672956[A	1	0	59
SL4.0ch05	64673727	MantaBND:31729:0:1:0:0:0:0	SL4.0CH05	64672968	BND	T	T]SL4.0CH05:64672968]	3	2	55
SL4.0ch05	64673728	MantaBND:31729:0:1:1:1:0:1	SL4.0CH05	64672970	BND	T	[SL4.0CH05:64672970[GTTAT	4	2	54
SL4.0ch06	181130	MantaBND:10555:23:26:0:0:0:1	SL4.0CH04	58321356	BND	C	C[SL4.0CH04:58321356[	17	1	42
SL4.0ch06	342686	MantaBND:143:10182:10437:0:0:0:1	SL4.0CH01	87469761	BND	C	C[SL4.0CH01:87469761[	7	0	53
SL4.0ch06	397182	MantaBND:32:9882:9883:0:0:0:1	SL4.0CH04	59563209	BND	G	]SL4.0CH04:59563209]CG	16	1	43
SL4.0ch06	475084	MantaBND:351530:0:1:0:1:0:0	SL4.0CH09	5964462	BND	T	[SL4.0CH09:5964462[T	1	0	59
SL4.0ch06	703862	MantaBND:398812:0:0:13:0:0:0	SL4.0CH06	704131	BND	G	[SL4.0CH06:704131[G	0	1	59
SL4.0ch06	704131	MantaBND:398812:0:0:13:0:0:1	SL4.0CH06	703862	BND	T	[SL4.0CH06:703862[T	0	1	59
SL4.0ch06	726926	MantaBND:162:9704:9708:0:0:0:1	SL4.0CH01	30427263	BND	G	[SL4.0CH01:30427263[G	1	0	59
SL4.0ch06	805130	MantaBND:139997:1:2:0:0:0:1	SL4.0CH06	805801	BND	A	A]SL4.0CH06:805801]	0	5	55
SL4.0ch06	805800	MantaBND:139997:1:2:0:0:0:0	SL4.0CH06	805131	BND	T	T]SL4.0CH06:805131]	0	5	55
SL4.0ch06	901194	MantaBND:26:11570:11585:0:0:0:1	SL4.0CH06	1029481	BND	A	A]SL4.0CH06:1029481]	1	0	59
SL4.0ch06	905925	MantaBND:138437:4:5:0:0:0:1	SL4.0CH05	60236309,	BND	T	TAG]SL4.0CH05:60236309],TAGTTAGGCCTAAGACCTAATTTCACATGGTATCAGAGCAGGGCTCGTCTCACCCGATGTTGGGGTCCCCAAAATTAAAATTGCCCATGCACCAGATGCTAAGCACTGGGCGTGAGGTGGGGTGTTAAAGAATGACAAAAGTCCCACATCGGTGATTAATGAGATGGGTGGACTATTAATAAGGCTTGAGCAATCCTCCATCCTTTGAGCTAGCTTTTGGGGTGTGAGTTAGGCCTAAGACCTAATTTCACA	1	0	55
SL4.0ch06	973335	MantaBND:416409:0:1:0:0:0:0	SL4.0CH06	1971284	BND	T	T]SL4.0CH06:1971284]	1	0	59
SL4.0ch06	1029458	MantaBND:26:11570:11585:0:0:0:0	SL4.0CH06	901217	BND	T	T]SL4.0CH06:901217]	1	0	59
SL4.0ch06	1215320	MantaBND:151:3026:6146:0:1:0:0	SL4.0CH07	63425829	BND	T	T[SL4.0CH07:63425829[	4	18	38
SL4.0ch06	1764669	MantaBND:365197:0:1:1:2:0:1	SL4.0CH05	3446236	BND	A	A]SL4.0CH05:3446236]	3	0	57
SL4.0ch06	1971284	MantaBND:416409:0:1:0:0:0:1	SL4.0CH06	973335	BND	G	G]SL4.0CH06:973335]	1	0	59
SL4.0ch06	2326822	MantaBND:162:11479:11484:0:0:0:0	SL4.0CH02	45342315	BND	G	G[SL4.0CH02:45342315[	1	0	59
SL4.0ch06	2326838	MantaBND:151:6174:6176:0:0:0:1	SL4.0CH02	45342281	BND	C	C[SL4.0CH02:45342281[	1	0	59
SL4.0ch06	2328707	MantaBND:151:6155:6156:0:1:0:0	SL4.0CH06	2743129	BND	T	[SL4.0CH06:2743129[CCCTTGGTCGTCCACAACTTGGCTCTTCTATATAT	3	0	57
SL4.0ch06	2329661	MantaBND:151:6156:6158:1:0:0:1	SL4.0CH06	2743085	BND	A	AT]SL4.0CH06:2743085]	5	3	52
SL4.0ch06	2331092	MantaBND:26:8602:8626:0:2:0:1	SL4.0CH06	2742782	BND	C	[SL4.0CH06:2742782[C	5	1	54
SL4.0ch06	2343951	MantaBND:151:9371:9372:0:0:0:1	SL4.0CH09	9717666	BND	T	]SL4.0CH09:9717666]T	1	0	59
SL4.0ch06	2352190	MantaBND:23899:0:1:0:0:0:0	SL4.0CH06	2722644	BND	C	[SL4.0CH06:2722644[C	1	0	59
SL4.0ch06	2392398	MantaBND:96604:0:1:0:1:0:1	SL4.0CH01	69390314	BND	A	AATG[SL4.0CH01:69390314[	10	0	50
SL4.0ch06	2536031	MantaBND:162:11495:11498:0:0:0:0	SL4.0CH06	2744838	BND	A	[SL4.0CH06:2744838[A	0	4	56
SL4.0ch06	2536032	MantaBND:32:5617:5620:0:0:0:0	SL4.0CH06	2744850	BND	A	[SL4.0CH06:2744850[A	0	1	59
SL4.0ch06	2536033	MantaBND:151:6187:6190:0:0:0:0	SL4.0CH06	2744850	BND	C	[SL4.0CH06:2744850[C	1	2	57
SL4.0ch06	2536051	MantaBND:123:4909:4912:0:0:0:0	SL4.0CH06	2744854	BND	T	[SL4.0CH06:2744854[T	0	1	59
SL4.0ch06	2646936	MantaBND:419993:0:1:0:0:0:0	SL4.0CH10	31583279	BND	G	G[SL4.0CH10:31583279[	12	0	48
SL4.0ch06	2663218	MantaBND:419781:0:3:0:0:0:1	SL4.0CH10	5795334	BND	C	C[SL4.0CH10:5795334[	2	0	58
SL4.0ch06	2722644	MantaBND:23899:0:1:0:0:0:1	SL4.0CH06	2352190	BND	A	[SL4.0CH06:2352190[A	1	0	59
SL4.0ch06	2742750	MantaBND:26:8602:8626:0:2:0:0	SL4.0CH06	2331124	BND	T	[SL4.0CH06:2331124[T	5	1	54
SL4.0ch06	2742761	MantaBND:123:4886:4892:0:0:0:0	SL4.0CH11	12260127	BND	T	T[SL4.0CH11:12260127[	1	0	59
SL4.0ch06	2742761	MantaBND:32:5589:5597:0:0:0:0	SL4.0CH11	12260129	BND	T	T[SL4.0CH11:12260129[	1	0	59
SL4.0ch06	2742767	MantaBND:151:6156:6159:0:0:0:0	SL4.0CH11	12260129	BND	T	T[SL4.0CH11:12260129[	2	0	58
SL4.0ch06	2743085	MantaBND:151:6156:6158:1:0:0:0	SL4.0CH06	2329661	BND	C	CA]SL4.0CH06:2329661]	5	3	52
SL4.0ch06	2743129	MantaBND:151:6155:6156:0:1:0:1	SL4.0CH06	2328707	BND	C	[SL4.0CH06:2328707[TATATAGAAGAGCCAAGTTGTGGACGACCAAGGGC	3	0	57
SL4.0ch06	2744838	MantaBND:162:11495:11498:0:0:0:1	SL4.0CH06	2536031	BND	C	[SL4.0CH06:2536031[C	0	4	56
SL4.0ch06	2744850	MantaBND:151:6187:6190:0:0:0:1	SL4.0CH06	2536033	BND	C	[SL4.0CH06:2536033[C,[SL4.0CH06:2536032[C	1	2	56
SL4.0ch06	2744854	MantaBND:123:4909:4912:0:0:0:1	SL4.0CH06	2536051	BND	C	[SL4.0CH06:2536051[C	0	1	59
SL4.0ch06	2831419	MantaBND:122461:1:2:0:0:0:0	SL4.0CH02	21022255	BND	A	]SL4.0CH02:21022255]A	4	0	56
SL4.0ch06	2853982	MantaBND:454976:1:2:0:0:0:1	SL4.0CH09	54363155	BND	A	A]SL4.0CH09:54363155]	1	0	59
SL4.0ch06	2854016	MantaBND:420429:1:2:0:0:0:1	SL4.0CH09	54363147	BND	C	C]SL4.0CH09:54363147]	2	0	58
SL4.0ch06	2985205	MantaBND:455284:0:1:0:0:0:1	SL4.0CH09	67900265	BND	A	A[SL4.0CH09:67900265[	2	0	58
SL4.0ch06	2985345	MantaBND:455284:0:2:0:0:0:1	SL4.0CH09	67900581	BND	A	]SL4.0CH09:67900581]A	1	0	59
SL4.0ch06	3053134	MantaBND:177736:20:29:1:0:0:0	SL4.0CH09	5022280	BND	T	TTAT[SL4.0CH09:5022280[	2	0	58
SL4.0ch06	3053401	MantaBND:357105:0:1:0:0:0:0	SL4.0CH09	66198573	BND	A	A]SL4.0CH09:66198573]	7	0	53
SL4.0ch06	3067801	MantaBND:151:14407:14408:0:0:0:0	SL4.0CH08	10470462	BND	T	T[SL4.0CH08:10470462[	1	0	59
SL4.0ch06	3154073	MantaBND:320605:0:1:0:1:0:0	SL4.0CH03	12066329	BND	T	TCAA[SL4.0CH03:12066329[	3	0	57
SL4.0ch06	3229411	MantaBND:162:28262:28263:0:0:0:0	SL4.0CH04	7712445	BND	T	[SL4.0CH04:7712445[T	1	0	59
SL4.0ch06	3415373	MantaBND:173746:0:1:1:1:0:0	SL4.0CH03	99919	BND	C	[SL4.0CH03:99919[C	5	0	55
SL4.0ch06	3415381	MantaBND:162:2962:23913:0:5:0:0	SL4.0CH03	99917	BND	G	GG[SL4.0CH03:99917[	4	0	56
SL4.0ch06	3642075	MantaBND:162:27065:27066:0:0:0:1	SL4.0CH02	49600444	BND	T	TAGAAAAT[SL4.0CH02:49600444[	5	0	55
SL4.0ch06	3670779	MantaBND:151:4329:4363:0:0:0:0	SL4.0CH03	54145810	BND	A	[SL4.0CH03:54145810[A	2	0	58
SL4.0ch06	3670797	MantaBND:123:1560:1565:0:0:0:0	SL4.0CH03	54145810	BND	T	[SL4.0CH03:54145810[T	1	0	59
SL4.0ch06	3670858	MantaBND:162:16:8604:0:0:0:0	SL4.0CH03	54145806	BND	T	[SL4.0CH03:54145806[T	1	0	59
SL4.0ch06	3731091	MantaBND:177633:0:1:0:1:0:1	SL4.0CH02	52533186	BND	G	G]SL4.0CH02:52533186]	3	50	7
SL4.0ch06	3790137	MantaBND:113169:0:2:0:0:0:0	SL4.0CH01	86973383	BND	T	[SL4.0CH01:86973383[T	7	0	53
SL4.0ch06	3840549	MantaBND:352081:4:5:0:0:0:1	SL4.0CH12	50557017	BND	C	C[SL4.0CH12:50557017[	6	0	54
SL4.0ch06	3859788	MantaBND:94908:1:4:0:0:0:1	SL4.0CH05	22413213	BND	A	[SL4.0CH05:22413213[A	2	0	58
SL4.0ch06	4057871	MantaBND:162:9456:9481:0:0:0:0	SL4.0CH09	48977951	BND	T	[SL4.0CH09:48977951[ACAT	5	0	55
SL4.0ch06	4057871	MantaBND:162:9481:9490:0:0:0:0	SL4.0CH10	14533896	BND	T	]SL4.0CH10:14533896]T	5	0	55
SL4.0ch06	4177196	MantaBND:151:5848:5861:0:0:0:1	SL4.0CH07	62322907	BND	T	T[SL4.0CH07:62322907[	1	0	59
SL4.0ch06	4209284	MantaBND:151:4329:4365:0:0:0:0	SL4.0CH03	54145803	BND	T	T[SL4.0CH03:54145803[	1	0	59
SL4.0ch06	4578299	MantaBND:162:14293:14294:0:0:0:0	SL4.0CH01	46368238	BND	T	[SL4.0CH01:46368238[T	1	0	59
SL4.0ch06	4833959	MantaBND:71209:1:2:0:0:0:1	SL4.0CH08	26196957	BND	A	A[SL4.0CH08:26196957[	1	0	59
SL4.0ch06	4979983	MantaBND:162:12580:12695:0:1:0:0	SL4.0CH08	4779649	BND	T	]SL4.0CH08:4779649]CGGGTCT	5	0	55
SL4.0ch06	6606265	MantaBND:463187:0:1:0:0:0:0	SL4.0CH07	31914813	BND	A	A[SL4.0CH07:31914813[	2	0	58
SL4.0ch06	6768713	MantaBND:13866:4:11:0:0:0:0	SL4.0CH12	14621389	BND	C	]SL4.0CH12:14621389]C	1	0	59
SL4.0ch06	6858925	MantaBND:237042:3:4:0:0:0:0	SL4.0CH08	63977339	BND	T	]SL4.0CH08:63977339]TTGTATTGTTTTTAGAAGCTACAGCAATAGTAAT	8	0	52
SL4.0ch06	6858927	MantaBND:237042:3:4:1:5:0:1	SL4.0CH08	63977339	BND	A	]SL4.0CH08:63977339]TTGTATTGTTTTTAGAAGCTACAACAATAGTAATGA	1	0	59
SL4.0ch06	6933757	MantaBND:428247:1:2:0:0:0:0	SL4.0CH07	62446688	BND	A	A[SL4.0CH07:62446688[	1	0	59
SL4.0ch06	7269886	MantaBND:464794:0:2:0:0:0:0	SL4.0CH06	7270623	BND	A	[SL4.0CH06:7270623[A	5	0	55
SL4.0ch06	7270622	MantaBND:464794:0:2:0:0:0:1	SL4.0CH06	7269887	BND	T	[SL4.0CH06:7269887[T	5	0	55
SL4.0ch06	7287584	MantaBND:15326:57:58:0:2:0:0	SL4.0CH09	46857179	BND	T	T]SL4.0CH09:46857179]	5	0	55
SL4.0ch06	7346597	MantaBND:121073:8:11:0:0:0:1	SL4.0CH02	25722625	BND	A	A[SL4.0CH02:25722625[	1	0	59
SL4.0ch06	7363583	MantaBND:431017:3:4:0:0:0:0	SL4.0CH07	20565122	BND	T	T]SL4.0CH07:20565122]	1	0	59
SL4.0ch06	8624522	MantaBND:151:594:595:0:0:0:1	SL4.0CH02	11472563	BND	T	T[SL4.0CH02:11472563[	1	0	59
SL4.0ch06	8803528	MantaBND:32341:3:8:0:0:0:1	SL4.0CH09	34477593	BND	T	[SL4.0CH09:34477593[T	1	0	59
SL4.0ch06	9013852	MantaBND:334205:0:1:0:0:0:0	SL4.0CH06	9014979	BND	G	GATC]SL4.0CH06:9014979]	0	1	59
SL4.0ch06	9014979	MantaBND:334205:0:1:0:0:0:1	SL4.0CH06	9013852	BND	C	CGAT]SL4.0CH06:9013852]	0	1	59
SL4.0ch06	9234735	MantaBND:162:9859:9860:0:6:0:1	SL4.0CH07	15951482	BND	T	TTTTTTTTTTTTTTTTTTT[SL4.0CH07:15951482[	4	0	56
SL4.0ch06	9234835	MantaBND:162:9860:9864:0:0:0:0	SL4.0CH07	15959721	BND	A	]SL4.0CH07:15959721]A	1	0	59
SL4.0ch06	9708760	MantaBND:434340:0:1:0:1:0:0	SL4.0CH06	9777206	BND	T	TG]SL4.0CH06:9777206]	1	11	48
SL4.0ch06	9735234	MantaBND:162:23744:23745:0:0:0:0	SL4.0CH06	9793555	BND	T	[SL4.0CH06:9793555[T	0	5	55
SL4.0ch06	9777206	MantaBND:434340:0:1:0:1:0:1	SL4.0CH06	9708760	BND	T	TC]SL4.0CH06:9708760]	1	11	48
SL4.0ch06	9793555	MantaBND:162:23744:23745:0:0:0:1	SL4.0CH06	9735234	BND	A	[SL4.0CH06:9735234[A	0	5	55
SL4.0ch06	10092806	MantaBND:123:32:43:0:0:0:0	SL4.0CH00	1781086	BND	G	]SL4.0CH00:1781086]G	1	0	59
SL4.0ch06	10307939	MantaBND:435918:0:0:4:0:0:0	SL4.0CH06	10308216	BND	C	C]SL4.0CH06:10308216]	0	1	59
SL4.0ch06	10307955	MantaBND:435918:0:0:7:0:0:0	SL4.0CH06	10308619	BND	C	[SL4.0CH06:10308619[C	1	0	59
SL4.0ch06	10308216	MantaBND:435918:0:0:4:0:0:1	SL4.0CH06	10307939	BND	T	T]SL4.0CH06:10307939]	0	1	59
SL4.0ch06	10308619	MantaBND:435918:0:0:7:0:0:1	SL4.0CH06	10307955	BND	A	[SL4.0CH06:10307955[A	1	0	59
SL4.0ch06	10463164	MantaBND:229505:1:3:0:0:0:1	SL4.0CH11	21475187	BND	A	A[SL4.0CH11:21475187[	1	0	59
SL4.0ch06	11211488	MantaBND:248405:1:2:0:1:0:1	SL4.0CH03	60535961	BND	T	TTTTTTTTTTT]SL4.0CH03:60535961]	1	0	59
SL4.0ch06	11363297	MantaBND:162:11810:11811:0:0:0:0	SL4.0CH03	50480367	BND	A	]SL4.0CH03:50480367]A	1	0	59
SL4.0ch06	11439590	MantaBND:151:7603:7723:0:0:0:0	SL4.0CH07	28157123	BND	A	A[SL4.0CH07:28157123[	1	0	59
SL4.0ch06	11456969	MantaBND:337872:0:1:0:0:0:1	SL4.0CH06	11457179	BND	T	TCT]SL4.0CH06:11457179]	0	1	59
SL4.0ch06	11457011	MantaBND:337872:0:1:3:0:0:1	SL4.0CH06	11457288	BND	A	[SL4.0CH06:11457288[A	0	1	59
SL4.0ch06	11457179	MantaBND:337872:0:1:0:0:0:0	SL4.0CH06	11456969	BND	T	TAG]SL4.0CH06:11456969]	0	1	59
SL4.0ch06	11457284	MantaBND:337872:0:1:3:0:0:0	SL4.0CH06	11457015	BND	T	[SL4.0CH06:11457015[T	0	1	59
SL4.0ch06	11978189	MantaBND:151:4329:4342:0:0:0:0	SL4.0CH03	54145811	BND	A	A[SL4.0CH03:54145811[	1	0	59
SL4.0ch06	12619803	MantaBND:146786:1:3:0:0:0:1	SL4.0CH06	12620683	BND	T	TCAC]SL4.0CH06:12620683]	1	8	51
SL4.0ch06	12620683	MantaBND:146786:1:3:0:0:0:0	SL4.0CH06	12619803	BND	C	CGTG]SL4.0CH06:12619803]	1	8	51
SL4.0ch06	13220065	MantaBND:151:7376:7377:1:0:0:0	SL4.0CH06	13221286	BND	C	[SL4.0CH06:13221286[C	1	0	59
SL4.0ch06	13220099	MantaBND:162:60:62:2:0:0:0	SL4.0CH06	13221312	BND	C	[SL4.0CH06:13221312[C	3	0	57
SL4.0ch06	13220858	MantaBND:162:62:62:4:0:0:0	SL4.0CH06	13221384	BND	G	G]SL4.0CH06:13221384]	1	0	59
SL4.0ch06	13220953	MantaBND:151:7376:7376:1:0:0:0	SL4.0CH06	13221405	BND	T	T]SL4.0CH06:13221405]	1	0	59
SL4.0ch06	13221286	MantaBND:151:7376:7377:1:0:0:1	SL4.0CH06	13220065	BND	A	[SL4.0CH06:13220065[A	1	0	59
SL4.0ch06	13221312	MantaBND:162:60:62:2:0:0:1	SL4.0CH06	13220099	BND	T	[SL4.0CH06:13220099[T	3	0	57
SL4.0ch06	13221384	MantaBND:162:62:62:4:0:0:1	SL4.0CH06	13220858	BND	T	T]SL4.0CH06:13220858]	1	0	59
SL4.0ch06	13221405	MantaBND:151:7376:7376:1:0:0:1	SL4.0CH06	13220953	BND	T	T]SL4.0CH06:13220953]	1	0	59
SL4.0ch06	13442501	MantaBND:162:23736:23784:0:0:0:0	SL4.0CH01	40281184	BND	T	T[SL4.0CH01:40281184[	2	0	58
SL4.0ch06	13506270	MantaBND:36063:1:1:4:0:0:0	SL4.0CH06	13506384	BND	T	T]SL4.0CH06:13506384]	1	8	51
SL4.0ch06	13506293	MantaBND:477644:0:0:8:0:0:1	SL4.0CH06	13506377	BND	A	[SL4.0CH06:13506377[A	2	0	58
SL4.0ch06	13506377	MantaBND:477644:0:0:8:0:0:0	SL4.0CH06	13506293	BND	T	[SL4.0CH06:13506293[T	2	0	58
SL4.0ch06	13506380	MantaBND:36063:1:1:4:0:0:1	SL4.0CH06	13506274	BND	T	T]SL4.0CH06:13506274]	1	8	51
SL4.0ch06	13623143	MantaBND:151:7379:7381:0:0:0:0	SL4.0CH09	37626585	BND	A	A[SL4.0CH09:37626585[	1	0	59
SL4.0ch06	13706246	MantaBND:442304:0:1:0:0:0:0	SL4.0CH10	39950985	BND	T	]SL4.0CH10:39950985]T	1	0	59
SL4.0ch06	14067107	MantaBND:230958:2:6:0:0:0:0	SL4.0CH06	28979362	BND	A	[SL4.0CH06:28979362[AATCTTAGAGAGAGAAAAGTGACACTTGAGGAGTTAGATATTTGTTAA	2	0	58
SL4.0ch06	14213431	MantaBND:443637:0:1:0:0:0:0	SL4.0CH06	14718052	BND	T	[SL4.0CH06:14718052[T	1	2	57
SL4.0ch06	14213434	MantaBND:378763:0:1:0:0:0:0	SL4.0CH06	14718055	BND	T	[SL4.0CH06:14718055[T,[SL4.0CH06:14718107[T	0	0	58
SL4.0ch06	14213507	MantaBND:479492:0:1:0:0:0:0	SL4.0CH06	14718160	BND	A	[SL4.0CH06:14718160[A	5	0	55
SL4.0ch06	14718052	MantaBND:443637:0:1:0:0:0:1	SL4.0CH06	14213431	BND	C	[SL4.0CH06:14213431[C	1	2	57
SL4.0ch06	14718160	MantaBND:479492:0:1:0:0:0:1	SL4.0CH06	14213507	BND	A	[SL4.0CH06:14213507[A	5	0	55
SL4.0ch06	14721723	MantaBND:208205:1:2:0:0:0:0	SL4.0CH08	20900451	BND	G	[SL4.0CH08:20900451[G	1	0	59
SL4.0ch06	15842648	MantaBND:445898:0:1:0:0:0:0	SL4.0CH06	15843772	BND	C	[SL4.0CH06:15843772[C	8	0	52
SL4.0ch06	15843772	MantaBND:445898:0:1:0:0:0:1	SL4.0CH06	15842648	BND	A	[SL4.0CH06:15842648[A	8	0	52
SL4.0ch06	15843788	MantaBND:123:6218:6218:7:0:0:0	SL4.0CH06	15844028	BND	A	A]SL4.0CH06:15844028]	1	0	59
SL4.0ch06	15843849	MantaBND:162:208:208:21:0:0:1	SL4.0CH06	15843928	BND	A	A]SL4.0CH06:15843928]	3	0	57
SL4.0ch06	15843928	MantaBND:162:208:208:21:0:0:0	SL4.0CH06	15843849	BND	A	A]SL4.0CH06:15843849]	3	0	57
SL4.0ch06	15844028	MantaBND:123:6218:6218:7:0:0:1	SL4.0CH06	15843788	BND	G	G]SL4.0CH06:15843788]	1	0	59
SL4.0ch06	16150324	MantaBND:3038:22:23:0:0:0:0	SL4.0CH06	16156383	BND	T	T]SL4.0CH06:16156383]	1	9	50
SL4.0ch06	16155938	MantaBND:162:12361:12361:7:0:0:0	SL4.0CH06	16156454	BND	G	[SL4.0CH06:16156454[G	1	4	55
SL4.0ch06	16156377	MantaBND:3038:22:23:0:0:0:1	SL4.0CH06	16150330	BND	T	T]SL4.0CH06:16150330]	1	9	50
SL4.0ch06	16156454	MantaBND:162:12361:12361:7:0:0:1	SL4.0CH06	16155938	BND	T	[SL4.0CH06:16155938[T	1	4	55
SL4.0ch06	16169736	MantaBND:123:1565:3632:0:0:0:1	SL4.0CH03	54145790	BND	A	A[SL4.0CH03:54145790[	1	0	59
SL4.0ch06	16169738	MantaBND:162:16:231:0:0:0:1	SL4.0CH03	54145803	BND	G	G[SL4.0CH03:54145803[	1	0	59
SL4.0ch06	16262481	MantaBND:374721:3:4:0:0:0:0	SL4.0CH09	67090185	BND	G	GTGTGACGTCCCGCCACATTTCCAGTCGTTGTGCAGCATACGG[SL4.0CH09:67090185[	5	0	55
SL4.0ch06	16496007	MantaBND:26:12139:12141:0:0:0:1	SL4.0CH04	53376082	BND	A	]SL4.0CH04:53376082]TA	5	5	50
SL4.0ch06	16689248	MantaBND:150834:0:1:1:0:0:0	SL4.0CH02	30440065	BND	A	A]SL4.0CH02:30440065]	6	0	54
SL4.0ch06	16795411	MantaBND:151:7093:7094:0:0:0:1	SL4.0CH03	7062392	BND	T	T]SL4.0CH03:7062392]	2	0	58
SL4.0ch06	16829076	MantaBND:266796:0:2:0:0:0:1	SL4.0CH04	12328950	BND	A	A]SL4.0CH04:12328950]	1	0	59
SL4.0ch06	17242462	MantaBND:485306:0:1:0:0:0:1	SL4.0CH06	17460970	BND	A	[SL4.0CH06:17460970[AAGAA	0	5	55
SL4.0ch06	17348168	MantaBND:448560:0:1:0:0:0:1	SL4.0CH06	17532087	BND	C	[SL4.0CH06:17532087[C	0	1	59
SL4.0ch06	17460970	MantaBND:485306:0:1:0:0:0:0	SL4.0CH06	17242462	BND	G	[SL4.0CH06:17242462[TCTTG	0	5	55
SL4.0ch06	17488201	MantaBND:426796:0:1:0:0:0:1	SL4.0CH06	17491214	BND	A	AGT]SL4.0CH06:17491214]	0	6	54
SL4.0ch06	17491214	MantaBND:426796:0:1:0:0:0:0	SL4.0CH06	17488201	BND	T	TAC]SL4.0CH06:17488201]	0	6	54
SL4.0ch06	17532087	MantaBND:448560:0:1:0:0:0:0	SL4.0CH06	17348168	BND	T	[SL4.0CH06:17348168[T	0	1	59
SL4.0ch06	17659710	MantaBND:162:12553:12556:0:0:0:0	SL4.0CH10	45097118	BND	G	GG]SL4.0CH10:45097118]	5	0	55
SL4.0ch06	17831824	MantaBND:162:614:615:0:0:0:0	SL4.0CH06	17950427	BND	A	[SL4.0CH06:17950427[A	1	0	59
SL4.0ch06	17930834	MantaBND:117166:3:4:0:0:0:1	SL4.0CH12	36587323	BND	A	A]SL4.0CH12:36587323]	1	0	59
SL4.0ch06	17950427	MantaBND:162:614:615:0:0:0:1	SL4.0CH06	17831824	BND	T	[SL4.0CH06:17831824[T	1	0	59
SL4.0ch06	18059014	MantaBND:487448:0:1:0:0:0:0	SL4.0CH08	49914627	BND	A	A[SL4.0CH08:49914627[	5	0	55
SL4.0ch06	18313601	MantaBND:112556:3:6:0:0:0:0	SL4.0CH07	55370652	BND	A	]SL4.0CH07:55370652]A	5	0	55
SL4.0ch06	18344859	MantaBND:118808:0:1:0:1:0:0	SL4.0CH02	3718609	BND	T	]SL4.0CH02:3718609]T	6	0	54
SL4.0ch06	18610684	MantaBND:123:1565:3659:0:0:0:0	SL4.0CH03	54145798	BND	C	[SL4.0CH03:54145798[C	1	0	59
SL4.0ch06	18610813	MantaBND:162:16:507:0:0:0:0	SL4.0CH03	54145798	BND	G	[SL4.0CH03:54145798[G	1	0	59
SL4.0ch06	18862147	MantaBND:450999:0:1:0:0:0:1	SL4.0CH06	18867030	BND	C	[SL4.0CH06:18867030[TACTACTGC	1	1	58
SL4.0ch06	18867030	MantaBND:450999:0:1:0:0:0:0	SL4.0CH06	18862147	BND	T	[SL4.0CH06:18862147[CAGTAGTAT	1	1	58
SL4.0ch06	18872295	MantaBND:151:4329:4367:0:0:0:0	SL4.0CH03	54145770	BND	A	A[SL4.0CH03:54145770[	0	1	59
SL4.0ch06	20069577	MantaBND:453598:0:1:0:0:0:1	SL4.0CH08	18777967	BND	A	]SL4.0CH08:18777967]A	2	0	58
SL4.0ch06	20069607	MantaBND:491163:0:2:0:0:0:1	SL4.0CH08	18777967	BND	G	]SL4.0CH08:18777967]G	3	0	57
SL4.0ch06	20146588	MantaBND:151:4329:4341:0:0:0:0	SL4.0CH03	54145799	BND	T	T[SL4.0CH03:54145799[	1	0	59
SL4.0ch06	20197136	MantaBND:491814:0:1:1:0:0:0	SL4.0CH07	46927254	BND	C	[SL4.0CH07:46927254[C	1	0	59
SL4.0ch06	20551176	MantaBND:492524:0:1:0:0:0:0	SL4.0CH06	20648926	BND	A	A]SL4.0CH06:20648926]	3	0	57
SL4.0ch06	20555104	MantaBND:389124:0:2:1:0:0:0	SL4.0CH06	20703649	BND	T	[SL4.0CH06:20703649[AT	4	2	54
SL4.0ch06	20648926	MantaBND:492524:0:1:0:0:0:1	SL4.0CH06	20551176	BND	G	G]SL4.0CH06:20551176]	3	0	57
SL4.0ch06	20699388	MantaBND:470538:4:8:0:0:0:1	SL4.0CH06	20703649	BND	T	[SL4.0CH06:20703649[ATATAATTACTCTAAGGCTCACCTAAAAAAAACATGAAGAGACCTCTCATACACCCTCTTCAAGCCTACCTAAAGAATCCTCAAAGCTACTCT	4	1	55
SL4.0ch06	20703649	MantaBND:389124:0:2:1:0:0:1	SL4.0CH06	20555104	BND	A	[SL4.0CH06:20555104[TA	4	2	54
SL4.0ch06	20703649	MantaBND:470538:4:8:0:0:0:0	SL4.0CH06	20699388	BND	A	[SL4.0CH06:20699388[GAGTAGCTTTGAGGATTCTTTAGGTAGGCTTGAAGAGGGTGTATGAGAGGTCTCTTCATGTTTTTTTTAGGTGAGCCTTAGAGTAATTATATA	4	1	55
SL4.0ch06	20718312	MantaBND:454893:0:1:0:0:0:0	SL4.0CH06	28247892	BND	G	G]SL4.0CH06:28247892]	0	1	59
SL4.0ch06	21001095	MantaBND:162:816:820:0:0:0:0	SL4.0CH03	12097231	BND	T	[SL4.0CH03:12097231[TT	5	0	55
SL4.0ch06	21063134	MantaBND:162:1016:1071:0:0:0:0	SL4.0CH06	21065186	BND	C	[SL4.0CH06:21065186[C	1	0	59
SL4.0ch06	21065186	MantaBND:162:1016:1071:0:0:0:1	SL4.0CH06	21063134	BND	A	[SL4.0CH06:21063134[A	1	0	59
SL4.0ch06	21165537	MantaBND:162:12868:12872:0:0:0:0	SL4.0CH10	64390643	BND	T	TG]SL4.0CH10:64390643]	5	0	55
SL4.0ch06	21270202	MantaBND:162:21058:21064:0:0:0:0	SL4.0CH12	7694713	BND	C	CC]SL4.0CH12:7694713]	4	0	56
SL4.0ch06	21555691	MantaBND:159844:8:9:0:0:0:0	SL4.0CH08	14213361	BND	T	[SL4.0CH08:14213361[T	9	0	51
SL4.0ch06	21965935	MantaBND:349664:0:1:0:0:0:0	SL4.0CH04	52668516	BND	C	C[SL4.0CH04:52668516[	3	0	57
SL4.0ch06	21966012	MantaBND:322847:0:1:0:0:0:0	SL4.0CH04	52668500	BND	T	T[SL4.0CH04:52668500[	1	0	59
SL4.0ch06	21966029	MantaBND:271901:0:1:0:0:0:0	SL4.0CH04	52668500	BND	T	T[SL4.0CH04:52668500[	1	0	59
SL4.0ch06	22100428	MantaBND:162:14688:14689:0:1:0:0	SL4.0CH04	58163988	BND	T	T[SL4.0CH04:58163988[	5	0	55
SL4.0ch06	22207646	MantaBND:496080:0:1:0:0:0:1	SL4.0CH07	56625327	BND	T	T[SL4.0CH07:56625327[	1	0	59
SL4.0ch06	22314443	MantaBND:496237:0:0:5:0:0:0	SL4.0CH06	22314619	BND	A	A]SL4.0CH06:22314619]	0	5	55
SL4.0ch06	22314524	MantaBND:496237:0:0:7:0:0:0	SL4.0CH06	22314735	BND	G	[SL4.0CH06:22314735[AG	0	5	55
SL4.0ch06	22314619	MantaBND:496237:0:0:5:0:0:1	SL4.0CH06	22314443	BND	C	C]SL4.0CH06:22314443]	0	5	55
SL4.0ch06	22314735	MantaBND:496237:0:0:7:0:0:1	SL4.0CH06	22314524	BND	G	[SL4.0CH06:22314524[TG,[SL4.0CH06:22314523[G	0	5	54
SL4.0ch06	22433387	MantaBND:114350:19:21:0:0:0:0	SL4.0CH06	22472862	BND	C	[SL4.0CH06:22472862[C	0	2	58
SL4.0ch06	22433492	MantaBND:43336:36:37:0:0:0:0	SL4.0CH06	22472970	BND	A	[SL4.0CH06:22472970[A	0	4	56
SL4.0ch06	22451180	MantaBND:151:7083:7314:0:0:0:1	SL4.0CH10	49454974	BND	T	T]SL4.0CH10:49454974]	1	0	59
SL4.0ch06	22451205	MantaBND:151:7083:7315:0:0:0:0	SL4.0CH02	44942683	BND	G	G[SL4.0CH02:44942683[	1	0	59
SL4.0ch06	22472862	MantaBND:114350:19:21:0:0:0:1	SL4.0CH06	22433387	BND	G	[SL4.0CH06:22433387[G	0	2	58
SL4.0ch06	22472970	MantaBND:43336:36:37:0:0:0:1	SL4.0CH06	22433492	BND	A	[SL4.0CH06:22433492[A	0	4	56
SL4.0ch06	22825971	MantaBND:278129:1:2:0:0:0:1	SL4.0CH06	32296008	BND	T	[SL4.0CH06:32296008[T	1	0	59
SL4.0ch06	23123751	MantaBND:342814:1:2:0:0:0:0	SL4.0CH11	17869976	BND	C	C]SL4.0CH11:17869976]	1	0	59
SL4.0ch06	23156584	MantaBND:162:9369:13337:0:0:0:0	SL4.0CH11	46123822	BND	T	T[SL4.0CH11:46123822[	2	0	58
SL4.0ch06	23156646	MantaBND:162:9369:13337:1:0:0:0	SL4.0CH11	46124145	BND	G	]SL4.0CH11:46124145]G	5	0	55
SL4.0ch06	23252663	MantaBND:26:31346:31350:0:0:0:0	SL4.0CH08	21220359	BND	A	]SL4.0CH08:21220359]AGTA	1	0	59
SL4.0ch06	23386420	MantaBND:394038:0:1:0:0:0:0	SL4.0CH12	34024216	BND	T	]SL4.0CH12:34024216]T	1	0	59
SL4.0ch06	23399951	MantaBND:459234:0:1:0:0:0:1	SL4.0CH09	32495231	BND	A	A]SL4.0CH09:32495231]	9	0	51
SL4.0ch06	23407189	MantaBND:151:4329:4336:0:0:0:1	SL4.0CH03	54145808	BND	A	[SL4.0CH03:54145808[A	1	0	59
SL4.0ch06	23407246	MantaBND:162:16:1154:0:0:0:1	SL4.0CH03	54145804	BND	T	[SL4.0CH03:54145804[T	3	1	56
SL4.0ch06	23602241	MantaBND:151:3171:3173:0:1:0:1	SL4.0CH02	51200183	BND	C	[SL4.0CH02:51200183[C	3	0	57
SL4.0ch06	23853486	MantaBND:15396:3:5:0:0:0:1	SL4.0CH06	23863843	BND	G	[SL4.0CH06:23863843[G	1	0	59
SL4.0ch06	23853582	MantaBND:26:784:11721:0:0:0:0	SL4.0CH06	23854614	BND	A	AT]SL4.0CH06:23854614]	0	6	54
SL4.0ch06	23854614	MantaBND:26:784:11721:0:0:0:1	SL4.0CH06	23853582	BND	A	AA]SL4.0CH06:23853582]	0	6	54
SL4.0ch06	23863843	MantaBND:15396:3:5:0:0:0:0	SL4.0CH06	23853486	BND	G	[SL4.0CH06:23853486[G	1	0	59
SL4.0ch06	23953486	MantaBND:162:21089:21093:0:1:0:0	SL4.0CH04	46965697	BND	T	]SL4.0CH04:46965697]T	5	0	55
SL4.0ch06	23967082	MantaBND:151:7922:7929:0:0:0:1	SL4.0CH06	23970872	BND	T	[SL4.0CH06:23970872[T	1	0	59
SL4.0ch06	23967097	MantaBND:162:14166:14171:0:0:0:1	SL4.0CH06	23970854	BND	T	[SL4.0CH06:23970854[T	1	0	59
SL4.0ch06	23968085	MantaBND:151:7922:7927:0:3:0:1	SL4.0CH06	23970871	BND	A	A]SL4.0CH06:23970871]	0	7	53
SL4.0ch06	23970854	MantaBND:162:14166:14171:0:0:0:0	SL4.0CH06	23967097	BND	A	[SL4.0CH06:23967097[A	1	0	59
SL4.0ch06	23970869	MantaBND:151:7922:7927:0:3:0:0	SL4.0CH06	23968087	BND	T	T]SL4.0CH06:23968087]	0	7	53
SL4.0ch06	23970872	MantaBND:151:7922:7929:0:0:0:0	SL4.0CH06	23967082	BND	A	[SL4.0CH06:23967082[A	1	0	59
SL4.0ch06	24000751	MantaBND:460812:0:0:6:0:0:1	SL4.0CH06	24001276	BND	A	A]SL4.0CH06:24001276]	1	8	51
SL4.0ch06	24001276	MantaBND:460812:0:0:6:0:0:0	SL4.0CH06	24000751	BND	T	T]SL4.0CH06:24000751]	1	8	51
SL4.0ch06	24756654	MantaBND:234401:1:2:0:0:0:0	SL4.0CH05	5505990	BND	G	[SL4.0CH05:5505990[G	1	0	59
SL4.0ch06	24841318	MantaBND:162:18762:18763:0:0:0:0	SL4.0CH01	36998705	BND	T	T[SL4.0CH01:36998705[	5	0	55
SL4.0ch06	24995698	MantaBND:122461:7:9:0:1:0:0	SL4.0CH04	21929627	BND	T	T]SL4.0CH04:21929627]	8	0	52
SL4.0ch06	25853127	MantaBND:464748:0:0:5:0:0:1	SL4.0CH06	25853590	BND	T	[SL4.0CH06:25853590[T	1	0	59
SL4.0ch06	25853325	MantaBND:464748:0:0:2:0:0:1	SL4.0CH06	25853547	BND	G	G]SL4.0CH06:25853547]	1	0	59
SL4.0ch06	25853547	MantaBND:464748:0:0:2:0:0:0	SL4.0CH06	25853325	BND	C	C]SL4.0CH06:25853325]	1	0	59
SL4.0ch06	25853590	MantaBND:464748:0:0:5:0:0:0	SL4.0CH06	25853127	BND	A	[SL4.0CH06:25853127[A	1	0	59
SL4.0ch06	26799444	MantaBND:13935:65:66:0:0:0:0	SL4.0CH11	10685529	BND	A	]SL4.0CH11:10685529]A	7	0	53
SL4.0ch06	27460239	MantaBND:151:4329:4395:0:0:0:0	SL4.0CH03	54145801	BND	C	[SL4.0CH03:54145801[C	1	0	59
SL4.0ch06	27566011	MantaBND:123:8635:8637:0:0:0:0	SL4.0CH10	4457603	BND	C	]SL4.0CH10:4457603]C	1	0	59
SL4.0ch06	27615188	MantaBND:7478:3:5:1:1:0:1	SL4.0CH07	1265506	BND	A	A[SL4.0CH07:1265506[	9	0	51
SL4.0ch06	27687352	MantaBND:218534:0:1:0:0:0:0	SL4.0CH03	32538997	BND	T	]SL4.0CH03:32538997]T	1	0	59
SL4.0ch06	27687403	MantaBND:8338:9:17:0:0:0:1	SL4.0CH03	32539016	BND	T	]SL4.0CH03:32539016]T	1	0	59
SL4.0ch06	28247890	MantaBND:454893:0:1:0:0:0:1	SL4.0CH06	20718314	BND	T	T]SL4.0CH06:20718314]	0	1	59
SL4.0ch06	28883831	MantaBND:82705:3:4:0:0:0:0	SL4.0CH02	21957394	BND	A	]SL4.0CH02:21957394]A	3	0	57
SL4.0ch06	28979362	MantaBND:230958:2:6:0:0:0:1	SL4.0CH06	14067107	BND	T	[SL4.0CH06:14067107[TAACAAATATCTAACTCCTCAAGTGTCACTTTTCTCTCTCTAAGATTT	2	0	58
SL4.0ch06	29230055	MantaBND:470774:0:1:0:0:0:0	SL4.0CH09	57928357	BND	T	]SL4.0CH09:57928357]T	3	0	57
SL4.0ch06	29520297	MantaBND:123:7010:7012:0:0:0:1	SL4.0CH10	48868182	BND	G	]SL4.0CH10:48868182]G	1	0	59
SL4.0ch06	29536660	MantaBND:411224:1:1:4:0:0:1	SL4.0CH06	29537116	BND	G	G]SL4.0CH06:29537116]	1	0	59
SL4.0ch06	29536729	MantaBND:411224:1:1:9:0:0:1	SL4.0CH06	29537020	BND	C	[SL4.0CH06:29537020[C	1	0	59
SL4.0ch06	29537020	MantaBND:411224:1:1:9:0:0:0	SL4.0CH06	29536729	BND	C	[SL4.0CH06:29536729[C	1	0	59
SL4.0ch06	29537116	MantaBND:411224:1:1:4:0:0:0	SL4.0CH06	29536660	BND	T	T]SL4.0CH06:29536660]	1	0	59
SL4.0ch06	29834879	MantaBND:471469:0:2:0:0:0:0	SL4.0CH10	10920277	BND	G	G[SL4.0CH10:10920277[	1	0	59
SL4.0ch06	29966089	MantaBND:32:14835:14838:0:0:0:1	SL4.0CH09	68046546	BND	G	G]SL4.0CH09:68046546]	1	0	59
SL4.0ch06	30454572	MantaBND:123:11726:11729:0:0:0:1	SL4.0CH04	29804757	BND	T	T[SL4.0CH04:29804757[	1	0	59
SL4.0ch06	30699182	MantaBND:344157:1:1:9:0:0:1	SL4.0CH06	30699414	BND	G	G]SL4.0CH06:30699414]	1	0	59
SL4.0ch06	30699414	MantaBND:344157:1:1:9:0:0:0	SL4.0CH06	30699182	BND	T	T]SL4.0CH06:30699182]	1	0	59
SL4.0ch06	30793967	MantaBND:93729:1:2:0:0:0:1	SL4.0CH12	61317704	BND	T	[SL4.0CH12:61317704[T	1	0	59
SL4.0ch06	30972885	MantaBND:512861:0:1:0:3:0:0	SL4.0CH11	7796546	BND	G	G]SL4.0CH11:7796546]	2	0	58
SL4.0ch06	31140325	MantaBND:133823:0:2:0:0:0:1	SL4.0CH02	11863002	BND	G	[SL4.0CH02:11863002[TCAG	1	0	59
SL4.0ch06	31140329	MantaBND:133823:0:2:1:0:0:1	SL4.0CH02	11863314	BND	A	A]SL4.0CH02:11863314]	1	0	59
SL4.0ch06	31243230	MantaBND:151:10685:10686:0:0:0:0	SL4.0CH10	2960666	BND	A	]SL4.0CH10:2960666]A	1	0	59
SL4.0ch06	32131299	MantaBND:80817:2:3:0:0:0:0	SL4.0CH05	53071290	BND	C	C[SL4.0CH05:53071290[	1	0	59
SL4.0ch06	32278415	MantaBND:370605:0:1:0:0:0:0	SL4.0CH07	26791808	BND	T	T[SL4.0CH07:26791808[	1	0	59
SL4.0ch06	32296008	MantaBND:278129:1:2:0:0:0:0	SL4.0CH06	22825971	BND	A	[SL4.0CH06:22825971[A	1	0	59
SL4.0ch06	32335150	MantaBND:234006:0:2:0:0:0:0	SL4.0CH03	45081768	BND	T	]SL4.0CH03:45081768]T,]SL4.0CH03:45081761]T	1	0	58
SL4.0ch06	32984825	MantaBND:151:4329:4361:0:0:0:1	SL4.0CH03	54145779	BND	A	A[SL4.0CH03:54145779[	1	0	59
SL4.0ch06	33623942	MantaBND:143:9569:9618:0:1:0:0	SL4.0CH01	32200379	BND	G	G[SL4.0CH01:32200379[	1	0	59
SL4.0ch06	33624480	MantaBND:143:9569:9618:1:1:0:0	SL4.0CH01	32200550	BND	G	]SL4.0CH01:32200550]TGGGGAACCATCACGTATTCTAACACCAG	1	0	59
SL4.0ch06	33987988	MantaBND:478214:0:1:0:1:0:0	SL4.0CH09	67650734	BND	A	]SL4.0CH09:67650734]A	7	0	53
SL4.0ch06	33988371	MantaBND:478214:0:1:1:0:0:1	SL4.0CH09	67650736	BND	G	G[SL4.0CH09:67650736[	1	0	59
SL4.0ch06	34306420	MantaBND:123:6717:6848:0:7:0:0	SL4.0CH02	40075065	BND	G	G[SL4.0CH02:40075065[	3	1	56
SL4.0ch06	35373357	MantaBND:413469:0:1:0:0:0:0	SL4.0CH06	35405985	BND	G	GGGAATGAATTA]SL4.0CH06:35405985]	0	2	58
SL4.0ch06	35373774	MantaBND:413036:0:1:0:0:0:0	SL4.0CH06	35407142	BND	A	[SL4.0CH06:35407142[A	0	2	58
SL4.0ch06	35405533	MantaBND:336286:0:1:0:0:0:1	SL4.0CH05	50544870	BND	A	A]SL4.0CH05:50544870]	1	0	59
SL4.0ch06	35405985	MantaBND:413469:0:1:0:0:0:1	SL4.0CH06	35373357	BND	A	ATAATTCATTCC]SL4.0CH06:35373357]	0	2	58
SL4.0ch06	35407139	MantaBND:413036:0:1:0:0:0:1	SL4.0CH06	35373777	BND	C	[SL4.0CH06:35373777[C	0	2	58
SL4.0ch06	35616564	MantaBND:270970:1:3:0:0:0:1	SL4.0CH06	35640604	BND	A	[SL4.0CH06:35640604[A	0	1	59
SL4.0ch06	35640604	MantaBND:270970:1:3:0:0:0:0	SL4.0CH06	35616564	BND	T	[SL4.0CH06:35616564[T	0	1	59
SL4.0ch06	36233159	MantaBND:98712:4:4:7:0:0:0	SL4.0CH06	36233214	BND	C	C]SL4.0CH06:36233214]	1	0	59
SL4.0ch06	36233214	MantaBND:98712:4:4:7:0:0:1	SL4.0CH06	36233159	BND	G	G]SL4.0CH06:36233159]	1	0	59
SL4.0ch06	36693524	MantaBND:123:4689:4690:0:0:0:0	SL4.0CH05	62686852	BND	A	A]SL4.0CH05:62686852]	7	0	53
SL4.0ch06	36764856	MantaBND:478710:0:1:0:0:0:1	SL4.0CH10	23674135	BND	A	A[SL4.0CH10:23674135[	1	0	59
SL4.0ch06	36940234	MantaBND:480474:0:3:0:0:0:0	SL4.0CH08	90317	BND	T	T[SL4.0CH08:90317[	3	0	57
SL4.0ch06	36940240	MantaBND:374650:1:2:0:0:0:0	SL4.0CH08	90329	BND	G	G[SL4.0CH08:90329[	5	0	55
SL4.0ch06	36940254	MantaBND:454450:1:2:0:0:0:0	SL4.0CH08	90300	BND	A	A[SL4.0CH08:90300[	1	0	59
SL4.0ch06	36945474	MantaBND:89770:0:1:0:0:0:1	SL4.0CH01	81364314	BND	G	]SL4.0CH01:81364314]GGG	1	0	59
SL4.0ch06	37836754	MantaBND:481013:0:2:0:0:0:0	SL4.0CH09	5026027	BND	C	C[SL4.0CH09:5026027[	1	0	59
SL4.0ch06	38160642	MantaBND:151:8186:8187:1:0:0:0	SL4.0CH01	76216349	BND	T	]SL4.0CH01:76216349]T	1	0	59
SL4.0ch06	38160672	MantaBND:32:8222:8223:0:1:0:0	SL4.0CH01	76216250	BND	G	]SL4.0CH01:76216250]G	4	0	56
SL4.0ch06	38160676	MantaBND:151:8187:8188:1:0:0:0	SL4.0CH03	57520563	BND	A	A[SL4.0CH03:57520563[	26	5	29
SL4.0ch06	38160676	MantaBND:151:8186:8187:0:0:0:0	SL4.0CH01	76216102	BND	A	A[SL4.0CH01:76216102[	40	0	20
SL4.0ch06	38534461	MantaBND:481779:0:1:0:1:0:0	SL4.0CH12	3019683	BND	A	[SL4.0CH12:3019683[A	7	0	53
SL4.0ch06	38864102	MantaBND:482015:0:2:0:0:0:0	SL4.0CH06	39101273	BND	C	CATT]SL4.0CH06:39101273]	3	0	57
SL4.0ch06	39101273	MantaBND:482015:0:2:0:0:0:1	SL4.0CH06	38864102	BND	T	TAAT]SL4.0CH06:38864102]	3	0	57
SL4.0ch06	39618869	MantaBND:483012:0:0:1:0:0:0	SL4.0CH06	39618973	BND	A	ACAGTATGTGAAGATTTTTGTGATAGATAGTACTCGGAGAAAAATTACAAATTGATTTGAGTTGCTGGGATG]SL4.0CH06:39618973]	5	13	42
SL4.0ch06	39618973	MantaBND:483012:0:0:1:0:0:1	SL4.0CH06	39618869	BND	T	TCATCCCAGCAACTCAAATCAATTTGTAATTTTTCTCCGAGTACTATCTATCACAAAAATCTTCACATACTG]SL4.0CH06:39618869]	5	13	42
SL4.0ch06	41541974	MantaBND:271739:0:1:0:0:0:0	SL4.0CH05	18556165	BND	C	[SL4.0CH05:18556165[C	2	0	58
SL4.0ch06	44069127	MantaBND:76705:2:8:0:4:0:0	SL4.0CH07	64506189	BND	G	G[SL4.0CH07:64506189[	3	0	57
SL4.0ch06	44604385	MantaBND:309160:0:1:0:0:0:0	SL4.0CH04	41982596	BND	A	A]SL4.0CH04:41982596]	1	0	59
SL4.0ch06	44604391	MantaBND:334851:0:1:0:0:0:0	SL4.0CH04	41982636	BND	T	T]SL4.0CH04:41982636]	2	0	58
SL4.0ch06	44750625	MantaBND:270273:1:2:0:0:0:0	SL4.0CH06	44817032	BND	T	[SL4.0CH06:44817032[T	12	0	48
SL4.0ch06	44750633	MantaBND:320658:1:3:0:2:0:0	SL4.0CH06	44817032	BND	C	[SL4.0CH06:44817032[TTTGTCCC	9	0	51
SL4.0ch06	44817032	MantaBND:320658:1:3:0:2:0:1	SL4.0CH06	44750633	BND	A	[SL4.0CH06:44750633[GGACAAAA,[SL4.0CH06:44750625[A	9	0	39
SL4.0ch06	47258699	MantaBND:321739:0:1:0:0:0:1	SL4.0CH04	64459972	BND	C	C]SL4.0CH04:64459972]	8	0	52
SL4.0ch07	1265506	MantaBND:7478:3:5:1:1:0:0	SL4.0CH06	27615188	BND	A	]SL4.0CH06:27615188]A,]SL4.0CH06:27615185]ACTAA	9	0	51
SL4.0ch07	2615740	MantaBND:465169:0:1:0:0:0:1	SL4.0CH07	15651744	BND	T	T]SL4.0CH07:15651744]	1	0	59
SL4.0ch07	3095969	MantaBND:143:10675:10676:0:0:0:1	SL4.0CH07	3096351	BND	T	[SL4.0CH07:3096351[T	1	0	59
SL4.0ch07	3096351	MantaBND:143:10675:10676:0:0:0:0	SL4.0CH07	3095969	BND	A	[SL4.0CH07:3095969[A	1	0	59
SL4.0ch07	3411258	MantaBND:32:17135:17141:0:0:0:0	SL4.0CH09	68338499	BND	G	[SL4.0CH09:68338499[G	1	0	59
SL4.0ch07	6671560	MantaBND:151:12166:12168:0:0:0:1	SL4.0CH09	31071672	BND	T	]SL4.0CH09:31071672]T	3	0	57
SL4.0ch07	6737605	MantaBND:222897:1:2:1:0:0:0	SL4.0CH11	38888496	BND	T	T[SL4.0CH11:38888496[	1	0	59
SL4.0ch07	7166456	MantaBND:494837:0:1:0:3:0:1	SL4.0CH07	7344904	BND	C	C]SL4.0CH07:7344904]	1	0	59
SL4.0ch07	7344860	MantaBND:494837:0:1:0:3:0:0	SL4.0CH07	7166500	BND	G	G]SL4.0CH07:7166500]	1	0	59
SL4.0ch07	9732510	MantaBND:151:10399:10406:0:4:0:0	SL4.0CH09	3731733	BND	A	]SL4.0CH09:3731733]A	1	0	59
SL4.0ch07	12632937	MantaBND:232262:1:4:0:0:0:1	SL4.0CH09	46282029	BND	T	[SL4.0CH09:46282029[T	3	0	57
SL4.0ch07	15651744	MantaBND:465169:0:1:0:0:0:0	SL4.0CH07	2615740	BND	G	G]SL4.0CH07:2615740]	1	0	59
SL4.0ch07	15951482	MantaBND:162:9859:9860:0:6:0:0	SL4.0CH06	9234735	BND	T	]SL4.0CH06:9234735]TTTTTTTTTTTTTTTTTTT	4	0	56
SL4.0ch07	15959721	MantaBND:162:9860:9864:0:0:0:1	SL4.0CH06	9234835	BND	T	T[SL4.0CH06:9234835[	1	0	59
SL4.0ch07	16286231	MantaBND:355038:1:2:0:1:0:1	SL4.0CH12	32866643	BND	G	]SL4.0CH12:32866643]G	47	0	13
SL4.0ch07	16824166	MantaBND:151:11185:11189:0:0:0:1	SL4.0CH09	11964546	BND	G	G[SL4.0CH09:11964546[	1	0	59
SL4.0ch07	17044517	MantaBND:34768:0:1:0:0:0:1	SL4.0CH01	21229851	BND	C	[SL4.0CH01:21229851[C	1	0	59
SL4.0ch07	20318064	MantaBND:151:18967:18970:0:0:0:0	SL4.0CH01	17929771	BND	C	]SL4.0CH01:17929771]GAAATATACATAGTAAAC	21	0	39
SL4.0ch07	20318175	MantaBND:151:18970:18971:0:0:0:0	SL4.0CH08	15639722	BND	T	T]SL4.0CH08:15639722]	21	0	39
SL4.0ch07	20565122	MantaBND:431017:3:4:0:0:0:1	SL4.0CH06	7363583	BND	T	T]SL4.0CH06:7363583]	1	0	59
SL4.0ch07	24190953	MantaBND:14578:1:2:0:0:0:0	SL4.0CH11	26349863	BND	C	C]SL4.0CH11:26349863]	2	0	58
SL4.0ch07	26483856	MantaBND:385573:1:2:0:0:0:1	SL4.0CH09	25253414	BND	T	T[SL4.0CH09:25253414[	1	0	59
SL4.0ch07	26791808	MantaBND:370605:0:1:0:0:0:1	SL4.0CH06	32278415	BND	A	]SL4.0CH06:32278415]A	1	0	59
SL4.0ch07	28157123	MantaBND:151:7603:7723:0:0:0:1	SL4.0CH06	11439590	BND	A	]SL4.0CH06:11439590]A	1	0	59
SL4.0ch07	31914813	MantaBND:463187:0:1:0:0:0:1	SL4.0CH06	6606265	BND	A	]SL4.0CH06:6606265]A	2	0	58
SL4.0ch07	31915827	MantaBND:173035:1:2:0:0:0:1	SL4.0CH02	47122255	BND	T	TT[SL4.0CH02:47122255[	12	0	48
SL4.0ch07	32237811	MantaBND:173385:0:1:0:0:0:0	SL4.0CH02	44914389	BND	T	]SL4.0CH02:44914389]T	1	0	59
SL4.0ch07	34776137	MantaBND:282977:0:1:0:0:0:0	SL4.0CH04	31397148	BND	C	[SL4.0CH04:31397148[C	1	0	59
SL4.0ch07	38500704	MantaBND:61998:1:5:0:0:0:0	SL4.0CH08	22005939	BND	T	T[SL4.0CH08:22005939[	1	0	59
SL4.0ch07	39846658	MantaBND:457136:0:1:0:0:0:0	SL4.0CH10	50298942	BND	A	AA]SL4.0CH10:50298942]	1	0	59
SL4.0ch07	42532926	MantaBND:76705:2:9:0:5:0:1	SL4.0CH07	64506189	BND	A	[SL4.0CH07:64506189[A	1	0	59
SL4.0ch07	43784334	MantaBND:192201:0:1:0:0:0:0	SL4.0CH03	12791975	BND	G	G[SL4.0CH03:12791975[	1	0	59
SL4.0ch07	46652315	MantaBND:538742:0:1:0:0:0:0	SL4.0CH09	5279206	BND	T	T]SL4.0CH09:5279206]	1	0	59
SL4.0ch07	46662051	MantaBND:329682:0:1:0:1:0:1	SL4.0CH04	59181769	BND	C	]SL4.0CH04:59181769]CC	1	0	59
SL4.0ch07	46927254	MantaBND:491814:0:1:1:0:0:1	SL4.0CH06	20197136	BND	G	[SL4.0CH06:20197136[G	1	0	59
SL4.0ch07	47640310	MantaBND:211299:0:1:0:0:0:0	SL4.0CH03	15887994	BND	A	A]SL4.0CH03:15887994]	4	0	56
SL4.0ch07	48535319	MantaBND:288751:0:1:0:0:0:0	SL4.0CH04	24813274	BND	G	]SL4.0CH04:24813274]G	1	0	59
SL4.0ch07	50106603	MantaBND:515291:0:1:0:0:0:0	SL4.0CH09	63891728	BND	C	]SL4.0CH09:63891728]C	1	0	59
SL4.0ch07	50824713	MantaBND:247565:1:3:0:0:0:1	SL4.0CH09	22321404	BND	G	[SL4.0CH09:22321404[G	2	0	58
SL4.0ch07	50841220	MantaBND:247565:2:3:0:0:0:0	SL4.0CH09	22321371	BND	C	C]SL4.0CH09:22321371]	1	0	59
SL4.0ch07	51533706	MantaBND:32401:0:1:0:0:0:0	SL4.0CH01	19967170	BND	T	TT]SL4.0CH01:19967170]	1	0	59
SL4.0ch07	51561555	MantaBND:547423:0:1:0:0:0:1	SL4.0CH09	7314588	BND	G	G[SL4.0CH09:7314588[	1	0	59
SL4.0ch07	52798826	MantaBND:26:18700:27006:0:9:0:0	SL4.0CH11	18865722	BND	T	[SL4.0CH11:18865722[T	1	0	59
SL4.0ch07	55370652	MantaBND:112556:3:6:0:0:0:1	SL4.0CH06	18313601	BND	A	A[SL4.0CH06:18313601[	5	0	55
SL4.0ch07	56521927	MantaBND:26:26377:26379:0:0:0:1	SL4.0CH11	9966772	BND	T	[SL4.0CH11:9966772[T	7	0	53
SL4.0ch07	56625327	MantaBND:496080:0:1:0:0:0:0	SL4.0CH06	22207646	BND	A	]SL4.0CH06:22207646]A	1	0	59
SL4.0ch07	56761073	MantaBND:553069:0:1:0:0:0:0	SL4.0CH09	49495728	BND	C	C]SL4.0CH09:49495728]	3	0	57
SL4.0ch07	57525815	MantaBND:194608:0:2:0:1:0:1	SL4.0CH03	15072606	BND	A	AG]SL4.0CH03:15072606]	2	0	58
SL4.0ch07	57647186	MantaBND:550415:0:1:0:2:0:1	SL4.0CH11	30854134	BND	T	]SL4.0CH11:30854134]ATTCGTTAACTTTATCAAATTTTCGTTTTGTCGAAGAAAT	4	0	56
SL4.0ch07	58278470	MantaBND:528425:1:2:0:0:0:0	SL4.0CH11	4978614	BND	C	C]SL4.0CH11:4978614]	1	0	59
SL4.0ch07	58597281	MantaBND:327592:0:1:0:0:0:1	SL4.0CH04	55209588	BND	A	A[SL4.0CH04:55209588[	1	0	59
SL4.0ch07	58607182	MantaBND:20536:18:19:0:0:0:0	SL4.0CH03	4725314	BND	T	TAA]SL4.0CH03:4725314]	2	0	58
SL4.0ch07	58778726	MantaBND:125521:0:1:0:0:0:1	SL4.0CH02	9175139	BND	A	]SL4.0CH02:9175139]TA	2	0	58
SL4.0ch07	59345398	MantaBND:469063:2:6:0:0:0:0	SL4.0CH08	53981703	BND	T	[SL4.0CH08:53981703[T	1	0	59
SL4.0ch07	59433247	MantaBND:255133:2:2:7:0:0:1	SL4.0CH07	59433658	BND	T	[SL4.0CH07:59433658[T	1	0	59
SL4.0ch07	59433337	MantaBND:255133:2:2:5:0:0:1	SL4.0CH07	59433781	BND	A	A]SL4.0CH07:59433781]	1	0	59
SL4.0ch07	59433350	MantaBND:245948:2:2:6:0:0:1	SL4.0CH07	59433795	BND	C	C]SL4.0CH07:59433795]	1	0	59
SL4.0ch07	59433658	MantaBND:255133:2:2:7:0:0:0	SL4.0CH07	59433247	BND	A	[SL4.0CH07:59433247[A	1	0	59
SL4.0ch07	59433781	MantaBND:255133:2:2:5:0:0:0	SL4.0CH07	59433337	BND	C	C]SL4.0CH07:59433337]	1	0	59
SL4.0ch07	59433795	MantaBND:245948:2:2:6:0:0:0	SL4.0CH07	59433350	BND	C	C]SL4.0CH07:59433350]	1	0	59
SL4.0ch07	59709619	MantaBND:96214:0:1:0:2:0:0	SL4.0CH01	68666462	BND	T	TT[SL4.0CH01:68666462[	24	0	36
SL4.0ch07	60041726	MantaBND:557242:0:1:0:0:0:1	SL4.0CH11	6386444	BND	T	[SL4.0CH11:6386444[T	5	0	55
SL4.0ch07	60382310	MantaBND:32:12785:12842:0:0:0:0	SL4.0CH07	61298148	BND	T	[SL4.0CH07:61298148[T	1	0	59
SL4.0ch07	60408008	MantaBND:26:14007:14018:0:0:0:1	SL4.0CH05	35165044	BND	T	T]SL4.0CH05:35165044]	5	0	55
SL4.0ch07	60438527	MantaBND:151:15648:15649:0:0:0:1	SL4.0CH07	60620032	BND	C	[SL4.0CH07:60620032[C	4	0	56
SL4.0ch07	60438529	MantaBND:26:15987:15993:0:0:0:1	SL4.0CH07	60620049	BND	A	[SL4.0CH07:60620049[A	1	0	59
SL4.0ch07	60438541	MantaBND:143:12075:12085:0:0:0:1	SL4.0CH07	60620084	BND	T	[SL4.0CH07:60620084[T	1	0	59
SL4.0ch07	60438544	MantaBND:476944:0:1:0:0:0:0	SL4.0CH07	60620049	BND	T	[SL4.0CH07:60620049[T	1	0	59
SL4.0ch07	60438545	MantaBND:32:9463:9464:0:0:0:0	SL4.0CH07	60620049	BND	C	[SL4.0CH07:60620049[C	3	0	57
SL4.0ch07	60460655	MantaBND:26:23508:23511:0:0:0:1	SL4.0CH10	8277905	BND	T	]SL4.0CH10:8277905]T	1	0	59
SL4.0ch07	60460668	MantaBND:430512:0:1:0:0:0:0	SL4.0CH10	8277898	BND	T	]SL4.0CH10:8277898]T	1	0	59
SL4.0ch07	60471453	MantaBND:173631:0:1:0:0:0:0	SL4.0CH02	53211438	BND	T	T]SL4.0CH02:53211438]	1	0	59
SL4.0ch07	60471558	MantaBND:178316:0:1:0:0:0:0	SL4.0CH02	53211438	BND	A	A]SL4.0CH02:53211438]	2	0	58
SL4.0ch07	60491664	MantaBND:26:14189:14190:0:2:0:1	SL4.0CH09	61320389	BND	T	T]SL4.0CH09:61320389]	4	0	56
SL4.0ch07	60504532	MantaBND:26:16008:16009:0:0:0:0	SL4.0CH09	14000543	BND	A	[SL4.0CH09:14000543[A	1	0	59
SL4.0ch07	60504535	MantaBND:143:12073:12076:0:0:0:0	SL4.0CH09	14000543	BND	C	[SL4.0CH09:14000543[C	1	0	59
SL4.0ch07	60504542	MantaBND:156527:2:7:0:0:0:0	SL4.0CH09	14000543	BND	T	[SL4.0CH09:14000543[T	1	0	59
SL4.0ch07	60504826	MantaBND:156527:2:6:2:0:0:1	SL4.0CH07	60621175	BND	C	C]SL4.0CH07:60621175]	4	0	56
SL4.0ch07	60620032	MantaBND:151:15648:15649:0:0:0:0	SL4.0CH07	60438527	BND	A	[SL4.0CH07:60438527[A	4	0	56
SL4.0ch07	60620049	MantaBND:476944:0:1:0:0:0:1	SL4.0CH07	60438544	BND	G	[SL4.0CH07:60438544[G,[SL4.0CH07:60438545[G,[SL4.0CH07:60438529[G	1	0	55
SL4.0ch07	60620084	MantaBND:143:12075:12085:0:0:0:0	SL4.0CH07	60438541	BND	C	[SL4.0CH07:60438541[C	1	0	59
SL4.0ch07	60621175	MantaBND:156527:2:6:2:0:0:0	SL4.0CH07	60504826	BND	T	T]SL4.0CH07:60504826]	4	0	56
SL4.0ch07	60621569	MantaBND:156527:6:9:0:1:0:1	SL4.0CH11	52807870	BND	T	TCAT[SL4.0CH11:52807870[	4	0	56
SL4.0ch07	60725868	MantaBND:188492:6:7:0:0:0:0	SL4.0CH04	30310519	BND	A	[SL4.0CH04:30310519[ATA	1	0	59
SL4.0ch07	60797955	MantaBND:26:22179:22187:0:0:0:0	SL4.0CH04	30831468	BND	C	C]SL4.0CH04:30831468]	2	0	58
SL4.0ch07	61019771	MantaBND:254239:0:1:1:0:0:1	SL4.0CH04	62708818	BND	A	[SL4.0CH04:62708818[A	1	0	59
SL4.0ch07	61019793	MantaBND:254239:0:1:0:0:0:1	SL4.0CH04	62709133	BND	G	G]SL4.0CH04:62709133]	1	0	59
SL4.0ch07	61298148	MantaBND:32:12785:12842:0:0:0:1	SL4.0CH07	60382310	BND	T	[SL4.0CH07:60382310[T	1	0	59
SL4.0ch07	61397977	MantaBND:80049:0:1:0:0:0:1	SL4.0CH01	68662286	BND	A	ATGTTAAATTAGGTCTTAGGCCTAACTCACACTCCAAAAGCTAGCTTTAACAGTA[SL4.0CH01:68662286[	3	0	57
SL4.0ch07	61608876	MantaBND:165129:0:2:0:0:0:0	SL4.0CH02	39527410	BND	T	T[SL4.0CH02:39527410[	3	0	57
SL4.0ch07	61771848	MantaBND:152059:0:1:1:3:0:0	SL4.0CH02	31638273	BND	T	T]SL4.0CH02:31638273]	1	0	59
SL4.0ch07	62191989	MantaBND:98986:3:8:0:0:0:1	SL4.0CH03	23848916	BND	A	A]SL4.0CH03:23848916]	1	0	59
SL4.0ch07	62205655	MantaBND:434380:0:1:0:0:0:0	SL4.0CH10	4885880	BND	T	T[SL4.0CH10:4885880[	1	0	59
SL4.0ch07	62215056	MantaBND:273234:1:3:0:0:0:0	SL4.0CH05	20148205	BND	A	]SL4.0CH05:20148205]A	1	0	59
SL4.0ch07	62322907	MantaBND:151:5848:5861:0:0:0:0	SL4.0CH06	4177196	BND	C	]SL4.0CH06:4177196]C	1	0	59
SL4.0ch07	62323251	MantaBND:162:2750:9012:0:0:0:1	SL4.0CH04	61738390	BND	T	T[SL4.0CH04:61738390[	3	0	57
SL4.0ch07	62323265	MantaBND:151:5861:6114:0:0:0:1	SL4.0CH04	61738364	BND	T	T[SL4.0CH04:61738364[	1	0	59
SL4.0ch07	62446688	MantaBND:428247:1:2:0:0:0:1	SL4.0CH06	6933757	BND	T	]SL4.0CH06:6933757]T,]SL4.0CH06:6933761]T	1	0	59
SL4.0ch07	62521701	MantaBND:562731:0:0:4:0:0:1	SL4.0CH07	62522051	BND	T	T]SL4.0CH07:62522051]	1	0	59
SL4.0ch07	62522051	MantaBND:562731:0:0:4:0:0:0	SL4.0CH07	62521701	BND	G	G]SL4.0CH07:62521701]	1	0	59
SL4.0ch07	62562708	MantaBND:98118:1:2:0:0:0:1	SL4.0CH03	37609757	BND	G	[SL4.0CH03:37609757[G	1	0	59
SL4.0ch07	62610476	MantaBND:562750:0:1:0:0:0:0	SL4.0CH07	62613889	BND	G	G]SL4.0CH07:62613889]	4	0	56
SL4.0ch07	62610616	MantaBND:562750:0:1:1:0:0:0	SL4.0CH07	62613406	BND	G	[SL4.0CH07:62613406[G	4	0	56
SL4.0ch07	62613405	MantaBND:562750:0:1:1:0:0:1	SL4.0CH07	62610617	BND	C	[SL4.0CH07:62610617[C	4	0	56
SL4.0ch07	62613888	MantaBND:562750:0:1:0:0:0:1	SL4.0CH07	62610477	BND	T	T]SL4.0CH07:62610477]	4	0	56
SL4.0ch07	62683003	MantaBND:166392:0:3:0:0:0:1	SL4.0CH02	40472099	BND	C	C[SL4.0CH02:40472099[	19	3	38
SL4.0ch07	62815427	MantaBND:559474:0:1:0:0:0:1	SL4.0CH08	55767970	BND	T	]SL4.0CH08:55767970]TAATT	2	0	58
SL4.0ch07	62863837	MantaBND:151:8434:13486:0:0:0:0	SL4.0CH10	45433572	BND	G	[SL4.0CH10:45433572[G	1	0	59
SL4.0ch07	62894707	MantaBND:340971:1:5:1:0:0:0	SL4.0CH10	5585172	BND	C	C[SL4.0CH10:5585172[	2	0	58
SL4.0ch07	63017282	MantaBND:307651:0:1:2:0:0:0	SL4.0CH07	63018592	BND	A	[SL4.0CH07:63018592[A	2	4	54
SL4.0ch07	63017710	MantaBND:532530:4:4:10:0:0:0	SL4.0CH07	63018746	BND	G	[SL4.0CH07:63018746[G	0	2	58
SL4.0ch07	63017716	MantaBND:307651:0:1:5:0:0:0	SL4.0CH07	63018774	BND	G	[SL4.0CH07:63018774[G	0	2	58
SL4.0ch07	63018591	MantaBND:307651:0:1:2:0:0:1	SL4.0CH07	63017283	BND	T	[SL4.0CH07:63017283[T	2	4	54
SL4.0ch07	63018746	MantaBND:532530:4:4:10:0:0:1	SL4.0CH07	63017710	BND	A	[SL4.0CH07:63017710[A	0	2	58
SL4.0ch07	63018774	MantaBND:307651:0:1:5:0:0:1	SL4.0CH07	63017716	BND	T	[SL4.0CH07:63017716[T	0	2	58
SL4.0ch07	63030594	MantaBND:177442:0:1:0:0:0:1	SL4.0CH03	3628515	BND	C	C]SL4.0CH03:3628515]	1	0	59
SL4.0ch07	63425829	MantaBND:151:3026:6146:0:1:0:1	SL4.0CH06	1215320	BND	A	]SL4.0CH06:1215320]A	4	18	38
SL4.0ch07	63546557	MantaBND:128:5985:24598:1:0:0:1	SL4.0CH09	7202758	BND	C	CC[SL4.0CH09:7202758[	1	0	59
SL4.0ch07	63594884	MantaBND:35237:0:1:0:0:0:0	SL4.0CH01	27888450	BND	T	T]SL4.0CH01:27888450]	1	0	59
SL4.0ch07	63603093	MantaBND:32:18083:18091:0:0:0:1	SL4.0CH07	63610041	BND	G	G]SL4.0CH07:63610041]	0	3	57
SL4.0ch07	63610035	MantaBND:32:18083:18091:0:0:0:0	SL4.0CH07	63603099	BND	T	T]SL4.0CH07:63603099]	0	3	57
SL4.0ch07	63690093	MantaBND:59347:7:8:0:0:0:0	SL4.0CH10	58324804	BND	T	T[SL4.0CH10:58324804[	1	0	59
SL4.0ch07	63777655	MantaBND:89282:12:34:0:2:0:1	SL4.0CH03	5625741	BND	G	]SL4.0CH03:5625741]G	8	0	52
SL4.0ch07	64506188	MantaBND:76705:0:2:0:4:0:1	SL4.0CH01	73801520	BND	A	[SL4.0CH01:73801520[A	1	0	59
SL4.0ch07	64506189	MantaBND:174630:0:2:0:2:0:1	SL4.0CH02	48786035	BND	T	[SL4.0CH02:48786035[T	11	0	49
SL4.0ch07	64506189	MantaBND:174630:2:5:0:2:0:0	SL4.0CH09	4582676	BND	T	[SL4.0CH09:4582676[T,]SL4.0CH09:1249574]T,[SL4.0CH07:42532926[T	4	0	54
SL4.0ch07	64506189	MantaBND:76705:2:10:0:2:0:0	SL4.0CH09	4582676	BND	T	[SL4.0CH09:4582676[T	2	0	58
SL4.0ch07	64506189	MantaBND:130581:1:7:0:2:0:0	SL4.0CH09	4582676	BND	T	[SL4.0CH09:4582676[T,]SL4.0CH06:44069127]T	0	0	57
SL4.0ch07	65014185	MantaBND:173895:0:1:0:0:0:1	SL4.0CH02	47925997	BND	T	TTAAGGAGAAG]SL4.0CH02:47925997]	2	0	58
SL4.0ch07	65506225	MantaBND:26:16916:16930:0:2:0:0	SL4.0CH08	55569095	BND	A	AGTTTTACAATAA]SL4.0CH08:55569095]	8	0	52
SL4.0ch07	67883541	MantaBND:192453:0:1:0:0:0:1	SL4.0CH03	65298404	BND	T	T]SL4.0CH03:65298404]	1	0	59
SL4.0ch07	67883646	MantaBND:243217:0:1:0:0:0:1	SL4.0CH03	65298490	BND	C	C]SL4.0CH03:65298490]	10	1	49
SL4.0ch08	90300	MantaBND:454450:1:2:0:0:0:1	SL4.0CH06	36940254	BND	A	]SL4.0CH06:36940254]A	1	0	59
SL4.0ch08	90317	MantaBND:480474:0:3:0:0:0:1	SL4.0CH06	36940234	BND	T	]SL4.0CH06:36940234]T	3	0	57
SL4.0ch08	90329	MantaBND:374650:1:2:0:0:0:1	SL4.0CH06	36940240	BND	T	]SL4.0CH06:36940240]T	5	0	55
SL4.0ch08	408015	MantaBND:151:14285:14286:0:0:0:0	SL4.0CH05	10325715	BND	G	G]SL4.0CH05:10325715]	1	0	59
SL4.0ch08	554767	MantaBND:15270:1:3:0:0:0:1	SL4.0CH09	6239018	BND	T	[SL4.0CH09:6239018[T	1	0	59
SL4.0ch08	1269337	MantaBND:487612:0:1:0:0:0:1	SL4.0CH12	28169437	BND	A	[SL4.0CH12:28169437[A	3	0	57
SL4.0ch08	1269758	MantaBND:487612:1:2:0:0:0:0	SL4.0CH12	28169365	BND	C	CAC]SL4.0CH12:28169365]	3	0	57
SL4.0ch08	1392896	MantaBND:487717:0:1:0:0:0:0	SL4.0CH10	1925040	BND	G	[SL4.0CH10:1925040[G	1	0	59
SL4.0ch08	2998552	MantaBND:489115:0:1:0:0:0:1	SL4.0CH10	22521692	BND	A	A[SL4.0CH10:22521692[	1	0	59
SL4.0ch08	3576987	MantaBND:245748:0:1:0:0:0:1	SL4.0CH03	57721593	BND	A	[SL4.0CH03:57721593[A	1	0	59
SL4.0ch08	4779649	MantaBND:162:12580:12695:0:1:0:1	SL4.0CH06	4979983	BND	A	ACGGGTC[SL4.0CH06:4979983[	5	0	55
SL4.0ch08	8689985	MantaBND:152432:1:2:0:0:0:1	SL4.0CH02	51626517	BND	T	]SL4.0CH02:51626517]T	1	0	59
SL4.0ch08	9140504	MantaBND:162:16017:16025:0:0:0:0	SL4.0CH04	53257104	BND	T	T[SL4.0CH04:53257104[	1	0	59
SL4.0ch08	9671903	MantaBND:233277:1:2:0:1:0:0	SL4.0CH08	10368651	BND	A	A]SL4.0CH08:10368651]	1	0	59
SL4.0ch08	9772800	MantaBND:627313:0:1:0:0:0:1	SL4.0CH08	10262861	BND	A	A]SL4.0CH08:10262861]	3	0	57
SL4.0ch08	10262819	MantaBND:627313:0:1:0:0:0:0	SL4.0CH08	9772842	BND	T	T]SL4.0CH08:9772842]	3	0	57
SL4.0ch08	10368623	MantaBND:233277:1:2:0:1:0:1	SL4.0CH08	9671931	BND	A	A]SL4.0CH08:9671931]	1	0	59
SL4.0ch08	10470462	MantaBND:151:14407:14408:0:0:0:1	SL4.0CH06	3067801	BND	C	]SL4.0CH06:3067801]C,]SL4.0CH06:3067784]C,]SL4.0CH06:3067757]C	1	0	59
SL4.0ch08	10802988	MantaBND:183047:1:2:0:0:0:0	SL4.0CH09	57339354	BND	T	T[SL4.0CH09:57339354[	1	0	59
SL4.0ch08	10803008	MantaBND:23019:9:11:0:0:0:0	SL4.0CH09	57339369	BND	A	A[SL4.0CH09:57339369[	2	0	58
SL4.0ch08	14213359	MantaBND:159844:8:9:0:0:0:1	SL4.0CH06	21555693	BND	A	[SL4.0CH06:21555693[A	9	0	51
SL4.0ch08	15375954	MantaBND:553733:0:1:0:5:0:1	SL4.0CH10	50435356	BND	A	A[SL4.0CH10:50435356[	1	0	59
SL4.0ch08	15639701	MantaBND:151:18970:18971:0:0:0:1	SL4.0CH07	20318196	BND	A	A]SL4.0CH07:20318196]	21	0	39
SL4.0ch08	18777967	MantaBND:491163:0:2:0:0:0:0	SL4.0CH06	20069607	BND	C	C[SL4.0CH06:20069607[	3	0	57
SL4.0ch08	18777967	MantaBND:453598:0:1:0:0:0:0	SL4.0CH06	20069577	BND	C	C[SL4.0CH06:20069577[	2	0	58
SL4.0ch08	19178839	MantaBND:951237:0:1:0:0:0:0	SL4.0CH10	25847231	BND	T	TA]SL4.0CH10:25847231]	1	0	59
SL4.0ch08	20900451	MantaBND:208205:1:2:0:0:0:1	SL4.0CH06	14721723	BND	G	[SL4.0CH06:14721723[G	1	0	59
SL4.0ch08	21220359	MantaBND:26:31346:31350:0:0:0:1	SL4.0CH06	23252663	BND	C	CAGT[SL4.0CH06:23252663[,CAA[SL4.0CH06:23252662[	1	0	59
SL4.0ch08	21998883	MantaBND:219257:2:7:0:0:0:0	SL4.0CH12	50378562	BND	A	ATTAG[SL4.0CH12:50378562[	3	0	57
SL4.0ch08	22005939	MantaBND:61998:1:5:0:0:0:1	SL4.0CH07	38500704	BND	T	]SL4.0CH07:38500704]T	1	0	59
SL4.0ch08	23107933	MantaBND:375787:0:1:0:0:0:1	SL4.0CH05	33619788	BND	C	C]SL4.0CH05:33619788]	3	0	57
SL4.0ch08	25044119	MantaBND:239077:5:7:0:0:0:1	SL4.0CH04	19623771	BND	A	]SL4.0CH04:19623771]A	1	0	59
SL4.0ch08	26196957	MantaBND:71209:1:2:0:0:0:0	SL4.0CH06	4833959	BND	A	]SL4.0CH06:4833959]A	1	0	59
SL4.0ch08	31356536	MantaBND:346357:0:1:0:0:0:1	SL4.0CH05	60316637	BND	T	T]SL4.0CH05:60316637]	1	0	59
SL4.0ch08	31875133	MantaBND:151:11330:11331:0:0:0:1	SL4.0CH01	12688413	BND	A	]SL4.0CH01:12688413]A	1	0	59
SL4.0ch08	31875160	MantaBND:32:677:685:0:0:0:1	SL4.0CH01	12688396	BND	T	]SL4.0CH01:12688396]T	1	0	59
SL4.0ch08	31875195	MantaBND:32:685:687:0:0:0:0	SL4.0CH12	3739201	BND	T	[SL4.0CH12:3739201[T	3	0	57
SL4.0ch08	31875216	MantaBND:26:6321:6344:0:0:0:0	SL4.0CH12	3739201	BND	T	[SL4.0CH12:3739201[T	1	0	59
SL4.0ch08	31875227	MantaBND:123:12233:12234:0:0:0:0	SL4.0CH12	3739201	BND	T	[SL4.0CH12:3739201[T	1	0	59
SL4.0ch08	33736318	MantaBND:467859:0:1:0:3:0:0	SL4.0CH09	38936723	BND	A	[SL4.0CH09:38936723[A	1	0	59
SL4.0ch08	34196803	MantaBND:307784:0:3:0:0:0:1	SL4.0CH04	41069868	BND	T	]SL4.0CH04:41069868]AGGT	21	0	39
SL4.0ch08	35247565	MantaBND:154568:0:1:0:0:0:1	SL4.0CH03	18841236	BND	T	T[SL4.0CH03:18841236[	1	0	59
SL4.0ch08	36091523	MantaBND:173596:0:2:0:0:0:0	SL4.0CH03	39188387	BND	G	[SL4.0CH03:39188387[G	1	0	59
SL4.0ch08	36873047	MantaBND:151:18968:18973:0:0:0:1	SL4.0CH04	41790441	BND	T	[SL4.0CH04:41790441[GGAATGAAAGAAAGAAAAAGTTGCTCCGCAGCTCGCCCAGAAGAAGATAGACCCGCCACTATAGATT	20	0	40
SL4.0ch08	36873047	MantaBND:143:24764:24770:0:0:0:0	SL4.0CH11	1688197	BND	T	]SL4.0CH11:1688197]ACTATAGATT	3	0	57
SL4.0ch08	37430565	MantaBND:286476:1:7:0:0:0:1	SL4.0CH04	25662140	BND	T	[SL4.0CH04:25662140[T	1	0	59
SL4.0ch08	38939734	MantaBND:126196:0:1:0:0:0:1	SL4.0CH02	6471308	BND	A	]SL4.0CH02:6471308]CA	1	0	59
SL4.0ch08	46402648	MantaBND:328700:0:2:0:0:0:1	SL4.0CH04	58281356	BND	C	[SL4.0CH04:58281356[C	27	0	33
SL4.0ch08	46403650	MantaBND:328700:0:1:0:2:0:1	SL4.0CH04	58281364	BND	G	G]SL4.0CH04:58281364]	20	0	40
SL4.0ch08	47234801	MantaBND:556175:1:2:0:0:0:1	SL4.0CH10	53565830	BND	G	]SL4.0CH10:53565830]G	1	0	59
SL4.0ch08	49451995	MantaBND:625166:0:1:0:2:0:1	SL4.0CH09	53842849	BND	C	C[SL4.0CH09:53842849[	2	1	57
SL4.0ch08	49914627	MantaBND:487448:0:1:0:0:0:1	SL4.0CH06	18059014	BND	A	]SL4.0CH06:18059014]A	5	0	55
SL4.0ch08	51281632	MantaBND:151:2628:2660:0:0:0:1	SL4.0CH01	37170352	BND	A	A[SL4.0CH01:37170352[	1	0	59
SL4.0ch08	51758443	MantaBND:162:6842:17761:0:1:0:0	SL4.0CH08	52036500	BND	C	[SL4.0CH08:52036500[ATATC	1	0	59
SL4.0ch08	51758512	MantaBND:26:2934:15981:0:0:0:0	SL4.0CH08	52036381	BND	C	[SL4.0CH08:52036381[C	1	0	59
SL4.0ch08	52036381	MantaBND:26:2934:15981:0:0:0:1	SL4.0CH08	51758512	BND	C	[SL4.0CH08:51758512[C	1	0	59
SL4.0ch08	52036500	MantaBND:162:6842:17761:0:1:0:1	SL4.0CH08	51758443	BND	A	[SL4.0CH08:51758443[ATATA	1	0	59
SL4.0ch08	53235505	MantaBND:195206:1:2:0:0:0:0	SL4.0CH09	14313953	BND	C	]SL4.0CH09:14313953]C,]SL4.0CH09:14313941]C	3	0	57
SL4.0ch08	53943259	MantaBND:151:11357:11359:1:0:0:1	SL4.0CH09	49170928	BND	T	[SL4.0CH09:49170928[T	3	0	57
SL4.0ch08	53981703	MantaBND:469063:2:6:0:0:0:1	SL4.0CH07	59345398	BND	A	[SL4.0CH07:59345398[A	1	0	59
SL4.0ch08	55569095	MantaBND:26:16916:16930:0:2:0:1	SL4.0CH07	65506225	BND	T	TTTATTGTAAAAC]SL4.0CH07:65506225]	8	0	52
SL4.0ch08	55761286	MantaBND:244873:1:3:0:0:0:1	SL4.0CH04	19378786	BND	G	G[SL4.0CH04:19378786[	1	0	59
SL4.0ch08	55767970	MantaBND:559474:0:1:0:0:0:0	SL4.0CH07	62815427	BND	C	CTAAT[SL4.0CH07:62815427[	2	0	58
SL4.0ch08	56237156	MantaBND:158766:2:5:0:0:0:1	SL4.0CH09	2406011	BND	C	]SL4.0CH09:2406011]GGGC	2	0	58
SL4.0ch08	57605893	MantaBND:118552:13:29:1:0:0:1	SL4.0CH08	57606705	BND	C	C]SL4.0CH08:57606705]	1	0	59
SL4.0ch08	57606645	MantaBND:118552:28:29:0:2:0:0	SL4.0CH03	28346111	BND	A	]SL4.0CH03:28346111]A	3	0	57
SL4.0ch08	57606705	MantaBND:118552:13:29:1:0:0:0	SL4.0CH08	57605893	BND	A	A]SL4.0CH08:57605893]	1	0	59
SL4.0ch08	57902135	MantaBND:151:5620:5627:0:3:0:0	SL4.0CH03	56478912	BND	A	A[SL4.0CH03:56478912[	52	0	8
SL4.0ch08	60291285	MantaBND:202971:0:2:0:0:0:1	SL4.0CH03	51325246	BND	G	G[SL4.0CH03:51325246[	1	0	59
SL4.0ch08	60864020	MantaBND:151:4928:4929:0:0:0:1	SL4.0CH05	8127125	BND	G	G]SL4.0CH05:8127125]	9	0	51
SL4.0ch08	60945607	MantaBND:240782:1:2:0:0:0:1	SL4.0CH10	64532903	BND	T	[SL4.0CH10:64532903[T	1	0	59
SL4.0ch08	61075996	MantaBND:32:15725:15746:0:0:0:1	SL4.0CH11	16135209	BND	T	]SL4.0CH11:16135209]T	1	0	59
SL4.0ch08	61152882	MantaBND:252413:0:1:0:0:0:1	SL4.0CH04	124372	BND	C	C]SL4.0CH04:124372]	1	0	59
SL4.0ch08	63977339	MantaBND:237042:3:4:0:0:0:1	SL4.0CH06	6858925	BND	G	GTTGTATTGTTTTTAGAAGCTACAGCAATAGTAA[SL4.0CH06:6858925[,GTTGTATTGTTTTTAGAAGCTACAACAATAGTAATG[SL4.0CH06:6858927[	8	0	52
SL4.0ch08	63977339	MantaBND:237042:3:4:1:5:0:0	SL4.0CH06	6858927	BND	G	GTTGTATTGTTTTTAGAAGCTACAACAATAGTAATG[SL4.0CH06:6858927[	1	0	59
SL4.0ch08	63995243	MantaBND:334507:0:1:0:0:0:0	SL4.0CH05	105	BND	G	G[SL4.0CH05:105[	2	0	58
SL4.0ch08	63995357	MantaBND:321908:0:1:0:0:0:0	SL4.0CH05	1	BND	A	A[SL4.0CH05:1[	4	1	55
SL4.0ch09	39591	MantaBND:7086:3:6:0:0:0:0	SL4.0CH03	4598421	BND	A	[SL4.0CH03:4598421[A	1	0	59
SL4.0ch09	39651	MantaBND:7086:1:6:1:0:0:0	SL4.0CH09	2722423	BND	G	[SL4.0CH09:2722423[G	4	0	56
SL4.0ch09	335230	MantaBND:26:19155:19158:0:0:0:1	SL4.0CH09	552466	BND	T	T]SL4.0CH09:552466]	7	1	52
SL4.0ch09	335252	MantaBND:320587:11:17:0:0:0:1	SL4.0CH09	552187	BND	T	T]SL4.0CH09:552187]	1	12	47
SL4.0ch09	552183	MantaBND:320587:11:17:0:0:0:0	SL4.0CH09	335256	BND	G	G]SL4.0CH09:335256]	1	12	47
SL4.0ch09	552466	MantaBND:26:19155:19158:0:0:0:0	SL4.0CH09	335230	BND	C	C]SL4.0CH09:335230]	7	1	52
SL4.0ch09	831749	MantaBND:270061:1:4:0:0:0:0	SL4.0CH09	850844	BND	A	[SL4.0CH09:850844[CAA	5	0	55
SL4.0ch09	850844	MantaBND:270061:1:4:0:0:0:1	SL4.0CH09	831749	BND	A	[SL4.0CH09:831749[TGA	5	0	55
SL4.0ch09	1091211	MantaBND:632061:0:1:0:0:0:0	SL4.0CH10	62303384	BND	C	C]SL4.0CH10:62303384]	1	0	59
SL4.0ch09	1249574	MantaBND:130581:1:8:0:4:0:0	SL4.0CH07	64506189	BND	C	C[SL4.0CH07:64506189[	1	0	59
SL4.0ch09	2262342	MantaBND:250980:0:1:0:1:0:0	SL4.0CH03	63510747	BND	G	GG[SL4.0CH03:63510747[	1	0	59
SL4.0ch09	2392600	MantaBND:26:13810:13811:0:0:0:1	SL4.0CH04	56221308	BND	T	T]SL4.0CH04:56221308]	1	0	59
SL4.0ch09	2406011	MantaBND:158766:2:5:0:0:0:0	SL4.0CH08	56237156	BND	A	AGGG[SL4.0CH08:56237156[	2	0	58
SL4.0ch09	2442490	MantaBND:379447:2:3:0:1:0:0	SL4.0CH10	3829499	BND	A	]SL4.0CH10:3829499]A	1	0	59
SL4.0ch09	2703911	MantaBND:107619:2:4:0:0:0:0	SL4.0CH09	3723587	BND	A	ACTATTAG]SL4.0CH09:3723587]	2	0	58
SL4.0ch09	2709657	MantaBND:143:13615:13723:0:0:0:0	SL4.0CH09	3728614	BND	A	[SL4.0CH09:3728614[A,[SL4.0CH09:3728609[A	2	0	57
SL4.0ch09	2709662	MantaBND:151:10380:10405:0:0:0:0	SL4.0CH09	3728616	BND	C	[SL4.0CH09:3728616[C	1	0	59
SL4.0ch09	2719350	MantaBND:12500:1:13:0:0:0:1	SL4.0CH02	45107498	BND	T	[SL4.0CH02:45107498[T	1	0	59
SL4.0ch09	2719358	MantaBND:26:3132:3144:0:0:0:1	SL4.0CH02	45107479	BND	G	[SL4.0CH02:45107479[G	2	0	58
SL4.0ch09	2721497	MantaBND:143:13694:13698:0:0:0:0	SL4.0CH02	44078382	BND	A	[SL4.0CH02:44078382[ATA	2	0	58
SL4.0ch09	2721501	MantaBND:151:10382:10383:0:0:0:1	SL4.0CH02	44078691	BND	T	T]SL4.0CH02:44078691]	5	0	55
SL4.0ch09	2722423	MantaBND:7086:1:6:1:0:0:1	SL4.0CH09	39651	BND	T	[SL4.0CH09:39651[T	4	0	56
SL4.0ch09	2722437	MantaBND:143:13929:13930:0:0:0:0	SL4.0CH01	4311461	BND	T	[SL4.0CH01:4311461[T	1	0	59
SL4.0ch09	2734754	MantaBND:14292:0:1:0:0:0:1	SL4.0CH01	4313399	BND	A	]SL4.0CH01:4313399]AA	1	0	59
SL4.0ch09	3723587	MantaBND:107619:2:4:0:0:0:1	SL4.0CH09	2703911	BND	A	ACTAATAG]SL4.0CH09:2703911]	2	0	58
SL4.0ch09	3728609	MantaBND:26:16507:16509:0:0:0:1	SL4.0CH09	2709657	BND	T	[SL4.0CH09:2709657[T	1	0	59
SL4.0ch09	3728614	MantaBND:143:13615:13723:0:0:0:1	SL4.0CH09	2709657	BND	T	[SL4.0CH09:2709657[T	2	0	58
SL4.0ch09	3728616	MantaBND:151:10380:10405:0:0:0:1	SL4.0CH09	2709662	BND	T	[SL4.0CH09:2709662[T,[SL4.0CH09:2709671[T	1	0	58
SL4.0ch09	3731733	MantaBND:151:10399:10406:0:4:0:1	SL4.0CH07	9732510	BND	T	T[SL4.0CH07:9732510[	1	0	59
SL4.0ch09	4065598	MantaBND:642383:0:0:3:0:0:0	SL4.0CH09	4065722	BND	T	T]SL4.0CH09:4065722]	0	1	59
SL4.0ch09	4065713	MantaBND:642383:0:0:3:0:0:1	SL4.0CH09	4065607	BND	T	T]SL4.0CH09:4065607]	0	1	59
SL4.0ch09	4118126	MantaBND:107191:0:1:0:0:0:0	SL4.0CH09	4119791	BND	A	[SL4.0CH09:4119791[AATTACTTTATCTTCTCCCCTCCACAGAAAAAAATATACAAATAGCAAAA	1	0	59
SL4.0ch09	4119791	MantaBND:107191:0:1:0:0:0:1	SL4.0CH09	4118126	BND	A	[SL4.0CH09:4118126[TTTGCTATTTGTATATTTTTTTCTGTGGAGGGGAGAAGATAAAGTAATTA	1	0	59
SL4.0ch09	4131968	MantaBND:143:18635:18636:0:0:0:1	SL4.0CH01	86743417	BND	A	[SL4.0CH01:86743417[A	1	0	59
SL4.0ch09	4401410	MantaBND:154712:4:5:0:0:0:0	SL4.0CH04	47297372	BND	A	A[SL4.0CH04:47297372[	1	0	59
SL4.0ch09	4582676	MantaBND:174630:2:5:0:2:0:1	SL4.0CH07	64506189	BND	A	[SL4.0CH07:64506189[A	6	0	54
SL4.0ch09	5022280	MantaBND:177736:20:29:1:0:0:1	SL4.0CH06	3053134	BND	A	]SL4.0CH06:3053134]TATA	2	0	58
SL4.0ch09	5026027	MantaBND:481013:0:2:0:0:0:1	SL4.0CH06	37836754	BND	A	]SL4.0CH06:37836754]A	1	0	59
SL4.0ch09	5121883	MantaBND:74251:2:3:0:0:0:0	SL4.0CH05	62561940	BND	C	C]SL4.0CH05:62561940]	1	0	59
SL4.0ch09	5279206	MantaBND:538742:0:1:0:0:0:1	SL4.0CH07	46652315	BND	A	A]SL4.0CH07:46652315]	1	0	59
SL4.0ch09	5504644	MantaBND:645355:0:1:0:0:0:0	SL4.0CH09	8973017	BND	T	[SL4.0CH09:8973017[T	1	0	59
SL4.0ch09	5562232	MantaBND:203616:4:5:0:1:0:0	SL4.0CH03	60209421	BND	A	A[SL4.0CH03:60209421[	2	1	57
SL4.0ch09	5964455	MantaBND:351530:0:1:0:1:0:1	SL4.0CH06	475091	BND	A	[SL4.0CH06:475091[A	1	0	59
SL4.0ch09	6156245	MantaBND:646083:0:1:0:0:0:0	SL4.0CH11	51735170	BND	A	A[SL4.0CH11:51735170[	1	0	59
SL4.0ch09	6239018	MantaBND:15270:1:3:0:0:0:0	SL4.0CH08	554767	BND	C	[SL4.0CH08:554767[C,[SL4.0CH08:554751[C	1	0	59
SL4.0ch09	7202758	MantaBND:128:5985:24598:1:0:0:0	SL4.0CH07	63546557	BND	T	]SL4.0CH07:63546557]CT	1	0	59
SL4.0ch09	7314588	MantaBND:547423:0:1:0:0:0:0	SL4.0CH07	51561555	BND	T	]SL4.0CH07:51561555]T	1	0	59
SL4.0ch09	7450730	MantaBND:174677:0:1:0:0:0:1	SL4.0CH02	36048280	BND	A	]SL4.0CH02:36048280]A	1	0	59
SL4.0ch09	7451081	MantaBND:174677:0:1:1:0:0:0	SL4.0CH02	36048055	BND	C	C[SL4.0CH02:36048055[	1	0	59
SL4.0ch09	7895669	MantaBND:109395:1:2:0:0:0:0	SL4.0CH04	57633315	BND	C	[SL4.0CH04:57633315[C	1	0	59
SL4.0ch09	8863181	MantaBND:645323:0:1:0:0:0:1	SL4.0CH10	27340250	BND	T	T]SL4.0CH10:27340250]	1	0	59
SL4.0ch09	8973017	MantaBND:645355:0:1:0:0:0:1	SL4.0CH09	5504644	BND	C	[SL4.0CH09:5504644[C	1	0	59
SL4.0ch09	9301153	MantaBND:47053:1:2:0:1:0:1	SL4.0CH05	41852269	BND	A	ATGC[SL4.0CH05:41852269[	3	0	57
SL4.0ch09	9717666	MantaBND:151:9371:9372:0:0:0:0	SL4.0CH06	2343951	BND	G	G[SL4.0CH06:2343951[	1	0	59
SL4.0ch09	10068984	MantaBND:1056146:0:1:0:1:0:0	SL4.0CH09	12313659	BND	A	A]SL4.0CH09:12313659]	0	1	59
SL4.0ch09	10511311	MantaBND:48395:3:4:0:0:0:0	SL4.0CH01	63804082	BND	T	[SL4.0CH01:63804082[T	2	0	58
SL4.0ch09	10604201	MantaBND:167849:1:2:0:0:0:0	SL4.0CH02	40258734	BND	G	]SL4.0CH02:40258734]G	2	0	58
SL4.0ch09	10606068	MantaBND:283181:0:1:0:1:0:0	SL4.0CH04	21015047	BND	G	G[SL4.0CH04:21015047[	1	0	59
SL4.0ch09	11662726	MantaBND:655842:0:1:2:0:0:1	SL4.0CH09	11714956	BND	A	[SL4.0CH09:11714956[CAAACAAGAAA	4	2	54
SL4.0ch09	11662730	MantaBND:655842:0:1:0:0:0:0	SL4.0CH09	11714955	BND	T	TGTAAT]SL4.0CH09:11714955],TGTCAT]SL4.0CH09:11714955]	0	2	57
SL4.0ch09	11711663	MantaBND:151:4329:4346:0:0:0:1	SL4.0CH03	54145786	BND	C	[SL4.0CH03:54145786[C	1	0	59
SL4.0ch09	11714955	MantaBND:655842:0:1:0:0:0:1	SL4.0CH09	11662730	BND	A	AATTAC]SL4.0CH09:11662730],AATGAC]SL4.0CH09:11662730]	0	2	57
SL4.0ch09	11714956	MantaBND:655842:0:1:2:0:0:0	SL4.0CH09	11662726	BND	C	[SL4.0CH09:11662726[TTCTTGTTTGC	4	2	54
SL4.0ch09	11867870	MantaBND:656318:0:0:1:1:0:1	SL4.0CH09	11868277	BND	A	A]SL4.0CH09:11868277]	1	4	55
SL4.0ch09	11867871	MantaBND:656318:0:0:3:0:0:0	SL4.0CH09	11868286	BND	T	[SL4.0CH09:11868286[T	5	0	55
SL4.0ch09	11868277	MantaBND:656318:0:0:1:1:0:0	SL4.0CH09	11867870	BND	T	T]SL4.0CH09:11867870]	1	4	55
SL4.0ch09	11868283	MantaBND:656318:0:0:3:0:0:1	SL4.0CH09	11867874	BND	T	[SL4.0CH09:11867874[T	5	0	55
SL4.0ch09	11964546	MantaBND:151:11185:11189:0:0:0:0	SL4.0CH07	16824166	BND	A	]SL4.0CH07:16824166]A	1	0	59
SL4.0ch09	12047325	MantaBND:656148:0:2:0:0:0:0	SL4.0CH12	2501645	BND	T	T]SL4.0CH12:2501645]	3	0	57
SL4.0ch09	12313656	MantaBND:1056146:0:1:0:1:0:1	SL4.0CH09	10068987	BND	A	A]SL4.0CH09:10068987]	0	1	59
SL4.0ch09	14000543	MantaBND:156527:2:7:0:0:0:1	SL4.0CH07	60504542	BND	G	[SL4.0CH07:60504542[G,[SL4.0CH07:60504528[G,[SL4.0CH07:60504535[G,[SL4.0CH07:60504532[G,[SL4.0CH07:60504543[G,[SL4.0CH07:60504537[G	1	0	57
SL4.0ch09	14313953	MantaBND:195206:1:2:0:0:0:1	SL4.0CH08	53235505	BND	A	A[SL4.0CH08:53235505[	3	0	57
SL4.0ch09	14816729	MantaBND:186786:0:1:0:0:0:1	SL4.0CH03	8520593	BND	A	A]SL4.0CH03:8520593]	1	0	59
SL4.0ch09	14851654	MantaBND:661292:0:1:0:0:0:0	SL4.0CH09	14858876	BND	G	G]SL4.0CH09:14858876]	0	3	57
SL4.0ch09	14858875	MantaBND:661292:0:1:0:0:0:1	SL4.0CH09	14851655	BND	G	G]SL4.0CH09:14851655]	0	3	57
SL4.0ch09	15653281	MantaBND:662683:0:1:0:2:0:1	SL4.0CH09	24345997	BND	T	[SL4.0CH09:24345997[T	3	6	51
SL4.0ch09	15780579	MantaBND:662912:0:1:2:0:0:0	SL4.0CH09	15797440	BND	A	[SL4.0CH09:15797440[A	1	0	59
SL4.0ch09	15780598	MantaBND:662912:0:1:1:0:0:1	SL4.0CH09	15797353	BND	A	ACC]SL4.0CH09:15797353]	2	2	56
SL4.0ch09	15797353	MantaBND:662912:0:1:1:0:0:0	SL4.0CH09	15780598	BND	A	AGG]SL4.0CH09:15780598]	2	2	56
SL4.0ch09	15797440	MantaBND:662912:0:1:2:0:0:1	SL4.0CH09	15780579	BND	A	[SL4.0CH09:15780579[A	1	0	59
SL4.0ch09	15806362	MantaBND:459251:2:3:0:0:0:0	SL4.0CH09	15809044	BND	A	[SL4.0CH09:15809044[A	2	0	58
SL4.0ch09	15808245	MantaBND:663476:0:0:3:0:0:0	SL4.0CH09	15808387	BND	A	A]SL4.0CH09:15808387]	1	0	59
SL4.0ch09	15808387	MantaBND:663476:0:0:3:0:0:1	SL4.0CH09	15808245	BND	C	C]SL4.0CH09:15808245]	1	0	59
SL4.0ch09	15809044	MantaBND:459251:2:3:0:0:0:1	SL4.0CH09	15806362	BND	C	[SL4.0CH09:15806362[C	2	0	58
SL4.0ch09	16080401	MantaBND:151:11020:11021:0:1:0:1	SL4.0CH09	16126927	BND	T	TT]SL4.0CH09:16126927]	0	6	54
SL4.0ch09	16080418	MantaBND:151:11020:11021:1:3:0:0	SL4.0CH09	16126997	BND	C	[SL4.0CH09:16126997[C	1	5	54
SL4.0ch09	16126927	MantaBND:151:11020:11021:0:1:0:0	SL4.0CH09	16080401	BND	A	AA]SL4.0CH09:16080401]	0	6	54
SL4.0ch09	16126997	MantaBND:151:11020:11021:1:3:0:1	SL4.0CH09	16080418	BND	T	[SL4.0CH09:16080418[T	1	5	54
SL4.0ch09	16489644	MantaBND:84145:5:7:0:0:0:0	SL4.0CH09	16512465	BND	A	A]SL4.0CH09:16512465]	1	0	59
SL4.0ch09	16512465	MantaBND:84145:5:7:0:0:0:1	SL4.0CH09	16489644	BND	A	A]SL4.0CH09:16489644]	1	0	59
SL4.0ch09	16543691	MantaBND:128:32729:32732:0:0:0:0	SL4.0CH09	16546110	BND	T	T]SL4.0CH09:16546110]	2	0	58
SL4.0ch09	16543779	MantaBND:664875:0:1:1:0:0:1	SL4.0CH09	16546110	BND	T	T]SL4.0CH09:16546110]	2	0	58
SL4.0ch09	16546110	MantaBND:128:32729:32732:0:0:0:1	SL4.0CH09	16543691	BND	T	T]SL4.0CH09:16543691]	2	0	58
SL4.0ch09	16546110	MantaBND:664875:0:1:1:0:0:0	SL4.0CH09	16543779	BND	T	T]SL4.0CH09:16543779]	2	0	58
SL4.0ch09	16555673	MantaBND:118915:2:6:0:0:0:1	SL4.0CH04	16954347	BND	A	A[SL4.0CH04:16954347[	1	0	59
SL4.0ch09	16559212	MantaBND:151:4329:4339:0:0:0:0	SL4.0CH03	54145792	BND	A	[SL4.0CH03:54145792[A	1	0	59
SL4.0ch09	17386551	MantaBND:26:5118:18408:0:6:0:1	SL4.0CH11	30049627	BND	G	G]SL4.0CH11:30049627]	6	0	54
SL4.0ch09	17726357	MantaBND:666767:0:0:3:0:0:1	SL4.0CH09	17726451	BND	T	[SL4.0CH09:17726451[T	2	0	58
SL4.0ch09	17726451	MantaBND:666767:0:0:3:0:0:0	SL4.0CH09	17726357	BND	A	[SL4.0CH09:17726357[A	2	0	58
SL4.0ch09	20307114	MantaBND:191183:0:1:0:4:0:1	SL4.0CH03	16578915	BND	A	A]SL4.0CH03:16578915]	6	2	52
SL4.0ch09	21157697	MantaBND:671420:0:1:0:0:0:1	SL4.0CH09	21413894	BND	G	G]SL4.0CH09:21413894]	1	0	59
SL4.0ch09	21413894	MantaBND:671420:0:1:0:0:0:0	SL4.0CH09	21157697	BND	T	T]SL4.0CH09:21157697]	1	0	59
SL4.0ch09	22321371	MantaBND:247565:2:3:0:0:0:1	SL4.0CH07	50841220	BND	A	A]SL4.0CH07:50841220]	1	0	59
SL4.0ch09	22321404	MantaBND:247565:1:3:0:0:0:0	SL4.0CH07	50824713	BND	A	[SL4.0CH07:50824713[A	2	0	58
SL4.0ch09	23097284	MantaBND:531188:1:4:0:0:0:1	SL4.0CH11	38752361	BND	A	]SL4.0CH11:38752361]A	1	0	59
SL4.0ch09	24345993	MantaBND:662683:0:1:0:2:0:0	SL4.0CH09	15653285	BND	G	[SL4.0CH09:15653285[G	3	6	51
SL4.0ch09	24541973	MantaBND:151:12022:12023:0:4:0:1	SL4.0CH09	24543419	BND	T	T]SL4.0CH09:24543419]	1	0	59
SL4.0ch09	24543419	MantaBND:151:12022:12023:0:4:0:0	SL4.0CH09	24541973	BND	C	C]SL4.0CH09:24541973]	1	0	59
SL4.0ch09	25253414	MantaBND:385573:1:2:0:0:0:0	SL4.0CH07	26483856	BND	T	]SL4.0CH07:26483856]T	1	0	59
SL4.0ch09	25752518	MantaBND:51138:2:5:0:0:0:0	SL4.0CH12	26689712	BND	G	G[SL4.0CH12:26689712[	2	0	58
SL4.0ch09	26131050	MantaBND:87020:4:21:0:0:0:0	SL4.0CH03	22501667	BND	T	T]SL4.0CH03:22501667]	3	0	57
SL4.0ch09	26641886	MantaBND:284618:0:1:0:0:0:0	SL4.0CH05	30850990	BND	G	G]SL4.0CH05:30850990]	1	0	59
SL4.0ch09	26678974	MantaBND:192558:0:1:0:0:0:0	SL4.0CH03	12854763	BND	T	[SL4.0CH03:12854763[T	1	0	59
SL4.0ch09	27455363	MantaBND:111986:0:1:0:0:0:0	SL4.0CH01	85987784	BND	G	[SL4.0CH01:85987784[G	3	0	57
SL4.0ch09	27518438	MantaBND:528702:0:1:1:3:0:1	SL4.0CH09	27518840	BND	A	A]SL4.0CH09:27518840]	1	0	59
SL4.0ch09	27518840	MantaBND:528702:0:1:1:3:0:0	SL4.0CH09	27518438	BND	C	C]SL4.0CH09:27518438]	1	0	59
SL4.0ch09	29481459	MantaBND:101468:0:1:0:0:0:1	SL4.0CH01	74951909	BND	C	[SL4.0CH01:74951909[C	2	0	58
SL4.0ch09	29921401	MantaBND:687457:0:2:0:0:0:1	SL4.0CH09	29924052	BND	T	[SL4.0CH09:29924052[T	6	0	54
SL4.0ch09	29921829	MantaBND:687457:0:1:0:0:0:0	SL4.0CH09	29924051	BND	C	CCAAA]SL4.0CH09:29924051]	6	0	54
SL4.0ch09	29924050	MantaBND:687457:0:2:0:0:0:0	SL4.0CH09	29921403	BND	T	[SL4.0CH09:29921403[T	6	0	54
SL4.0ch09	29924051	MantaBND:687457:0:1:0:0:0:1	SL4.0CH09	29921829	BND	A	ATTTG]SL4.0CH09:29921829]	6	0	54
SL4.0ch09	30037541	MantaBND:39881:0:1:0:0:0:1	SL4.0CH09	30039098	BND	G	G]SL4.0CH09:30039098]	1	1	58
SL4.0ch09	30039098	MantaBND:39881:0:1:0:0:0:0	SL4.0CH09	30037541	BND	G	G]SL4.0CH09:30037541]	1	1	58
SL4.0ch09	30220307	MantaBND:116083:1:3:0:0:0:1	SL4.0CH01	89877485	BND	A	]SL4.0CH01:89877485]AAAAAAAA	2	0	58
SL4.0ch09	30220310	MantaBND:116083:0:1:0:0:0:1	SL4.0CH01	89876824	BND	T	TCGATAGGCTGGTATATTTGTA[SL4.0CH01:89876824[	5	0	55
SL4.0ch09	31071672	MantaBND:151:12166:12168:0:0:0:0	SL4.0CH07	6671560	BND	C	C[SL4.0CH07:6671560[	3	0	57
SL4.0ch09	31405003	MantaBND:281213:1:2:0:0:0:0	SL4.0CH09	31664504	BND	A	AT]SL4.0CH09:31664504]	0	3	57
SL4.0ch09	31664504	MantaBND:281213:1:2:0:0:0:1	SL4.0CH09	31405003	BND	G	GA]SL4.0CH09:31405003]	0	3	57
SL4.0ch09	31793065	MantaBND:690989:0:1:0:0:0:0	SL4.0CH09	31796714	BND	T	[SL4.0CH09:31796714[T	0	2	58
SL4.0ch09	31796714	MantaBND:690989:0:1:0:0:0:1	SL4.0CH09	31793065	BND	T	[SL4.0CH09:31793065[T	0	2	58
SL4.0ch09	32495229	MantaBND:459234:0:1:0:0:0:0	SL4.0CH06	23399953	BND	A	A]SL4.0CH06:23399953]	9	0	51
SL4.0ch09	33642857	MantaBND:1103839:1:2:0:0:0:1	SL4.0CH12	21885070	BND	G	G]SL4.0CH12:21885070]	1	0	59
SL4.0ch09	33678959	MantaBND:353364:0:2:0:0:0:0	SL4.0CH05	17534172	BND	C	[SL4.0CH05:17534172[C	1	0	59
SL4.0ch09	34339993	MantaBND:151:12329:12331:0:0:0:0	SL4.0CH12	55199154	BND	G	G[SL4.0CH12:55199154[	2	0	58
SL4.0ch09	34431699	MantaBND:260962:0:1:0:0:0:1	SL4.0CH04	8012719	BND	T	T]SL4.0CH04:8012719]	2	0	58
SL4.0ch09	34477593	MantaBND:32341:3:8:0:0:0:0	SL4.0CH06	8803528	BND	A	[SL4.0CH06:8803528[A	1	0	59
SL4.0ch09	35104453	MantaBND:101266:17:18:0:0:0:0	SL4.0CH09	38428408	BND	G	[SL4.0CH09:38428408[G	0	1	59
SL4.0ch09	35488029	MantaBND:26:20007:20011:0:0:0:0	SL4.0CH04	16363713	BND	A	A[SL4.0CH04:16363713[	3	0	57
SL4.0ch09	36317847	MantaBND:151:4329:4355:0:0:0:1	SL4.0CH03	54145812	BND	T	T[SL4.0CH03:54145812[	0	1	59
SL4.0ch09	37069073	MantaBND:128:42877:42880:0:7:0:1	SL4.0CH03	18595043	BND	G	G[SL4.0CH03:18595043[	2	0	58
SL4.0ch09	37626585	MantaBND:151:7379:7381:0:0:0:1	SL4.0CH06	13623143	BND	A	]SL4.0CH06:13623143]A	1	0	59
SL4.0ch09	38428408	MantaBND:101266:17:18:0:0:0:1	SL4.0CH09	35104453	BND	A	[SL4.0CH09:35104453[A,[SL4.0CH09:35104487[A	0	1	59
SL4.0ch09	38481301	MantaBND:376140:1:5:1:0:0:1	SL4.0CH09	38484173	BND	C	C]SL4.0CH09:38484173]	1	3	56
SL4.0ch09	38481302	MantaBND:376140:1:5:2:0:0:1	SL4.0CH09	38484174	BND	A	[SL4.0CH09:38484174[A	2	0	58
SL4.0ch09	38481306	MantaBND:328483:1:3:1:0:0:1	SL4.0CH09	38484207	BND	A	[SL4.0CH09:38484207[A	1	1	58
SL4.0ch09	38484172	MantaBND:376140:1:5:1:0:0:0	SL4.0CH09	38481302	BND	A	A]SL4.0CH09:38481302]	1	3	56
SL4.0ch09	38484173	MantaBND:376140:1:5:2:0:0:0	SL4.0CH09	38481303	BND	T	[SL4.0CH09:38481303[T	2	0	58
SL4.0ch09	38484207	MantaBND:328483:1:3:1:0:0:0	SL4.0CH09	38481306	BND	T	[SL4.0CH09:38481306[T	1	1	58
SL4.0ch09	38748053	MantaBND:123:10282:10349:0:0:0:1	SL4.0CH10	32144339	BND	A	[SL4.0CH10:32144339[A	1	0	59
SL4.0ch09	38936722	MantaBND:467859:0:1:0:3:0:1	SL4.0CH08	33736319	BND	T	[SL4.0CH08:33736319[T	1	0	59
SL4.0ch09	38983813	MantaBND:705700:0:1:0:0:0:0	SL4.0CH09	38985877	BND	T	T]SL4.0CH09:38985877]	0	3	57
SL4.0ch09	38985875	MantaBND:705700:0:1:0:0:0:1	SL4.0CH09	38983815	BND	C	C]SL4.0CH09:38983815]	0	3	57
SL4.0ch09	39175451	MantaBND:705588:0:3:0:0:0:1	SL4.0CH09	39234068	BND	G	G]SL4.0CH09:39234068]	0	1	59
SL4.0ch09	39234068	MantaBND:705588:0:3:0:0:0:0	SL4.0CH09	39175451	BND	A	A]SL4.0CH09:39175451]	0	1	59
SL4.0ch09	39237724	MantaBND:705588:1:2:0:0:0:1	SL4.0CH09	39238814	BND	G	[SL4.0CH09:39238814[G	1	0	59
SL4.0ch09	39238814	MantaBND:705588:1:2:0:0:0:0	SL4.0CH09	39237724	BND	C	[SL4.0CH09:39237724[C	1	0	59
SL4.0ch09	39579915	MantaBND:228498:0:1:0:0:0:1	SL4.0CH03	40638949	BND	A	[SL4.0CH03:40638949[A	1	0	59
SL4.0ch09	40150343	MantaBND:118749:0:3:0:0:0:0	SL4.0CH02	1287334	BND	A	[SL4.0CH02:1287334[A	3	0	57
SL4.0ch09	42573403	MantaBND:712523:0:1:0:0:0:1	SL4.0CH09	52688802	BND	T	[SL4.0CH09:52688802[T	4	2	54
SL4.0ch09	42619142	MantaBND:712809:0:1:0:2:0:0	SL4.0CH09	52644481	BND	C	C]SL4.0CH09:52644481]	11	0	49
SL4.0ch09	42850459	MantaBND:5759:5:14:0:0:0:1	SL4.0CH09	43234771	BND	G	[SL4.0CH09:43234771[G	3	0	57
SL4.0ch09	42850463	MantaBND:26:20098:20100:0:0:0:1	SL4.0CH09	43234771	BND	C	[SL4.0CH09:43234771[C	1	0	59
SL4.0ch09	42850513	MantaBND:143:296:298:0:0:0:1	SL4.0CH09	43234771	BND	A	[SL4.0CH09:43234771[A	2	0	58
SL4.0ch09	43234771	MantaBND:5759:5:14:0:0:0:0	SL4.0CH09	42850459	BND	G	[SL4.0CH09:42850459[G,[SL4.0CH09:42850467[G,[SL4.0CH09:42850513[G,[SL4.0CH09:42850463[G,[SL4.0CH09:42850500[G	3	0	54
SL4.0ch09	43456246	MantaBND:10555:27:51:0:0:0:1	SL4.0CH12	55188992	BND	G	G[SL4.0CH12:55188992[	1	0	59
SL4.0ch09	43929635	MantaBND:151:4329:4354:0:0:0:1	SL4.0CH03	54145797	BND	A	A[SL4.0CH03:54145797[	2	0	58
SL4.0ch09	43971134	MantaBND:177515:0:1:0:0:0:0	SL4.0CH02	52156579	BND	T	T[SL4.0CH02:52156579[	3	2	55
SL4.0ch09	43971137	MantaBND:177515:1:2:0:0:0:0	SL4.0CH02	52156734	BND	A	]SL4.0CH02:52156734]A	2	0	58
SL4.0ch09	45147190	MantaBND:250277:3:4:0:0:0:1	SL4.0CH12	31326704	BND	T	T[SL4.0CH12:31326704[	2	0	58
SL4.0ch09	45483849	MantaBND:128:39960:40031:0:2:0:1	SL4.0CH09	49284123	BND	A	A]SL4.0CH09:49284123]	2	0	58
SL4.0ch09	45971435	MantaBND:207016:2:3:0:0:0:0	SL4.0CH11	50643002	BND	T	]SL4.0CH11:50643002]T	2	0	58
SL4.0ch09	46282029	MantaBND:232262:1:4:0:0:0:0	SL4.0CH07	12632937	BND	A	[SL4.0CH07:12632937[A	3	0	57
SL4.0ch09	46423499	MantaBND:330484:2:5:1:0:0:0	SL4.0CH09	46462039	BND	C	C]SL4.0CH09:46462039]	0	4	56
SL4.0ch09	46462034	MantaBND:330484:2:5:1:0:0:1	SL4.0CH09	46423504	BND	C	C]SL4.0CH09:46423504]	0	4	56
SL4.0ch09	46857179	MantaBND:15326:57:58:0:2:0:1	SL4.0CH06	7287584	BND	A	A]SL4.0CH06:7287584]	5	0	55
SL4.0ch09	47225449	MantaBND:115111:0:1:0:0:0:1	SL4.0CH01	89064010	BND	A	[SL4.0CH01:89064010[A,[SL4.0CH01:89064012[A	2	0	56
SL4.0ch09	47279265	MantaBND:85182:1:2:0:0:0:0	SL4.0CH10	53676088	BND	A	[SL4.0CH10:53676088[A	2	0	58
SL4.0ch09	47349171	MantaBND:28023:38:41:0:0:0:0	SL4.0CH01	39078906	BND	A	A]SL4.0CH01:39078906]	1	0	59
SL4.0ch09	47607999	MantaBND:380379:1:1:7:0:0:1	SL4.0CH09	47608351	BND	A	[SL4.0CH09:47608351[A	1	0	59
SL4.0ch09	47608006	MantaBND:128:35788:35788:5:0:0:1	SL4.0CH09	47608351	BND	A	[SL4.0CH09:47608351[A	0	2	58
SL4.0ch09	47608017	MantaBND:380379:1:1:6:0:0:1	SL4.0CH09	47608319	BND	C	CAAAT]SL4.0CH09:47608319]	0	5	55
SL4.0ch09	47608319	MantaBND:380379:1:1:6:0:0:0	SL4.0CH09	47608017	BND	C	CATTT]SL4.0CH09:47608017]	0	5	55
SL4.0ch09	47608351	MantaBND:380379:1:1:7:0:0:0	SL4.0CH09	47607999	BND	G	[SL4.0CH09:47607999[G,[SL4.0CH09:47608006[G	1	0	57
SL4.0ch09	48977951	MantaBND:162:9456:9481:0:0:0:1	SL4.0CH06	4057871	BND	A	[SL4.0CH06:4057871[TGTA	5	0	55
SL4.0ch09	49170927	MantaBND:151:11357:11359:1:0:0:0	SL4.0CH08	53943260	BND	A	[SL4.0CH08:53943260[A	3	0	57
SL4.0ch09	49209265	MantaBND:343576:0:1:1:0:0:1	SL4.0CH09	49209931	BND	C	C]SL4.0CH09:49209931]	0	2	58
SL4.0ch09	49209931	MantaBND:343576:0:1:1:0:0:0	SL4.0CH09	49209265	BND	G	G]SL4.0CH09:49209265]	0	2	58
SL4.0ch09	49284111	MantaBND:128:39960:40031:0:2:0:0	SL4.0CH09	45483861	BND	C	C]SL4.0CH09:45483861]	2	0	58
SL4.0ch09	49495725	MantaBND:553069:0:1:0:0:0:1	SL4.0CH07	56761076	BND	A	A]SL4.0CH07:56761076]	3	0	57
SL4.0ch09	49962150	MantaBND:151:7256:13371:0:0:0:0	SL4.0CH09	49966698	BND	A	A]SL4.0CH09:49966698]	1	0	59
SL4.0ch09	49966698	MantaBND:151:7256:13371:0:0:0:1	SL4.0CH09	49962150	BND	T	T]SL4.0CH09:49962150]	1	0	59
SL4.0ch09	50435566	MantaBND:488469:1:2:0:0:0:0	SL4.0CH09	50604883	BND	C	C]SL4.0CH09:50604883]	0	6	54
SL4.0ch09	50435691	MantaBND:488469:1:2:1:0:0:0	SL4.0CH09	50604881	BND	A	[SL4.0CH09:50604881[TA	1	5	54
SL4.0ch09	50604881	MantaBND:488469:1:2:1:0:0:1	SL4.0CH09	50435691	BND	T	[SL4.0CH09:50435691[AT	1	5	54
SL4.0ch09	50604882	MantaBND:488469:1:2:0:0:0:1	SL4.0CH09	50435567	BND	A	A]SL4.0CH09:50435567]	0	6	54
SL4.0ch09	50635515	MantaBND:409651:0:1:0:0:0:1	SL4.0CH05	59648387	BND	A	]SL4.0CH05:59648387]A	28	2	30
SL4.0ch09	50646517	MantaBND:409340:0:1:0:2:0:0	SL4.0CH05	59650011	BND	T	T[SL4.0CH05:59650011[	31	5	24
SL4.0ch09	50710495	MantaBND:151:8434:13483:0:0:0:0	SL4.0CH10	45433570	BND	G	G[SL4.0CH10:45433570[	2	0	58
SL4.0ch09	50922322	MantaBND:128:50887:50910:0:3:0:0	SL4.0CH02	50665716	BND	G	GATTATCTT]SL4.0CH02:50665716]	3	0	57
SL4.0ch09	51201857	MantaBND:786077:0:1:0:1:0:0	SL4.0CH09	51463431	BND	A	A]SL4.0CH09:51463431]	4	0	56
SL4.0ch09	51461593	MantaBND:77937:13:14:0:0:0:0	SL4.0CH03	31831092	BND	A	]SL4.0CH03:31831092]A	2	0	58
SL4.0ch09	51463418	MantaBND:786077:0:1:0:1:0:1	SL4.0CH09	51201870	BND	G	G]SL4.0CH09:51201870]	5	0	55
SL4.0ch09	51469265	MantaBND:250640:3:4:0:0:0:0	SL4.0CH03	64908566	BND	A	A[SL4.0CH03:64908566[	1	0	59
SL4.0ch09	51472127	MantaBND:401424:1:2:0:1:0:0	SL4.0CH09	51473175	BND	G	GCTAAC]SL4.0CH09:51473175]	6	0	54
SL4.0ch09	51472142	MantaBND:401424:1:2:1:1:0:0	SL4.0CH09	51473186	BND	C	[SL4.0CH09:51473186[C	6	0	54
SL4.0ch09	51473175	MantaBND:401424:1:2:0:1:0:1	SL4.0CH09	51472127	BND	T	TGTTAG]SL4.0CH09:51472127]	6	0	54
SL4.0ch09	51473185	MantaBND:401424:1:2:1:1:0:1	SL4.0CH09	51472143	BND	G	[SL4.0CH09:51472143[G	6	0	54
SL4.0ch09	52644463	MantaBND:712809:0:1:0:2:0:1	SL4.0CH09	42619160	BND	T	T]SL4.0CH09:42619160]	11	0	49
SL4.0ch09	52688800	MantaBND:712523:0:1:0:0:0:0	SL4.0CH09	42573405	BND	G	[SL4.0CH09:42573405[G	4	2	54
SL4.0ch09	53312336	MantaBND:132728:1:3:0:0:0:1	SL4.0CH04	10181104	BND	C	]SL4.0CH04:10181104]C	1	0	59
SL4.0ch09	53723714	MantaBND:681273:0:1:0:0:0:0	SL4.0CH10	4934873	BND	C	C[SL4.0CH10:4934873[	8	0	52
SL4.0ch09	53757896	MantaBND:40131:7:14:0:0:0:0	SL4.0CH10	51460770	BND	T	TT]SL4.0CH10:51460770]	2	0	58
SL4.0ch09	53842849	MantaBND:625166:0:1:0:2:0:0	SL4.0CH08	49451995	BND	A	]SL4.0CH08:49451995]A	2	1	57
SL4.0ch09	53936822	MantaBND:151:14684:14695:0:0:0:0	SL4.0CH04	26254817	BND	G	G[SL4.0CH04:26254817[	2	0	58
SL4.0ch09	54363147	MantaBND:420429:1:2:0:0:0:0	SL4.0CH06	2854016	BND	C	C]SL4.0CH06:2854016]	2	0	58
SL4.0ch09	54363155	MantaBND:454976:1:2:0:0:0:0	SL4.0CH06	2853982	BND	T	T]SL4.0CH06:2853982]	1	0	59
SL4.0ch09	56490999	MantaBND:1152727:0:1:1:0:0:1	SL4.0CH09	61848626	BND	A	[SL4.0CH09:61848626[A	4	0	56
SL4.0ch09	56961841	MantaBND:737032:0:1:0:0:0:0	SL4.0CH09	56966730	BND	A	A]SL4.0CH09:56966730]	2	0	58
SL4.0ch09	56966730	MantaBND:737032:0:1:0:0:0:1	SL4.0CH09	56961841	BND	T	T]SL4.0CH09:56961841]	2	0	58
SL4.0ch09	57112336	MantaBND:125793:1:2:1:0:0:0	SL4.0CH09	57120951	BND	A	A]SL4.0CH09:57120951]	0	3	57
SL4.0ch09	57120946	MantaBND:125793:1:2:1:0:0:1	SL4.0CH09	57112341	BND	G	G]SL4.0CH09:57112341]	0	3	57
SL4.0ch09	57339354	MantaBND:183047:1:2:0:0:0:1	SL4.0CH08	10802988	BND	G	]SL4.0CH08:10802988]G	1	0	59
SL4.0ch09	57339369	MantaBND:23019:9:11:0:0:0:1	SL4.0CH08	10803008	BND	T	]SL4.0CH08:10803008]T	2	0	58
SL4.0ch09	57538383	MantaBND:737948:0:0:2:0:0:0	SL4.0CH09	57539052	BND	T	T]SL4.0CH09:57539052]	1	0	59
SL4.0ch09	57538761	MantaBND:737948:0:0:5:0:0:0	SL4.0CH09	57538855	BND	C	[SL4.0CH09:57538855[C	2	0	58
SL4.0ch09	57538855	MantaBND:737948:0:0:5:0:0:1	SL4.0CH09	57538761	BND	A	[SL4.0CH09:57538761[A	2	0	58
SL4.0ch09	57539052	MantaBND:737948:0:0:2:0:0:1	SL4.0CH09	57538383	BND	A	A]SL4.0CH09:57538383]	1	0	59
SL4.0ch09	57711365	MantaBND:115529:8:9:0:0:0:1	SL4.0CH05	4898713	BND	A	[SL4.0CH05:4898713[A	1	0	59
SL4.0ch09	57757038	MantaBND:178095:0:1:0:0:0:1	SL4.0CH02	52894790	BND	A	]SL4.0CH02:52894790]A	1	0	59
SL4.0ch09	57828895	MantaBND:738794:0:2:0:0:0:0	SL4.0CH12	50866106	BND	T	]SL4.0CH12:50866106]CTCAAGGATGAAGTTTATT	2	0	58
SL4.0ch09	57867330	MantaBND:40602:0:3:0:2:0:0	SL4.0CH01	25918170	BND	T	[SL4.0CH01:25918170[T	2	1	57
SL4.0ch09	57928357	MantaBND:470774:0:1:0:0:0:1	SL4.0CH06	29230055	BND	C	C[SL4.0CH06:29230055[	3	0	57
SL4.0ch09	58033787	MantaBND:13936:9:12:0:0:0:1	SL4.0CH11	49460813	BND	G	]SL4.0CH11:49460813]AG	20	0	40
SL4.0ch09	58034196	MantaBND:143:22442:22444:0:0:0:1	SL4.0CH11	49460806	BND	C	C[SL4.0CH11:49460806[	15	0	45
SL4.0ch09	58101716	MantaBND:15028:3:5:0:0:0:0	SL4.0CH10	5911631	BND	T	T]SL4.0CH10:5911631]	2	0	58
SL4.0ch09	58613993	MantaBND:151:14041:14042:0:0:0:1	SL4.0CH09	58615115	BND	A	[SL4.0CH09:58615115[A	0	2	58
SL4.0ch09	58615115	MantaBND:151:14041:14042:0:0:0:0	SL4.0CH09	58613993	BND	G	[SL4.0CH09:58613993[G,[SL4.0CH09:58613996[G	0	2	57
SL4.0ch09	58724580	MantaBND:740131:0:1:0:0:0:0	SL4.0CH10	49984060	BND	C	C]SL4.0CH10:49984060]	1	0	59
SL4.0ch09	58724589	MantaBND:740131:0:1:1:0:0:1	SL4.0CH10	49983668	BND	A	[SL4.0CH10:49983668[A	1	0	59
SL4.0ch09	58816134	MantaBND:740288:0:4:0:0:0:0	SL4.0CH09	58858959	BND	G	[SL4.0CH09:58858959[G	0	1	59
SL4.0ch09	58858959	MantaBND:740288:0:4:0:0:0:1	SL4.0CH09	58816134	BND	T	[SL4.0CH09:58816134[T	0	1	59
SL4.0ch09	59388426	MantaBND:26:26194:26222:0:0:0:1	SL4.0CH11	8730533	BND	G	[SL4.0CH11:8730533[G	12	0	48
SL4.0ch09	59396266	MantaBND:112068:0:1:0:0:0:1	SL4.0CH09	59396948	BND	T	[SL4.0CH09:59396948[T,[SL4.0CH09:59396959[T	0	1	59
SL4.0ch09	59396948	MantaBND:112068:0:1:0:0:0:0	SL4.0CH09	59396266	BND	T	[SL4.0CH09:59396266[T	0	1	59
SL4.0ch09	59471330	MantaBND:206395:0:4:0:0:0:0	SL4.0CH03	23473930	BND	T	]SL4.0CH03:23473930]T	1	0	59
SL4.0ch09	59671858	MantaBND:187872:0:1:0:0:0:0	SL4.0CH03	58012167	BND	G	[SL4.0CH03:58012167[G	1	0	59
SL4.0ch09	59671869	MantaBND:246282:0:1:0:0:0:1	SL4.0CH03	58012140	BND	A	[SL4.0CH03:58012140[A	1	0	59
SL4.0ch09	59671890	MantaBND:249035:0:1:0:0:0:0	SL4.0CH03	58012154	BND	T	[SL4.0CH03:58012154[T	1	0	59
SL4.0ch09	59900059	MantaBND:338149:0:1:0:0:0:0	SL4.0CH05	4324535	BND	T	]SL4.0CH05:4324535]T	1	0	59
SL4.0ch09	60103543	MantaBND:121002:2:4:1:0:0:1	SL4.0CH02	27489001	BND	A	]SL4.0CH02:27489001]A	1	0	59
SL4.0ch09	60104145	MantaBND:121002:2:4:0:0:0:0	SL4.0CH02	27489243	BND	T	T[SL4.0CH02:27489243[	4	0	56
SL4.0ch09	61320365	MantaBND:26:14189:14190:0:2:0:0	SL4.0CH07	60491688	BND	C	C]SL4.0CH07:60491688]	4	0	56
SL4.0ch09	61590568	MantaBND:143:18061:18075:0:4:0:1	SL4.0CH05	33002801	BND	A	A[SL4.0CH05:33002801[	3	0	57
SL4.0ch09	61848626	MantaBND:1152727:0:1:1:0:0:0	SL4.0CH09	56490999	BND	C	[SL4.0CH09:56490999[C	4	0	56
SL4.0ch09	62041301	MantaBND:732846:0:0:7:0:0:0	SL4.0CH09	62041440	BND	A	[SL4.0CH09:62041440[TCTTTATTAGTTTTGTTTTGTTTATTTTCATTTACTTTTGATCTTTATGTTATGATTTTGA	2	0	58
SL4.0ch09	62041440	MantaBND:732846:0:0:7:0:0:1	SL4.0CH09	62041301	BND	A	[SL4.0CH09:62041301[CAAAATCATAACATAAAGATCAAAAGTAAATGAAAATAAACAAAACAAAACTAATAAAGAA	2	0	58
SL4.0ch09	62815700	MantaBND:733551:0:1:0:0:0:1	SL4.0CH12	4601770	BND	A	[SL4.0CH12:4601770[A	1	1	58
SL4.0ch09	62852615	MantaBND:95464:1:2:0:0:0:0	SL4.0CH10	4297405	BND	A	]SL4.0CH10:4297405]A	4	0	56
SL4.0ch09	62852617	MantaBND:95464:1:3:0:0:0:0	SL4.0CH10	4292615	BND	T	T[SL4.0CH10:4292615[	4	0	56
SL4.0ch09	63891728	MantaBND:515291:0:1:0:0:0:1	SL4.0CH07	50106603	BND	A	A[SL4.0CH07:50106603[	1	0	59
SL4.0ch09	64285519	MantaBND:210614:0:20:0:0:0:1	SL4.0CH03	26643831	BND	C	]SL4.0CH03:26643831]C	1	0	59
SL4.0ch09	65328920	MantaBND:151:13888:13889:1:1:0:1	SL4.0CH09	65329740	BND	T	[SL4.0CH09:65329740[T	3	2	55
SL4.0ch09	65329740	MantaBND:151:13888:13889:1:1:0:0	SL4.0CH09	65328920	BND	C	[SL4.0CH09:65328920[C	3	2	55
SL4.0ch09	65438633	MantaBND:26:14144:14149:1:0:0:0	SL4.0CH03	58684297	BND	A	]SL4.0CH03:58684297]A	1	0	59
SL4.0ch09	65438663	MantaBND:123:8119:8122:0:1:0:0	SL4.0CH03	58684084	BND	C	C[SL4.0CH03:58684084[	2	0	58
SL4.0ch09	65470146	MantaBND:47827:0:1:0:0:0:1	SL4.0CH01	41086760	BND	G	]SL4.0CH01:41086760]G	1	0	59
SL4.0ch09	65519212	MantaBND:531866:1:2:0:0:0:0	SL4.0CH09	65519658	BND	A	A]SL4.0CH09:65519658]	1	0	59
SL4.0ch09	65519236	MantaBND:175856:1:1:1:0:0:0	SL4.0CH09	65519610	BND	T	T]SL4.0CH09:65519610]	1	0	59
SL4.0ch09	65519610	MantaBND:175856:1:1:1:0:0:1	SL4.0CH09	65519236	BND	T	T]SL4.0CH09:65519236]	1	0	59
SL4.0ch09	65519658	MantaBND:531866:1:2:0:0:0:1	SL4.0CH09	65519212	BND	A	A]SL4.0CH09:65519212]	1	0	59
SL4.0ch09	66198572	MantaBND:357105:0:1:0:0:0:1	SL4.0CH06	3053402	BND	C	C]SL4.0CH06:3053402]	7	0	53
SL4.0ch09	67090185	MantaBND:374721:3:4:0:0:0:1	SL4.0CH06	16262481	BND	A	]SL4.0CH06:16262481]TGTGACGTCCCGCCACATTTCCAGTCGTTGTGCAGCATACGGA	5	0	55
SL4.0ch09	67130871	MantaBND:388533:0:1:0:0:0:1	SL4.0CH05	56109007	BND	T	[SL4.0CH05:56109007[GTCCCGTTTGTGGAAAGGCAAGATTTTCTTATTTCTTTTAT	1	0	59
SL4.0ch09	67650734	MantaBND:478214:0:1:0:1:0:1	SL4.0CH06	33987988	BND	A	A[SL4.0CH06:33987988[	7	0	53
SL4.0ch09	67650736	MantaBND:478214:0:1:1:0:0:0	SL4.0CH06	33988371	BND	T	]SL4.0CH06:33988371]T	1	0	59
SL4.0ch09	67900265	MantaBND:455284:0:1:0:0:0:0	SL4.0CH06	2985205	BND	A	]SL4.0CH06:2985205]A	2	0	58
SL4.0ch09	67900581	MantaBND:455284:0:2:0:0:0:0	SL4.0CH06	2985345	BND	T	T[SL4.0CH06:2985345[	1	0	59
SL4.0ch09	68046546	MantaBND:32:14835:14838:0:0:0:0	SL4.0CH06	29966089	BND	A	A]SL4.0CH06:29966089]	1	0	59
SL4.0ch09	68229562	MantaBND:320426:1:2:0:0:0:1	SL4.0CH04	49988300	BND	T	T]SL4.0CH04:49988300]	1	0	59
SL4.0ch09	68229565	MantaBND:306922:1:2:0:0:0:1	SL4.0CH04	49988300	BND	G	G]SL4.0CH04:49988300]	1	0	59
SL4.0ch09	68338499	MantaBND:32:17135:17141:0:0:0:1	SL4.0CH07	3411258	BND	A	[SL4.0CH07:3411258[A	1	0	59
SL4.0ch10	46818	MantaBND:740638:0:1:2:1:0:0	SL4.0CH10	8865743	BND	C	[SL4.0CH10:8865743[C	1	0	59
SL4.0ch10	92835	MantaBND:33173:0:1:0:0:0:1	SL4.0CH01	19161714	BND	A	A[SL4.0CH01:19161714[	1	0	59
SL4.0ch10	154822	MantaBND:173173:0:1:1:0:0:1	SL4.0CH02	44918039	BND	A	]SL4.0CH02:44918039]A	1	0	59
SL4.0ch10	154988	MantaBND:170715:0:1:0:0:0:0	SL4.0CH02	44917733	BND	C	C[SL4.0CH02:44917733[	1	0	59
SL4.0ch10	155011	MantaBND:173173:0:1:0:0:0:0	SL4.0CH02	44917733	BND	A	A[SL4.0CH02:44917733[	1	0	59
SL4.0ch10	155018	MantaBND:131366:0:1:0:0:0:0	SL4.0CH02	44917733	BND	G	G[SL4.0CH02:44917733[	1	0	59
SL4.0ch10	289788	MantaBND:741422:0:1:0:0:0:0	SL4.0CH10	54284315	BND	C	C]SL4.0CH10:54284315]	1	0	59
SL4.0ch10	300445	MantaBND:179685:1:2:0:0:0:0	SL4.0CH11	29117601	BND	A	A]SL4.0CH11:29117601]	1	0	59
SL4.0ch10	441720	MantaBND:270351:0:1:1:0:0:0	SL4.0CH04	12301290	BND	A	[SL4.0CH04:12301290[A	1	0	59
SL4.0ch10	441825	MantaBND:270351:0:1:0:0:0:0	SL4.0CH04	12301507	BND	A	A]SL4.0CH04:12301507]	1	0	59
SL4.0ch10	589089	MantaBND:682865:1:2:0:0:0:0	SL4.0CH10	10962783	BND	A	[SL4.0CH10:10962783[A	1	0	59
SL4.0ch10	1782903	MantaBND:104835:3:4:0:1:0:0	SL4.0CH03	58042127	BND	A	[SL4.0CH03:58042127[A	1	0	59
SL4.0ch10	1925040	MantaBND:487717:0:1:0:0:0:1	SL4.0CH08	1392896	BND	G	[SL4.0CH08:1392896[G	1	0	59
SL4.0ch10	2048018	MantaBND:329854:0:2:0:0:0:0	SL4.0CH04	59225997	BND	T	[SL4.0CH04:59225997[T,[SL4.0CH04:59225950[T,[SL4.0CH04:59226014[T,[SL4.0CH04:59225956[T	6	0	40
SL4.0ch10	2048082	MantaBND:331861:0:2:0:3:0:0	SL4.0CH04	59225936	BND	G	[SL4.0CH04:59225936[TTG	6	0	54
SL4.0ch10	2048272	MantaBND:329854:0:1:0:0:0:0	SL4.0CH04	59225954	BND	A	A]SL4.0CH04:59225954]	42	1	17
SL4.0ch10	2048328	MantaBND:316576:0:1:0:0:0:0	SL4.0CH04	59225930	BND	T	T]SL4.0CH04:59225930]	1	0	59
SL4.0ch10	2295612	MantaBND:26:29038:29047:0:0:0:0	SL4.0CH04	56941715	BND	A	]SL4.0CH04:56941715]A	1	0	59
SL4.0ch10	2295619	MantaBND:15356:1:4:0:0:0:0	SL4.0CH04	56941706	BND	G	]SL4.0CH04:56941706]G	6	0	54
SL4.0ch10	2295622	MantaBND:101816:12:17:0:0:0:0	SL4.0CH04	56941703	BND	C	]SL4.0CH04:56941703]C	3	0	57
SL4.0ch10	2295634	MantaBND:65445:11:15:0:0:0:0	SL4.0CH04	56941691	BND	T	]SL4.0CH04:56941691]T	7	0	53
SL4.0ch10	2295650	MantaBND:81390:1:6:0:0:0:0	SL4.0CH04	56941675	BND	T	]SL4.0CH04:56941675]T	2	0	58
SL4.0ch10	2295652	MantaBND:74545:2:3:0:0:0:0	SL4.0CH04	56941675	BND	G	]SL4.0CH04:56941675]G	7	1	52
SL4.0ch10	2295989	MantaBND:81390:6:7:0:0:0:0	SL4.0CH04	40951173	BND	T	T]SL4.0CH04:40951173]	1	0	59
SL4.0ch10	2295989	MantaBND:74545:3:4:0:0:0:0	SL4.0CH04	40951180	BND	T	T]SL4.0CH04:40951180]	1	0	59
SL4.0ch10	2295990	MantaBND:65445:10:11:0:0:0:1	SL4.0CH04	40951184	BND	T	T]SL4.0CH04:40951184]	1	0	59
SL4.0ch10	2295992	MantaBND:15356:3:4:0:0:0:1	SL4.0CH04	40951152	BND	T	T]SL4.0CH04:40951152]	3	0	57
SL4.0ch10	2295994	MantaBND:26:29047:29049:0:0:0:0	SL4.0CH04	40951186	BND	T	T]SL4.0CH04:40951186]	1	0	59
SL4.0ch10	2485812	MantaBND:246645:0:1:0:0:0:0	SL4.0CH03	55484133	BND	A	A]SL4.0CH03:55484133]	1	0	59
SL4.0ch10	2960666	MantaBND:151:10685:10686:0:0:0:1	SL4.0CH06	31243230	BND	T	T[SL4.0CH06:31243230[	1	0	59
SL4.0ch10	3829499	MantaBND:379447:2:3:0:1:0:1	SL4.0CH09	2442490	BND	C	C[SL4.0CH09:2442490[	1	0	59
SL4.0ch10	4292615	MantaBND:95464:1:3:0:0:0:1	SL4.0CH09	62852617	BND	T	]SL4.0CH09:62852617]T	4	0	56
SL4.0ch10	4297405	MantaBND:95464:1:2:0:0:0:1	SL4.0CH09	62852615	BND	A	A[SL4.0CH09:62852615[	4	0	56
SL4.0ch10	4457603	MantaBND:123:8635:8637:0:0:0:1	SL4.0CH06	27566011	BND	T	T[SL4.0CH06:27566011[	1	0	59
SL4.0ch10	4885880	MantaBND:434380:0:1:0:0:0:1	SL4.0CH07	62205655	BND	T	]SL4.0CH07:62205655]T	1	0	59
SL4.0ch10	4934873	MantaBND:681273:0:1:0:0:0:1	SL4.0CH09	53723714	BND	A	]SL4.0CH09:53723714]A	8	0	52
SL4.0ch10	5132236	MantaBND:26:31339:31341:0:0:0:1	SL4.0CH03	61224515	BND	G	[SL4.0CH03:61224515[G	4	0	56
SL4.0ch10	5585172	MantaBND:340971:1:5:1:0:0:1	SL4.0CH07	62894707	BND	C	]SL4.0CH07:62894707]C	2	0	58
SL4.0ch10	5597996	MantaBND:127056:2:4:0:0:0:1	SL4.0CH03	40296757	BND	T	]SL4.0CH03:40296757]T	1	0	59
SL4.0ch10	5612082	MantaBND:123:4747:4748:0:0:0:1	SL4.0CH01	88240325	BND	A	[SL4.0CH01:88240325[A	1	0	59
SL4.0ch10	5911631	MantaBND:15028:3:5:0:0:0:1	SL4.0CH09	58101716	BND	T	T]SL4.0CH09:58101716]	2	0	58
SL4.0ch10	8183000	MantaBND:377578:1:3:0:0:0:1	SL4.0CH11	1763408	BND	T	]SL4.0CH11:1763408]T	1	0	59
SL4.0ch10	8277898	MantaBND:430512:0:1:0:0:0:1	SL4.0CH07	60460668	BND	A	A[SL4.0CH07:60460668[	1	0	59
SL4.0ch10	8277905	MantaBND:26:23508:23511:0:0:0:0	SL4.0CH07	60460655	BND	A	A[SL4.0CH07:60460655[	1	0	59
SL4.0ch10	8865730	MantaBND:740638:0:1:2:1:0:1	SL4.0CH10	46831	BND	C	[SL4.0CH10:46831[C	1	0	59
SL4.0ch10	8907163	MantaBND:276565:0:1:0:0:0:0	SL4.0CH04	18736283	BND	T	]SL4.0CH04:18736283]T	1	0	59
SL4.0ch10	8907178	MantaBND:298926:0:1:0:0:0:0	SL4.0CH04	18736251	BND	A	]SL4.0CH04:18736251]A	2	0	58
SL4.0ch10	8907199	MantaBND:266239:0:1:0:0:0:0	SL4.0CH04	18736252	BND	G	]SL4.0CH04:18736252]G	1	0	59
SL4.0ch10	8907205	MantaBND:279564:0:1:0:0:0:0	SL4.0CH04	18736252	BND	T	]SL4.0CH04:18736252]T	3	0	57
SL4.0ch10	8907210	MantaBND:211204:0:1:0:0:0:0	SL4.0CH04	18736252	BND	A	]SL4.0CH04:18736252]A	2	0	58
SL4.0ch10	10920277	MantaBND:471469:0:2:0:0:0:1	SL4.0CH06	29834879	BND	C	]SL4.0CH06:29834879]C	1	0	59
SL4.0ch10	10962783	MantaBND:682865:1:2:0:0:0:1	SL4.0CH10	589089	BND	T	[SL4.0CH10:589089[T	1	0	59
SL4.0ch10	11379039	MantaBND:402647:0:1:0:2:0:0	SL4.0CH05	53929648	BND	A	[SL4.0CH05:53929648[A	1	0	59
SL4.0ch10	11709025	MantaBND:204490:0:1:0:0:0:1	SL4.0CH03	10310796	BND	T	[SL4.0CH03:10310796[T	1	0	59
SL4.0ch10	11709034	MantaBND:146549:0:1:0:0:0:1	SL4.0CH03	10310805	BND	T	[SL4.0CH03:10310805[T	1	0	59
SL4.0ch10	11837958	MantaBND:20553:10:11:0:0:0:0	SL4.0CH01	10808788	BND	C	C]SL4.0CH01:10808788]	4	0	56
SL4.0ch10	11837963	MantaBND:162:18044:18049:1:0:0:1	SL4.0CH01	10808777	BND	G	G]SL4.0CH01:10808777]	1	0	59
SL4.0ch10	11837992	MantaBND:18464:14:15:0:0:0:0	SL4.0CH01	10808777	BND	A	A]SL4.0CH01:10808777]	1	0	59
SL4.0ch10	14533896	MantaBND:162:9481:9490:0:0:0:1	SL4.0CH06	4057871	BND	A	A[SL4.0CH06:4057871[	5	0	55
SL4.0ch10	15560351	MantaBND:76635:0:2:0:0:0:1	SL4.0CH01	73576847	BND	A	A[SL4.0CH01:73576847[	1	0	59
SL4.0ch10	16043159	MantaBND:715016:0:1:0:0:0:1	SL4.0CH10	16062067	BND	A	ACATTCAATA]SL4.0CH10:16062067]	0	1	59
SL4.0ch10	16062067	MantaBND:715016:0:1:0:0:0:0	SL4.0CH10	16043159	BND	G	GTATTGAATG]SL4.0CH10:16043159]	0	1	59
SL4.0ch10	16729427	MantaBND:332186:0:1:0:0:0:1	SL4.0CH04	59354517	BND	A	]SL4.0CH04:59354517]A	1	0	59
SL4.0ch10	17002071	MantaBND:664219:0:1:0:0:0:0	SL4.0CH12	26831768	BND	T	[SL4.0CH12:26831768[T	1	0	59
SL4.0ch10	17134425	MantaBND:39707:2:7:0:0:0:0	SL4.0CH04	51768892	BND	A	[SL4.0CH04:51768892[A	1	0	59
SL4.0ch10	19473207	MantaBND:20156:7:10:0:0:0:0	SL4.0CH11	10787505	BND	A	A]SL4.0CH11:10787505]	13	0	47
SL4.0ch10	19473213	MantaBND:143:24744:24746:0:5:0:0	SL4.0CH11	10787498	BND	A	AG]SL4.0CH11:10787498]	4	0	56
SL4.0ch10	22521692	MantaBND:489115:0:1:0:0:0:0	SL4.0CH08	2998552	BND	C	]SL4.0CH08:2998552]C	1	0	59
SL4.0ch10	23674135	MantaBND:478710:0:1:0:0:0:0	SL4.0CH06	36764856	BND	G	]SL4.0CH06:36764856]G	1	0	59
SL4.0ch10	24192968	MantaBND:273542:0:3:0:0:0:1	SL4.0CH04	17175822	BND	T	[SL4.0CH04:17175822[T	13	0	47
SL4.0ch10	25295278	MantaBND:6968:0:2:0:0:0:1	SL4.0CH00	7479304	BND	T	T]SL4.0CH00:7479304]	56	0	4
SL4.0ch10	25847231	MantaBND:951237:0:1:0:0:0:1	SL4.0CH08	19178839	BND	A	AT]SL4.0CH08:19178839]	1	0	59
SL4.0ch10	27340250	MantaBND:645323:0:1:0:0:0:0	SL4.0CH09	8863181	BND	C	C]SL4.0CH09:8863181]	1	0	59
SL4.0ch10	31583279	MantaBND:419993:0:1:0:0:0:1	SL4.0CH06	2646936	BND	T	]SL4.0CH06:2646936]T	12	0	48
SL4.0ch10	32144339	MantaBND:123:10282:10349:0:0:0:0	SL4.0CH09	38748053	BND	T	[SL4.0CH09:38748053[T	1	0	59
SL4.0ch10	32719109	MantaBND:241902:0:1:0:1:0:1	SL4.0CH03	52845402	BND	A	AC[SL4.0CH03:52845402[	1	0	59
SL4.0ch10	33347792	MantaBND:256774:0:2:0:0:0:1	SL4.0CH04	4646235	BND	G	GCA[SL4.0CH04:4646235[	4	0	56
SL4.0ch10	33586284	MantaBND:73689:1:11:0:0:0:1	SL4.0CH12	35271110	BND	T	T[SL4.0CH12:35271110[	1	0	59
SL4.0ch10	34728518	MantaBND:105332:0:1:0:0:0:0	SL4.0CH02	14682654	BND	A	]SL4.0CH02:14682654]A	1	0	59
SL4.0ch10	35750670	MantaBND:233973:1:3:0:0:0:1	SL4.0CH05	16339460	BND	T	[SL4.0CH05:16339460[TCTTCCT	3	0	57
SL4.0ch10	36103575	MantaBND:781820:0:1:0:0:0:1	SL4.0CH10	36884378	BND	A	A]SL4.0CH10:36884378]	0	1	59
SL4.0ch10	36884377	MantaBND:781820:0:1:0:0:0:0	SL4.0CH10	36103576	BND	C	C]SL4.0CH10:36103576]	0	1	59
SL4.0ch10	37711907	MantaBND:738160:0:1:0:2:0:1	SL4.0CH10	37713251	BND	C	C]SL4.0CH10:37713251]	1	0	59
SL4.0ch10	37713247	MantaBND:738160:0:1:0:2:0:0	SL4.0CH10	37711911	BND	G	G]SL4.0CH10:37711911]	1	0	59
SL4.0ch10	39950985	MantaBND:442304:0:1:0:0:0:1	SL4.0CH06	13706246	BND	C	C[SL4.0CH06:13706246[	1	0	59
SL4.0ch10	40507831	MantaBND:26:278:279:0:0:0:1	SL4.0CH04	54438230	BND	A	[SL4.0CH04:54438230[A	1	0	59
SL4.0ch10	45097118	MantaBND:162:12553:12556:0:0:0:1	SL4.0CH06	17659710	BND	C	CC]SL4.0CH06:17659710]	5	0	55
SL4.0ch10	45433570	MantaBND:151:8434:13483:0:0:0:1	SL4.0CH09	50710495	BND	C	]SL4.0CH09:50710495]C	2	0	58
SL4.0ch10	45433572	MantaBND:151:8434:13486:0:0:0:1	SL4.0CH07	62863837	BND	A	[SL4.0CH07:62863837[A	1	0	59
SL4.0ch10	46294317	MantaBND:26:17434:17436:0:0:0:0	SL4.0CH01	21830391	BND	A	A[SL4.0CH01:21830391[	2	0	58
SL4.0ch10	46294385	MantaBND:143:19703:19704:0:0:0:0	SL4.0CH01	21830390	BND	T	T[SL4.0CH01:21830390[	1	0	59
SL4.0ch10	46294441	MantaBND:28955:0:1:1:0:0:1	SL4.0CH01	21830393	BND	C	C[SL4.0CH01:21830393[	1	0	59
SL4.0ch10	47584599	MantaBND:693278:0:1:0:0:0:1	SL4.0CH10	47995022	BND	A	A]SL4.0CH10:47995022]	3	16	41
SL4.0ch10	47584607	MantaBND:794280:0:1:0:0:0:0	SL4.0CH10	47995020	BND	A	[SL4.0CH10:47995020[A	12	4	44
SL4.0ch10	47995013	MantaBND:693278:0:1:0:0:0:0	SL4.0CH10	47584608	BND	A	A]SL4.0CH10:47584608]	3	16	41
SL4.0ch10	47995019	MantaBND:794280:0:1:0:0:0:1	SL4.0CH10	47584608	BND	T	[SL4.0CH10:47584608[T	12	4	44
SL4.0ch10	48868182	MantaBND:123:7010:7012:0:0:0:0	SL4.0CH06	29520297	BND	G	G[SL4.0CH06:29520297[	1	0	59
SL4.0ch10	48868909	MantaBND:123:8532:8533:0:0:0:1	SL4.0CH03	6297995	BND	G	[SL4.0CH03:6297995[G	1	0	59
SL4.0ch10	49454974	MantaBND:151:7083:7314:0:0:0:0	SL4.0CH06	22451180	BND	G	G]SL4.0CH06:22451180]	1	0	59
SL4.0ch10	49983668	MantaBND:740131:0:1:1:0:0:0	SL4.0CH09	58724589	BND	G	[SL4.0CH09:58724589[G	1	0	59
SL4.0ch10	49984060	MantaBND:740131:0:1:0:0:0:1	SL4.0CH09	58724580	BND	T	T]SL4.0CH09:58724580]	1	0	59
SL4.0ch10	50263795	MantaBND:86792:0:2:0:0:0:1	SL4.0CH01	60685856	BND	A	A[SL4.0CH01:60685856[	2	0	58
SL4.0ch10	50263796	MantaBND:72031:0:1:0:0:0:1	SL4.0CH01	60685856	BND	A	A[SL4.0CH01:60685856[	1	0	59
SL4.0ch10	50263797	MantaBND:82544:0:2:0:0:0:1	SL4.0CH01	60685856	BND	C	C[SL4.0CH01:60685856[	1	0	59
SL4.0ch10	50298942	MantaBND:457136:0:1:0:0:0:1	SL4.0CH07	39846658	BND	A	AT]SL4.0CH07:39846658]	1	0	59
SL4.0ch10	50435356	MantaBND:553733:0:1:0:5:0:0	SL4.0CH08	15375954	BND	A	]SL4.0CH08:15375954]A	1	0	59
SL4.0ch10	51460770	MantaBND:40131:7:14:0:0:0:1	SL4.0CH09	53757896	BND	C	CA]SL4.0CH09:53757896]	2	0	58
SL4.0ch10	52567821	MantaBND:162:17506:17508:0:1:0:1	SL4.0CH01	23906093	BND	A	]SL4.0CH01:23906093]A	3	0	57
SL4.0ch10	53565830	MantaBND:556175:1:2:0:0:0:0	SL4.0CH08	47234801	BND	C	C[SL4.0CH08:47234801[	1	0	59
SL4.0ch10	53676088	MantaBND:85182:1:2:0:0:0:1	SL4.0CH09	47279265	BND	G	[SL4.0CH09:47279265[G	2	0	58
SL4.0ch10	54284315	MantaBND:741422:0:1:0:0:0:1	SL4.0CH10	289788	BND	G	G]SL4.0CH10:289788]	1	0	59
SL4.0ch10	54593414	MantaBND:151:16116:16118:0:0:0:1	SL4.0CH11	9966776	BND	T	]SL4.0CH11:9966776]T	34	0	26
SL4.0ch10	56129322	MantaBND:186943:1:2:0:0:0:0	SL4.0CH03	54391612	BND	A	A[SL4.0CH03:54391612[	1	0	59
SL4.0ch10	56226214	MantaBND:15010:1:4:0:0:0:1	SL4.0CH03	46667945	BND	C	CT]SL4.0CH03:46667945]	2	0	58
SL4.0ch10	58324804	MantaBND:59347:7:8:0:0:0:1	SL4.0CH07	63690093	BND	T	]SL4.0CH07:63690093]T	1	0	59
SL4.0ch10	58585103	MantaBND:123:4733:4763:0:0:0:0	SL4.0CH05	60487174	BND	A	[SL4.0CH05:60487174[TGTTGAATGCCTTGAATCGGACCCGCTA	9	0	51
SL4.0ch10	60785295	MantaBND:18839:1:6:0:0:0:1	SL4.0CH04	17485764	BND	A	[SL4.0CH04:17485764[A	3	1	56
SL4.0ch10	61283047	MantaBND:391911:0:1:0:0:0:0	SL4.0CH05	45443430	BND	A	[SL4.0CH05:45443430[TTCA	1	0	59
SL4.0ch10	61540886	MantaBND:162:17792:24315:1:0:0:0	SL4.0CH11	53119024	BND	C	]SL4.0CH11:53119024]C	2	0	58
SL4.0ch10	61540891	MantaBND:143:5698:19897:1:0:0:0	SL4.0CH11	53119107	BND	T	]SL4.0CH11:53119107]T,]SL4.0CH11:53119106]T	3	0	56
SL4.0ch10	61540894	MantaBND:32:10671:16445:1:0:0:0	SL4.0CH11	53119061	BND	A	]SL4.0CH11:53119061]A	1	0	59
SL4.0ch10	61540896	MantaBND:151:15469:15471:1:0:0:0	SL4.0CH11	53119125	BND	T	]SL4.0CH11:53119125]T,]SL4.0CH11:53119119]T	3	0	57
SL4.0ch10	61541215	MantaBND:151:15469:15471:0:0:0:0	SL4.0CH11	53119019	BND	G	G[SL4.0CH11:53119019[	10	0	50
SL4.0ch10	61541215	MantaBND:32:10671:16445:0:0:0:0	SL4.0CH11	53119052	BND	G	G[SL4.0CH11:53119052[	5	0	55
SL4.0ch10	61541215	MantaBND:162:17792:24315:0:0:0:0	SL4.0CH11	53119053	BND	G	G[SL4.0CH11:53119053[	4	0	56
SL4.0ch10	61541215	MantaBND:26:16106:25264:0:0:0:0	SL4.0CH11	53119036	BND	G	G[SL4.0CH11:53119036[	3	0	57
SL4.0ch10	62080688	MantaBND:154781:0:1:0:0:0:0	SL4.0CH02	34979662	BND	T	TT[SL4.0CH02:34979662[	12	0	48
SL4.0ch10	62303384	MantaBND:632061:0:1:0:0:0:1	SL4.0CH09	1091211	BND	G	G]SL4.0CH09:1091211]	1	0	59
SL4.0ch10	64390643	MantaBND:162:12868:12872:0:0:0:1	SL4.0CH06	21165537	BND	A	AC]SL4.0CH06:21165537]	5	0	55
SL4.0ch10	64532903	MantaBND:240782:1:2:0:0:0:0	SL4.0CH08	60945607	BND	T	[SL4.0CH08:60945607[T	1	0	59
SL4.0ch10	64574179	MantaBND:296179:4:7:0:0:0:1	SL4.0CH11	46077177	BND	C	C[SL4.0CH11:46077177[	8	0	52
SL4.0ch11	1688197	MantaBND:151:18967:18969:0:0:0:1	SL4.0CH01	17929396	BND	C	CACTATAGATTTGTCATTCCCTGGGCTTGGCCAAAGACATACCCGGCATACTAAGACTAAGATGAATCATCTCAGTTCCTCAACAGGCCTAGT[SL4.0CH01:17929396[	9	0	51
SL4.0ch11	1688197	MantaBND:143:24764:24770:0:0:0:1	SL4.0CH08	36873047	BND	C	CACTATAGAT[SL4.0CH08:36873047[	3	0	57
SL4.0ch11	1763408	MantaBND:377578:1:3:0:0:0:0	SL4.0CH10	8183000	BND	T	T[SL4.0CH10:8183000[	1	0	59
SL4.0ch11	3617634	MantaBND:823711:0:0:7:3:0:0	SL4.0CH11	3617795	BND	T	TTTC]SL4.0CH11:3617795]	4	7	49
SL4.0ch11	3617795	MantaBND:823711:0:0:7:3:0:1	SL4.0CH11	3617634	BND	A	AGAA]SL4.0CH11:3617634]	4	7	49
SL4.0ch11	4440261	MantaBND:708310:0:1:0:1:0:1	SL4.0CH11	4440597	BND	A	A]SL4.0CH11:4440597]	1	0	59
SL4.0ch11	4440595	MantaBND:708310:0:1:0:1:0:0	SL4.0CH11	4440263	BND	A	A]SL4.0CH11:4440263]	1	0	59
SL4.0ch11	4576711	MantaBND:167348:6:7:1:0:0:0	SL4.0CH02	42072804	BND	G	]SL4.0CH02:42072804]G	8	0	52
SL4.0ch11	4576719	MantaBND:167348:6:7:0:0:0:0	SL4.0CH02	42072423	BND	G	G[SL4.0CH02:42072423[	7	0	53
SL4.0ch11	4700856	MantaBND:274971:0:1:1:1:0:0	SL4.0CH04	2592032	BND	G	[SL4.0CH04:2592032[G	4	1	55
SL4.0ch11	4704588	MantaBND:274758:0:1:1:0:0:1	SL4.0CH04	2588327	BND	T	TT]SL4.0CH04:2588327]	1	0	59
SL4.0ch11	4749786	MantaBND:824691:6:8:0:0:0:1	SL4.0CH11	4763546	BND	A	A]SL4.0CH11:4763546]	15	0	45
SL4.0ch11	4763526	MantaBND:824691:6:8:0:0:0:0	SL4.0CH11	4749806	BND	C	C]SL4.0CH11:4749806]	15	0	45
SL4.0ch11	4764260	MantaBND:224244:2:8:0:0:0:1	SL4.0CH11	4765859	BND	G	[SL4.0CH11:4765859[G	1	0	59
SL4.0ch11	4765859	MantaBND:224244:2:8:0:0:0:0	SL4.0CH11	4764260	BND	A	[SL4.0CH11:4764260[A	1	0	59
SL4.0ch11	4978614	MantaBND:528425:1:2:0:0:0:1	SL4.0CH07	58278470	BND	A	A]SL4.0CH07:58278470]	1	0	59
SL4.0ch11	5039822	MantaBND:248144:1:2:0:0:0:0	SL4.0CH05	12196133	BND	A	[SL4.0CH05:12196133[A	34	0	26
SL4.0ch11	5870786	MantaBND:825865:0:2:0:0:0:1	SL4.0CH11	5930831	BND	T	TT]SL4.0CH11:5930831]	3	4	53
SL4.0ch11	5870786	MantaBND:344027:1:2:0:2:0:1	SL4.0CH11	5930831	BND	T	T]SL4.0CH11:5930831]	1	0	59
SL4.0ch11	5870788	MantaBND:825865:0:2:1:0:0:0	SL4.0CH11	5930829	BND	T	[SL4.0CH11:5930829[GT	6	3	51
SL4.0ch11	5930829	MantaBND:825865:0:2:1:0:0:1	SL4.0CH11	5870788	BND	A	[SL4.0CH11:5870788[CA	6	3	51
SL4.0ch11	5930831	MantaBND:825865:0:2:0:0:0:0	SL4.0CH11	5870786	BND	A	AA]SL4.0CH11:5870786],AAG]SL4.0CH11:5870785]	3	4	50
SL4.0ch11	5930831	MantaBND:344027:1:2:0:2:0:0	SL4.0CH11	5870786	BND	A	A]SL4.0CH11:5870786]	1	0	59
SL4.0ch11	6386443	MantaBND:557242:0:1:0:0:0:0	SL4.0CH07	60041727	BND	A	[SL4.0CH07:60041727[A	5	0	55
SL4.0ch11	7053635	MantaBND:103818:1:34:0:0:0:1	SL4.0CH12	27582300	BND	T	T]SL4.0CH12:27582300]	2	0	58
SL4.0ch11	7053643	MantaBND:97481:1:15:0:0:0:1	SL4.0CH12	27582352	BND	G	G]SL4.0CH12:27582352]	1	0	59
SL4.0ch11	7747914	MantaBND:151:6985:15985:0:0:0:0	SL4.0CH12	38329636	BND	C	C[SL4.0CH12:38329636[	40	0	20
SL4.0ch11	7796516	MantaBND:512861:0:1:0:3:0:1	SL4.0CH06	30972915	BND	A	A]SL4.0CH06:30972915]	2	0	58
SL4.0ch11	8014255	MantaBND:94499:1:10:1:0:0:1	SL4.0CH01	90081167	BND	A	]SL4.0CH01:90081167]A	6	0	54
SL4.0ch11	8030473	MantaBND:5009:1:2:0:0:0:0	SL4.0CH04	49815201	BND	T	T[SL4.0CH04:49815201[	9	0	51
SL4.0ch11	8030474	MantaBND:52616:51:61:0:0:0:0	SL4.0CH04	9808298	BND	G	[SL4.0CH04:9808298[TTGGGTCG	11	1	48
SL4.0ch11	8030474	MantaBND:52616:51:60:0:0:0:0	SL4.0CH04	18917170	BND	G	[SL4.0CH04:18917170[TTGGGTCG	11	0	49
SL4.0ch11	8730532	MantaBND:26:26194:26222:0:0:0:0	SL4.0CH09	59388427	BND	C	[SL4.0CH09:59388427[C	12	0	48
SL4.0ch11	9069669	MantaBND:279121:5:6:1:0:0:0	SL4.0CH11	9070256	BND	A	[SL4.0CH11:9070256[A	1	0	59
SL4.0ch11	9070256	MantaBND:279121:5:6:1:0:0:1	SL4.0CH11	9069669	BND	T	[SL4.0CH11:9069669[T	1	0	59
SL4.0ch11	9503424	MantaBND:897622:0:2:0:0:0:0	SL4.0CH11	9726780	BND	T	T]SL4.0CH11:9726780]	4	0	56
SL4.0ch11	9518482	MantaBND:168338:1:2:0:0:0:0	SL4.0CH11	9711335	BND	A	AGT]SL4.0CH11:9711335]	6	0	54
SL4.0ch11	9519998	MantaBND:2669:99:100:0:0:0:1	SL4.0CH11	9709917	BND	G	[SL4.0CH11:9709917[G	22	1	37
SL4.0ch11	9569586	MantaBND:818027:0:1:0:0:0:0	SL4.0CH11	9699051	BND	T	TTCATGCAATCATAATA]SL4.0CH11:9699051]	2	0	58
SL4.0ch11	9622168	MantaBND:143:20522:20535:0:0:0:0	SL4.0CH12	3197598	BND	A	]SL4.0CH12:3197598]A	4	0	56
SL4.0ch11	9699051	MantaBND:818027:0:1:0:0:0:1	SL4.0CH11	9569586	BND	A	ATATTATGATTGCATGA]SL4.0CH11:9569586]	2	0	58
SL4.0ch11	9709917	MantaBND:2669:99:100:0:0:0:0	SL4.0CH11	9519998	BND	C	[SL4.0CH11:9519998[C	22	1	37
SL4.0ch11	9711335	MantaBND:168338:1:2:0:0:0:1	SL4.0CH11	9518482	BND	A	AAC]SL4.0CH11:9518482]	6	0	54
SL4.0ch11	9726757	MantaBND:897622:0:2:0:0:0:1	SL4.0CH11	9503447	BND	A	A]SL4.0CH11:9503447]	4	0	56
SL4.0ch11	9858595	MantaBND:26:1339:1340:0:3:0:0	SL4.0CH01	32041363	BND	G	G[SL4.0CH01:32041363[	5	0	55
SL4.0ch11	9966771	MantaBND:26:26377:26379:0:0:0:0	SL4.0CH07	56521928	BND	A	[SL4.0CH07:56521928[A	7	0	53
SL4.0ch11	9966776	MantaBND:151:16116:16118:0:0:0:0	SL4.0CH10	54593414	BND	A	A[SL4.0CH10:54593414[	34	0	26
SL4.0ch11	10319616	MantaBND:309312:0:1:0:0:0:1	SL4.0CH04	52509938	BND	G	]SL4.0CH04:52509938]G	1	0	59
SL4.0ch11	10471682	MantaBND:174096:0:2:0:0:0:1	SL4.0CH02	48087021	BND	A	]SL4.0CH02:48087021]A	33	0	27
SL4.0ch11	10685529	MantaBND:13935:65:66:0:0:0:1	SL4.0CH06	26799444	BND	T	T[SL4.0CH06:26799444[	7	0	53
SL4.0ch11	10703970	MantaBND:387643:0:1:0:0:0:0	SL4.0CH05	20753482	BND	G	[SL4.0CH05:20753482[G	4	0	56
SL4.0ch11	10787490	MantaBND:20156:7:10:0:0:0:1	SL4.0CH10	19473222	BND	C	C]SL4.0CH10:19473222]	13	0	47
SL4.0ch11	10787498	MantaBND:143:24744:24746:0:5:0:1	SL4.0CH10	19473213	BND	A	AC]SL4.0CH10:19473213]	4	0	56
SL4.0ch11	12260127	MantaBND:123:4886:4892:0:0:0:1	SL4.0CH06	2742761	BND	C	]SL4.0CH06:2742761]C	1	0	59
SL4.0ch11	12260129	MantaBND:151:6156:6159:0:0:0:1	SL4.0CH06	2742767	BND	G	]SL4.0CH06:2742767]G,]SL4.0CH06:2742761]G	2	0	57
SL4.0ch11	14706180	MantaBND:144208:0:1:0:0:0:0	SL4.0CH03	7644653	BND	A	A]SL4.0CH03:7644653]	1	0	59
SL4.0ch11	14898316	MantaBND:301230:1:2:0:0:0:0	SL4.0CH04	20267879	BND	C	C[SL4.0CH04:20267879[	1	0	59
SL4.0ch11	15689270	MantaBND:777285:0:1:0:0:0:0	SL4.0CH11	15694800	BND	T	[SL4.0CH11:15694800[T	1	0	59
SL4.0ch11	15689293	MantaBND:777285:0:1:1:0:0:0	SL4.0CH11	15694755	BND	C	CGAGTGAGAAAA]SL4.0CH11:15694755]	1	10	49
SL4.0ch11	15694755	MantaBND:777285:0:1:1:0:0:1	SL4.0CH11	15689293	BND	T	TTTTTCTCACTC]SL4.0CH11:15689293]	1	10	49
SL4.0ch11	15694800	MantaBND:777285:0:1:0:0:0:1	SL4.0CH11	15689270	BND	T	[SL4.0CH11:15689270[T	1	0	59
SL4.0ch11	16135209	MantaBND:32:15725:15746:0:0:0:0	SL4.0CH08	61075996	BND	A	A[SL4.0CH08:61075996[	1	0	59
SL4.0ch11	16135220	MantaBND:32:15746:17503:0:0:0:0	SL4.0CH12	52335516	BND	G	G[SL4.0CH12:52335516[	1	0	59
SL4.0ch11	16309681	MantaBND:659601:1:2:0:0:0:0	SL4.0CH12	53864076	BND	C	[SL4.0CH12:53864076[GGC	10	0	50
SL4.0ch11	16783876	MantaBND:151:2905:2907:0:0:0:1	SL4.0CH02	33085055	BND	C	]SL4.0CH02:33085055]C	1	0	59
SL4.0ch11	16811534	MantaBND:151:16365:16366:0:0:0:1	SL4.0CH01	77180642	BND	A	AG[SL4.0CH01:77180642[	29	0	31
SL4.0ch11	16946336	MantaBND:26:16775:16777:0:0:0:0	SL4.0CH01	77180641	BND	A	A[SL4.0CH01:77180641[	6	0	54
SL4.0ch11	17278493	MantaBND:139389:0:1:0:0:0:0	SL4.0CH02	19889301	BND	A	A[SL4.0CH02:19889301[	7	0	53
SL4.0ch11	17293621	MantaBND:150859:0:1:0:0:0:0	SL4.0CH02	24534888	BND	T	]SL4.0CH02:24534888]T	1	0	59
SL4.0ch11	17438712	MantaBND:839780:0:1:1:0:0:0	SL4.0CH11	17440346	BND	C	C]SL4.0CH11:17440346]	6	25	29
SL4.0ch11	17438713	MantaBND:839780:0:1:0:0:0:0	SL4.0CH11	17440349	BND	T	[SL4.0CH11:17440349[T	21	4	35
SL4.0ch11	17440337	MantaBND:839780:0:1:0:0:0:1	SL4.0CH11	17438725	BND	T	[SL4.0CH11:17438725[T	21	4	35
SL4.0ch11	17440342	MantaBND:839780:0:1:1:0:0:1	SL4.0CH11	17438716	BND	T	T]SL4.0CH11:17438716]	6	25	29
SL4.0ch11	17869976	MantaBND:342814:1:2:0:0:0:1	SL4.0CH06	23123751	BND	G	G]SL4.0CH06:23123751]	1	0	59
SL4.0ch11	18600011	MantaBND:162:14457:25310:0:0:0:0	SL4.0CH11	18602127	BND	G	G]SL4.0CH11:18602127]	1	0	59
SL4.0ch11	18600012	MantaBND:24054:1:2:0:0:0:0	SL4.0CH11	18602107	BND	A	A]SL4.0CH11:18602107]	1	0	59
SL4.0ch11	18602107	MantaBND:24054:1:2:0:0:0:1	SL4.0CH11	18600012	BND	A	A]SL4.0CH11:18600012]	1	0	59
SL4.0ch11	18602127	MantaBND:162:14457:25310:0:0:0:1	SL4.0CH11	18600011	BND	A	A]SL4.0CH11:18600011]	1	0	59
SL4.0ch11	18865716	MantaBND:26:18700:27006:0:9:0:1	SL4.0CH07	52798832	BND	T	[SL4.0CH07:52798832[T	1	0	59
SL4.0ch11	19384075	MantaBND:123:847:852:0:0:0:1	SL4.0CH02	26061630	BND	A	[SL4.0CH02:26061630[CACTTAATTTGCA	3	0	57
SL4.0ch11	19490668	MantaBND:242770:0:1:0:0:0:1	SL4.0CH03	51628952	BND	T	T[SL4.0CH03:51628952[	1	0	59
SL4.0ch11	19697521	MantaBND:21923:1:2:0:0:0:0	SL4.0CH05	11716628	BND	G	[SL4.0CH05:11716628[G	1	0	59
SL4.0ch11	20557127	MantaBND:831549:0:1:0:3:0:0	SL4.0CH12	32316992	BND	C	C]SL4.0CH12:32316992]	6	0	54
SL4.0ch11	21475187	MantaBND:229505:1:3:0:0:0:0	SL4.0CH06	10463164	BND	A	]SL4.0CH06:10463164]A	1	0	59
SL4.0ch11	22256801	MantaBND:203804:1:2:0:0:0:0	SL4.0CH11	22421996	BND	C	C]SL4.0CH11:22421996]	1	32	27
SL4.0ch11	22283843	MantaBND:846260:0:1:0:0:0:0	SL4.0CH11	22792030	BND	A	[SL4.0CH11:22792030[A	2	31	27
SL4.0ch11	22311504	MantaBND:460729:4:5:0:0:0:0	SL4.0CH11	22605513	BND	C	[SL4.0CH11:22605513[AC	5	0	55
SL4.0ch11	22421995	MantaBND:203804:1:2:0:0:0:1	SL4.0CH11	22256802	BND	G	G]SL4.0CH11:22256802]	1	32	27
SL4.0ch11	22605513	MantaBND:460729:4:5:0:0:0:1	SL4.0CH11	22311504	BND	T	[SL4.0CH11:22311504[TT	5	0	55
SL4.0ch11	22792029	MantaBND:846260:0:1:0:0:0:1	SL4.0CH11	22283844	BND	T	[SL4.0CH11:22283844[T	2	31	27
SL4.0ch11	22954790	MantaBND:278152:0:1:0:0:0:1	SL4.0CH05	24876679	BND	C	]SL4.0CH05:24876679]C	1	0	59
SL4.0ch11	26255397	MantaBND:325221:0:1:0:3:0:0	SL4.0CH05	40384252	BND	A	[SL4.0CH05:40384252[A	1	0	59
SL4.0ch11	26349863	MantaBND:14578:1:2:0:0:0:1	SL4.0CH07	24190953	BND	A	A]SL4.0CH07:24190953]	2	0	58
SL4.0ch11	29117601	MantaBND:179685:1:2:0:0:0:1	SL4.0CH10	300445	BND	A	A]SL4.0CH10:300445]	1	0	59
SL4.0ch11	30049606	MantaBND:26:5118:18408:0:6:0:0	SL4.0CH09	17386572	BND	G	G]SL4.0CH09:17386572]	6	0	54
SL4.0ch11	30763905	MantaBND:169150:0:1:0:3:0:1	SL4.0CH02	43176805	BND	A	[SL4.0CH02:43176805[AGTGTTGAAACTTAAGCACTTAAGGAA	51	0	9
SL4.0ch11	30854134	MantaBND:550415:0:1:0:2:0:0	SL4.0CH07	57647186	BND	T	TATTCGTTAACTTTATCAAATTTTCGTTTTGTCGAAGAAA[SL4.0CH07:57647186[	4	0	56
SL4.0ch11	34167728	MantaBND:289069:0:1:0:0:0:0	SL4.0CH05	35085475	BND	A	A[SL4.0CH05:35085475[	1	0	59
SL4.0ch11	37099525	MantaBND:337889:0:1:0:3:0:0	SL4.0CH05	15629365	BND	T	TT]SL4.0CH05:15629365]	1	0	59
SL4.0ch11	38752361	MantaBND:531188:1:4:0:0:0:0	SL4.0CH09	23097284	BND	A	A[SL4.0CH09:23097284[	1	0	59
SL4.0ch11	38888496	MantaBND:222897:1:2:1:0:0:1	SL4.0CH07	6737605	BND	T	]SL4.0CH07:6737605]T	1	0	59
SL4.0ch11	43720093	MantaBND:188447:1:2:0:5:0:1	SL4.0CH03	35986839	BND	T	]SL4.0CH03:35986839]T	6	0	54
SL4.0ch11	46077177	MantaBND:296179:4:7:0:0:0:0	SL4.0CH10	64574179	BND	T	]SL4.0CH10:64574179]T	8	0	52
SL4.0ch11	46123822	MantaBND:162:9369:13337:0:0:0:1	SL4.0CH06	23156584	BND	C	]SL4.0CH06:23156584]C	2	0	58
SL4.0ch11	46124145	MantaBND:162:9369:13337:1:0:0:1	SL4.0CH06	23156646	BND	A	A[SL4.0CH06:23156646[	5	0	55
SL4.0ch11	46339345	MantaBND:151:10608:10610:0:0:0:0	SL4.0CH05	62604164	BND	T	]SL4.0CH05:62604164]T	3	2	55
SL4.0ch11	46343871	MantaBND:26:13973:13977:1:0:0:1	SL4.0CH05	62604160	BND	A	A[SL4.0CH05:62604160[	1	0	59
SL4.0ch11	46958178	MantaBND:26:28739:28741:0:0:0:1	SL4.0CH02	51953161	BND	A	A[SL4.0CH02:51953161[	5	0	55
SL4.0ch11	47028148	MantaBND:235719:1:1:3:0:0:0	SL4.0CH11	47028531	BND	A	[SL4.0CH11:47028531[A	2	3	55
SL4.0ch11	47028531	MantaBND:235719:1:1:3:0:0:1	SL4.0CH11	47028148	BND	C	[SL4.0CH11:47028148[C	2	3	55
SL4.0ch11	47295204	MantaBND:143:11901:11908:0:1:0:1	SL4.0CH01	87986428	BND	C	C]SL4.0CH01:87986428]	0	2	58
SL4.0ch11	47942884	MantaBND:21393:1:3:0:0:0:1	SL4.0CH01	11214573	BND	C	C]SL4.0CH01:11214573]	10	0	50
SL4.0ch11	48314870	MantaBND:215693:1:2:0:0:0:1	SL4.0CH04	42877134	BND	T	T[SL4.0CH04:42877134[	3	0	57
SL4.0ch11	48314876	MantaBND:312408:0:1:0:0:0:1	SL4.0CH04	42877104	BND	A	A[SL4.0CH04:42877104[	2	0	58
SL4.0ch11	48314877	MantaBND:235998:0:1:0:0:0:1	SL4.0CH04	42877081	BND	A	A[SL4.0CH04:42877081[	2	0	58
SL4.0ch11	48314877	MantaBND:150350:10:12:0:0:0:1	SL4.0CH04	42877092	BND	A	A[SL4.0CH04:42877092[	2	0	58
SL4.0ch11	48314877	MantaBND:261620:0:1:0:0:0:1	SL4.0CH04	42877083	BND	A	A[SL4.0CH04:42877083[	1	0	59
SL4.0ch11	48314899	MantaBND:261620:1:2:0:0:0:0	SL4.0CH04	42878482	BND	C	]SL4.0CH04:42878482]C	2	0	58
SL4.0ch11	48314906	MantaBND:215693:2:3:0:0:0:0	SL4.0CH04	42878482	BND	A	]SL4.0CH04:42878482]A	4	0	56
SL4.0ch11	48315011	MantaBND:26:28906:28922:0:0:0:0	SL4.0CH04	42878519	BND	T	]SL4.0CH04:42878519]T	1	0	59
SL4.0ch11	48460961	MantaBND:316455:1:2:0:0:0:1	SL4.0CH04	47218034	BND	A	[SL4.0CH04:47218034[A	28	1	31
SL4.0ch11	49460806	MantaBND:143:22442:22444:0:0:0:0	SL4.0CH09	58034196	BND	T	]SL4.0CH09:58034196]T	15	0	45
SL4.0ch11	49460813	MantaBND:13936:9:12:0:0:0:0	SL4.0CH09	58033787	BND	T	TA[SL4.0CH09:58033787[	20	0	40
SL4.0ch11	49780842	MantaBND:13059:5:7:0:0:0:0	SL4.0CH03	57960985	BND	T	[SL4.0CH03:57960985[T	16	0	44
SL4.0ch11	50643002	MantaBND:207016:2:3:0:0:0:1	SL4.0CH09	45971435	BND	A	A[SL4.0CH09:45971435[	2	0	58
SL4.0ch11	51735170	MantaBND:646083:0:1:0:0:0:1	SL4.0CH09	6156245	BND	A	]SL4.0CH09:6156245]A	1	0	59
SL4.0ch11	52342914	MantaBND:26:29100:29110:0:1:0:0	SL4.0CH11	52598208	BND	A	A]SL4.0CH11:52598208]	11	0	49
SL4.0ch11	52342953	MantaBND:26:29100:29106:0:0:0:0	SL4.0CH11	52597312	BND	A	[SL4.0CH11:52597312[A	11	0	49
SL4.0ch11	52349186	MantaBND:16280:9:10:0:0:0:1	SL4.0CH04	48714826	BND	A	A]SL4.0CH04:48714826]	1	6	53
SL4.0ch11	52597258	MantaBND:26:29100:29106:0:0:0:1	SL4.0CH11	52343007	BND	A	[SL4.0CH11:52343007[A	11	0	49
SL4.0ch11	52598164	MantaBND:26:29100:29110:0:1:0:1	SL4.0CH11	52342958	BND	T	T]SL4.0CH11:52342958]	11	0	49
SL4.0ch11	52807870	MantaBND:156527:6:9:0:1:0:0	SL4.0CH07	60621569	BND	A	]SL4.0CH07:60621569]CATA	4	0	56
SL4.0ch11	52946655	MantaBND:868006:0:1:0:2:0:1	SL4.0CH11	53238217	BND	T	T]SL4.0CH11:53238217]	0	2	58
SL4.0ch11	52946656	MantaBND:868006:0:1:1:2:0:1	SL4.0CH11	53238218	BND	T	[SL4.0CH11:53238218[T	2	0	58
SL4.0ch11	52953263	MantaBND:149318:0:1:0:0:0:0	SL4.0CH02	48877730	BND	T	]SL4.0CH02:48877730]T	1	0	59
SL4.0ch11	52953278	MantaBND:134914:1:2:0:0:0:1	SL4.0CH05	20510622	BND	G	[SL4.0CH05:20510622[G	1	0	59
SL4.0ch11	52958958	MantaBND:26:32850:32917:0:0:0:1	SL4.0CH11	53163544	BND	T	TATCA]SL4.0CH11:53163544]	9	0	51
SL4.0ch11	52984433	MantaBND:32:18828:18831:0:4:0:1	SL4.0CH11	53356345	BND	T	T]SL4.0CH11:53356345]	18	0	42
SL4.0ch11	53119019	MantaBND:151:15469:15471:0:0:0:1	SL4.0CH10	61541215	BND	C	]SL4.0CH10:61541215]C	10	0	50
SL4.0ch11	53119024	MantaBND:162:17792:24315:1:0:0:1	SL4.0CH10	61540886	BND	T	T[SL4.0CH10:61540886[	2	0	58
SL4.0ch11	53119036	MantaBND:26:16106:25264:0:0:0:1	SL4.0CH10	61541215	BND	A	]SL4.0CH10:61541215]A	3	0	57
SL4.0ch11	53119052	MantaBND:32:10671:16445:0:0:0:1	SL4.0CH10	61541215	BND	T	]SL4.0CH10:61541215]T	5	0	55
SL4.0ch11	53119053	MantaBND:162:17792:24315:0:0:0:1	SL4.0CH10	61541215	BND	T	]SL4.0CH10:61541215]T	4	0	56
SL4.0ch11	53119061	MantaBND:32:10671:16445:1:0:0:1	SL4.0CH10	61540894	BND	T	T[SL4.0CH10:61540894[	1	0	59
SL4.0ch11	53119106	MantaBND:26:16106:25264:1:0:0:1	SL4.0CH10	61540891	BND	T	T[SL4.0CH10:61540891[	1	0	59
SL4.0ch11	53119107	MantaBND:143:5698:19897:1:0:0:1	SL4.0CH10	61540891	BND	T	T[SL4.0CH10:61540891[	3	0	57
SL4.0ch11	53119125	MantaBND:151:15469:15471:1:0:0:1	SL4.0CH10	61540896	BND	G	G[SL4.0CH10:61540896[	3	0	57
SL4.0ch11	53163544	MantaBND:26:32850:32917:0:0:0:0	SL4.0CH11	52958958	BND	A	ATGAT]SL4.0CH11:52958958]	9	0	51
SL4.0ch11	53238215	MantaBND:868006:0:1:0:2:0:0	SL4.0CH11	52946657	BND	T	T]SL4.0CH11:52946657]	0	2	58
SL4.0ch11	53238216	MantaBND:868006:0:1:1:2:0:0	SL4.0CH11	52946658	BND	T	[SL4.0CH11:52946658[T	2	0	58
SL4.0ch11	53356343	MantaBND:32:18828:18831:0:4:0:0	SL4.0CH11	52984435	BND	C	C]SL4.0CH11:52984435]	18	0	42
SL4.0ch12	582711	MantaBND:251208:0:1:0:0:0:0	SL4.0CH04	7451549	BND	A	A[SL4.0CH04:7451549[	1	0	59
SL4.0ch12	1199528	MantaBND:20211:0:1:0:0:0:0	SL4.0CH01	9574103	BND	T	[SL4.0CH01:9574103[T,[SL4.0CH01:9574061[T	12	1	45
SL4.0ch12	1199551	MantaBND:17648:0:1:0:0:0:0	SL4.0CH01	9574061	BND	T	[SL4.0CH01:9574061[T	8	0	52
SL4.0ch12	1199566	MantaBND:20485:0:1:0:0:0:0	SL4.0CH01	9574106	BND	T	[SL4.0CH01:9574106[T	4	0	56
SL4.0ch12	1199568	MantaBND:21427:0:1:0:0:0:0	SL4.0CH01	9574106	BND	A	[SL4.0CH01:9574106[A	4	0	56
SL4.0ch12	1199593	MantaBND:20772:0:1:0:0:0:0	SL4.0CH01	9574103	BND	A	[SL4.0CH01:9574103[A	1	0	59
SL4.0ch12	2501641	MantaBND:656148:0:2:0:0:0:1	SL4.0CH09	12047329	BND	A	A]SL4.0CH09:12047329]	3	0	57
SL4.0ch12	3019682	MantaBND:481779:0:1:0:1:0:1	SL4.0CH06	38534462	BND	T	[SL4.0CH06:38534462[T	7	0	53
SL4.0ch12	3197598	MantaBND:143:20522:20535:0:0:0:1	SL4.0CH11	9622168	BND	A	A[SL4.0CH11:9622168[	4	0	56
SL4.0ch12	3739201	MantaBND:123:12233:12234:0:0:0:1	SL4.0CH08	31875227	BND	T	[SL4.0CH08:31875227[T,[SL4.0CH08:31875195[T,[SL4.0CH08:31875216[T	1	0	55
SL4.0ch12	4230248	MantaBND:112465:0:1:0:0:0:1	SL4.0CH01	89348538	BND	A	A]SL4.0CH01:89348538]	0	1	59
SL4.0ch12	4230263	MantaBND:112465:0:1:1:0:0:0	SL4.0CH01	89348545	BND	A	[SL4.0CH01:89348545[A	1	0	59
SL4.0ch12	4601770	MantaBND:733551:0:1:0:0:0:0	SL4.0CH09	62815700	BND	T	[SL4.0CH09:62815700[T	1	1	58
SL4.0ch12	4661748	MantaBND:32:14448:14450:0:0:0:1	SL4.0CH03	57841677	BND	T	TTCC]SL4.0CH03:57841677]	10	1	49
SL4.0ch12	4667445	MantaBND:691006:0:1:0:0:0:1	SL4.0CH12	4670670	BND	A	[SL4.0CH12:4670670[A	2	5	53
SL4.0ch12	4667680	MantaBND:762614:0:1:0:0:0:0	SL4.0CH12	4668894	BND	C	C]SL4.0CH12:4668894]	10	0	50
SL4.0ch12	4668891	MantaBND:762614:0:1:0:0:0:1	SL4.0CH12	4667683	BND	A	A]SL4.0CH12:4667683]	10	0	50
SL4.0ch12	4670664	MantaBND:691006:0:1:0:0:0:0	SL4.0CH12	4667451	BND	T	[SL4.0CH12:4667451[T	2	5	53
SL4.0ch12	5723767	MantaBND:211084:0:1:0:0:0:0	SL4.0CH03	61394395	BND	A	]SL4.0CH03:61394395]A	3	0	57
SL4.0ch12	7694713	MantaBND:162:21058:21064:0:0:0:1	SL4.0CH06	21270202	BND	A	AG]SL4.0CH06:21270202]	4	0	56
SL4.0ch12	14621389	MantaBND:13866:4:11:0:0:0:1	SL4.0CH06	6768713	BND	T	T[SL4.0CH06:6768713[	1	0	59
SL4.0ch12	14971247	MantaBND:376449:0:1:0:1:0:1	SL4.0CH05	34098567	BND	A	]SL4.0CH05:34098567]TA	1	0	59
SL4.0ch12	17900774	MantaBND:123:430:14699:0:0:0:0	SL4.0CH12	18002549	BND	A	A]SL4.0CH12:18002549]	0	3	57
SL4.0ch12	18002543	MantaBND:123:430:14699:0:0:0:1	SL4.0CH12	17900780	BND	C	C]SL4.0CH12:17900780]	0	3	57
SL4.0ch12	20841131	MantaBND:394024:0:1:0:0:0:1	SL4.0CH05	46003435	BND	A	[SL4.0CH05:46003435[A	1	0	59
SL4.0ch12	21885070	MantaBND:1103839:1:2:0:0:0:0	SL4.0CH09	33642857	BND	C	C]SL4.0CH09:33642857]	1	0	59
SL4.0ch12	23135678	MantaBND:74220:0:1:0:0:0:0	SL4.0CH01	70253741	BND	A	A[SL4.0CH01:70253741[	1	0	59
SL4.0ch12	23423015	MantaBND:355181:0:1:0:2:0:0	SL4.0CH05	29248362	BND	A	]SL4.0CH05:29248362]A	1	0	59
SL4.0ch12	25518687	MantaBND:782639:0:1:0:0:0:1	SL4.0CH12	25520595	BND	G	G]SL4.0CH12:25520595]	0	3	57
SL4.0ch12	25519172	MantaBND:782773:0:1:0:0:0:0	SL4.0CH12	25687278	BND	A	[SL4.0CH12:25687278[A	0	3	57
SL4.0ch12	25520592	MantaBND:782639:0:1:0:0:0:0	SL4.0CH12	25518690	BND	T	T]SL4.0CH12:25518690]	0	3	57
SL4.0ch12	25687276	MantaBND:782773:0:1:0:0:0:1	SL4.0CH12	25519174	BND	C	[SL4.0CH12:25519174[C	0	3	57
SL4.0ch12	26242822	MantaBND:264367:0:1:0:0:0:1	SL4.0CH04	10510597	BND	C	C]SL4.0CH04:10510597]	5	0	55
SL4.0ch12	26310514	MantaBND:300534:0:1:0:0:0:1	SL4.0CH04	45181969	BND	T	]SL4.0CH04:45181969]T	1	0	59
SL4.0ch12	26415788	MantaBND:54479:3:4:0:0:0:0	SL4.0CH01	80809473	BND	G	]SL4.0CH01:80809473]G	1	0	59
SL4.0ch12	26415792	MantaBND:31442:1:3:0:0:0:0	SL4.0CH01	80809503	BND	T	]SL4.0CH01:80809503]T,]SL4.0CH01:80809530]T	4	0	55
SL4.0ch12	26415794	MantaBND:32:1996:2065:0:0:0:0	SL4.0CH01	80809530	BND	T	]SL4.0CH01:80809530]T,]SL4.0CH01:80809524]T	1	0	59
SL4.0ch12	26415795	MantaBND:26:3293:3367:0:0:0:0	SL4.0CH01	80809489	BND	T	]SL4.0CH01:80809489]T	2	0	58
SL4.0ch12	26689712	MantaBND:51138:2:5:0:0:0:1	SL4.0CH09	25752518	BND	A	]SL4.0CH09:25752518]A	2	0	58
SL4.0ch12	26831766	MantaBND:664219:0:1:0:0:0:1	SL4.0CH10	17002073	BND	T	[SL4.0CH10:17002073[T	1	0	59
SL4.0ch12	27582300	MantaBND:103818:1:34:0:0:0:0	SL4.0CH11	7053635	BND	T	T]SL4.0CH11:7053635]	2	0	58
SL4.0ch12	27582352	MantaBND:97481:1:15:0:0:0:0	SL4.0CH11	7053643	BND	G	G]SL4.0CH11:7053643]	1	0	59
SL4.0ch12	27584145	MantaBND:112356:12:15:0:0:0:0	SL4.0CH04	59042319	BND	C	C]SL4.0CH04:59042319]	3	0	57
SL4.0ch12	27584187	MantaBND:102980:3:4:0:0:0:0	SL4.0CH04	59042319	BND	T	T]SL4.0CH04:59042319]	2	0	58
SL4.0ch12	28169365	MantaBND:487612:1:2:0:0:0:1	SL4.0CH08	1269758	BND	A	AGT]SL4.0CH08:1269758]	3	0	57
SL4.0ch12	28169435	MantaBND:487612:0:1:0:0:0:0	SL4.0CH08	1269339	BND	A	[SL4.0CH08:1269339[A	3	0	57
SL4.0ch12	28900831	MantaBND:131952:0:1:0:0:0:0	SL4.0CH02	10092163	BND	C	C]SL4.0CH02:10092163]	1	0	59
SL4.0ch12	30436356	MantaBND:410765:0:1:0:1:0:1	SL4.0CH05	60996479	BND	C	C]SL4.0CH05:60996479]	1	0	59
SL4.0ch12	31243295	MantaBND:320918:0:3:0:0:0:1	SL4.0CH04	49173993	BND	G	]SL4.0CH04:49173993]AG	3	0	57
SL4.0ch12	31326704	MantaBND:250277:3:4:0:0:0:0	SL4.0CH09	45147190	BND	A	]SL4.0CH09:45147190]A	2	0	58
SL4.0ch12	32316982	MantaBND:831549:0:1:0:3:0:1	SL4.0CH11	20557137	BND	C	C]SL4.0CH11:20557137]	6	0	54
SL4.0ch12	32866643	MantaBND:355038:1:2:0:1:0:0	SL4.0CH07	16286231	BND	T	T[SL4.0CH07:16286231[	47	0	13
SL4.0ch12	33585688	MantaBND:790499:0:1:0:0:0:1	SL4.0CH12	33608418	BND	T	[SL4.0CH12:33608418[T	1	2	57
SL4.0ch12	33591509	MantaBND:790499:0:3:0:0:0:0	SL4.0CH12	33608223	BND	G	GG]SL4.0CH12:33608223]	0	3	57
SL4.0ch12	33608223	MantaBND:790499:0:3:0:0:0:1	SL4.0CH12	33591509	BND	C	CC]SL4.0CH12:33591509]	0	3	57
SL4.0ch12	33608417	MantaBND:790499:0:1:0:0:0:0	SL4.0CH12	33585689	BND	A	[SL4.0CH12:33585689[A	1	2	57
SL4.0ch12	34024216	MantaBND:394038:0:1:0:0:0:1	SL4.0CH06	23386420	BND	A	A[SL4.0CH06:23386420[	1	0	59
SL4.0ch12	35271110	MantaBND:73689:1:11:0:0:0:0	SL4.0CH10	33586284	BND	C	]SL4.0CH10:33586284]C	1	0	59
SL4.0ch12	35721915	MantaBND:792836:0:1:0:0:0:0	SL4.0CH12	36933704	BND	T	T]SL4.0CH12:36933704]	30	0	30
SL4.0ch12	35844287	MantaBND:237937:2:3:0:2:0:0	SL4.0CH12	37021546	BND	T	T]SL4.0CH12:37021546]	41	0	19
SL4.0ch12	36587323	MantaBND:117166:3:4:0:0:0:0	SL4.0CH06	17930834	BND	T	T]SL4.0CH06:17930834]	1	0	59
SL4.0ch12	36933699	MantaBND:792836:0:1:0:0:0:1	SL4.0CH12	35721920	BND	C	C]SL4.0CH12:35721920]	30	0	30
SL4.0ch12	37021543	MantaBND:237937:2:3:0:2:0:1	SL4.0CH12	35844290	BND	A	A]SL4.0CH12:35844290]	41	0	19
SL4.0ch12	38329636	MantaBND:151:6985:15985:0:0:0:1	SL4.0CH11	7747914	BND	T	]SL4.0CH11:7747914]T	40	0	20
SL4.0ch12	39023222	MantaBND:795558:0:1:0:0:0:1	SL4.0CH12	39067384	BND	A	A]SL4.0CH12:39067384]	0	3	57
SL4.0ch12	39063654	MantaBND:795719:0:1:0:0:0:1	SL4.0CH12	39067995	BND	T	[SL4.0CH12:39067995[T	0	3	57
SL4.0ch12	39067384	MantaBND:795558:0:1:0:0:0:0	SL4.0CH12	39023222	BND	A	A]SL4.0CH12:39023222]	0	3	57
SL4.0ch12	39067993	MantaBND:795719:0:1:0:0:0:0	SL4.0CH12	39063656	BND	A	[SL4.0CH12:39063656[A	0	3	57
SL4.0ch12	42380753	MantaBND:228618:0:1:0:0:0:0	SL4.0CH04	35771927	BND	C	[SL4.0CH04:35771927[C	1	0	59
SL4.0ch12	42480438	MantaBND:265517:0:5:0:0:0:0	SL4.0CH04	11739405	BND	G	[SL4.0CH04:11739405[G	2	0	58
SL4.0ch12	43850203	MantaBND:134182:1:4:0:0:0:0	SL4.0CH03	15153827	BND	T	TT[SL4.0CH03:15153827[	3	0	57
SL4.0ch12	43850203	MantaBND:134182:3:4:0:1:0:0	SL4.0CH03	15155873	BND	T	]SL4.0CH03:15155873]T	3	0	57
SL4.0ch12	43931269	MantaBND:143:5095:5100:0:0:0:1	SL4.0CH04	61213	BND	T	[SL4.0CH04:61213[T	1	0	59
SL4.0ch12	44526900	MantaBND:591756:0:1:0:0:0:0	SL4.0CH12	50593616	BND	T	T]SL4.0CH12:50593616]	13	0	47
SL4.0ch12	44526931	MantaBND:4987:10:11:0:0:0:0	SL4.0CH12	50593628	BND	T	T]SL4.0CH12:50593628]	5	0	55
SL4.0ch12	44526931	MantaBND:915947:0:1:0:0:0:0	SL4.0CH12	50593620	BND	T	T]SL4.0CH12:50593620]	3	0	57
SL4.0ch12	44526931	MantaBND:801403:0:1:0:0:0:0	SL4.0CH12	50593612	BND	T	T]SL4.0CH12:50593612]	2	0	58
SL4.0ch12	44526931	MantaBND:155751:1:3:0:0:0:0	SL4.0CH12	50593643	BND	T	T]SL4.0CH12:50593643]	2	0	58
SL4.0ch12	44526935	MantaBND:387461:1:2:0:0:0:1	SL4.0CH12	50593607	BND	A	A]SL4.0CH12:50593607]	4	0	56
SL4.0ch12	45315295	MantaBND:265830:0:1:1:0:0:1	SL4.0CH04	18273142	BND	A	]SL4.0CH04:18273142]A	8	0	52
SL4.0ch12	45554425	MantaBND:59795:0:1:0:0:0:0	SL4.0CH01	39438393	BND	T	T]SL4.0CH01:39438393]	1	0	59
SL4.0ch12	45806757	MantaBND:26:7518:7557:0:0:0:1	SL4.0CH05	49987161	BND	G	G[SL4.0CH05:49987161[	6	0	54
SL4.0ch12	45806772	MantaBND:32:11196:11200:0:0:0:1	SL4.0CH05	49987161	BND	T	T[SL4.0CH05:49987161[	7	0	53
SL4.0ch12	45806842	MantaBND:123:14428:14439:0:0:0:1	SL4.0CH05	49987161	BND	A	A[SL4.0CH05:49987161[	11	0	49
SL4.0ch12	45806853	MantaBND:151:16213:16214:0:0:0:1	SL4.0CH05	49987150	BND	T	T[SL4.0CH05:49987150[	8	0	52
SL4.0ch12	50236204	MantaBND:198209:2:4:0:0:0:1	SL4.0CH12	50288647	BND	C	C]SL4.0CH12:50288647]	1	13	46
SL4.0ch12	50259479	MantaBND:156666:4:7:0:0:0:1	SL4.0CH04	46892181	BND	A	[SL4.0CH04:46892181[A	6	0	54
SL4.0ch12	50259481	MantaBND:213380:6:9:0:0:0:1	SL4.0CH04	46892166	BND	T	[SL4.0CH04:46892166[T	2	0	58
SL4.0ch12	50259482	MantaBND:14941:3:6:0:0:0:1	SL4.0CH04	46892162	BND	T	[SL4.0CH04:46892162[T	2	0	58
SL4.0ch12	50259484	MantaBND:198036:3:4:0:0:0:1	SL4.0CH04	46892181	BND	A	[SL4.0CH04:46892181[A	2	0	58
SL4.0ch12	50260763	MantaBND:14941:3:6:2:3:0:1	SL4.0CH04	46892120	BND	T	T]SL4.0CH04:46892120]	4	0	56
SL4.0ch12	50288647	MantaBND:198209:2:4:0:0:0:0	SL4.0CH12	50236204	BND	A	A]SL4.0CH12:50236204]	1	13	46
SL4.0ch12	50378562	MantaBND:219257:2:7:0:0:0:1	SL4.0CH08	21998883	BND	T	]SL4.0CH08:21998883]TTAGT	3	0	57
SL4.0ch12	50557017	MantaBND:352081:4:5:0:0:0:0	SL4.0CH06	3840549	BND	T	]SL4.0CH06:3840549]T	6	0	54
SL4.0ch12	50593607	MantaBND:387461:1:2:0:0:0:0	SL4.0CH12	44526935	BND	A	A]SL4.0CH12:44526935]	4	0	56
SL4.0ch12	50593612	MantaBND:801403:0:1:0:0:0:1	SL4.0CH12	44526931	BND	A	A]SL4.0CH12:44526931]	2	0	58
SL4.0ch12	50593616	MantaBND:591756:0:1:0:0:0:1	SL4.0CH12	44526900	BND	T	T]SL4.0CH12:44526900]	13	0	47
SL4.0ch12	50593620	MantaBND:915947:0:1:0:0:0:1	SL4.0CH12	44526931	BND	G	G]SL4.0CH12:44526931]	3	0	57
SL4.0ch12	50593628	MantaBND:4987:10:11:0:0:0:1	SL4.0CH12	44526931	BND	G	G]SL4.0CH12:44526931]	5	0	55
SL4.0ch12	50593643	MantaBND:155751:1:3:0:0:0:1	SL4.0CH12	44526931	BND	A	A]SL4.0CH12:44526931]	2	0	58
SL4.0ch12	50866106	MantaBND:738794:0:2:0:0:0:1	SL4.0CH09	57828895	BND	A	ACTCAAGGATGAAGTTTAT[SL4.0CH09:57828895[	2	0	58
SL4.0ch12	52335516	MantaBND:32:15746:17503:0:0:0:1	SL4.0CH11	16135220	BND	A	]SL4.0CH11:16135220]A	1	0	59
SL4.0ch12	53864076	MantaBND:659601:1:2:0:0:0:1	SL4.0CH11	16309681	BND	C	[SL4.0CH11:16309681[CCC	10	0	50
SL4.0ch12	55188992	MantaBND:10555:27:51:0:0:0:0	SL4.0CH09	43456246	BND	G	]SL4.0CH09:43456246]G	1	0	59
SL4.0ch12	55199154	MantaBND:151:12329:12331:0:0:0:1	SL4.0CH09	34339993	BND	A	]SL4.0CH09:34339993]A	2	0	58
SL4.0ch12	55504354	MantaBND:26:32509:32510:0:0:0:1	SL4.0CH05	15222759	BND	A	[SL4.0CH05:15222759[A	11	0	49
SL4.0ch12	57352484	MantaBND:946481:0:0:1:1:0:0	SL4.0CH12	57352758	BND	T	TACT]SL4.0CH12:57352758]	6	27	27
SL4.0ch12	57352758	MantaBND:946481:0:0:1:1:0:1	SL4.0CH12	57352484	BND	A	AAGT]SL4.0CH12:57352484]	6	27	27
SL4.0ch12	57950812	MantaBND:15010:12:13:0:0:0:1	SL4.0CH02	42344435	BND	T	]SL4.0CH02:42344435]T	4	0	56
SL4.0ch12	58791381	MantaBND:250277:0:1:0:0:0:1	SL4.0CH03	62264164	BND	C	[SL4.0CH03:62264164[C	2	0	58
SL4.0ch12	58791676	MantaBND:250277:1:1:1:1:0:1	SL4.0CH12	58791973	BND	A	A]SL4.0CH12:58791973]	6	0	54
SL4.0ch12	58791967	MantaBND:250277:1:1:1:1:0:0	SL4.0CH12	58791682	BND	G	G]SL4.0CH12:58791682]	6	0	54
SL4.0ch12	60434702	MantaBND:162:6235:6239:0:0:0:1	SL4.0CH02	39998368	BND	A	A[SL4.0CH02:39998368[	1	0	59
SL4.0ch12	60434705	MantaBND:123:3096:3097:0:0:0:1	SL4.0CH02	39996288	BND	T	T[SL4.0CH02:39996288[	1	0	59
SL4.0ch12	60434715	MantaBND:143:3908:3914:0:0:0:1	SL4.0CH02	39998407	BND	A	A[SL4.0CH02:39998407[	1	0	59
SL4.0ch12	61317704	MantaBND:93729:1:2:0:0:0:0	SL4.0CH06	30793967	BND	T	[SL4.0CH06:30793967[T	1	0	59
SL4.0ch12	62568441	MantaBND:257967:0:1:0:0:0:1	SL4.0CH04	5296850	BND	T	T[SL4.0CH04:5296850[	1	0	59
SL4.0ch12	62568449	MantaBND:33146:19:20:0:0:0:1	SL4.0CH04	5296844	BND	A	A[SL4.0CH04:5296844[	1	0	59
SL4.0ch12	62584389	MantaINS:123:15489:15489:0:0:1	SL4.0CH01	80831642	BND	AGTAAGAAGAA	AAAGGTGATGCTAAGAAGAAATGAGTCTTGCGCAGACAAAAATCTCATTTTGGGATTCTTTGGATTCAAAGTTCCCTTGCTATCCGAGTAGCCAAGGGGTAGTATTAGT,AAA[SL4.0CH01:80831642[GTAAGAAGAA	0	2	56
[truncated: 23,327 more rows]

## Sheet: Supplementary Table 3
Supplementary Table 3: Physical map of the structural variants identified in 3 wild tomato accessions in this study, sorted by SV type and physical map.
Chromosome	Position	Name	Alt_BND_Chr	Alt_BND_Pos	SV_Type	REF	ALT	nHet	nHomAlt	nHomRef
SL4.0ch00	1062561	MantaBND:128:602:716:0:0:0:0	SL4.0CH12	18026005	BND	G	]SL4.0CH12:18026005]G	1	0	59
SL4.0ch00	3603558	MantaBND:2186:7:8:0:0:0:0	SL4.0CH10	16110375	BND	C	[SL4.0CH10:16110375[C	1	0	59
SL4.0ch00	4527184	MantaBND:128:31447:31448:0:0:0:1	SL4.0CH09	5374944	BND	A	]SL4.0CH09:5374944]A	2	0	58
SL4.0ch00	6085536	MantaBND:128:1315:1316:0:0:0:1	SL4.0CH02	9402945	BND	C	C[SL4.0CH02:9402945[	1	0	59
SL4.0ch00	7628352	MantaBND:5948:0:1:0:0:0:0	SL4.0CH06	14617363	BND	A	A]SL4.0CH06:14617363]	1	0	59
SL4.0ch00	8300006	MantaBND:6244:0:1:0:0:0:1	SL4.0CH02	9258146	BND	A	ACG[SL4.0CH02:9258146[	1	0	59
SL4.0ch00	8383526	MantaBND:128:2663:2665:0:0:0:0	SL4.0CH02	27002824	BND	G	[SL4.0CH02:27002824[G	0	1	59
SL4.0ch01	213735	MantaBND:8833:0:1:0:0:0:0	SL4.0CH08	63305087	BND	A	[SL4.0CH08:63305087[A	1	0	59
SL4.0ch01	592982	MantaBND:9227:5:6:0:1:0:0	SL4.0CH03	47211749	BND	A	[SL4.0CH03:47211749[A	1	0	59
SL4.0ch01	1070763	MantaBND:11094:0:1:0:0:0:0	SL4.0CH07	50842279	BND	T	[SL4.0CH07:50842279[T	1	0	59
SL4.0ch01	1071036	MantaBND:11094:0:1:1:0:0:0	SL4.0CH07	50842668	BND	A	A]SL4.0CH07:50842668]	1	0	59
SL4.0ch01	1105692	MantaBND:11227:0:1:0:0:0:1	SL4.0CH01	1209047	BND	A	[SL4.0CH01:1209047[A	1	0	59
SL4.0ch01	1130210	MantaBND:128:10818:10824:0:0:0:0	SL4.0CH03	63938863	BND	C	[SL4.0CH03:63938863[C	1	0	59
SL4.0ch01	1134244	MantaBND:9656:2:4:2:2:0:1	SL4.0CH01	3939333	BND	G	G]SL4.0CH01:3939333]	0	0	60
SL4.0ch01	1193522	MantaBND:11426:0:2:0:0:0:1	SL4.0CH03	29103770	BND	T	T]SL4.0CH03:29103770]	1	0	59
SL4.0ch01	1209047	MantaBND:11227:0:1:0:0:0:0	SL4.0CH01	1105692	BND	C	[SL4.0CH01:1105692[C	1	0	59
SL4.0ch01	1756579	MantaBND:12575:0:1:0:0:0:0	SL4.0CH07	53669507	BND	T	]SL4.0CH07:53669507]T	1	0	59
SL4.0ch01	1869004	MantaBND:128:26099:26101:0:0:0:0	SL4.0CH02	40258973	BND	T	[SL4.0CH02:40258973[T	1	0	59
SL4.0ch01	1870032	MantaBND:13224:0:1:0:0:0:0	SL4.0CH09	10604985	BND	G	G[SL4.0CH09:10604985[	1	0	59
SL4.0ch01	1959738	MantaBND:128:5822:5823:0:0:0:1	SL4.0CH04	62057901	BND	A	A]SL4.0CH04:62057901]	1	0	59
SL4.0ch01	2147042	MantaBND:13979:0:1:0:0:0:1	SL4.0CH07	66855404	BND	C	CT[SL4.0CH07:66855404[	1	0	59
SL4.0ch01	2515303	MantaBND:14727:0:1:0:0:0:1	SL4.0CH11	2740115	BND	G	]SL4.0CH11:2740115]G	1	0	59
SL4.0ch01	2690036	MantaBND:15231:0:1:0:0:0:0	SL4.0CH12	63576985	BND	T	[SL4.0CH12:63576985[T	1	0	59
SL4.0ch01	3480679	MantaBND:17336:1:2:0:0:0:1	SL4.0CH11	36323151	BND	A	AT]SL4.0CH11:36323151]	1	0	59
SL4.0ch01	3490414	MantaBND:17186:0:1:0:0:0:1	SL4.0CH05	47597807	BND	C	]SL4.0CH05:47597807]C	2	0	58
SL4.0ch01	3528289	MantaBND:17546:0:1:0:0:0:0	SL4.0CH12	31095481	BND	A	]SL4.0CH12:31095481]A	1	0	59
SL4.0ch01	3939331	MantaBND:9656:2:4:2:2:0:0	SL4.0CH01	1134246	BND	A	A]SL4.0CH01:1134246]	0	0	60
SL4.0ch01	3949330	MantaBND:128:10814:10827:1:0:0:1	SL4.0CH01	19124386	BND	C	CTTTT]SL4.0CH01:19124386]	1	0	59
SL4.0ch01	4311469	MantaBND:128:28891:28892:0:0:0:1	SL4.0CH09	2722452	BND	A	[SL4.0CH09:2722452[A	0	1	59
SL4.0ch01	5258589	MantaBND:128:4284:4285:0:0:0:0	SL4.0CH10	12616777	BND	A	[SL4.0CH10:12616777[A	2	1	57
SL4.0ch01	5681753	MantaBND:21936:0:0:7:0:0:1	SL4.0CH01	5682226	BND	T	[SL4.0CH01:5682226[T	1	0	59
SL4.0ch01	5682226	MantaBND:21936:0:0:7:0:0:0	SL4.0CH01	5681753	BND	G	[SL4.0CH01:5681753[G	1	0	59
SL4.0ch01	5850414	MantaBND:22115:0:1:0:1:0:0	SL4.0CH06	34866175	BND	A	[SL4.0CH06:34866175[A	1	0	59
SL4.0ch01	7604639	MantaBND:17873:0:1:0:0:0:1	SL4.0CH05	18827719	BND	T	T]SL4.0CH05:18827719]	0	0	60
SL4.0ch01	8844982	MantaBND:27383:0:1:0:0:0:1	SL4.0CH08	52239920	BND	T	[SL4.0CH08:52239920[T	1	0	59
SL4.0ch01	9284797	MantaBND:128:9178:9179:0:0:0:0	SL4.0CH03	7147705	BND	C	C]SL4.0CH03:7147705]	1	0	59
SL4.0ch01	9290291	MantaBND:28351:0:1:0:0:0:1	SL4.0CH01	9357232	BND	A	A]SL4.0CH01:9357232]	1	0	59
SL4.0ch01	9314449	MantaBND:28553:0:1:0:0:0:1	SL4.0CH09	47829214	BND	T	T]SL4.0CH09:47829214]	1	0	59
SL4.0ch01	9357232	MantaBND:28351:0:1:0:0:0:0	SL4.0CH01	9290291	BND	C	C]SL4.0CH01:9290291]	1	0	59
SL4.0ch01	9368528	MantaBND:28830:0:1:0:0:0:0	SL4.0CH08	59040078	BND	C	[SL4.0CH08:59040078[C	1	0	59
SL4.0ch01	9584135	MantaBND:29109:0:1:0:0:0:0	SL4.0CH10	38005359	BND	T	[SL4.0CH10:38005359[T	1	0	59
SL4.0ch01	11028581	MantaBND:128:2014:2142:0:0:0:0	SL4.0CH10	7105568	BND	G	G[SL4.0CH10:7105568[	1	0	59
SL4.0ch01	11301792	MantaBND:128:8057:51529:0:0:0:1	SL4.0CH12	21449184	BND	C	[SL4.0CH12:21449184[C	2	0	58
SL4.0ch01	11965097	MantaBND:23299:0:1:0:8:0:1	SL4.0CH06	9764458	BND	G	G[SL4.0CH06:9764458[	0	0	60
SL4.0ch01	11997474	MantaBND:32212:0:2:0:0:0:1	SL4.0CH10	1744159	BND	A	A]SL4.0CH10:1744159]	1	0	59
SL4.0ch01	11998493	MantaBND:32258:0:1:0:0:0:1	SL4.0CH10	1743548	BND	A	[SL4.0CH10:1743548[AAGAA	2	0	58
SL4.0ch01	12688397	MantaBND:26:6311:6344:0:0:0:0	SL4.0CH08	31875260	BND	T	T[SL4.0CH08:31875260[	0	0	60
SL4.0ch01	14084659	MantaBND:128:11938:11939:0:0:0:1	SL4.0CH01	14086748	BND	A	A]SL4.0CH01:14086748]	1	0	59
SL4.0ch01	14084669	MantaBND:25818:0:1:0:0:0:1	SL4.0CH01	14086743	BND	T	T]SL4.0CH01:14086743]	0	0	60
SL4.0ch01	14086743	MantaBND:25818:0:1:0:0:0:0	SL4.0CH01	14084669	BND	A	A]SL4.0CH01:14084669]	0	0	60
SL4.0ch01	14086748	MantaBND:128:11938:11939:0:0:0:0	SL4.0CH01	14084659	BND	A	A]SL4.0CH01:14084659]	1	0	59
SL4.0ch01	14305296	MantaBND:36396:0:1:0:0:0:0	SL4.0CH04	10307983	BND	T	T]SL4.0CH04:10307983]	1	0	59
SL4.0ch01	14378830	MantaBND:128:3381:3449:0:0:0:1	SL4.0CH03	46054277	BND	G	]SL4.0CH03:46054277]G	1	0	59
SL4.0ch01	14476821	MantaBND:128:2690:2699:0:0:0:0	SL4.0CH10	56226265	BND	T	]SL4.0CH10:56226265]T	1	0	59
SL4.0ch01	16312516	MantaBND:128:6220:6226:0:0:0:1	SL4.0CH12	9192115	BND	T	]SL4.0CH12:9192115]T	2	0	58
SL4.0ch01	16342589	MantaBND:40817:0:2:0:0:0:1	SL4.0CH01	16363079	BND	C	[SL4.0CH01:16363079[C	1	0	59
SL4.0ch01	16347854	MantaBND:40804:0:1:0:0:0:1	SL4.0CH07	10703874	BND	G	]SL4.0CH07:10703874]G	2	0	58
SL4.0ch01	16363079	MantaBND:40817:0:2:0:0:0:0	SL4.0CH01	16342589	BND	T	[SL4.0CH01:16342589[T	1	0	59
SL4.0ch01	16374403	MantaBND:40813:0:1:0:0:0:1	SL4.0CH05	63231488	BND	T	TTTTTTTTTTAT[SL4.0CH05:63231488[	1	0	59
SL4.0ch01	18238026	MantaBND:43325:0:1:0:0:0:1	SL4.0CH01	18597717	BND	T	T]SL4.0CH01:18597717]	1	0	59
SL4.0ch01	18597717	MantaBND:43325:0:1:0:0:0:0	SL4.0CH01	18238026	BND	A	A]SL4.0CH01:18238026]	1	0	59
SL4.0ch01	19109709	MantaBND:44492:0:1:0:1:0:0	SL4.0CH11	1812114	BND	T	]SL4.0CH11:1812114]CTCTCT	1	0	59
SL4.0ch01	19124386	MantaBND:128:10814:10827:1:0:0:0	SL4.0CH01	3949330	BND	T	TAAAA]SL4.0CH01:3949330]	1	0	59
SL4.0ch01	19794888	MantaBND:30832:3:4:0:0:0:0	SL4.0CH06	26668232	BND	A	]SL4.0CH06:26668232]A	1	0	59
SL4.0ch01	20087159	MantaBND:46072:0:2:0:3:0:0	SL4.0CH09	8297109	BND	T	[SL4.0CH09:8297109[T	1	0	59
SL4.0ch01	20274837	MantaBND:46589:0:1:0:0:0:0	SL4.0CH03	30006507	BND	A	A[SL4.0CH03:30006507[	1	0	59
SL4.0ch01	21830386	MantaBND:19703:116:118:0:0:0:1	SL4.0CH10	46294343	BND	A	]SL4.0CH10:46294343]A	5	1	54
SL4.0ch01	22946296	MantaBND:50567:0:1:0:0:0:1	SL4.0CH04	50998959	BND	A	A[SL4.0CH04:50998959[	0	1	59
SL4.0ch01	23343024	MantaBND:51531:0:1:0:4:0:1	SL4.0CH01	24804199	BND	G	GC]SL4.0CH01:24804199]	1	0	59
SL4.0ch01	23697871	MantaBND:32161:5:7:0:0:0:0	SL4.0CH01	25357362	BND	A	[SL4.0CH01:25357362[A	1	0	59
SL4.0ch01	24095433	MantaBND:52808:0:1:0:2:0:0	SL4.0CH06	37638341	BND	A	A[SL4.0CH06:37638341[	0	1	59
SL4.0ch01	24095435	MantaBND:52808:0:2:0:1:0:0	SL4.0CH06	37641582	BND	A	]SL4.0CH06:37641582]A	1	0	59
SL4.0ch01	24173643	MantaBND:52961:0:1:0:3:0:0	SL4.0CH04	2864517	BND	C	]SL4.0CH04:2864517]CGC	1	0	59
SL4.0ch01	24354917	MantaBND:128:2102:2336:0:0:0:0	SL4.0CH04	24506183	BND	A	[SL4.0CH04:24506183[A	0	1	59
SL4.0ch01	24354993	MantaBND:128:2102:2328:0:0:0:1	SL4.0CH07	63164855	BND	A	A[SL4.0CH07:63164855[	1	0	59
SL4.0ch01	24804199	MantaBND:51531:0:1:0:4:0:0	SL4.0CH01	23343024	BND	T	TG]SL4.0CH01:23343024]	1	0	59
SL4.0ch01	25357362	MantaBND:32161:5:7:0:0:0:1	SL4.0CH01	23697871	BND	C	[SL4.0CH01:23697871[C	1	0	59
SL4.0ch01	25387596	MantaBND:55208:0:2:0:0:0:1	SL4.0CH01	25389657	BND	C	[SL4.0CH01:25389657[C	0	1	59
SL4.0ch01	25389657	MantaBND:55208:0:2:0:0:0:0	SL4.0CH01	25387596	BND	C	[SL4.0CH01:25387596[C	0	1	59
SL4.0ch01	25840596	MantaBND:56438:0:1:0:0:0:1	SL4.0CH01	66192609	BND	G	[SL4.0CH01:66192609[G	1	0	59
SL4.0ch01	25894071	MantaBND:56687:0:1:0:0:0:1	SL4.0CH05	6154792	BND	G	G]SL4.0CH05:6154792]	1	0	59
SL4.0ch01	26021578	MantaBND:56997:0:1:0:1:0:1	SL4.0CH03	10693132	BND	C	CCTT[SL4.0CH03:10693132[	1	0	59
SL4.0ch01	26517238	MantaBND:128:6311:6374:1:0:0:1	SL4.0CH07	14904453	BND	T	T]SL4.0CH07:14904453]	1	0	59
SL4.0ch01	26524931	MantaBND:128:5692:6666:0:0:0:0	SL4.0CH06	15875263	BND	T	]SL4.0CH06:15875263]T	1	0	59
SL4.0ch01	28185413	MantaBND:46050:0:1:0:0:0:1	SL4.0CH06	25410355	BND	G	G[SL4.0CH06:25410355[	0	0	60
SL4.0ch01	29474445	MantaBND:63657:0:1:0:2:0:0	SL4.0CH08	1469706	BND	A	[SL4.0CH08:1469706[TATTGCTGCCA	1	0	59
SL4.0ch01	30347205	MantaBND:51217:3:7:0:0:0:0	SL4.0CH03	6045948	BND	C	C]SL4.0CH03:6045948]	1	0	59
SL4.0ch01	30367058	MantaBND:51217:3:6:0:0:0:1	SL4.0CH03	6045669	BND	T	[SL4.0CH03:6045669[T	1	0	59
SL4.0ch01	30628012	MantaBND:66110:0:1:0:0:0:0	SL4.0CH03	29679153	BND	G	G[SL4.0CH03:29679153[	1	0	59
SL4.0ch01	30748489	MantaBND:66265:0:2:0:0:0:0	SL4.0CH12	49995882	BND	T	TCTCGTCTCTTCTTCCCTTGCATTACAAGAGAGTCACAAAGACTCATAC]SL4.0CH12:49995882]	2	0	58
SL4.0ch01	32371807	MantaBND:128:3990:3991:0:0:0:0	SL4.0CH12	12865279	BND	C	[SL4.0CH12:12865279[C	1	0	59
SL4.0ch01	32503874	MantaBND:128:9538:9542:0:0:0:1	SL4.0CH04	21926076	BND	A	A[SL4.0CH04:21926076[	1	0	59
SL4.0ch01	32869792	MantaBND:128:16348:38934:0:0:0:0	SL4.0CH11	10786664	BND	G	]SL4.0CH11:10786664]G	1	0	59
SL4.0ch01	33100077	MantaBND:70713:0:1:0:0:0:0	SL4.0CH01	33118281	BND	T	TGT]SL4.0CH01:33118281]	1	0	59
SL4.0ch01	33102416	MantaBND:70618:0:1:0:3:0:0	SL4.0CH01	33121052	BND	G	G]SL4.0CH01:33121052]	0	1	59
SL4.0ch01	33118281	MantaBND:70713:0:1:0:0:0:1	SL4.0CH01	33100077	BND	G	GAC]SL4.0CH01:33100077]	1	0	59
SL4.0ch01	33121050	MantaBND:70618:0:1:0:3:0:1	SL4.0CH01	33102418	BND	G	G]SL4.0CH01:33102418]	0	1	59
SL4.0ch01	33493727	MantaBND:128:469:680:0:3:0:1	SL4.0CH12	14670130	BND	G	]SL4.0CH12:14670130]G	1	0	59
SL4.0ch01	33595774	MantaBND:128:11667:11671:0:0:0:0	SL4.0CH12	21853969	BND	C	[SL4.0CH12:21853969[C	1	0	59
SL4.0ch01	33596127	MantaBND:128:11667:11671:1:0:0:0	SL4.0CH12	21854017	BND	A	A]SL4.0CH12:21854017]	2	0	58
SL4.0ch01	33627174	MantaBND:71930:0:1:0:0:0:1	SL4.0CH01	33628408	BND	A	A]SL4.0CH01:33628408]	1	0	59
SL4.0ch01	33627418	MantaBND:71930:0:1:1:0:0:0	SL4.0CH01	33628578	BND	A	[SL4.0CH01:33628578[A	0	2	58
SL4.0ch01	33628408	MantaBND:71930:0:1:0:0:0:0	SL4.0CH01	33627174	BND	G	G]SL4.0CH01:33627174]	1	0	59
SL4.0ch01	33628577	MantaBND:71930:0:1:1:0:0:1	SL4.0CH01	33627419	BND	T	[SL4.0CH01:33627419[T	0	2	58
SL4.0ch01	36335981	MantaBND:72055:1:3:0:0:0:1	SL4.0CH11	50228951	BND	A	]SL4.0CH11:50228951]AAAAAAAAAAAA	1	0	59
SL4.0ch01	36355628	MantaBND:128:22398:22399:0:0:0:1	SL4.0CH01	36666044	BND	C	CTGAGGAAACA]SL4.0CH01:36666044]	1	0	59
SL4.0ch01	36476237	MantaBND:76595:0:1:0:0:0:0	SL4.0CH01	36535708	BND	G	GG]SL4.0CH01:36535708]	2	0	58
SL4.0ch01	36535708	MantaBND:76595:0:1:0:0:0:1	SL4.0CH01	36476237	BND	T	TC]SL4.0CH01:36476237]	2	0	58
SL4.0ch01	36631115	MantaBND:128:22399:22401:0:0:0:1	SL4.0CH01	36666046	BND	C	[SL4.0CH01:36666046[C	2	0	58
SL4.0ch01	36666044	MantaBND:128:22398:22399:0:0:0:0	SL4.0CH01	36355628	BND	C	CTGTTTCCTCA]SL4.0CH01:36355628]	1	0	59
SL4.0ch01	36666045	MantaBND:128:22399:22401:0:0:0:0	SL4.0CH01	36631116	BND	G	[SL4.0CH01:36631116[G	2	0	58
SL4.0ch01	37099645	MantaBND:77919:0:1:0:0:0:1	SL4.0CH01	37100654	BND	T	T]SL4.0CH01:37100654]	1	0	59
SL4.0ch01	37100653	MantaBND:77919:0:1:0:0:0:0	SL4.0CH01	37099646	BND	T	T]SL4.0CH01:37099646]	1	0	59
SL4.0ch01	37170335	MantaBND:123:2817:2842:0:0:0:0	SL4.0CH08	51281648	BND	G	]SL4.0CH08:51281648]G	0	0	60
SL4.0ch01	37767521	MantaBND:79029:0:1:0:3:0:1	SL4.0CH01	37809222	BND	T	T]SL4.0CH01:37809222]	0	1	59
SL4.0ch01	37809221	MantaBND:79029:0:1:0:3:0:0	SL4.0CH01	37767522	BND	A	A]SL4.0CH01:37767522]	0	1	59
SL4.0ch01	37927386	MantaBND:79517:0:1:0:0:0:1	SL4.0CH05	43773084	BND	C	]SL4.0CH05:43773084]C	1	0	59
SL4.0ch01	38275672	MantaBND:128:8786:8787:0:0:0:0	SL4.0CH06	24346519	BND	C	[SL4.0CH06:24346519[C	1	0	59
SL4.0ch01	38505399	MantaBND:80434:0:1:0:0:0:0	SL4.0CH01	39865112	BND	T	T]SL4.0CH01:39865112]	2	0	58
SL4.0ch01	38711828	MantaBND:128:14145:14212:0:5:0:0	SL4.0CH03	47484243	BND	G	[SL4.0CH03:47484243[AGTCAATACAACTTTGTTGG	1	0	59
SL4.0ch01	39865111	MantaBND:80434:0:1:0:0:0:1	SL4.0CH01	38505400	BND	A	A]SL4.0CH01:38505400]	2	0	58
SL4.0ch01	42005839	MantaBND:86283:1:2:0:0:0:1	SL4.0CH03	60899122	BND	A	A]SL4.0CH03:60899122]	1	0	59
SL4.0ch01	42583431	MantaBND:87748:0:1:0:0:0:0	SL4.0CH01	42710980	BND	A	[SL4.0CH01:42710980[CTTA	0	1	59
SL4.0ch01	42710980	MantaBND:87748:0:1:0:0:0:1	SL4.0CH01	42583431	BND	C	[SL4.0CH01:42583431[AAGC	0	1	59
SL4.0ch01	42897312	MantaBND:88164:0:1:0:0:0:1	SL4.0CH01	42903942	BND	T	[SL4.0CH01:42903942[T	3	0	57
SL4.0ch01	42898654	MantaBND:88164:1:2:0:0:0:0	SL4.0CH01	42903842	BND	C	C]SL4.0CH01:42903842]	3	0	57
SL4.0ch01	42903842	MantaBND:88164:1:2:0:0:0:1	SL4.0CH01	42898654	BND	T	T]SL4.0CH01:42898654]	3	0	57
SL4.0ch01	42903942	MantaBND:88164:0:1:0:0:0:0	SL4.0CH01	42897312	BND	T	[SL4.0CH01:42897312[T	3	0	57
SL4.0ch01	43234732	MantaBND:88827:0:1:0:1:0:0	SL4.0CH01	43238891	BND	A	A]SL4.0CH01:43238891]	1	2	57
SL4.0ch01	43238887	MantaBND:88827:0:1:0:1:0:1	SL4.0CH01	43234736	BND	T	T]SL4.0CH01:43234736]	1	2	57
SL4.0ch01	43460691	MantaBND:89423:0:1:1:0:0:1	SL4.0CH01	43461189	BND	T	[SL4.0CH01:43461189[T	1	0	59
SL4.0ch01	43461186	MantaBND:89423:0:1:1:0:0:0	SL4.0CH01	43460694	BND	T	[SL4.0CH01:43460694[T	1	0	59
SL4.0ch01	43692398	MantaBND:90199:0:1:0:0:0:0	SL4.0CH04	32650426	BND	C	]SL4.0CH04:32650426]C	1	0	59
SL4.0ch01	44285178	MantaBND:35752:3:12:0:0:0:0	SL4.0CH10	42256546	BND	A	]SL4.0CH10:42256546]A	2	0	58
SL4.0ch01	44566165	MantaBND:91582:0:1:0:0:0:1	SL4.0CH03	29316720	BND	T	[SL4.0CH03:29316720[T	1	0	59
SL4.0ch01	45178232	MantaBND:92326:0:1:0:0:0:1	SL4.0CH01	45182498	BND	T	T]SL4.0CH01:45182498]	0	1	59
SL4.0ch01	45182497	MantaBND:92326:0:1:0:0:0:0	SL4.0CH01	45178233	BND	T	T]SL4.0CH01:45178233]	0	1	59
SL4.0ch01	48449874	MantaBND:98967:0:1:0:0:0:1	SL4.0CH01	48553891	BND	G	G]SL4.0CH01:48553891]	0	1	59
SL4.0ch01	48451249	MantaBND:98980:0:1:0:0:0:0	SL4.0CH01	48555656	BND	G	[SL4.0CH01:48555656[TGG	1	0	59
SL4.0ch01	48553890	MantaBND:98967:0:1:0:0:0:0	SL4.0CH01	48449875	BND	T	T]SL4.0CH01:48449875]	0	1	59
SL4.0ch01	48555656	MantaBND:98980:0:1:0:0:0:1	SL4.0CH01	48451249	BND	A	[SL4.0CH01:48451249[CAA	1	0	59
SL4.0ch01	49661149	MantaBND:101748:0:1:1:0:0:1	SL4.0CH12	10767590	BND	G	[SL4.0CH12:10767590[G	1	0	59
SL4.0ch01	49661291	MantaBND:101748:0:1:0:0:0:0	SL4.0CH12	10767894	BND	G	G]SL4.0CH12:10767894]	2	0	58
SL4.0ch01	49907240	MantaBND:102208:0:1:0:0:0:1	SL4.0CH04	33078161	BND	T	T[SL4.0CH04:33078161[	1	0	59
SL4.0ch01	50662202	MantaBND:104140:0:1:0:0:0:0	SL4.0CH01	80095129	BND	T	[SL4.0CH01:80095129[T	2	0	58
SL4.0ch01	51021277	MantaBND:105259:0:1:0:0:0:1	SL4.0CH06	17461845	BND	A	[SL4.0CH06:17461845[A	1	0	59
SL4.0ch01	51196590	MantaBND:128:2592:2622:0:0:0:1	SL4.0CH05	33469704	BND	G	G[SL4.0CH05:33469704[	1	0	59
SL4.0ch01	51197819	MantaBND:128:5963:7364:0:0:0:1	SL4.0CH11	37713124	BND	T	[SL4.0CH11:37713124[T	1	0	59
SL4.0ch01	51553629	MantaBND:128:7971:7972:1:1:0:0	SL4.0CH07	57512597	BND	T	]SL4.0CH07:57512597]T	1	0	59
SL4.0ch01	51559285	MantaBND:128:21812:21814:0:0:0:0	SL4.0CH08	9158941	BND	C	[SL4.0CH08:9158941[C	1	0	59
SL4.0ch01	51994897	MantaBND:107381:0:1:0:0:0:1	SL4.0CH10	49040437	BND	T	T]SL4.0CH10:49040437]	1	0	59
SL4.0ch01	52293817	MantaBND:128:3387:3482:0:0:0:0	SL4.0CH11	1458927	BND	A	]SL4.0CH11:1458927]A	1	0	59
SL4.0ch01	52315778	MantaBND:128:1929:2644:0:0:0:0	SL4.0CH07	44253723	BND	C	C[SL4.0CH07:44253723[	2	0	58
SL4.0ch01	52482367	MantaBND:108199:0:1:0:0:0:1	SL4.0CH03	57318075	BND	A	]SL4.0CH03:57318075]A	1	0	59
SL4.0ch01	52684592	MantaBND:128:35600:35602:0:1:0:1	SL4.0CH12	58421730	BND	A	]SL4.0CH12:58421730]CAA	1	0	59
SL4.0ch01	52688419	MantaBND:128:35588:35593:0:7:0:0	SL4.0CH02	36671719	BND	C	CACTGT]SL4.0CH02:36671719]	1	0	59
SL4.0ch01	52688495	MantaBND:128:35588:35589:0:0:0:1	SL4.0CH03	17803517	BND	T	T[SL4.0CH03:17803517[	1	0	59
SL4.0ch01	52688925	MantaBND:128:35588:35597:0:0:0:0	SL4.0CH12	58467246	BND	T	T[SL4.0CH12:58467246[	1	0	59
SL4.0ch01	52688937	MantaBND:128:35588:35599:0:0:0:0	SL4.0CH04	17930499	BND	T	TGCCACGGGCCTTCTCCATCTAG[SL4.0CH04:17930499[	1	0	59
SL4.0ch01	53075264	MantaBND:109422:0:1:0:0:0:1	SL4.0CH06	30700	BND	C	C]SL4.0CH06:30700]	0	1	59
SL4.0ch01	53774560	MantaBND:128:2547:2548:0:0:0:1	SL4.0CH04	28794100	BND	A	A[SL4.0CH04:28794100[	1	0	59
SL4.0ch01	54354738	MantaBND:112097:0:2:0:0:0:1	SL4.0CH01	54384825	BND	T	T]SL4.0CH01:54384825]	1	0	59
SL4.0ch01	54384825	MantaBND:112097:0:2:0:0:0:0	SL4.0CH01	54354738	BND	G	G]SL4.0CH01:54354738]	1	0	59
SL4.0ch01	54607913	MantaBND:128:54509:54510:0:0:0:0	SL4.0CH12	57124057	BND	A	A]SL4.0CH12:57124057]	1	0	59
SL4.0ch01	55905417	MantaBND:128:15288:15289:0:0:0:0	SL4.0CH03	50535617	BND	T	[SL4.0CH03:50535617[T	0	1	59
SL4.0ch01	56685156	MantaBND:116162:0:2:0:0:0:1	SL4.0CH08	19031361	BND	C	]SL4.0CH08:19031361]C	1	0	59
SL4.0ch01	57248318	MantaBND:117752:0:2:0:2:0:0	SL4.0CH07	17082191	BND	A	]SL4.0CH07:17082191]A	1	0	59
SL4.0ch01	57444434	MantaBND:118165:0:2:0:0:0:0	SL4.0CH04	55767892	BND	A	]SL4.0CH04:55767892]A	1	0	59
SL4.0ch01	57997020	MantaBND:119047:0:1:0:0:0:0	SL4.0CH08	57333168	BND	T	T[SL4.0CH08:57333168[	1	0	59
SL4.0ch01	58027605	MantaBND:119644:0:1:0:0:0:0	SL4.0CH01	58367219	BND	A	[SL4.0CH01:58367219[A	1	0	59
SL4.0ch01	58367218	MantaBND:119644:0:1:0:0:0:1	SL4.0CH01	58027606	BND	T	[SL4.0CH01:58027606[T	1	0	59
SL4.0ch01	58512935	MantaBND:120504:0:1:0:1:0:1	SL4.0CH04	22598083	BND	A	AT[SL4.0CH04:22598083[	0	2	58
SL4.0ch01	58772585	MantaBND:121284:0:2:0:5:0:0	SL4.0CH03	12099978	BND	A	]SL4.0CH03:12099978]GAGTAACAA	1	0	59
SL4.0ch01	59044453	MantaBND:128:12069:27915:0:0:0:0	SL4.0CH10	58079603	BND	T	[SL4.0CH10:58079603[T	1	0	59
SL4.0ch01	59044619	MantaBND:128:6095:27915:0:0:0:1	SL4.0CH10	55716297	BND	C	C[SL4.0CH10:55716297[	2	0	58
SL4.0ch01	59151930	MantaBND:121855:0:1:1:6:0:1	SL4.0CH01	59156069	BND	T	[SL4.0CH01:59156069[T	2	0	58
SL4.0ch01	59151953	MantaBND:121855:0:1:0:0:0:1	SL4.0CH01	59156082	BND	A	A]SL4.0CH01:59156082]	2	0	58
SL4.0ch01	59156069	MantaBND:121855:0:1:1:6:0:0	SL4.0CH01	59151930	BND	A	[SL4.0CH01:59151930[A	2	0	58
SL4.0ch01	59156082	MantaBND:121855:0:1:0:0:0:0	SL4.0CH01	59151953	BND	A	A]SL4.0CH01:59151953]	2	0	58
SL4.0ch01	60892364	MantaBND:124844:0:1:0:0:0:1	SL4.0CH10	10159902	BND	C	C[SL4.0CH10:10159902[	1	0	59
SL4.0ch01	61180282	MantaBND:63883:1:2:1:0:0:1	SL4.0CH05	61013542	BND	C	[SL4.0CH05:61013542[C	2	0	58
SL4.0ch01	61557483	MantaBND:128:1902:2859:0:0:0:0	SL4.0CH08	9949573	BND	A	]SL4.0CH08:9949573]A	1	0	59
SL4.0ch01	62724308	MantaBND:128358:0:1:0:0:0:1	SL4.0CH03	50468514	BND	C	[SL4.0CH03:50468514[C	1	0	59
SL4.0ch01	63114381	MantaBND:129275:0:1:0:0:0:1	SL4.0CH01	76270661	BND	A	A]SL4.0CH01:76270661]	1	0	59
SL4.0ch01	64048815	MantaBND:130216:0:1:0:0:0:0	SL4.0CH03	25524420	BND	T	T[SL4.0CH03:25524420[	1	0	59
SL4.0ch01	64635562	MantaBND:128:24067:24068:0:0:0:1	SL4.0CH07	59622095	BND	T	[SL4.0CH07:59622095[T	1	0	59
SL4.0ch01	64638411	MantaBND:128:24066:24067:0:0:0:1	SL4.0CH07	59622168	BND	A	A]SL4.0CH07:59622168]	1	0	59
SL4.0ch01	64880246	MantaBND:128:50920:50922:0:0:0:0	SL4.0CH08	47938133	BND	A	A[SL4.0CH08:47938133[	1	0	59
SL4.0ch01	65629521	MantaBND:128:13425:13613:0:1:0:1	SL4.0CH07	67454366	BND	A	]SL4.0CH07:67454366]AAAAAA	3	0	57
SL4.0ch01	65738912	MantaBND:133380:0:5:0:0:0:0	SL4.0CH06	8065124	BND	A	[SL4.0CH06:8065124[A	0	1	59
SL4.0ch01	65920207	MantaBND:133697:0:1:1:0:0:1	SL4.0CH05	53845344	BND	A	AATT[SL4.0CH05:53845344[	2	0	58
SL4.0ch01	66113305	MantaBND:128:21374:21378:0:0:0:0	SL4.0CH05	53153725	BND	T	[SL4.0CH05:53153725[T	1	0	59
SL4.0ch01	66192609	MantaBND:56438:0:1:0:0:0:0	SL4.0CH01	25840596	BND	T	[SL4.0CH01:25840596[T	1	0	59
SL4.0ch01	67007387	MantaBND:135654:0:1:0:5:0:0	SL4.0CH01	78862627	BND	A	A]SL4.0CH01:78862627]	1	0	59
SL4.0ch01	67320644	MantaBND:128:16280:16282:0:0:0:1	SL4.0CH09	20309266	BND	G	[SL4.0CH09:20309266[G	1	1	58
SL4.0ch01	67519204	MantaBND:128:23536:23538:0:4:0:1	SL4.0CH11	39678814	BND	T	TTTACTTTACTTTAC]SL4.0CH11:39678814]	0	1	59
SL4.0ch01	68118332	MantaBND:137619:0:1:0:0:0:0	SL4.0CH09	21871802	BND	T	T[SL4.0CH09:21871802[	1	0	59
SL4.0ch01	68346526	MantaBND:128:3065:3066:0:0:0:1	SL4.0CH10	46672910	BND	T	T]SL4.0CH10:46672910]	3	0	57
SL4.0ch01	68661968	MantaBND:128:7841:7843:0:0:0:1	SL4.0CH05	63418486	BND	T	]SL4.0CH05:63418486]T	1	0	59
SL4.0ch01	68941458	MantaBND:139259:0:1:0:0:0:0	SL4.0CH02	25903635	BND	A	[SL4.0CH02:25903635[A	2	0	58
SL4.0ch01	69142089	MantaBND:14650:1:2:0:0:0:0	SL4.0CH05	55806611	BND	A	[SL4.0CH05:55806611[A	1	0	59
SL4.0ch01	69362209	MantaBND:140388:0:1:0:0:0:0	SL4.0CH03	11361839	BND	A	]SL4.0CH03:11361839]A	1	0	59
SL4.0ch01	69476066	MantaBND:128:2936:2937:0:0:0:0	SL4.0CH05	23593369	BND	G	]SL4.0CH05:23593369]G	1	0	59
SL4.0ch01	69740834	MantaBND:128:35704:35705:0:0:0:0	SL4.0CH01	70240868	BND	C	[SL4.0CH01:70240868[C	1	0	59
SL4.0ch01	69761218	MantaBND:141260:0:0:6:2:0:0	SL4.0CH01	69761474	BND	C	[SL4.0CH01:69761474[AC	1	0	59
SL4.0ch01	69761219	MantaBND:141260:0:0:5:0:0:1	SL4.0CH01	69761473	BND	A	A]SL4.0CH01:69761473]	2	0	58
SL4.0ch01	69761471	MantaBND:141260:0:0:5:0:0:0	SL4.0CH01	69761221	BND	A	A]SL4.0CH01:69761221]	2	0	58
SL4.0ch01	69761474	MantaBND:141260:0:0:6:2:0:1	SL4.0CH01	69761218	BND	G	[SL4.0CH01:69761218[TG	1	0	59
SL4.0ch01	70240864	MantaBND:128:35704:35705:0:0:0:1	SL4.0CH01	69740838	BND	A	[SL4.0CH01:69740838[A	1	0	59
SL4.0ch01	70384896	MantaBND:142508:0:1:0:0:0:0	SL4.0CH01	70386920	BND	A	[SL4.0CH01:70386920[A	1	0	59
SL4.0ch01	70386920	MantaBND:142508:0:1:0:0:0:1	SL4.0CH01	70384896	BND	A	[SL4.0CH01:70384896[A	1	0	59
SL4.0ch01	70580670	MantaBND:143204:0:1:0:0:0:0	SL4.0CH02	7618592	BND	C	[SL4.0CH02:7618592[C	1	0	59
SL4.0ch01	70754364	MantaBND:143531:0:1:0:0:0:0	SL4.0CH11	19003011	BND	A	A]SL4.0CH11:19003011]	1	0	59
SL4.0ch01	70831338	MantaBND:128:36936:36939:0:0:0:1	SL4.0CH08	42748361	BND	A	A]SL4.0CH08:42748361]	1	0	59
SL4.0ch01	70861035	MantaBND:128:36100:36101:0:0:0:0	SL4.0CH03	62453206	BND	C	]SL4.0CH03:62453206]C	1	0	59
SL4.0ch01	71106663	MantaBND:144215:0:1:0:0:0:1	SL4.0CH05	1403894	BND	T	[SL4.0CH05:1403894[T	1	1	58
SL4.0ch01	72333784	MantaBND:146819:0:1:0:0:0:0	SL4.0CH06	39209476	BND	A	[SL4.0CH06:39209476[A	1	0	59
SL4.0ch01	72367127	MantaBND:128:36078:36079:0:0:0:1	SL4.0CH05	20180521	BND	C	C[SL4.0CH05:20180521[	1	0	59
SL4.0ch01	72649749	MantaBND:124360:1:5:0:1:0:1	SL4.0CH07	61872931	BND	T	]SL4.0CH07:61872931]ATCTTCT	1	0	59
SL4.0ch01	72808853	MantaBND:147975:0:1:0:0:0:0	SL4.0CH10	56146559	BND	T	T[SL4.0CH10:56146559[	1	0	59
SL4.0ch01	72922298	MantaBND:148089:0:1:0:1:0:1	SL4.0CH01	73050095	BND	A	[SL4.0CH01:73050095[A	1	0	59
SL4.0ch01	73050091	MantaBND:148089:0:1:0:1:0:0	SL4.0CH01	72922302	BND	A	[SL4.0CH01:72922302[A	1	0	59
SL4.0ch01	73119050	MantaBND:148400:0:1:0:0:0:0	SL4.0CH12	5837143	BND	A	A[SL4.0CH12:5837143[	1	0	59
SL4.0ch01	73130058	MantaBND:128:24133:24134:0:2:0:0	SL4.0CH06	47121396	BND	A	]SL4.0CH06:47121396]ACA	1	0	59
SL4.0ch01	73363688	MantaBND:148912:0:1:0:0:0:0	SL4.0CH05	64408652	BND	T	[SL4.0CH05:64408652[T	1	0	59
SL4.0ch01	73364101	MantaBND:148912:0:6:0:0:0:0	SL4.0CH10	60727686	BND	C	CAC]SL4.0CH10:60727686]	1	0	59
SL4.0ch01	73364293	MantaBND:148912:0:8:0:2:0:1	SL4.0CH07	67732484	BND	T	TTCTTTGCAATATCCACAGTTCAACATTGTATATGTGAAAATA[SL4.0CH07:67732484[	1	0	59
SL4.0ch01	74171285	MantaBND:150729:0:1:1:3:0:1	SL4.0CH03	7146581	BND	A	A[SL4.0CH03:7146581[	2	0	58
SL4.0ch01	74228638	MantaBND:128:2306:3153:0:0:0:1	SL4.0CH03	23311065	BND	C	[SL4.0CH03:23311065[C	1	0	59
SL4.0ch01	74336778	MantaBND:150904:0:1:0:0:0:0	SL4.0CH06	2270049	BND	T	]SL4.0CH06:2270049]T	1	0	59
SL4.0ch01	74337249	MantaBND:150904:0:1:1:1:0:1	SL4.0CH06	2270260	BND	T	TAG[SL4.0CH06:2270260[	1	0	59
SL4.0ch01	74557823	MantaBND:151362:0:1:0:0:0:1	SL4.0CH04	62094583	BND	A	]SL4.0CH04:62094583]A	1	0	59
SL4.0ch01	74735071	MantaBND:151900:0:1:0:0:0:1	SL4.0CH09	5226346	BND	T	]SL4.0CH09:5226346]T	1	0	59
SL4.0ch01	74793973	MantaBND:152157:0:1:0:0:0:1	SL4.0CH07	55233744	BND	T	T]SL4.0CH07:55233744]	1	0	59
SL4.0ch01	74823213	MantaBND:152047:0:2:0:0:0:0	SL4.0CH03	47199359	BND	A	[SL4.0CH03:47199359[A	1	0	59
SL4.0ch01	74928103	MantaBND:152419:0:1:0:0:0:0	SL4.0CH03	51595595	BND	C	[SL4.0CH03:51595595[ATTTATGAATGTCTCGTTTATC	1	0	59
SL4.0ch01	75174409	MantaBND:128:14163:14164:0:0:0:0	SL4.0CH02	44386053	BND	G	G]SL4.0CH02:44386053]	1	0	59
SL4.0ch01	75823101	MantaBND:154327:0:0:1:1:0:0	SL4.0CH01	75823249	BND	T	T]SL4.0CH01:75823249]	0	1	59
SL4.0ch01	75823246	MantaBND:154327:0:0:1:1:0:1	SL4.0CH01	75823104	BND	C	C]SL4.0CH01:75823104]	0	1	59
SL4.0ch01	76270661	MantaBND:129275:0:1:0:0:0:0	SL4.0CH01	63114381	BND	T	T]SL4.0CH01:63114381]	1	0	59
SL4.0ch01	77097442	MantaBND:128:7849:7855:0:0:0:0	SL4.0CH04	2524645	BND	A	]SL4.0CH04:2524645]A	1	0	59
SL4.0ch01	77269136	MantaBND:157824:0:1:0:0:0:1	SL4.0CH11	34259499	BND	T	]SL4.0CH11:34259499]T	1	0	59
SL4.0ch01	78151692	MantaBND:159883:1:2:0:1:0:0	SL4.0CH08	53607555	BND	C	CCC[SL4.0CH08:53607555[	0	1	59
SL4.0ch01	78197441	MantaBND:160206:0:2:0:0:0:1	SL4.0CH09	67433760	BND	A	[SL4.0CH09:67433760[A	2	0	58
SL4.0ch01	78197746	MantaBND:160206:0:1:0:0:0:1	SL4.0CH09	67438435	BND	G	GAAAAT]SL4.0CH09:67438435]	2	1	57
SL4.0ch01	78638758	MantaBND:28839:8:9:0:0:0:1	SL4.0CH01	79864396	BND	T	[SL4.0CH01:79864396[T	1	0	59
SL4.0ch01	78687516	MantaBND:161501:0:1:0:0:0:0	SL4.0CH10	4066744	BND	T	[SL4.0CH10:4066744[T	1	0	59
SL4.0ch01	78862627	MantaBND:135654:0:1:0:5:0:1	SL4.0CH01	67007387	BND	T	T]SL4.0CH01:67007387]	1	0	59
SL4.0ch01	79255956	MantaBND:162557:0:1:1:0:0:0	SL4.0CH03	56106372	BND	A	]SL4.0CH03:56106372]A	1	0	59
SL4.0ch01	79356192	MantaBND:128:42855:42856:1:0:0:1	SL4.0CH06	32203284	BND	A	[SL4.0CH06:32203284[A	1	0	59
SL4.0ch01	79402024	MantaBND:128:14135:14145:0:0:0:1	SL4.0CH03	47484437	BND	T	]SL4.0CH03:47484437]T	2	0	58
SL4.0ch01	79402047	MantaBND:128:14135:14144:0:0:0:0	SL4.0CH10	5161604	BND	A	[SL4.0CH10:5161604[A	1	0	59
SL4.0ch01	79402296	MantaBND:128:14135:14142:0:0:0:0	SL4.0CH06	3707716	BND	C	C]SL4.0CH06:3707716]	2	0	58
SL4.0ch01	79509052	MantaBND:128:48790:48791:0:0:0:0	SL4.0CH03	4247457	BND	A	]SL4.0CH03:4247457]TCTTCTA	0	1	59
SL4.0ch01	79568103	MantaBND:163285:0:1:0:1:0:0	SL4.0CH06	42291153	BND	C	C]SL4.0CH06:42291153]	1	0	59
SL4.0ch01	79864394	MantaBND:28839:8:9:0:0:0:0	SL4.0CH01	78638760	BND	A	[SL4.0CH01:78638760[A	1	0	59
SL4.0ch01	79915911	MantaBND:164017:1:1:7:1:0:1	SL4.0CH01	79916056	BND	T	[SL4.0CH01:79916056[GGTTACTTTTTAGTCTTT	1	0	59
SL4.0ch01	79916056	MantaBND:164017:1:1:7:1:0:0	SL4.0CH01	79915911	BND	T	[SL4.0CH01:79915911[AAGACTAAAAAGTAACCT	1	0	59
SL4.0ch01	80074572	MantaBND:27422:2:6:0:0:0:0	SL4.0CH08	60532959	BND	C	CTG]SL4.0CH08:60532959]	1	0	59
SL4.0ch01	80095129	MantaBND:104140:0:1:0:0:0:1	SL4.0CH01	50662202	BND	C	[SL4.0CH01:50662202[C	2	0	58
SL4.0ch01	80135669	MantaBND:164750:0:1:0:0:0:0	SL4.0CH04	50085924	BND	C	C[SL4.0CH04:50085924[	1	0	59
SL4.0ch01	80194689	MantaBND:164598:0:1:0:7:0:1	SL4.0CH05	2833556	BND	A	]SL4.0CH05:2833556]AGGTTAATGTCAAAACCAATTTTTCATACTTGAAAA	3	0	57
SL4.0ch01	80255762	MantaBND:164785:2:3:0:0:0:0	SL4.0CH11	40215583	BND	A	]SL4.0CH11:40215583]ACA	1	0	59
SL4.0ch01	80258146	MantaBND:164785:0:2:0:0:0:1	SL4.0CH11	40215630	BND	T	]SL4.0CH11:40215630]T	1	0	59
SL4.0ch01	80364317	MantaBND:147795:1:3:0:7:0:0	SL4.0CH02	36075829	BND	C	C[SL4.0CH02:36075829[	2	0	58
SL4.0ch01	80405582	MantaBND:165011:1:2:0:0:0:1	SL4.0CH01	80431391	BND	T	T]SL4.0CH01:80431391]	3	0	57
SL4.0ch01	80431388	MantaBND:165011:1:2:0:0:0:0	SL4.0CH01	80405585	BND	C	C]SL4.0CH01:80405585]	3	0	57
SL4.0ch01	80809524	MantaBND:143:4343:4344:0:0:0:1	SL4.0CH12	26415794	BND	T	T[SL4.0CH12:26415794[	0	0	60
SL4.0ch01	80831642	MantaBND:128:54387:54429:0:1:0:1	SL4.0CH12	62584389	BND	G	]SL4.0CH12:62584389]AAG	2	0	58
SL4.0ch01	80924928	MantaBND:166267:0:1:0:0:0:0	SL4.0CH07	16482323	BND	T	]SL4.0CH07:16482323]T	1	0	59
SL4.0ch01	82397729	MantaBND:128:49285:49290:0:1:0:1	SL4.0CH05	3127085	BND	G	]SL4.0CH05:3127085]G	0	1	59
SL4.0ch01	82877651	MantaBND:128:4794:4812:1:0:0:0	SL4.0CH02	44299808	BND	T	]SL4.0CH02:44299808]T	1	0	59
SL4.0ch01	82991783	MantaBND:171373:0:1:0:0:0:0	SL4.0CH03	28488087	BND	A	[SL4.0CH03:28488087[A	1	0	59
SL4.0ch01	83276510	MantaBND:171938:1:2:0:0:0:1	SL4.0CH10	12839254	BND	G	[SL4.0CH10:12839254[GG	1	0	59
SL4.0ch01	83278018	MantaBND:171938:0:1:0:2:0:0	SL4.0CH10	12839265	BND	T	TAAAAAAAAATAAAAAAA]SL4.0CH10:12839265]	1	0	59
SL4.0ch01	83674358	MantaBND:172977:1:3:0:0:0:0	SL4.0CH08	49577102	BND	G	G]SL4.0CH08:49577102]	1	0	59
SL4.0ch01	83713951	MantaBND:173120:0:1:0:0:0:0	SL4.0CH05	31753670	BND	A	]SL4.0CH05:31753670]AA	2	0	58
SL4.0ch01	83961189	MantaBND:173682:0:1:0:0:0:1	SL4.0CH06	45337426	BND	T	T]SL4.0CH06:45337426]	1	0	59
SL4.0ch01	84190378	MantaBND:128:11727:11779:0:1:0:0	SL4.0CH10	62783436	BND	T	]SL4.0CH10:62783436]AT	1	1	58
SL4.0ch01	85239259	MantaBND:176398:0:1:0:0:0:0	SL4.0CH10	46139735	BND	G	]SL4.0CH10:46139735]G	1	0	59
SL4.0ch01	85712253	MantaBND:39996:1:3:0:0:0:1	SL4.0CH10	7606534	BND	A	[SL4.0CH10:7606534[A	1	0	59
SL4.0ch01	85712588	MantaBND:39996:3:4:0:0:0:1	SL4.0CH09	63466500	BND	G	G]SL4.0CH09:63466500]	1	0	59
SL4.0ch01	85856675	MantaBND:178017:0:1:0:1:0:1	SL4.0CH08	7398588	BND	A	]SL4.0CH08:7398588]A	1	0	59
SL4.0ch01	86062683	MantaBND:148912:9:10:0:1:0:0	SL4.0CH05	5029037	BND	G	]SL4.0CH05:5029037]TATCAAGTG	1	0	59
SL4.0ch01	86063238	MantaBND:148912:8:10:0:0:0:0	SL4.0CH07	67732578	BND	A	AC[SL4.0CH07:67732578[	1	0	59
SL4.0ch01	86716805	MantaBND:179558:0:1:0:0:0:1	SL4.0CH01	86896668	BND	T	T]SL4.0CH01:86896668]	1	0	59
SL4.0ch01	86896667	MantaBND:179558:0:1:0:0:0:0	SL4.0CH01	86716806	BND	T	T]SL4.0CH01:86716806]	1	0	59
SL4.0ch01	86908848	MantaBND:180250:0:0:7:1:0:1	SL4.0CH01	86908981	BND	A	[SL4.0CH01:86908981[A	1	0	59
SL4.0ch01	86908960	MantaBND:180250:0:4:0:0:0:0	SL4.0CH10	37913623	BND	T	[SL4.0CH10:37913623[T	1	0	59
SL4.0ch01	86908981	MantaBND:180250:0:0:7:1:0:0	SL4.0CH01	86908848	BND	G	[SL4.0CH01:86908848[G	1	0	59
SL4.0ch01	86909418	MantaBND:180250:4:5:0:0:0:1	SL4.0CH10	37913698	BND	A	A]SL4.0CH10:37913698]	1	0	59
SL4.0ch01	86977893	MantaBND:180403:0:1:0:0:0:0	SL4.0CH01	87794170	BND	A	[SL4.0CH01:87794170[A	1	0	59
SL4.0ch01	87772918	MantaBND:182382:0:1:0:0:0:1	SL4.0CH04	62905710	BND	T	[SL4.0CH04:62905710[T	1	0	59
SL4.0ch01	87794170	MantaBND:180403:0:1:0:0:0:1	SL4.0CH01	86977893	BND	G	[SL4.0CH01:86977893[G	1	0	59
SL4.0ch01	88238628	MantaBND:128:3318:3319:0:0:0:0	SL4.0CH02	30587116	BND	T	T]SL4.0CH02:30587116]	1	0	59
SL4.0ch01	88240616	MantaBND:128:10974:10976:0:0:0:0	SL4.0CH10	42921305	BND	A	A]SL4.0CH10:42921305]	2	0	58
SL4.0ch01	88898718	MantaBND:128:36619:36632:0:0:0:1	SL4.0CH06	36211657	BND	T	T]SL4.0CH06:36211657]	1	0	59
SL4.0ch01	88946560	MantaBND:184894:0:2:0:0:0:0	SL4.0CH10	22888980	BND	G	G]SL4.0CH10:22888980]	1	0	59
SL4.0ch01	89064012	MantaBND:185027:0:1:0:0:0:0	SL4.0CH09	47225449	BND	A	[SL4.0CH09:47225449[A	0	2	58
SL4.0ch01	89512934	MantaBND:128:7513:7514:0:0:0:0	SL4.0CH03	8809371	BND	A	A[SL4.0CH03:8809371[	1	0	59
SL4.0ch01	89698221	MantaBND:186735:0:1:0:1:0:1	SL4.0CH12	57623763	BND	T	T]SL4.0CH12:57623763]	0	1	59
SL4.0ch01	89806857	MantaBND:128:24628:24634:0:0:0:0	SL4.0CH06	2757815	BND	A	[SL4.0CH06:2757815[A	3	0	57
SL4.0ch01	89898086	MantaBND:187218:0:1:0:0:0:0	SL4.0CH09	60116956	BND	A	]SL4.0CH09:60116956]A	1	0	59
SL4.0ch01	89898524	MantaBND:187218:2:3:0:0:0:1	SL4.0CH09	57924212	BND	A	ACTTCTATGTAGTAGGCTCTGCCTCTACTACTTAGGGTGTCTCGTT]SL4.0CH09:57924212]	1	0	59
SL4.0ch01	90283038	MantaBND:188101:0:1:0:0:0:0	SL4.0CH12	65989763	BND	C	C]SL4.0CH12:65989763]	1	0	59
SL4.0ch01	90756574	MantaBND:128:20598:20600:0:7:0:1	SL4.0CH07	57460532	BND	A	AATATACAAAAGAAATCGGAAAACAATGGGTGCTCGAGCTCCCGCGTCTGGCTTACTTGGTCCGCCCCTG]SL4.0CH07:57460532]	1	0	59
SL4.0ch02	166498	MantaBND:147235:2:10:0:1:0:0	SL4.0CH09	66597457	BND	C	CT[SL4.0CH09:66597457[	1	2	57
SL4.0ch02	351389	MantaBND:189793:1:2:0:0:0:0	SL4.0CH11	43012847	BND	A	]SL4.0CH11:43012847]A	1	0	59
SL4.0ch02	2757672	MantaBND:194642:0:1:0:1:0:0	SL4.0CH02	2763068	BND	C	C]SL4.0CH02:2763068]	1	0	59
SL4.0ch02	2763065	MantaBND:194642:0:1:0:1:0:1	SL4.0CH02	2757675	BND	T	T]SL4.0CH02:2757675]	1	0	59
SL4.0ch02	3690284	MantaBND:128:31813:31814:1:0:0:1	SL4.0CH02	3699773	BND	A	[SL4.0CH02:3699773[A	1	0	59
SL4.0ch02	3699771	MantaBND:128:31813:31814:1:0:0:0	SL4.0CH02	3690286	BND	T	[SL4.0CH02:3690286[T	1	0	59
SL4.0ch02	5467584	MantaBND:123:7640:7643:0:0:0:1	SL4.0CH06	5239943	BND	A	A]SL4.0CH06:5239943]	0	0	60
SL4.0ch02	5515217	MantaBND:128:47190:47191:1:3:0:1	SL4.0CH02	5516009	BND	A	[SL4.0CH02:5516009[A	1	0	59
SL4.0ch02	5516006	MantaBND:128:47190:47191:1:3:0:0	SL4.0CH02	5515220	BND	C	[SL4.0CH02:5515220[C	1	0	59
SL4.0ch02	5897773	MantaBND:200808:0:1:0:0:0:1	SL4.0CH05	64337200	BND	C	C]SL4.0CH05:64337200]	1	0	59
SL4.0ch02	6016099	MantaBND:200938:0:1:0:0:0:1	SL4.0CH02	6390675	BND	A	A]SL4.0CH02:6390675]	1	0	59
SL4.0ch02	6016144	MantaBND:200938:0:1:1:0:0:0	SL4.0CH02	6390655	BND	T	[SL4.0CH02:6390655[T	1	0	59
SL4.0ch02	6055910	MantaBND:201037:0:1:0:1:0:0	SL4.0CH02	6082802	BND	A	AC]SL4.0CH02:6082802]	1	0	59
SL4.0ch02	6082802	MantaBND:201037:0:1:0:1:0:1	SL4.0CH02	6055910	BND	T	TG]SL4.0CH02:6055910]	1	0	59
SL4.0ch02	6353565	MantaBND:105357:0:1:1:0:0:1	SL4.0CH11	35060137	BND	A	[SL4.0CH11:35060137[A	0	0	60
SL4.0ch02	6390654	MantaBND:200938:0:1:1:0:0:1	SL4.0CH02	6016145	BND	A	[SL4.0CH02:6016145[A	1	0	59
SL4.0ch02	6390675	MantaBND:200938:0:1:0:0:0:0	SL4.0CH02	6016099	BND	A	A]SL4.0CH02:6016099]	1	0	59
SL4.0ch02	6475861	MantaBND:201818:1:2:0:5:0:0	SL4.0CH07	12149986	BND	A	[SL4.0CH07:12149986[GCAA	1	0	59
SL4.0ch02	7618592	MantaBND:143204:0:1:0:0:0:1	SL4.0CH01	70580670	BND	A	[SL4.0CH01:70580670[A	1	0	59
SL4.0ch02	7630762	MantaBND:128:8436:8445:0:0:0:1	SL4.0CH12	25314659	BND	A	[SL4.0CH12:25314659[A	1	0	59
SL4.0ch02	7630883	MantaBND:128:8436:8444:0:0:0:0	SL4.0CH02	7631520	BND	C	C]SL4.0CH02:7631520]	0	1	59
SL4.0ch02	7631519	MantaBND:128:8436:8444:0:0:0:1	SL4.0CH02	7630884	BND	T	T]SL4.0CH02:7630884]	0	1	59
SL4.0ch02	7746717	MantaBND:133380:13:15:0:0:0:0	SL4.0CH12	40673419	BND	G	[SL4.0CH12:40673419[G	1	0	59
SL4.0ch02	9172400	MantaBND:128:26107:26109:1:2:0:1	SL4.0CH06	36391103	BND	T	]SL4.0CH06:36391103]T	1	0	59
SL4.0ch02	9173455	MantaBND:128:26122:26124:0:0:0:1	SL4.0CH09	66110736	BND	T	T[SL4.0CH09:66110736[	1	0	59
SL4.0ch02	9173824	MantaBND:128:26112:26122:1:5:0:1	SL4.0CH11	49382898	BND	C	[SL4.0CH11:49382898[GC	1	0	59
SL4.0ch02	9258146	MantaBND:6244:0:1:0:0:0:0	SL4.0CH00	8300006	BND	T	]SL4.0CH00:8300006]CGT	1	0	59
SL4.0ch02	9402945	MantaBND:128:1315:1316:0:0:0:0	SL4.0CH00	6085536	BND	C	]SL4.0CH00:6085536]C	1	0	59
SL4.0ch02	9449758	MantaBND:128:2012:2557:0:0:0:1	SL4.0CH09	17386870	BND	C	C[SL4.0CH09:17386870[	1	1	58
SL4.0ch02	10092154	MantaBND:209213:0:1:0:0:0:1	SL4.0CH12	28900827	BND	A	A]SL4.0CH12:28900827]	1	0	59
SL4.0ch02	10859921	MantaBND:128:6794:6795:0:0:0:0	SL4.0CH05	61945948	BND	C	C[SL4.0CH05:61945948[	1	0	59
SL4.0ch02	11470792	MantaBND:148857:2:2:13:0:0:1	SL4.0CH02	11471272	BND	A	[SL4.0CH02:11471272[A	0	1	59
SL4.0ch02	11471271	MantaBND:148857:2:2:13:0:0:0	SL4.0CH02	11470793	BND	T	[SL4.0CH02:11470793[T	0	1	59
SL4.0ch02	11863002	MantaBND:128:12868:18238:0:3:0:0	SL4.0CH05	5991004	BND	T	]SL4.0CH05:5991004]TGAT	1	0	59
SL4.0ch02	12416227	MantaBND:128:9904:9915:0:0:0:0	SL4.0CH02	33825965	BND	A	A]SL4.0CH02:33825965]	1	0	59
SL4.0ch02	12416227	MantaBND:128:9904:9914:0:0:0:1	SL4.0CH04	59042004	BND	A	A[SL4.0CH04:59042004[	0	0	60
SL4.0ch02	12756659	MantaBND:213426:0:1:0:0:0:0	SL4.0CH02	20425890	BND	T	T]SL4.0CH02:20425890]	0	1	59
SL4.0ch02	13922497	MantaBND:214980:0:1:0:0:0:0	SL4.0CH03	2088275	BND	C	[SL4.0CH03:2088275[C	1	0	59
SL4.0ch02	14865330	MantaBND:128:17894:17899:0:0:0:0	SL4.0CH08	33190094	BND	C	C[SL4.0CH08:33190094[	1	0	59
SL4.0ch02	15692082	MantaBND:218518:0:1:0:0:0:1	SL4.0CH06	28968463	BND	A	A]SL4.0CH06:28968463]	0	1	59
SL4.0ch02	16522247	MantaBND:128:3660:3672:0:0:0:0	SL4.0CH08	20428149	BND	T	T]SL4.0CH08:20428149]	1	0	59
SL4.0ch02	16525930	MantaBND:128:3663:3664:0:0:0:0	SL4.0CH06	14959281	BND	A	A[SL4.0CH06:14959281[	1	0	59
SL4.0ch02	17550626	MantaBND:222673:0:1:0:0:0:1	SL4.0CH06	36968797	BND	G	G[SL4.0CH06:36968797[	3	0	57
SL4.0ch02	18616685	MantaBND:224049:1:2:1:0:0:1	SL4.0CH02	18624192	BND	A	A]SL4.0CH02:18624192]	0	1	59
SL4.0ch02	18624190	MantaBND:224049:1:2:1:0:0:0	SL4.0CH02	18616687	BND	C	C]SL4.0CH02:18616687]	0	1	59
SL4.0ch02	19666681	MantaBND:226221:0:1:0:0:0:0	SL4.0CH05	51025160	BND	A	A]SL4.0CH05:51025160]	1	0	59
SL4.0ch02	19732807	MantaBND:128:36181:36182:0:0:0:0	SL4.0CH09	50266950	BND	C	]SL4.0CH09:50266950]C	1	0	59
SL4.0ch02	20425888	MantaBND:213426:0:1:0:0:0:1	SL4.0CH02	12756661	BND	G	G]SL4.0CH02:12756661]	0	1	59
SL4.0ch02	20765185	MantaBND:228512:0:1:0:0:0:1	SL4.0CH04	28952148	BND	T	[SL4.0CH04:28952148[T	1	0	59
SL4.0ch02	21021266	MantaBND:128:9556:9567:0:0:0:1	SL4.0CH11	48177481	BND	G	[SL4.0CH11:48177481[G	1	0	59
SL4.0ch02	21337898	MantaBND:229695:0:1:0:0:0:0	SL4.0CH02	21394846	BND	A	[SL4.0CH02:21394846[A	1	0	59
SL4.0ch02	21338008	MantaBND:229695:0:2:0:0:0:0	SL4.0CH02	21395408	BND	A	AAT]SL4.0CH02:21395408]	1	0	59
SL4.0ch02	21349440	MantaBND:128:16796:16826:0:2:0:1	SL4.0CH08	14213361	BND	T	[SL4.0CH08:14213361[T	1	0	59
SL4.0ch02	21394843	MantaBND:229695:0:1:0:0:0:1	SL4.0CH02	21337901	BND	T	[SL4.0CH02:21337901[T	1	0	59
SL4.0ch02	21395408	MantaBND:229695:0:2:0:0:0:1	SL4.0CH02	21338008	BND	A	AAT]SL4.0CH02:21338008]	1	0	59
SL4.0ch02	21532309	MantaBND:230068:0:1:0:0:0:0	SL4.0CH11	12972640	BND	T	[SL4.0CH11:12972640[T	1	0	59
SL4.0ch02	22090385	MantaBND:230954:0:1:0:0:0:1	SL4.0CH02	22548233	BND	A	A]SL4.0CH02:22548233]	1	0	59
SL4.0ch02	22371251	MantaBND:128:1926:2630:0:0:0:0	SL4.0CH07	1448500	BND	C	]SL4.0CH07:1448500]C	1	0	59
SL4.0ch02	22467897	MantaBND:128:16344:16349:0:0:0:0	SL4.0CH06	16253683	BND	A	A[SL4.0CH06:16253683[	1	0	59
SL4.0ch02	22467938	MantaBND:128:16345:16349:0:0:0:0	SL4.0CH06	40560388	BND	A	A]SL4.0CH06:40560388]	1	2	57
SL4.0ch02	22548232	MantaBND:230954:0:1:0:0:0:0	SL4.0CH02	22090386	BND	T	T]SL4.0CH02:22090386]	1	0	59
SL4.0ch02	22681709	MantaBND:232123:0:0:9:0:0:1	SL4.0CH02	22682134	BND	C	C]SL4.0CH02:22682134]	1	1	58
SL4.0ch02	22681731	MantaBND:232123:0:0:13:0:0:0	SL4.0CH02	22682186	BND	C	[SL4.0CH02:22682186[C	0	1	59
SL4.0ch02	22682134	MantaBND:232123:0:0:9:0:0:0	SL4.0CH02	22681709	BND	A	A]SL4.0CH02:22681709]	1	1	58
SL4.0ch02	22682182	MantaBND:232123:0:0:13:0:0:1	SL4.0CH02	22681735	BND	T	[SL4.0CH02:22681735[T	0	1	59
SL4.0ch02	23161400	MantaBND:233149:0:3:0:0:0:0	SL4.0CH11	35276874	BND	T	T]SL4.0CH11:35276874]	0	1	59
SL4.0ch02	23634300	MantaBND:162:5993:5994:0:4:0:0	SL4.0CH09	17552698	BND	T	]SL4.0CH09:17552698]T	0	0	60
SL4.0ch02	23715697	MantaBND:234055:0:1:0:0:0:0	SL4.0CH10	42998251	BND	G	G]SL4.0CH10:42998251]	1	0	59
SL4.0ch02	24995686	MantaBND:21691:22:23:0:1:0:1	SL4.0CH05	10853729	BND	T	[SL4.0CH05:10853729[T	2	0	58
SL4.0ch02	25301929	MantaBND:128:2074:4137:0:0:0:0	SL4.0CH04	44362122	BND	A	[SL4.0CH04:44362122[A	0	1	59
SL4.0ch02	25432997	MantaBND:231553:2:6:0:0:0:0	SL4.0CH09	56420752	BND	T	T[SL4.0CH09:56420752[	1	0	59
SL4.0ch02	25564012	MantaBND:237641:0:1:0:1:0:1	SL4.0CH02	25565340	BND	T	[SL4.0CH02:25565340[T	0	1	59
SL4.0ch02	25565340	MantaBND:237641:0:1:0:1:0:0	SL4.0CH02	25564012	BND	G	[SL4.0CH02:25564012[G	0	1	59
SL4.0ch02	25653873	MantaBND:128:14171:14176:0:2:0:1	SL4.0CH03	41488122	BND	T	[SL4.0CH03:41488122[T	3	0	57
SL4.0ch02	25654251	MantaBND:128:14176:14179:0:8:0:1	SL4.0CH02	43665965	BND	A	ACTTACCTGATGATGTGAATAAGAAGTGAAGAATTCTAAATTGTAAGATAAAAAACTGAAATAGAAGAAAAATAAATAAGAA]SL4.0CH02:43665965]	2	0	58
SL4.0ch02	25903627	MantaBND:139259:0:1:0:0:0:1	SL4.0CH01	68941466	BND	A	[SL4.0CH01:68941466[A	2	0	58
SL4.0ch02	26060494	MantaBND:128:4240:4242:0:1:0:0	SL4.0CH07	61250661	BND	T	TCTCAATATTTATCTTTA]SL4.0CH07:61250661]	1	0	59
SL4.0ch02	26206710	MantaBND:128:43848:43850:0:0:0:1	SL4.0CH11	1042929	BND	T	[SL4.0CH11:1042929[T	1	0	59
SL4.0ch02	26212021	MantaBND:238618:0:2:0:0:0:1	SL4.0CH12	65180647	BND	T	[SL4.0CH12:65180647[T	1	0	59
SL4.0ch02	26751395	MantaBND:128:32512:32520:0:0:0:0	SL4.0CH11	19553609	BND	A	A[SL4.0CH11:19553609[	1	0	59
SL4.0ch02	26999540	MantaBND:128:4253:4254:0:0:0:0	SL4.0CH02	27093562	BND	C	C]SL4.0CH02:27093562]	1	0	59
SL4.0ch02	27002824	MantaBND:128:2663:2665:0:0:0:1	SL4.0CH00	8383526	BND	A	[SL4.0CH00:8383526[A	0	1	59
SL4.0ch02	27093562	MantaBND:128:4253:4254:0:0:0:1	SL4.0CH02	26999540	BND	T	T]SL4.0CH02:26999540]	1	0	59
SL4.0ch02	27473256	MantaBND:240516:0:1:0:0:0:0	SL4.0CH10	52452716	BND	A	A]SL4.0CH10:52452716]	1	0	59
SL4.0ch02	27488873	MantaBND:128:37265:37517:0:8:0:0	SL4.0CH09	60092516	BND	T	TGAACTGAACACAATGTTGATTTTTAACTAGTAATAATACTACTTACAGACAGCAGCTCCAATCACACA[SL4.0CH09:60092516[	1	0	59
SL4.0ch02	27489001	MantaBND:26:22647:22648:2:0:0:0	SL4.0CH09	60103608	BND	A	A[SL4.0CH09:60103608[	0	0	60
SL4.0ch02	28330290	MantaBND:241662:0:2:0:1:0:0	SL4.0CH05	64534832	BND	C	C[SL4.0CH05:64534832[	1	0	59
SL4.0ch02	28331288	MantaBND:241845:0:2:0:3:0:1	SL4.0CH04	51080044	BND	A	AG[SL4.0CH04:51080044[	2	0	58
SL4.0ch02	29217070	MantaBND:128:7156:7158:1:1:0:1	SL4.0CH03	49564314	BND	T	[SL4.0CH03:49564314[T	1	0	59
SL4.0ch02	29721618	MantaBND:128:4292:4295:0:0:0:1	SL4.0CH05	24589663	BND	A	A]SL4.0CH05:24589663]	1	0	59
SL4.0ch02	29818496	MantaBND:128:50217:50218:0:0:0:1	SL4.0CH02	30048160	BND	A	A]SL4.0CH02:30048160]	0	1	59
SL4.0ch02	29860485	MantaBND:128:42394:42668:0:0:0:0	SL4.0CH10	50777515	BND	T	]SL4.0CH10:50777515]T	1	0	59
SL4.0ch02	29910073	MantaBND:128:4296:4297:0:1:0:1	SL4.0CH11	16935008	BND	C	CAATTCATCATGAGAACCTAAA]SL4.0CH11:16935008]	1	0	59
SL4.0ch02	30048158	MantaBND:128:50217:50218:0:0:0:0	SL4.0CH02	29818498	BND	A	A]SL4.0CH02:29818498]	0	1	59
SL4.0ch02	30066009	MantaBND:244108:0:1:0:0:0:1	SL4.0CH10	9299970	BND	G	]SL4.0CH10:9299970]G	1	0	59
SL4.0ch02	30587116	MantaBND:128:3318:3319:0:0:0:1	SL4.0CH01	88238628	BND	A	A]SL4.0CH01:88238628]	1	0	59
SL4.0ch02	31376937	MantaBND:128:13236:13237:0:0:0:1	SL4.0CH07	67071238	BND	T	T[SL4.0CH07:67071238[	1	0	59
SL4.0ch02	31467889	MantaBND:245976:0:3:0:0:0:1	SL4.0CH02	31673816	BND	G	[SL4.0CH02:31673816[G	1	0	59
SL4.0ch02	31470159	MantaBND:246161:0:1:0:4:0:0	SL4.0CH02	31658130	BND	G	GTCTGCTAATTACAAGTTCATACCCAAATCCAAATGGATTAAATTTTTCGTCTGCT]SL4.0CH02:31658130]	1	1	58
SL4.0ch02	31614126	MantaBND:128:8003:8013:0:0:0:0	SL4.0CH08	21998884	BND	A	]SL4.0CH08:21998884]AAA	1	0	59
SL4.0ch02	31658130	MantaBND:246161:0:1:0:4:0:1	SL4.0CH02	31470159	BND	T	TAGCAGACGAAAAATTTAATCCATTTGGATTTGGGTATGAACTTGTAATTAGCAGA]SL4.0CH02:31470159]	1	1	58
SL4.0ch02	31673816	MantaBND:245976:0:3:0:0:0:0	SL4.0CH02	31467889	BND	C	[SL4.0CH02:31467889[C	1	0	59
SL4.0ch02	31756509	MantaBND:19703:3:4:0:0:0:1	SL4.0CH05	10325787	BND	A	A]SL4.0CH05:10325787]	0	0	60
SL4.0ch02	32331591	MantaBND:247851:0:1:0:0:0:0	SL4.0CH12	57101153	BND	T	T[SL4.0CH12:57101153[	1	0	59
SL4.0ch02	32357419	MantaBND:247674:0:1:0:0:0:1	SL4.0CH02	32360520	BND	T	T]SL4.0CH02:32360520]	1	0	59
SL4.0ch02	32360520	MantaBND:247674:0:1:0:0:0:0	SL4.0CH02	32357419	BND	G	G]SL4.0CH02:32357419]	1	0	59
SL4.0ch02	32376318	MantaBND:247892:0:1:0:7:0:1	SL4.0CH02	32382846	BND	A	AAGATCAATTCCCAAGTCCTTGACATGTCTGCACGTAGTTAGATCAAGTAGTTTGCGGGTCTAACA]SL4.0CH02:32382846]	1	0	59
SL4.0ch02	32382846	MantaBND:247892:0:1:0:7:0:0	SL4.0CH02	32376318	BND	C	CTGTTAGACCCGCAAACTACTTGATCTAACTACGTGCAGACATGTCAAGGACTTGGGAATTGATCT]SL4.0CH02:32376318]	1	0	59
SL4.0ch02	32390115	MantaBND:248032:0:1:0:0:0:1	SL4.0CH06	4842287	BND	A	A]SL4.0CH06:4842287]	1	0	59
SL4.0ch02	32391978	MantaBND:247987:0:1:0:0:0:1	SL4.0CH07	54456726	BND	A	A]SL4.0CH07:54456726]	1	0	59
SL4.0ch02	33023572	MantaBND:128:27836:27838:0:4:0:1	SL4.0CH02	33026542	BND	T	TTGGTG]SL4.0CH02:33026542]	1	1	58
SL4.0ch02	33026542	MantaBND:128:27836:27838:0:4:0:0	SL4.0CH02	33023572	BND	T	TCACCA]SL4.0CH02:33023572]	1	1	58
SL4.0ch02	33825965	MantaBND:128:9904:9915:0:0:0:1	SL4.0CH02	12416227	BND	A	A]SL4.0CH02:12416227]	1	0	59
SL4.0ch02	33914065	MantaBND:128:4427:4443:0:0:0:0	SL4.0CH08	3422163	BND	C	[SL4.0CH08:3422163[C	1	0	59
SL4.0ch02	34102746	MantaBND:251536:0:1:0:0:0:0	SL4.0CH11	50947942	BND	A	A]SL4.0CH11:50947942]	1	0	59
SL4.0ch02	34320370	MantaBND:251691:0:1:0:0:0:0	SL4.0CH06	21222204	BND	G	G[SL4.0CH06:21222204[	1	0	59
SL4.0ch02	34464833	MantaBND:128:37401:37402:0:1:0:1	SL4.0CH02	35455634	BND	T	[SL4.0CH02:35455634[T	1	0	59
SL4.0ch02	35455634	MantaBND:128:37401:37402:0:1:0:0	SL4.0CH02	34464833	BND	A	[SL4.0CH02:34464833[A	1	0	59
SL4.0ch02	35614512	MantaBND:128:50716:50717:0:6:0:1	SL4.0CH11	50718807	BND	A	]SL4.0CH11:50718807]ACCATGATAGTGAAGGGATATCAACTATGTA	3	0	57
SL4.0ch02	35719472	MantaBND:105910:1:2:0:0:0:1	SL4.0CH06	31619298	BND	A	[SL4.0CH06:31619298[A	2	0	58
SL4.0ch02	36048064	MantaBND:255436:0:1:0:0:0:0	SL4.0CH09	7451068	BND	A	]SL4.0CH09:7451068]A	3	0	57
SL4.0ch02	36075829	MantaBND:147795:1:3:0:7:0:1	SL4.0CH01	80364317	BND	A	]SL4.0CH01:80364317]A	2	0	58
SL4.0ch02	36264627	MantaBND:256139:0:1:0:1:0:1	SL4.0CH06	34459165	BND	T	]SL4.0CH06:34459165]T	1	0	59
SL4.0ch02	36671719	MantaBND:128:35588:35593:0:7:0:1	SL4.0CH01	52688419	BND	T	TACAGT]SL4.0CH01:52688419]	1	0	59
SL4.0ch02	36743001	MantaBND:156210:0:1:0:0:0:1	SL4.0CH04	5184785	BND	C	C]SL4.0CH04:5184785]	0	0	60
SL4.0ch02	36765350	MantaBND:128:50973:50976:0:5:0:0	SL4.0CH11	51626118	BND	G	]SL4.0CH11:51626118]G	1	0	59
SL4.0ch02	36768995	MantaBND:128:50867:50867:16:1:0:1	SL4.0CH02	36769244	BND	T	T]SL4.0CH02:36769244]	1	0	59
SL4.0ch02	36769244	MantaBND:128:50867:50867:16:1:0:0	SL4.0CH02	36768995	BND	C	C]SL4.0CH02:36768995]	1	0	59
SL4.0ch02	36769969	MantaBND:128:50867:50871:0:1:0:0	SL4.0CH11	51626004	BND	C	CCTATCAACTCATTTTGTGAAAAAATCCATCTTTATTGCAATACCATC[SL4.0CH11:51626004[	2	0	58
SL4.0ch02	37111364	MantaBND:128:23684:23685:0:3:0:1	SL4.0CH07	4410978	BND	T	TATGGGATGTTTTTGCTCTTTCAG[SL4.0CH07:4410978[	1	0	59
SL4.0ch02	37276038	MantaBND:258144:0:1:0:0:0:1	SL4.0CH06	44552645	BND	G	G]SL4.0CH06:44552645]	1	0	59
SL4.0ch02	37320533	MantaBND:258230:0:2:1:0:0:1	SL4.0CH06	41492894	BND	G	[SL4.0CH06:41492894[G	1	0	59
SL4.0ch02	37707574	MantaBND:248020:3:4:0:0:0:1	SL4.0CH02	39382475	BND	T	[SL4.0CH02:39382475[CACTAAAAAAGGTTGT	1	0	59
SL4.0ch02	37823092	MantaBND:128:25111:25114:1:0:0:0	SL4.0CH02	37823566	BND	T	[SL4.0CH02:37823566[T	0	1	59
SL4.0ch02	37823563	MantaBND:128:25111:25114:1:0:0:1	SL4.0CH02	37823095	BND	T	[SL4.0CH02:37823095[T	0	1	59
SL4.0ch02	37918094	MantaBND:259662:0:1:0:1:0:0	SL4.0CH10	54623178	BND	A	ACATGTC[SL4.0CH10:54623178[	1	0	59
SL4.0ch02	38311717	MantaBND:260784:0:2:0:6:0:0	SL4.0CH05	20563171	BND	A	AAAAAAAAAAAT[SL4.0CH05:20563171[	1	0	59
SL4.0ch02	38657679	MantaBND:261621:0:1:0:0:0:0	SL4.0CH03	3518357	BND	T	]SL4.0CH03:3518357]T	0	0	60
SL4.0ch02	38870876	MantaBND:262147:0:1:0:0:0:0	SL4.0CH11	38395160	BND	A	A[SL4.0CH11:38395160[	1	0	59
SL4.0ch02	39022452	MantaBND:262306:0:1:0:0:0:0	SL4.0CH08	59676746	BND	A	ACAAGATATTCCT]SL4.0CH08:59676746]	1	0	59
SL4.0ch02	39023425	MantaBND:128:21625:21630:1:0:0:1	SL4.0CH05	43270575	BND	A	]SL4.0CH05:43270575]A	2	0	58
SL4.0ch02	39023588	MantaBND:128:21625:21630:0:0:0:1	SL4.0CH05	43270210	BND	T	T[SL4.0CH05:43270210[	2	0	58
SL4.0ch02	39068305	MantaBND:262162:2:3:0:4:0:0	SL4.0CH05	18052274	BND	A	[SL4.0CH05:18052274[A	1	0	59
SL4.0ch02	39069306	MantaBND:262162:1:2:0:0:0:0	SL4.0CH05	18052148	BND	C	C]SL4.0CH05:18052148]	1	0	59
SL4.0ch02	39171354	MantaBND:128:14164:14167:1:0:0:1	SL4.0CH02	44386435	BND	T	T]SL4.0CH02:44386435]	1	0	59
SL4.0ch02	39382475	MantaBND:248020:3:4:0:0:0:0	SL4.0CH02	37707574	BND	T	[SL4.0CH02:37707574[CAACCTTTTTTAGTGT	1	0	59
SL4.0ch02	39739836	MantaBND:128:4479:4480:0:3:0:0	SL4.0CH09	7331339	BND	C	]SL4.0CH09:7331339]TAC	1	0	59
SL4.0ch02	39811237	MantaBND:263989:0:1:0:1:0:0	SL4.0CH12	9829476	BND	T	[SL4.0CH12:9829476[TTATGTACAAAGAGTTGTTTTATTT	0	1	59
SL4.0ch02	39811788	MantaBND:32038:1:2:0:1:0:1	SL4.0CH07	65874986	BND	T	T]SL4.0CH07:65874986]	1	0	59
SL4.0ch02	39996287	MantaBND:26:2857:2858:0:0:0:0	SL4.0CH12	60434704	BND	A	]SL4.0CH12:60434704]A	0	0	60
SL4.0ch02	40258973	MantaBND:128:26099:26101:0:0:0:1	SL4.0CH01	1869004	BND	A	[SL4.0CH01:1869004[A	1	0	59
SL4.0ch02	40370655	MantaBND:265522:0:2:0:0:0:0	SL4.0CH09	8890295	BND	T	[SL4.0CH09:8890295[T	1	0	59
SL4.0ch02	40955845	MantaBND:128:44246:44255:0:9:0:0	SL4.0CH06	3838858	BND	C	C]SL4.0CH06:3838858]	3	0	57
SL4.0ch02	41168124	MantaBND:267570:0:1:0:5:0:1	SL4.0CH04	37576225	BND	A	A[SL4.0CH04:37576225[	1	0	59
SL4.0ch02	41180344	MantaBND:128:16345:16358:0:0:0:0	SL4.0CH06	40560375	BND	G	G]SL4.0CH06:40560375]	1	0	59
SL4.0ch02	41375003	MantaBND:148912:9:14:2:9:0:1	SL4.0CH05	5029741	BND	T	[SL4.0CH05:5029741[T	2	0	58
SL4.0ch02	41375369	MantaBND:148912:14:15:1:0:0:0	SL4.0CH06	2518517	BND	A	[SL4.0CH06:2518517[A	2	0	58
SL4.0ch02	41375413	MantaBND:148912:14:15:0:0:0:1	SL4.0CH06	2518927	BND	G	G]SL4.0CH06:2518927]	2	0	58
SL4.0ch02	41375564	MantaBND:148912:9:14:1:7:0:0	SL4.0CH05	5029292	BND	A	ATTCTCATTTATGAAAGA]SL4.0CH05:5029292]	2	0	58
SL4.0ch02	42108205	MantaBND:48971:1:2:0:0:0:1	SL4.0CH02	43416931	BND	C	[SL4.0CH02:43416931[C	0	0	60
SL4.0ch02	42293860	MantaBND:270166:0:1:0:0:0:0	SL4.0CH04	49806932	BND	T	]SL4.0CH04:49806932]T	2	0	58
SL4.0ch02	42609337	MantaBND:270926:0:1:0:0:0:1	SL4.0CH10	4223438	BND	T	[SL4.0CH10:4223438[T	1	0	59
SL4.0ch02	42778730	MantaBND:128:39475:39476:0:0:0:0	SL4.0CH04	63860384	BND	A	]SL4.0CH04:63860384]A	1	0	59
SL4.0ch02	42779122	MantaBND:128:39475:39480:0:0:0:0	SL4.0CH04	63860250	BND	T	T[SL4.0CH04:63860250[	1	0	59
SL4.0ch02	43176968	MantaBND:128:49677:49701:0:4:0:1	SL4.0CH06	36592642	BND	A	]SL4.0CH06:36592642]CA	1	0	59
SL4.0ch02	43176973	MantaBND:128:49584:49701:1:6:0:1	SL4.0CH11	4591664	BND	G	G]SL4.0CH11:4591664]	3	0	57
SL4.0ch02	43177053	MantaBND:128:49584:49701:0:2:0:1	SL4.0CH11	4591279	BND	T	[SL4.0CH11:4591279[T	3	0	57
SL4.0ch02	43416931	MantaBND:48971:1:2:0:0:0:0	SL4.0CH02	42108205	BND	A	[SL4.0CH02:42108205[A	0	0	60
SL4.0ch02	43416955	MantaBND:269597:0:2:0:0:0:0	SL4.0CH02	42108158	BND	C	[SL4.0CH02:42108158[C	0	0	60
SL4.0ch02	43416956	MantaBND:170170:0:1:0:0:0:0	SL4.0CH02	42108158	BND	G	[SL4.0CH02:42108158[G	0	0	60
SL4.0ch02	43532887	MantaBND:128:8074:8075:0:3:0:0	SL4.0CH11	10789785	BND	C	C[SL4.0CH11:10789785[	2	0	58
SL4.0ch02	43665965	MantaBND:128:14176:14179:0:8:0:0	SL4.0CH02	25654251	BND	A	ATTCTTATTTATTTTTCTTCTATTTCAGTTTTTTATCTTACAATTTAGAATTCTTCACTTCTTATTCACATCATCAGGTAAG]SL4.0CH02:25654251]	2	0	58
SL4.0ch02	44218706	MantaBND:9943:23:24:0:2:0:1	SL4.0CH06	22425759	BND	T	[SL4.0CH06:22425759[T	0	0	60
SL4.0ch02	44299808	MantaBND:128:4794:4812:1:0:0:1	SL4.0CH01	82877651	BND	A	A[SL4.0CH01:82877651[	1	0	59
SL4.0ch02	44313800	MantaBND:128:4668:4670:1:0:0:1	SL4.0CH05	2553704	BND	G	[SL4.0CH05:2553704[G	1	0	59
SL4.0ch02	44313843	MantaBND:128:4668:4670:0:1:0:0	SL4.0CH05	2553993	BND	A	AT]SL4.0CH05:2553993]	1	0	59
SL4.0ch02	44330430	MantaBND:274724:0:1:1:0:0:0	SL4.0CH02	44331026	BND	A	[SL4.0CH02:44331026[A	0	0	60
SL4.0ch02	44386053	MantaBND:128:14163:14164:0:0:0:1	SL4.0CH01	75174409	BND	T	T]SL4.0CH01:75174409]	1	0	59
SL4.0ch02	44386435	MantaBND:128:14164:14167:1:0:0:0	SL4.0CH02	39171354	BND	C	C]SL4.0CH02:39171354]	1	0	59
SL4.0ch02	44832070	MantaBND:128:45033:45034:0:1:0:0	SL4.0CH08	58299829	BND	C	[SL4.0CH08:58299829[C	2	0	58
SL4.0ch02	44832293	MantaBND:275945:0:1:0:5:0:0	SL4.0CH09	1775001	BND	C	CAG[SL4.0CH09:1775001[	2	0	58
SL4.0ch02	44942728	MantaBND:162:915:926:0:0:0:1	SL4.0CH06	22451175	BND	T	]SL4.0CH06:22451175]T	0	0	60
SL4.0ch02	44957468	MantaBND:128:26109:26115:0:0:0:1	SL4.0CH06	36391075	BND	G	G[SL4.0CH06:36391075[	1	0	59
SL4.0ch02	45182174	MantaBND:276754:0:2:0:0:0:0	SL4.0CH10	40829178	BND	C	C[SL4.0CH10:40829178[	1	0	59
SL4.0ch02	45614976	MantaBND:145869:1:4:0:0:0:1	SL4.0CH02	45762759	BND	T	[SL4.0CH02:45762759[T	1	0	59
SL4.0ch02	45762754	MantaBND:145869:1:4:0:0:0:0	SL4.0CH02	45614981	BND	A	[SL4.0CH02:45614981[A	1	0	59
SL4.0ch02	46222428	MantaBND:128:6982:6983:0:0:0:0	SL4.0CH03	44725100	BND	T	T[SL4.0CH03:44725100[	1	0	59
SL4.0ch02	46989686	MantaBND:280997:0:1:0:1:0:1	SL4.0CH03	63532603	BND	C	[SL4.0CH03:63532603[C	1	0	59
SL4.0ch02	47123768	MantaBND:128:18649:18650:0:0:0:0	SL4.0CH06	33912801	BND	C	C]SL4.0CH06:33912801]	2	0	58
SL4.0ch02	47505783	MantaBND:128:3980:4957:0:0:0:0	SL4.0CH06	25694541	BND	A	]SL4.0CH06:25694541]A	1	0	59
SL4.0ch02	47506061	MantaBND:128:4957:4961:0:0:0:0	SL4.0CH09	15465699	BND	A	A]SL4.0CH09:15465699]	1	0	59
SL4.0ch02	47955402	MantaBND:243820:2:13:0:1:0:1	SL4.0CH10	20195538	BND	C	C[SL4.0CH10:20195538[	0	1	59
SL4.0ch02	48051752	MantaBND:128:38421:38425:0:0:0:0	SL4.0CH03	56559001	BND	T	]SL4.0CH03:56559001]T	1	0	59
SL4.0ch02	48271396	MantaBND:283874:0:1:1:0:0:1	SL4.0CH02	48271616	BND	A	[SL4.0CH02:48271616[TATA	0	1	59
SL4.0ch02	48271616	MantaBND:283874:0:1:1:0:0:0	SL4.0CH02	48271396	BND	T	[SL4.0CH02:48271396[ATAT	0	1	59
SL4.0ch02	48343721	MantaBND:283984:0:0:3:0:0:0	SL4.0CH02	48343931	BND	C	[SL4.0CH02:48343931[AGCAAACAAGAGAAGATGAAATAAAATTTAAATTTTAAGATATGGTACAATGACTATGTTCTAATACCAGC	0	2	58
SL4.0ch02	48343931	MantaBND:283984:0:0:3:0:0:1	SL4.0CH02	48343721	BND	C	[SL4.0CH02:48343721[CTGGTATTAGAACATAGTCATTGTACCATATCTTAAAATTTAAATTTTATTTCATCTTCTCTTGTTTGCTC	0	2	58
SL4.0ch02	48402180	MantaBND:128:7295:7295:6:6:0:1	SL4.0CH02	48402637	BND	A	A]SL4.0CH02:48402637]	2	0	58
SL4.0ch02	48402209	MantaBND:128:7295:7295:8:0:0:0	SL4.0CH02	48402555	BND	T	[SL4.0CH02:48402555[GAAACTGCTT	1	0	59
SL4.0ch02	48402555	MantaBND:128:7295:7295:8:0:0:1	SL4.0CH02	48402209	BND	A	[SL4.0CH02:48402209[AGCAGTTTCA	1	0	59
SL4.0ch02	48402637	MantaBND:128:7295:7295:6:6:0:0	SL4.0CH02	48402180	BND	C	C]SL4.0CH02:48402180]	2	0	58
SL4.0ch02	49884966	MantaBND:287266:0:1:0:0:0:0	SL4.0CH05	7367175	BND	G	G[SL4.0CH05:7367175[	1	0	59
SL4.0ch02	50212337	MantaBND:288259:0:1:0:0:0:0	SL4.0CH09	57198869	BND	G	GGGAAAAATAA]SL4.0CH09:57198869]	2	0	58
SL4.0ch02	50646650	MantaBND:289398:0:3:0:0:0:1	SL4.0CH06	42923162	BND	T	T[SL4.0CH06:42923162[	1	0	59
SL4.0ch02	51447108	MantaBND:128:9387:9429:0:0:0:1	SL4.0CH04	57287989	BND	A	AA]SL4.0CH04:57287989]	2	0	58
SL4.0ch02	51447127	MantaBND:128:9324:9387:0:0:0:0	SL4.0CH04	57296753	BND	G	GCAA[SL4.0CH04:57296753[	3	0	57
SL4.0ch02	51555273	MantaBND:291631:0:1:0:0:0:1	SL4.0CH11	52550018	BND	A	A[SL4.0CH11:52550018[	1	0	59
SL4.0ch02	51746402	MantaBND:128:33961:33966:0:0:0:1	SL4.0CH11	19551639	BND	C	]SL4.0CH11:19551639]C	1	0	59
SL4.0ch02	53211438	MantaBND:295239:0:1:0:0:0:1	SL4.0CH07	60471547	BND	C	C]SL4.0CH07:60471547]	3	0	57
SL4.0ch02	53247842	MantaBND:295246:0:0:2:1:0:0	SL4.0CH02	53248206	BND	A	A]SL4.0CH02:53248206]	1	2	57
SL4.0ch02	53247865	MantaBND:295246:0:0:3:0:0:0	SL4.0CH02	53248241	BND	C	[SL4.0CH02:53248241[C	1	2	57
SL4.0ch02	53248202	MantaBND:295246:0:0:2:1:0:1	SL4.0CH02	53247846	BND	C	C]SL4.0CH02:53247846]	1	2	57
SL4.0ch02	53248237	MantaBND:295246:0:0:3:0:0:1	SL4.0CH02	53247869	BND	T	[SL4.0CH02:53247869[T	1	2	57
SL4.0ch02	53335626	MantaBND:23186:2:5:0:7:0:0	SL4.0CH12	2648139	BND	A	AGGA[SL4.0CH12:2648139[	1	0	59
SL4.0ch02	53335808	MantaBND:23186:2:5:1:8:0:1	SL4.0CH12	2648372	BND	T	]SL4.0CH12:2648372]T	1	0	59
SL4.0ch02	53344896	MantaBND:128:18371:18376:0:0:0:1	SL4.0CH06	31914904	BND	T	[SL4.0CH06:31914904[T	1	0	59
SL4.0ch03	448154	MantaBND:128:48792:48795:0:0:0:0	SL4.0CH11	52807870	BND	T	TCAT[SL4.0CH11:52807870[	0	0	60
SL4.0ch03	719489	MantaBND:297554:0:1:0:0:0:0	SL4.0CH10	57709053	BND	A	]SL4.0CH10:57709053]A	3	0	57
SL4.0ch03	1432312	MantaBND:299182:0:1:0:0:0:1	SL4.0CH09	59433359	BND	C	[SL4.0CH09:59433359[C	1	0	59
SL4.0ch03	1666788	MantaBND:128:48166:48202:0:0:0:0	SL4.0CH04	21013222	BND	G	]SL4.0CH04:21013222]G	1	0	59
SL4.0ch03	1666952	MantaBND:128:48165:48170:0:6:0:1	SL4.0CH11	53162480	BND	T	T]SL4.0CH11:53162480]	1	0	59
SL4.0ch03	1878243	MantaBND:193743:1:2:0:0:0:1	SL4.0CH05	58206040	BND	T	[SL4.0CH05:58206040[T	1	0	59
SL4.0ch03	2088275	MantaBND:214980:0:1:0:0:0:1	SL4.0CH02	13922497	BND	A	[SL4.0CH02:13922497[A	1	0	59
SL4.0ch03	2147573	MantaBND:300811:0:1:0:0:0:1	SL4.0CH03	2414244	BND	T	[SL4.0CH03:2414244[AGAATTTCAGT	2	0	58
SL4.0ch03	2414244	MantaBND:300811:0:1:0:0:0:0	SL4.0CH03	2147573	BND	T	[SL4.0CH03:2147573[CTGAAATTCTT	2	0	58
SL4.0ch03	2616003	MantaBND:128:38311:38313:1:0:0:0	SL4.0CH09	59369483	BND	A	A[SL4.0CH09:59369483[	1	0	59
SL4.0ch03	3115432	MantaBND:28839:2:5:0:0:0:0	SL4.0CH08	56883037	BND	C	[SL4.0CH08:56883037[C	1	0	59
SL4.0ch03	3397426	MantaBND:303808:0:1:0:0:0:0	SL4.0CH07	8322775	BND	A	]SL4.0CH07:8322775]A	1	0	59
SL4.0ch03	3518357	MantaBND:261621:0:1:0:0:0:1	SL4.0CH02	38657679	BND	A	A[SL4.0CH02:38657679[	0	0	60
SL4.0ch03	3715018	MantaBND:304638:0:1:0:2:0:0	SL4.0CH12	62952517	BND	G	G]SL4.0CH12:62952517]	1	0	59
SL4.0ch03	3715529	MantaBND:162:26208:26224:0:0:0:0	SL4.0CH05	63369957	BND	A	ACAA]SL4.0CH05:63369957]	0	0	60
SL4.0ch03	4062421	MantaBND:305351:0:1:0:0:0:1	SL4.0CH11	53777350	BND	T	]SL4.0CH11:53777350]T	1	0	59
SL4.0ch03	4154783	MantaBND:128:49443:49445:0:0:0:0	SL4.0CH03	19941469	BND	T	TG]SL4.0CH03:19941469]	1	0	59
SL4.0ch03	4154835	MantaBND:128:49443:49446:0:0:0:0	SL4.0CH03	19941192	BND	T	[SL4.0CH03:19941192[T	1	0	59
SL4.0ch03	4247457	MantaBND:128:48790:48791:0:0:0:1	SL4.0CH01	79509052	BND	G	GTCTTCT[SL4.0CH01:79509052[	0	1	59
SL4.0ch03	4598432	MantaBND:143:13932:13937:1:0:0:1	SL4.0CH09	39594	BND	A	[SL4.0CH09:39594[A	0	0	60
SL4.0ch03	5818077	MantaBND:308723:0:1:0:0:0:0	SL4.0CH11	8810998	BND	T	]SL4.0CH11:8810998]T	1	0	59
SL4.0ch03	5818085	MantaBND:308723:0:2:0:2:0:0	SL4.0CH11	8810063	BND	T	T[SL4.0CH11:8810063[	0	1	59
SL4.0ch03	5823746	MantaBND:128:6230:6234:0:0:0:1	SL4.0CH11	41006183	BND	T	T]SL4.0CH11:41006183]	1	0	59
SL4.0ch03	5918630	MantaBND:128:18402:18403:0:0:0:1	SL4.0CH12	54552154	BND	G	[SL4.0CH12:54552154[G	0	1	59
SL4.0ch03	5938014	MantaBND:309132:0:1:0:0:0:0	SL4.0CH04	28560605	BND	T	[SL4.0CH04:28560605[T	1	0	59
SL4.0ch03	6040076	MantaBND:309302:0:1:1:0:0:1	SL4.0CH03	6047006	BND	A	[SL4.0CH03:6047006[A	1	0	59
SL4.0ch03	6045669	MantaBND:51217:3:6:0:0:0:0	SL4.0CH01	30367058	BND	T	[SL4.0CH01:30367058[T	1	0	59
SL4.0ch03	6045948	MantaBND:51217:3:7:0:0:0:1	SL4.0CH01	30347205	BND	A	A]SL4.0CH01:30347205]	1	0	59
SL4.0ch03	6047006	MantaBND:309302:0:1:1:0:0:0	SL4.0CH03	6040076	BND	C	[SL4.0CH03:6040076[C	1	0	59
SL4.0ch03	6243803	MantaBND:128:4325:5265:0:0:0:0	SL4.0CH09	31279267	BND	A	A]SL4.0CH09:31279267]	0	1	59
SL4.0ch03	6452188	MantaBND:309866:0:1:1:4:0:1	SL4.0CH03	6452868	BND	A	[SL4.0CH03:6452868[A	1	0	59
SL4.0ch03	6452866	MantaBND:309866:0:1:1:4:0:0	SL4.0CH03	6452190	BND	G	[SL4.0CH03:6452190[G	1	0	59
SL4.0ch03	6491211	MantaBND:128:5269:8841:0:3:0:0	SL4.0CH05	374306	BND	C	CT]SL4.0CH05:374306]	0	2	58
SL4.0ch03	6813580	MantaBND:128:5061:5062:0:0:0:0	SL4.0CH03	6815001	BND	A	A]SL4.0CH03:6815001]	1	0	59
SL4.0ch03	6815001	MantaBND:128:5061:5062:0:0:0:1	SL4.0CH03	6813580	BND	T	T]SL4.0CH03:6813580]	1	0	59
SL4.0ch03	6816691	MantaBND:128:5062:8011:0:0:0:1	SL4.0CH11	8944847	BND	T	T[SL4.0CH11:8944847[	1	0	59
SL4.0ch03	6974136	MantaBND:310933:0:1:0:0:0:1	SL4.0CH05	58135753	BND	T	T[SL4.0CH05:58135753[	1	0	59
SL4.0ch03	7146581	MantaBND:150729:0:1:1:3:0:0	SL4.0CH01	74171285	BND	T	]SL4.0CH01:74171285]T	2	0	58
SL4.0ch03	7147705	MantaBND:128:9178:9179:0:0:0:1	SL4.0CH01	9284797	BND	C	C]SL4.0CH01:9284797]	1	0	59
SL4.0ch03	7780987	MantaBND:128:6602:6603:0:0:0:1	SL4.0CH08	4077299	BND	A	[SL4.0CH08:4077299[A	1	0	59
SL4.0ch03	8099377	MantaBND:128:22049:22049:5:0:0:0	SL4.0CH03	8099505	BND	T	[SL4.0CH03:8099505[T	1	0	59
SL4.0ch03	8099505	MantaBND:128:22049:22049:5:0:0:1	SL4.0CH03	8099377	BND	T	[SL4.0CH03:8099377[T	1	0	59
SL4.0ch03	8517195	MantaBND:89508:1:2:0:0:0:0	SL4.0CH09	45979519	BND	G	G[SL4.0CH09:45979519[	1	0	59
SL4.0ch03	8809371	MantaBND:128:7513:7514:0:0:0:1	SL4.0CH01	89512934	BND	A	]SL4.0CH01:89512934]A	1	0	59
SL4.0ch03	9165325	MantaBND:314771:0:1:0:3:0:0	SL4.0CH03	9193714	BND	T	T]SL4.0CH03:9193714]	0	3	57
SL4.0ch03	9193712	MantaBND:314771:0:1:0:3:0:1	SL4.0CH03	9165327	BND	T	T]SL4.0CH03:9165327]	0	3	57
SL4.0ch03	9560483	MantaBND:315796:0:1:0:0:0:1	SL4.0CH04	54789644	BND	A	[SL4.0CH04:54789644[A	1	0	59
SL4.0ch03	9833631	MantaBND:316059:0:2:0:0:0:0	SL4.0CH03	9841201	BND	T	T]SL4.0CH03:9841201]	1	0	59
SL4.0ch03	9833703	MantaBND:316059:0:2:1:0:0:0	SL4.0CH03	9840905	BND	A	[SL4.0CH03:9840905[A	1	0	59
SL4.0ch03	9840905	MantaBND:316059:0:2:1:0:0:1	SL4.0CH03	9833703	BND	A	[SL4.0CH03:9833703[A	1	0	59
SL4.0ch03	9841201	MantaBND:316059:0:2:0:0:0:1	SL4.0CH03	9833631	BND	A	A]SL4.0CH03:9833631]	1	0	59
SL4.0ch03	9925593	MantaBND:128:39475:39479:0:0:0:1	SL4.0CH04	63860122	BND	A	A[SL4.0CH04:63860122[	1	0	59
SL4.0ch03	10586590	MantaBND:128:5287:5288:0:6:0:0	SL4.0CH03	10589031	BND	C	[SL4.0CH03:10589031[C	1	0	59
SL4.0ch03	10589031	MantaBND:128:5287:5288:0:6:0:1	SL4.0CH03	10586590	BND	C	[SL4.0CH03:10586590[C	1	0	59
SL4.0ch03	10670188	MantaBND:148614:1:3:0:0:0:1	SL4.0CH11	48806540	BND	T	T[SL4.0CH11:48806540[	1	0	59
SL4.0ch03	10670286	MantaBND:148614:1:3:1:0:0:0	SL4.0CH11	48807035	BND	C	]SL4.0CH11:48807035]C	2	0	58
SL4.0ch03	10671572	MantaBND:128:24111:24134:0:0:0:1	SL4.0CH06	47121426	BND	A	A]SL4.0CH06:47121426]	2	0	58
SL4.0ch03	10671726	MantaBND:128:24108:24111:0:0:0:0	SL4.0CH06	47119294	BND	T	[SL4.0CH06:47119294[T	2	0	58
SL4.0ch03	10684054	MantaBND:128:24109:24136:0:6:0:1	SL4.0CH12	44796401	BND	G	G[SL4.0CH12:44796401[	0	1	59
SL4.0ch03	10693132	MantaBND:56997:0:1:0:1:0:0	SL4.0CH01	26021578	BND	G	]SL4.0CH01:26021578]CTTG	1	0	59
SL4.0ch03	10855143	MantaBND:128:29195:29196:0:0:0:0	SL4.0CH10	54634808	BND	A	]SL4.0CH10:54634808]CAA	1	0	59
SL4.0ch03	10870182	MantaBND:128:10057:43237:0:0:0:0	SL4.0CH10	56670375	BND	A	A[SL4.0CH10:56670375[	1	1	58
SL4.0ch03	10989455	MantaBND:318398:0:1:0:0:0:1	SL4.0CH09	47914798	BND	A	[SL4.0CH09:47914798[A	1	0	59
SL4.0ch03	11361839	MantaBND:140388:0:1:0:0:0:1	SL4.0CH01	69362209	BND	A	A[SL4.0CH01:69362209[	1	0	59
SL4.0ch03	11385005	MantaBND:319395:0:1:0:1:0:0	SL4.0CH03	11407163	BND	G	G]SL4.0CH03:11407163]	0	1	59
SL4.0ch03	11407161	MantaBND:319395:0:1:0:1:0:1	SL4.0CH03	11385007	BND	T	T]SL4.0CH03:11385007]	0	1	59
SL4.0ch03	11480210	MantaBND:319565:0:1:0:0:0:0	SL4.0CH10	17665411	BND	A	A]SL4.0CH10:17665411]	1	0	59
SL4.0ch03	11612498	MantaBND:319772:0:1:0:0:0:1	SL4.0CH03	11614612	BND	T	[SL4.0CH03:11614612[T	0	1	59
SL4.0ch03	11614609	MantaBND:319772:0:1:0:0:0:0	SL4.0CH03	11612501	BND	T	[SL4.0CH03:11612501[T	0	1	59
SL4.0ch03	12099978	MantaBND:121284:0:2:0:5:0:1	SL4.0CH01	58772585	BND	A	AGAGTAACA[SL4.0CH01:58772585[	1	0	59
SL4.0ch03	12205600	MantaBND:320996:0:1:0:7:0:1	SL4.0CH03	12339502	BND	A	AGTATAAATCATGTA]SL4.0CH03:12339502]	1	3	56
SL4.0ch03	12339502	MantaBND:320996:0:1:0:7:0:0	SL4.0CH03	12205600	BND	T	TTACATGATTTATAC]SL4.0CH03:12205600]	1	3	56
SL4.0ch03	12475301	MantaBND:128:766:3755:0:0:0:1	SL4.0CH06	10942691	BND	A	A]SL4.0CH06:10942691]	1	0	59
SL4.0ch03	14033819	MantaBND:128:49709:49714:0:0:0:0	SL4.0CH04	30987825	BND	A	A[SL4.0CH04:30987825[	1	0	59
SL4.0ch03	14969845	MantaBND:325055:0:1:1:0:0:0	SL4.0CH03	14970459	BND	A	A]SL4.0CH03:14970459]	1	0	59
SL4.0ch03	14969895	MantaBND:325055:0:1:2:3:0:0	SL4.0CH03	14970440	BND	T	[SL4.0CH03:14970440[T	0	1	59
SL4.0ch03	14970439	MantaBND:325055:0:1:2:3:0:1	SL4.0CH03	14969896	BND	A	[SL4.0CH03:14969896[A	0	1	59
SL4.0ch03	14970459	MantaBND:325055:0:1:1:0:0:1	SL4.0CH03	14969845	BND	C	C]SL4.0CH03:14969845]	1	0	59
SL4.0ch03	15898727	MantaBND:128:39599:39600:0:0:0:1	SL4.0CH03	15900973	BND	A	ATT]SL4.0CH03:15900973]	1	0	59
SL4.0ch03	15899052	MantaBND:128:39599:39600:1:0:0:0	SL4.0CH03	15900817	BND	T	[SL4.0CH03:15900817[CTT	1	0	59
SL4.0ch03	15900817	MantaBND:128:39599:39600:1:0:0:1	SL4.0CH03	15899052	BND	T	[SL4.0CH03:15899052[AGT	1	0	59
SL4.0ch03	15900973	MantaBND:128:39599:39600:0:0:0:0	SL4.0CH03	15898727	BND	C	CAA]SL4.0CH03:15898727]	1	0	59
SL4.0ch03	17258016	MantaBND:128:6058:6068:0:0:0:0	SL4.0CH10	60617425	BND	T	]SL4.0CH10:60617425]T	1	0	59
SL4.0ch03	17786912	MantaBND:329575:0:0:9:0:0:0	SL4.0CH03	17787402	BND	T	[SL4.0CH03:17787402[T	1	0	59
SL4.0ch03	17787399	MantaBND:329575:0:0:9:0:0:1	SL4.0CH03	17786915	BND	T	[SL4.0CH03:17786915[T	1	0	59
SL4.0ch03	17803517	MantaBND:128:35588:35589:0:0:0:0	SL4.0CH01	52688495	BND	A	]SL4.0CH01:52688495]A	1	0	59
SL4.0ch03	18265889	MantaBND:330466:0:2:0:0:0:1	SL4.0CH07	33146180	BND	G	G]SL4.0CH07:33146180]	1	0	59
SL4.0ch03	18718866	MantaBND:331087:0:3:0:3:0:0	SL4.0CH11	37045673	BND	C	C[SL4.0CH11:37045673[	1	0	59
SL4.0ch03	19327751	MantaBND:332379:0:1:0:0:0:1	SL4.0CH03	20258010	BND	T	T]SL4.0CH03:20258010]	0	1	59
SL4.0ch03	19327751	MantaBND:332379:0:1:1:0:0:0	SL4.0CH03	20258013	BND	T	[SL4.0CH03:20258013[CATT	1	0	59
SL4.0ch03	19331107	MantaBND:332367:0:1:0:0:0:1	SL4.0CH03	19495008	BND	T	TAT]SL4.0CH03:19495008]	1	0	59
SL4.0ch03	19333310	MantaBND:332181:0:1:0:0:0:0	SL4.0CH03	19339996	BND	A	AAAGGATCAA]SL4.0CH03:19339996]	0	1	59
SL4.0ch03	19339996	MantaBND:332181:0:1:0:0:0:1	SL4.0CH03	19333310	BND	T	TTTGATCCTT]SL4.0CH03:19333310]	0	1	59
SL4.0ch03	19455871	MantaBND:332498:1:2:0:0:0:1	SL4.0CH03	19518373	BND	C	[SL4.0CH03:19518373[C	0	1	59
SL4.0ch03	19495008	MantaBND:332367:0:1:0:0:0:0	SL4.0CH03	19331107	BND	T	TAT]SL4.0CH03:19331107]	1	0	59
SL4.0ch03	19518373	MantaBND:332498:1:2:0:0:0:0	SL4.0CH03	19455871	BND	A	[SL4.0CH03:19455871[A	0	1	59
SL4.0ch03	19941192	MantaBND:128:49443:49446:0:0:0:1	SL4.0CH03	4154835	BND	A	[SL4.0CH03:4154835[A	1	0	59
SL4.0ch03	19941469	MantaBND:128:49443:49445:0:0:0:1	SL4.0CH03	4154783	BND	A	AC]SL4.0CH03:4154783]	1	0	59
SL4.0ch03	19992701	MantaBND:152656:2:5:0:0:0:0	SL4.0CH08	53562979	BND	C	C[SL4.0CH08:53562979[	2	0	58
SL4.0ch03	20258009	MantaBND:332379:0:1:0:0:0:0	SL4.0CH03	19327752	BND	A	A]SL4.0CH03:19327752]	0	1	59
SL4.0ch03	20258013	MantaBND:332379:0:1:1:0:0:1	SL4.0CH03	19327751	BND	G	[SL4.0CH03:19327751[ATGG	1	0	59
SL4.0ch03	21989675	MantaBND:337416:0:0:11:0:0:1	SL4.0CH03	21990278	BND	T	T]SL4.0CH03:21990278]	0	1	59
SL4.0ch03	21990277	MantaBND:337416:0:0:11:0:0:0	SL4.0CH03	21989676	BND	G	G]SL4.0CH03:21989676]	0	1	59
SL4.0ch03	21996650	MantaBND:128:8545:8546:0:0:0:1	SL4.0CH09	22564921	BND	A	]SL4.0CH09:22564921]A	1	0	59
SL4.0ch03	21997835	MantaBND:84980:1:1:7:2:0:0	SL4.0CH03	21999022	BND	C	C]SL4.0CH03:21999022]	1	0	59
SL4.0ch03	21999018	MantaBND:84980:1:1:7:2:0:1	SL4.0CH03	21997839	BND	G	G]SL4.0CH03:21997839]	1	0	59
SL4.0ch03	22108093	MantaBND:26:19646:19647:0:0:0:0	SL4.0CH12	36939503	BND	C	[SL4.0CH12:36939503[C	0	0	60
SL4.0ch03	22662022	MantaBND:128:29589:29590:0:0:0:1	SL4.0CH12	61830612	BND	A	A]SL4.0CH12:61830612]	1	0	59
SL4.0ch03	23028940	MantaBND:276754:5:6:0:0:0:0	SL4.0CH05	14673564	BND	T	T]SL4.0CH05:14673564]	2	0	58
SL4.0ch03	23220980	MantaBND:340131:0:1:0:1:0:1	SL4.0CH10	58948819	BND	C	C[SL4.0CH10:58948819[	1	0	59
SL4.0ch03	23221224	MantaBND:340131:0:2:0:0:0:0	SL4.0CH10	58949504	BND	C	]SL4.0CH10:58949504]C	1	0	59
SL4.0ch03	23311065	MantaBND:128:2306:3153:0:0:0:0	SL4.0CH01	74228638	BND	G	[SL4.0CH01:74228638[G	1	0	59
SL4.0ch03	23311067	MantaBND:128:2306:5900:0:0:0:0	SL4.0CH11	25512886	BND	G	[SL4.0CH11:25512886[G	1	0	59
SL4.0ch03	23848800	MantaBND:155643:7:9:0:8:0:0	SL4.0CH07	62191965	BND	A	ATCTCTTCTCTCACAAAT]SL4.0CH07:62191965]	1	0	59
SL4.0ch03	24385833	MantaBND:128:15311:15317:0:0:0:0	SL4.0CH06	8532701	BND	C	[SL4.0CH06:8532701[C	1	0	59
SL4.0ch03	24715344	MantaBND:128:49796:49797:0:0:0:1	SL4.0CH06	31622396	BND	A	]SL4.0CH06:31622396]A	1	0	59
SL4.0ch03	25198245	MantaBND:344309:0:1:0:3:0:1	SL4.0CH03	25211806	BND	G	[SL4.0CH03:25211806[G	0	2	58
SL4.0ch03	25211806	MantaBND:344309:0:1:0:3:0:0	SL4.0CH03	25198245	BND	A	[SL4.0CH03:25198245[A	0	2	58
SL4.0ch03	25231081	MantaBND:344441:1:1:8:0:0:0	SL4.0CH03	25231280	BND	G	[SL4.0CH03:25231280[G	1	0	59
SL4.0ch03	25231280	MantaBND:344441:1:1:8:0:0:1	SL4.0CH03	25231081	BND	G	[SL4.0CH03:25231081[G	1	0	59
SL4.0ch03	25392855	MantaBND:344617:0:1:0:0:0:1	SL4.0CH03	25405162	BND	A	A]SL4.0CH03:25405162]	1	0	59
SL4.0ch03	25405162	MantaBND:344617:0:1:0:0:0:0	SL4.0CH03	25392855	BND	G	G]SL4.0CH03:25392855]	1	0	59
SL4.0ch03	25508254	MantaBND:128:1848:5966:0:0:0:1	SL4.0CH09	38042661	BND	A	[SL4.0CH09:38042661[A	1	0	59
SL4.0ch03	25524420	MantaBND:130216:0:1:0:0:0:1	SL4.0CH01	64048815	BND	T	]SL4.0CH01:64048815]T	1	0	59
SL4.0ch03	26586850	MantaBND:347237:0:2:0:0:0:1	SL4.0CH07	12502318	BND	C	C]SL4.0CH07:12502318]	1	0	59
SL4.0ch03	26868771	MantaBND:128:14357:14359:0:0:0:0	SL4.0CH08	6804521	BND	C	C[SL4.0CH08:6804521[	1	0	59
SL4.0ch03	28378515	MantaBND:350411:0:0:3:0:0:0	SL4.0CH03	28378879	BND	C	C]SL4.0CH03:28378879]	0	1	59
SL4.0ch03	28378516	MantaBND:350411:0:1:0:0:0:1	SL4.0CH03	28379288	BND	A	[SL4.0CH03:28379288[TA	1	0	59
SL4.0ch03	28378878	MantaBND:350411:0:0:3:0:0:1	SL4.0CH03	28378516	BND	C	C]SL4.0CH03:28378516]	0	1	59
SL4.0ch03	28379288	MantaBND:350411:0:1:0:0:0:0	SL4.0CH03	28378516	BND	C	[SL4.0CH03:28378516[AC	1	0	59
SL4.0ch03	28380999	MantaBND:128:23902:23903:1:0:0:1	SL4.0CH03	28382795	BND	T	[SL4.0CH03:28382795[T	1	0	59
SL4.0ch03	28382795	MantaBND:128:23902:23903:1:0:0:0	SL4.0CH03	28380999	BND	A	[SL4.0CH03:28380999[A	1	0	59
SL4.0ch03	28409825	MantaBND:128:27460:27464:0:0:0:1	SL4.0CH09	58192819	BND	G	]SL4.0CH09:58192819]G	1	0	59
SL4.0ch03	28419002	MantaBND:128:27463:27465:0:0:0:0	SL4.0CH06	22220108	BND	G	G]SL4.0CH06:22220108]	1	0	59
SL4.0ch03	28488087	MantaBND:171373:0:1:0:0:0:1	SL4.0CH01	82991783	BND	C	[SL4.0CH01:82991783[C	1	0	59
SL4.0ch03	29103770	MantaBND:11426:0:2:0:0:0:0	SL4.0CH01	1193522	BND	T	T]SL4.0CH01:1193522]	1	0	59
SL4.0ch03	29316720	MantaBND:91582:0:1:0:0:0:0	SL4.0CH01	44566165	BND	G	[SL4.0CH01:44566165[G	1	0	59
SL4.0ch03	29679153	MantaBND:66110:0:1:0:0:0:1	SL4.0CH01	30628012	BND	A	]SL4.0CH01:30628012]A	1	0	59
SL4.0ch03	29896021	MantaBND:352898:0:2:2:2:0:1	SL4.0CH03	29896432	BND	G	[SL4.0CH03:29896432[G	2	0	58
SL4.0ch03	29896398	MantaBND:352898:0:1:0:2:0:1	SL4.0CH03	29903302	BND	G	G]SL4.0CH03:29903302]	1	0	59
SL4.0ch03	29896431	MantaBND:352898:0:2:2:2:0:0	SL4.0CH03	29896022	BND	C	[SL4.0CH03:29896022[C	2	0	58
SL4.0ch03	29903298	MantaBND:352898:0:1:0:2:0:0	SL4.0CH03	29896402	BND	A	A]SL4.0CH03:29896402]	1	0	59
SL4.0ch03	30006507	MantaBND:46589:0:1:0:0:0:1	SL4.0CH01	20274837	BND	C	]SL4.0CH01:20274837]C	1	0	59
SL4.0ch03	30799286	MantaBND:355135:0:1:0:2:0:0	SL4.0CH03	30811782	BND	A	A]SL4.0CH03:30811782]	1	2	57
SL4.0ch03	30811778	MantaBND:355135:0:1:0:2:0:1	SL4.0CH03	30799290	BND	C	C]SL4.0CH03:30799290]	1	2	57
SL4.0ch03	31339413	MantaBND:128:5307:6119:0:0:0:1	SL4.0CH05	60412314	BND	C	]SL4.0CH05:60412314]C	2	0	58
SL4.0ch03	31339691	MantaBND:128:5307:6119:1:0:0:0	SL4.0CH05	60412368	BND	T	T[SL4.0CH05:60412368[	2	0	58
SL4.0ch03	31680384	MantaBND:356758:0:0:7:3:0:1	SL4.0CH03	31680848	BND	T	[SL4.0CH03:31680848[T	1	0	59
SL4.0ch03	31680846	MantaBND:356758:0:0:7:3:0:0	SL4.0CH03	31680386	BND	A	[SL4.0CH03:31680386[A	1	0	59
SL4.0ch03	31715502	MantaBND:356700:0:0:6:6:0:0	SL4.0CH03	31715834	BND	T	[SL4.0CH03:31715834[ATCTACTATTT	2	0	58
SL4.0ch03	31715529	MantaBND:356700:0:0:5:0:0:1	SL4.0CH03	31715818	BND	A	A]SL4.0CH03:31715818]	2	0	58
SL4.0ch03	31715818	MantaBND:356700:0:0:5:0:0:0	SL4.0CH03	31715529	BND	G	G]SL4.0CH03:31715529]	2	0	58
SL4.0ch03	31715834	MantaBND:356700:0:0:6:6:0:1	SL4.0CH03	31715502	BND	A	[SL4.0CH03:31715502[AATAGTAGATA	2	0	58
SL4.0ch03	31716257	MantaBND:126134:1:2:0:0:0:0	SL4.0CH12	45332314	BND	G	G]SL4.0CH12:45332314]	1	0	59
SL4.0ch03	31806334	MantaBND:128:17889:17890:0:0:0:1	SL4.0CH10	36331303	BND	C	[SL4.0CH10:36331303[C	1	0	59
SL4.0ch03	31935382	MantaBND:357166:0:1:1:3:0:0	SL4.0CH03	31935663	BND	G	[SL4.0CH03:31935663[CG	1	0	59
SL4.0ch03	31935663	MantaBND:357166:0:1:1:3:0:1	SL4.0CH03	31935382	BND	G	[SL4.0CH03:31935382[GG	1	0	59
SL4.0ch03	32443217	MantaBND:128:50221:50222:0:0:0:0	SL4.0CH12	8554345	BND	A	ATCCCA[SL4.0CH12:8554345[	1	0	59
SL4.0ch03	32538997	MantaBND:68947:17:18:0:0:0:1	SL4.0CH06	27687385	BND	T	T[SL4.0CH06:27687385[	0	0	60
SL4.0ch03	33063850	MantaBND:359363:0:1:0:1:0:1	SL4.0CH03	33064043	BND	T	T]SL4.0CH03:33064043]	0	1	59
SL4.0ch03	33063856	MantaBND:359363:0:1:1:5:0:1	SL4.0CH03	33064041	BND	A	[SL4.0CH03:33064041[CACA	1	0	59
SL4.0ch03	33064040	MantaBND:359363:0:1:0:1:0:0	SL4.0CH03	33063853	BND	A	A]SL4.0CH03:33063853]	0	1	59
SL4.0ch03	33064041	MantaBND:359363:0:1:1:5:0:0	SL4.0CH03	33063856	BND	G	[SL4.0CH03:33063856[GTGG	1	0	59
SL4.0ch03	33834201	MantaBND:201364:1:3:0:0:0:0	SL4.0CH09	50168532	BND	A	]SL4.0CH09:50168532]A	1	0	59
SL4.0ch03	33850578	MantaBND:361055:0:1:0:0:0:0	SL4.0CH03	33851767	BND	A	[SL4.0CH03:33851767[A	1	0	59
SL4.0ch03	33851767	MantaBND:361055:0:1:0:0:0:1	SL4.0CH03	33850578	BND	G	[SL4.0CH03:33850578[G	1	0	59
SL4.0ch03	34000955	MantaBND:148097:3:5:0:0:0:1	SL4.0CH07	35086982	BND	A	A]SL4.0CH07:35086982]	1	0	59
SL4.0ch03	35594479	MantaBND:128:5684:6381:0:0:0:0	SL4.0CH10	22142946	BND	A	]SL4.0CH10:22142946]A	0	1	59
SL4.0ch03	35741007	MantaBND:128:6053:6314:0:0:0:0	SL4.0CH11	43418881	BND	T	[SL4.0CH11:43418881[GTGAAGATGAAT	2	0	58
SL4.0ch03	35772536	MantaBND:128:15726:15860:0:0:0:1	SL4.0CH03	35874072	BND	T	[SL4.0CH03:35874072[T	0	1	59
SL4.0ch03	35874072	MantaBND:128:15726:15860:0:0:0:0	SL4.0CH03	35772536	BND	T	[SL4.0CH03:35772536[T	0	1	59
SL4.0ch03	36297538	MantaBND:128:17206:17332:0:0:0:0	SL4.0CH05	32923747	BND	T	]SL4.0CH05:32923747]T	1	0	59
SL4.0ch03	36550450	MantaBND:366393:0:1:0:2:0:1	SL4.0CH03	36563572	BND	A	A]SL4.0CH03:36563572]	1	2	57
SL4.0ch03	36563571	MantaBND:366393:0:1:0:2:0:0	SL4.0CH03	36550451	BND	G	G]SL4.0CH03:36550451]	1	2	57
SL4.0ch03	37609748	MantaBND:242341:0:3:0:0:0:0	SL4.0CH07	62562746	BND	C	[SL4.0CH07:62562746[C	0	0	60
SL4.0ch03	39600248	MantaBND:372661:0:2:0:0:0:1	SL4.0CH03	39602377	BND	A	[SL4.0CH03:39602377[A	0	1	59
SL4.0ch03	39602377	MantaBND:372661:0:2:0:0:0:0	SL4.0CH03	39600248	BND	T	[SL4.0CH03:39600248[T	0	1	59
SL4.0ch03	39804491	MantaBND:275757:2:3:0:0:0:0	SL4.0CH04	374270	BND	A	AA]SL4.0CH04:374270]	1	0	59
SL4.0ch03	40296739	MantaBND:128:4630:6743:0:0:0:0	SL4.0CH10	5597990	BND	A	A[SL4.0CH10:5597990[	1	0	59
SL4.0ch03	40579463	MantaBND:38769:1:2:0:0:0:0	SL4.0CH04	48662083	BND	T	[SL4.0CH04:48662083[T	1	0	59
SL4.0ch03	40598343	MantaBND:374827:0:1:2:3:0:0	SL4.0CH03	40608018	BND	C	[SL4.0CH03:40608018[C	1	0	59
SL4.0ch03	40608018	MantaBND:374827:0:1:2:3:0:1	SL4.0CH03	40598343	BND	A	[SL4.0CH03:40598343[A	1	0	59
SL4.0ch03	41089194	MantaBND:375937:0:2:0:1:0:1	SL4.0CH03	41092462	BND	C	C]SL4.0CH03:41092462]	0	1	59
SL4.0ch03	41092460	MantaBND:375937:0:2:0:1:0:0	SL4.0CH03	41089196	BND	T	T]SL4.0CH03:41089196]	0	1	59
SL4.0ch03	41488119	MantaBND:128:14171:14176:0:2:0:0	SL4.0CH02	25653876	BND	T	[SL4.0CH02:25653876[T	3	0	57
SL4.0ch03	41506390	MantaBND:376838:0:1:0:2:0:0	SL4.0CH03	41508593	BND	T	[SL4.0CH03:41508593[AAGATGTT	1	0	59
SL4.0ch03	41508593	MantaBND:376838:0:1:0:2:0:1	SL4.0CH03	41506390	BND	T	[SL4.0CH03:41506390[ACATCTTT	1	0	59
SL4.0ch03	42349808	MantaBND:128:50374:50380:0:0:0:1	SL4.0CH08	6514872	BND	C	[SL4.0CH08:6514872[C	0	1	59
SL4.0ch03	42979713	MantaBND:378918:0:1:0:0:0:1	SL4.0CH03	44014635	BND	A	[SL4.0CH03:44014635[A	1	0	59
SL4.0ch03	43723552	MantaBND:123119:1:2:1:0:0:0	SL4.0CH05	37550412	BND	T	[SL4.0CH05:37550412[T	1	0	59
SL4.0ch03	43723753	MantaBND:123119:1:2:0:0:0:1	SL4.0CH05	37550465	BND	C	C]SL4.0CH05:37550465]	2	0	58
SL4.0ch03	43858280	MantaBND:380810:0:1:0:2:0:1	SL4.0CH06	26492590	BND	C	CG]SL4.0CH06:26492590]	0	1	59
SL4.0ch03	43898074	MantaBND:380784:0:1:0:0:0:0	SL4.0CH09	45263578	BND	G	G[SL4.0CH09:45263578[	1	0	59
SL4.0ch03	44014634	MantaBND:378918:0:1:0:0:0:0	SL4.0CH03	42979714	BND	T	[SL4.0CH03:42979714[T	1	0	59
SL4.0ch03	44725100	MantaBND:128:6982:6983:0:0:0:1	SL4.0CH02	46222428	BND	G	]SL4.0CH02:46222428]G	1	0	59
SL4.0ch03	45081761	MantaBND:382626:0:1:0:0:0:1	SL4.0CH06	32335150	BND	G	G[SL4.0CH06:32335150[	1	0	59
SL4.0ch03	45102001	MantaBND:382723:0:0:7:0:0:1	SL4.0CH03	45102063	BND	T	[SL4.0CH03:45102063[T	0	2	58
SL4.0ch03	45102063	MantaBND:382723:0:0:7:0:0:0	SL4.0CH03	45102001	BND	C	[SL4.0CH03:45102001[C	0	2	58
SL4.0ch03	45314933	MantaBND:128:48539:48542:0:0:0:0	SL4.0CH11	46613945	BND	C	C]SL4.0CH11:46613945]	2	0	58
SL4.0ch03	45536700	MantaBND:128:49000:49001:0:0:0:0	SL4.0CH04	5488041	BND	A	[SL4.0CH04:5488041[A	1	0	59
SL4.0ch03	45554128	MantaBND:128:18225:18226:0:0:0:0	SL4.0CH11	413752	BND	A	ATG[SL4.0CH11:413752[	1	0	59
SL4.0ch03	45564048	MantaBND:128:26675:26676:0:0:0:1	SL4.0CH11	414401	BND	C	]SL4.0CH11:414401]AC	1	0	59
SL4.0ch03	46054277	MantaBND:128:3381:3449:0:0:0:0	SL4.0CH01	14378830	BND	A	A[SL4.0CH01:14378830[	1	0	59
SL4.0ch03	46209856	MantaBND:128:30165:30167:0:0:0:0	SL4.0CH07	45286227	BND	C	]SL4.0CH07:45286227]C	1	0	59
SL4.0ch03	46209893	MantaBND:128:30165:30166:0:1:0:0	SL4.0CH08	53803090	BND	T	[SL4.0CH08:53803090[T	0	1	59
SL4.0ch03	46210392	MantaBND:128:24119:24121:0:0:0:1	SL4.0CH07	65149587	BND	T	TAT[SL4.0CH07:65149587[	1	0	59
SL4.0ch03	46523731	MantaBND:385203:0:1:0:0:0:0	SL4.0CH03	49174374	BND	A	A]SL4.0CH03:49174374]	1	0	59
SL4.0ch03	47199359	MantaBND:152047:0:2:0:0:0:1	SL4.0CH01	74823213	BND	A	[SL4.0CH01:74823213[A	1	0	59
SL4.0ch03	47200814	MantaBND:128:11397:11400:0:0:0:0	SL4.0CH08	807450	BND	C	]SL4.0CH08:807450]C	1	0	59
SL4.0ch03	47211749	MantaBND:9227:5:6:0:1:0:1	SL4.0CH01	592982	BND	A	[SL4.0CH01:592982[A	1	0	59
SL4.0ch03	47484235	MantaBND:128:14145:14211:0:0:0:0	SL4.0CH05	24449128	BND	A	]SL4.0CH05:24449128]GAAATTCAGGAGAGAGAGTA	1	0	59
SL4.0ch03	47484243	MantaBND:128:14145:14212:0:5:0:1	SL4.0CH01	38711828	BND	G	[SL4.0CH01:38711828[CAACAAAGTTGTATTGACTG	1	0	59
SL4.0ch03	47484437	MantaBND:128:14135:14145:0:0:0:0	SL4.0CH01	79402024	BND	G	G[SL4.0CH01:79402024[	2	0	58
SL4.0ch03	47725919	MantaBND:128:8012:8013:0:2:0:0	SL4.0CH08	21998884	BND	T	T]SL4.0CH08:21998884]	1	0	59
SL4.0ch03	47804969	MantaBND:100128:2:3:0:0:0:1	SL4.0CH05	11908916	BND	T	[SL4.0CH05:11908916[T	0	0	60
SL4.0ch03	47804994	MantaBND:128:16303:16306:0:0:0:1	SL4.0CH04	57781343	BND	T	[SL4.0CH04:57781343[T	1	0	59
SL4.0ch03	48308137	MantaBND:128:5359:7224:0:0:0:0	SL4.0CH07	63957371	BND	A	[SL4.0CH07:63957371[GTA	1	0	59
SL4.0ch03	48466364	MantaBND:128:2630:7226:0:0:0:0	SL4.0CH07	1448646	BND	G	G]SL4.0CH07:1448646]	1	0	59
SL4.0ch03	49013312	MantaBND:128:24532:24533:0:0:0:0	SL4.0CH07	63532042	BND	T	T]SL4.0CH07:63532042]	1	0	59
SL4.0ch03	49089465	MantaBND:128:39664:39665:0:1:0:1	SL4.0CH10	4352714	BND	T	]SL4.0CH10:4352714]T	1	0	59
SL4.0ch03	49174374	MantaBND:385203:0:1:0:0:0:1	SL4.0CH03	46523731	BND	A	A]SL4.0CH03:46523731]	1	0	59
SL4.0ch03	49197921	MantaBND:390662:0:2:0:0:0:0	SL4.0CH12	65858263	BND	T	T]SL4.0CH12:65858263]	1	0	59
SL4.0ch03	49377687	MantaBND:203731:18:19:0:1:0:1	SL4.0CH04	56784394	BND	T	]SL4.0CH04:56784394]CT	0	1	59
SL4.0ch03	49495672	MantaBND:128:7993:25966:0:3:0:1	SL4.0CH11	50643090	BND	A	A]SL4.0CH11:50643090]	1	0	59
SL4.0ch03	49548767	MantaBND:391235:0:1:0:1:0:1	SL4.0CH11	14050635	BND	T	TTT[SL4.0CH11:14050635[	1	0	59
SL4.0ch03	49564308	MantaBND:128:7156:7158:1:1:0:0	SL4.0CH02	29217076	BND	A	[SL4.0CH02:29217076[A	1	0	59
SL4.0ch03	50468510	MantaBND:128358:0:1:0:0:0:0	SL4.0CH01	62724312	BND	A	[SL4.0CH01:62724312[A	1	0	59
SL4.0ch03	50535617	MantaBND:128:15288:15289:0:0:0:1	SL4.0CH01	55905417	BND	G	[SL4.0CH01:55905417[G	0	1	59
SL4.0ch03	50536506	MantaBND:128:5350:10642:0:0:0:1	SL4.0CH05	10572702	BND	G	G]SL4.0CH05:10572702]	2	0	58
SL4.0ch03	51216805	MantaBND:34191:5:6:0:0:0:1	SL4.0CH12	29749920	BND	T	]SL4.0CH12:29749920]T	1	0	59
SL4.0ch03	51546785	MantaBND:395237:0:2:0:0:0:1	SL4.0CH12	24386035	BND	C	]SL4.0CH12:24386035]C	1	0	59
SL4.0ch03	51595595	MantaBND:152419:0:1:0:0:0:1	SL4.0CH01	74928103	BND	A	[SL4.0CH01:74928103[ATAAACGAGACATTCATAAATA	1	0	59
SL4.0ch03	51615403	MantaBND:307429:2:6:0:0:0:1	SL4.0CH10	50534247	BND	G	]SL4.0CH10:50534247]G	1	0	59
SL4.0ch03	51801803	MantaBND:128:42215:42242:0:0:0:1	SL4.0CH06	32266717	BND	A	A[SL4.0CH06:32266717[	1	0	59
SL4.0ch03	52353700	MantaBND:396935:0:1:0:0:0:0	SL4.0CH04	3392777	BND	T	[SL4.0CH04:3392777[T	1	0	59
SL4.0ch03	52433146	MantaBND:397162:0:1:0:0:0:1	SL4.0CH09	65659154	BND	T	T]SL4.0CH09:65659154]	1	0	59
SL4.0ch03	52973757	MantaBND:397870:0:1:0:9:0:0	SL4.0CH05	17081439	BND	T	T]SL4.0CH05:17081439]	1	0	59
SL4.0ch03	52973786	MantaBND:397870:0:2:0:6:0:0	SL4.0CH05	17081283	BND	T	[SL4.0CH05:17081283[GT	1	0	59
SL4.0ch03	53619029	MantaBND:399297:0:1:0:0:0:1	SL4.0CH09	19321288	BND	A	]SL4.0CH09:19321288]A	1	0	59
SL4.0ch03	54079633	MantaBND:400278:0:2:0:4:0:1	SL4.0CH06	8773686	BND	T	]SL4.0CH06:8773686]T	2	0	58
SL4.0ch03	54145774	MantaBND:123:1565:3626:0:0:0:1	SL4.0CH06	18872337	BND	T	]SL4.0CH06:18872337]T	0	0	60
SL4.0ch03	54145799	MantaBND:26:3995:4009:0:0:0:1	SL4.0CH06	20146588	BND	T	]SL4.0CH06:20146588]T	0	0	60
SL4.0ch03	54145816	MantaBND:123:1565:3635:0:0:0:1	SL4.0CH06	17403808	BND	A	[SL4.0CH06:17403808[A	0	0	60
SL4.0ch03	54197843	MantaBND:128:31710:31711:0:2:0:1	SL4.0CH06	23442038	BND	C	[SL4.0CH06:23442038[C	1	0	59
SL4.0ch03	54198755	MantaBND:128:31708:31712:0:6:0:0	SL4.0CH12	61723255	BND	G	G[SL4.0CH12:61723255[	1	0	59
SL4.0ch03	54279582	MantaBND:128:23441:23519:0:0:0:1	SL4.0CH11	39671497	BND	T	T[SL4.0CH11:39671497[	1	0	59
SL4.0ch03	54835335	MantaBND:402117:0:1:0:0:0:1	SL4.0CH10	50579693	BND	A	[SL4.0CH10:50579693[A	2	0	58
SL4.0ch03	55307433	MantaBND:345444:3:4:0:8:0:1	SL4.0CH12	38624722	BND	C	C]SL4.0CH12:38624722]	2	0	58
SL4.0ch03	55988853	MantaBND:404339:0:1:0:1:0:1	SL4.0CH11	7571975	BND	T	TGA]SL4.0CH11:7571975]	0	1	59
SL4.0ch03	56106372	MantaBND:162557:0:1:1:0:0:1	SL4.0CH01	79255956	BND	T	T[SL4.0CH01:79255956[	1	0	59
SL4.0ch03	56245606	MantaBND:128:11450:11452:0:0:0:0	SL4.0CH10	56348431	BND	G	G]SL4.0CH10:56348431]	1	0	59
SL4.0ch03	56291467	MantaBND:128:7334:7336:0:6:0:0	SL4.0CH04	55228826	BND	C	[SL4.0CH04:55228826[TATTGAGAGACTTACGCACGATGGAGCAACC	2	0	58
SL4.0ch03	56559001	MantaBND:128:38421:38425:0:0:0:1	SL4.0CH02	48051752	BND	G	G[SL4.0CH02:48051752[	1	0	59
SL4.0ch03	57005980	MantaBND:406241:0:1:0:5:0:0	SL4.0CH11	48112601	BND	G	[SL4.0CH11:48112601[G	1	0	59
SL4.0ch03	57318075	MantaBND:108199:0:1:0:0:0:0	SL4.0CH01	52482367	BND	A	A[SL4.0CH01:52482367[	1	0	59
SL4.0ch03	58104509	MantaBND:408881:0:1:0:3:0:1	SL4.0CH06	39441089	BND	T	[SL4.0CH06:39441089[T	1	0	59
SL4.0ch03	59307833	MantaBND:128:50887:50889:0:3:0:0	SL4.0CH09	50922316	BND	C	C]SL4.0CH09:50922316]	1	0	59
SL4.0ch03	59338279	MantaBND:128:17384:17386:0:4:0:0	SL4.0CH04	61210017	BND	A	[SL4.0CH04:61210017[A	1	0	59
SL4.0ch03	59568852	MantaBND:128:13313:13314:0:0:0:0	SL4.0CH06	38703049	BND	T	T[SL4.0CH06:38703049[	1	0	59
SL4.0ch03	60382885	MantaBND:414051:0:1:0:0:0:0	SL4.0CH03	60383296	BND	G	G]SL4.0CH03:60383296]	1	0	59
SL4.0ch03	60383289	MantaBND:414051:0:1:0:0:0:1	SL4.0CH03	60382892	BND	A	A]SL4.0CH03:60382892]	1	0	59
SL4.0ch03	60528589	MantaBND:189440:0:2:0:1:0:0	SL4.0CH06	11211474	BND	A	[SL4.0CH06:11211474[A	0	0	60
SL4.0ch03	60899122	MantaBND:86283:1:2:0:0:0:0	SL4.0CH01	42005839	BND	T	T]SL4.0CH01:42005839]	1	0	59
SL4.0ch03	61573153	MantaBND:104440:1:2:0:0:0:1	SL4.0CH11	11864336	BND	T	T]SL4.0CH11:11864336]	1	0	59
SL4.0ch03	62154553	MantaBND:418173:1:2:3:0:0:1	SL4.0CH03	62260452	BND	G	G]SL4.0CH03:62260452]	1	0	59
SL4.0ch03	62154997	MantaBND:418173:1:2:0:0:0:0	SL4.0CH03	62260460	BND	T	T]SL4.0CH03:62260460]	1	0	59
SL4.0ch03	62155738	MantaBND:418173:0:1:0:0:0:0	SL4.0CH03	62260005	BND	G	[SL4.0CH03:62260005[G	1	0	59
SL4.0ch03	62260005	MantaBND:418173:0:1:0:0:0:1	SL4.0CH03	62155738	BND	A	[SL4.0CH03:62155738[A	1	0	59
SL4.0ch03	62260452	MantaBND:418173:1:2:3:0:0:0	SL4.0CH03	62154553	BND	T	T]SL4.0CH03:62154553]	1	0	59
SL4.0ch03	62260460	MantaBND:418173:1:2:0:0:0:1	SL4.0CH03	62154997	BND	C	C]SL4.0CH03:62154997]	1	0	59
SL4.0ch03	62453206	MantaBND:128:36100:36101:0:0:0:1	SL4.0CH01	70861035	BND	G	G[SL4.0CH01:70861035[	1	0	59
SL4.0ch03	63125911	MantaBND:420251:0:3:0:0:0:1	SL4.0CH08	53250696	BND	A	[SL4.0CH08:53250696[A	2	0	58
SL4.0ch03	63532602	MantaBND:280997:0:1:0:1:0:0	SL4.0CH02	46989687	BND	G	[SL4.0CH02:46989687[G	1	0	59
SL4.0ch03	63938863	MantaBND:128:10818:10824:0:0:0:1	SL4.0CH01	1130210	BND	G	[SL4.0CH01:1130210[G	1	0	59
SL4.0ch03	64702208	MantaBND:424101:0:2:0:0:0:0	SL4.0CH05	60491008	BND	T	T[SL4.0CH05:60491008[	1	0	59
SL4.0ch03	64908615	MantaBND:424366:0:1:0:0:0:1	SL4.0CH09	51469265	BND	C	]SL4.0CH09:51469265]C	1	0	59
SL4.0ch03	64988326	MantaBND:128:14087:14088:1:4:0:0	SL4.0CH03	64988845	BND	T	[SL4.0CH03:64988845[T	1	0	59
SL4.0ch03	64988841	MantaBND:128:14087:14088:1:4:0:1	SL4.0CH03	64988330	BND	A	[SL4.0CH03:64988330[A	1	0	59
SL4.0ch04	61219	MantaBND:128:25847:25848:0:1:0:0	SL4.0CH12	43931342	BND	T	[SL4.0CH12:43931342[CATTGAACTAGCAGAATTTTCCTAAGATTACACAAT	3	0	57
SL4.0ch04	92128	MantaBND:425340:0:1:0:0:0:1	SL4.0CH04	96172	BND	T	T]SL4.0CH04:96172]	1	0	59
SL4.0ch04	96172	MantaBND:425340:0:1:0:0:0:0	SL4.0CH04	92128	BND	T	T]SL4.0CH04:92128]	1	0	59
SL4.0ch04	374270	MantaBND:275757:2:3:0:0:0:1	SL4.0CH03	39804491	BND	G	GT]SL4.0CH03:39804491]	1	0	59
SL4.0ch04	497372	MantaBND:128:23128:25276:0:0:0:1	SL4.0CH08	4130224	BND	A	A]SL4.0CH08:4130224]	1	0	59
SL4.0ch04	554884	MantaBND:128:46891:46894:0:5:0:0	SL4.0CH04	3042025	BND	G	G]SL4.0CH04:3042025]	1	0	59
SL4.0ch04	1494679	MantaBND:128:48449:48450:0:0:0:0	SL4.0CH04	1495776	BND	T	T]SL4.0CH04:1495776]	1	0	59
SL4.0ch04	1495549	MantaBND:128:48450:48450:9:0:0:1	SL4.0CH04	1495952	BND	G	[SL4.0CH04:1495952[CG	0	1	59
SL4.0ch04	1495776	MantaBND:128:48449:48450:0:0:0:1	SL4.0CH04	1494679	BND	A	A]SL4.0CH04:1494679]	1	0	59
SL4.0ch04	1495952	MantaBND:128:48450:48450:9:0:0:0	SL4.0CH04	1495549	BND	A	[SL4.0CH04:1495549[GA	0	1	59
SL4.0ch04	1506831	MantaBND:428705:0:1:0:1:0:0	SL4.0CH09	14337037	BND	A	[SL4.0CH09:14337037[TGTA	1	0	59
SL4.0ch04	2523376	MantaBND:128:7849:7850:0:0:0:0	SL4.0CH10	12590485	BND	A	]SL4.0CH10:12590485]CA	2	0	58
SL4.0ch04	2524645	MantaBND:128:7849:7855:0:0:0:1	SL4.0CH01	77097442	BND	T	T[SL4.0CH01:77097442[	1	0	59
SL4.0ch04	2613894	MantaBND:373960:3:4:1:0:0:1	SL4.0CH06	1943865	BND	T	[SL4.0CH06:1943865[T	1	0	59
SL4.0ch04	2614199	MantaBND:373960:3:4:0:0:0:1	SL4.0CH06	1943780	BND	A	A]SL4.0CH06:1943780]	1	0	59
SL4.0ch04	2765855	MantaBND:128:37802:37803:0:0:0:1	SL4.0CH07	47224305	BND	T	T[SL4.0CH07:47224305[	1	0	59
SL4.0ch04	2822201	MantaBND:128:36391:36393:0:0:0:1	SL4.0CH11	38786854	BND	T	]SL4.0CH11:38786854]T	1	0	59
SL4.0ch04	2822429	MantaBND:128:36390:36391:0:7:0:0	SL4.0CH05	6084471	BND	T	[SL4.0CH05:6084471[TT	1	0	59
SL4.0ch04	2864517	MantaBND:52961:0:1:0:3:0:1	SL4.0CH01	24173643	BND	G	GCG[SL4.0CH01:24173643[	1	0	59
SL4.0ch04	3042024	MantaBND:128:46891:46894:0:5:0:1	SL4.0CH04	554885	BND	T	T]SL4.0CH04:554885]	1	0	59
SL4.0ch04	3392777	MantaBND:396935:0:1:0:0:0:1	SL4.0CH03	52353700	BND	A	[SL4.0CH03:52353700[A	1	0	59
SL4.0ch04	4211047	MantaBND:128:1838:3088:0:0:0:1	SL4.0CH12	62209167	BND	G	]SL4.0CH12:62209167]G	1	0	59
SL4.0ch04	4211630	MantaBND:128:10395:10397:0:0:0:1	SL4.0CH04	7303996	BND	T	[SL4.0CH04:7303996[T	3	0	57
SL4.0ch04	4422093	MantaBND:435251:0:1:0:2:0:0	SL4.0CH11	39672000	BND	G	]SL4.0CH11:39672000]G	1	0	59
SL4.0ch04	4498095	MantaBND:435426:3:4:0:2:0:0	SL4.0CH04	4501202	BND	C	C]SL4.0CH04:4501202]	1	0	59
SL4.0ch04	4501198	MantaBND:435426:3:4:0:2:0:1	SL4.0CH04	4498099	BND	T	T]SL4.0CH04:4498099]	1	0	59
SL4.0ch04	5184028	MantaBND:128:50975:50987:0:0:0:0	SL4.0CH04	5238395	BND	A	ATACATACAT]SL4.0CH04:5238395]	1	2	57
SL4.0ch04	5184776	MantaBND:156210:0:1:0:0:0:0	SL4.0CH02	36743010	BND	T	T]SL4.0CH02:36743010]	0	0	60
SL4.0ch04	5238395	MantaBND:128:50975:50987:0:0:0:1	SL4.0CH04	5184028	BND	T	TATGTATGTA]SL4.0CH04:5184028]	1	2	57
SL4.0ch04	5296843	MantaBND:143:5103:5195:0:0:0:0	SL4.0CH12	62568450	BND	T	]SL4.0CH12:62568450]T	0	0	60
SL4.0ch04	5488041	MantaBND:128:49000:49001:0:0:0:1	SL4.0CH03	45536700	BND	T	[SL4.0CH03:45536700[T	1	0	59
SL4.0ch04	5490073	MantaBND:128:48986:49003:0:0:0:1	SL4.0CH11	48894039	BND	G	G[SL4.0CH11:48894039[	1	0	59
SL4.0ch04	5658037	MantaBND:437763:0:0:8:0:0:0	SL4.0CH04	5658364	BND	C	[SL4.0CH04:5658364[C	1	0	59
SL4.0ch04	5658364	MantaBND:437763:0:0:8:0:0:1	SL4.0CH04	5658037	BND	T	[SL4.0CH04:5658037[T	1	0	59
SL4.0ch04	6527822	MantaBND:128:13251:13313:0:0:0:0	SL4.0CH06	38703107	BND	A	ATACT[SL4.0CH06:38703107[	0	1	59
SL4.0ch04	7297258	MantaBND:128:21383:21390:0:0:0:1	SL4.0CH12	55148120	BND	C	C[SL4.0CH12:55148120[	2	0	58
SL4.0ch04	7303996	MantaBND:128:10395:10397:0:0:0:0	SL4.0CH04	4211630	BND	T	[SL4.0CH04:4211630[T	3	0	57
SL4.0ch04	7451524	MantaBND:281076:0:1:0:0:0:1	SL4.0CH12	582699	BND	T	]SL4.0CH12:582699]T	0	0	60
SL4.0ch04	7727262	MantaBND:441331:0:1:0:0:0:0	SL4.0CH12	15518890	BND	T	]SL4.0CH12:15518890]T	1	0	59
SL4.0ch04	7866787	MantaBND:128:16179:16185:0:4:0:1	SL4.0CH05	1148286	BND	T	]SL4.0CH05:1148286]T	1	0	59
SL4.0ch04	8008929	MantaBND:441698:0:1:0:0:0:0	SL4.0CH05	18035927	BND	A	[SL4.0CH05:18035927[A	1	0	59
SL4.0ch04	8373432	MantaBND:442413:0:1:0:0:0:0	SL4.0CH07	27726327	BND	A	A[SL4.0CH07:27726327[	0	1	59
SL4.0ch04	9350610	MantaBND:128:8029:8030:0:4:0:0	SL4.0CH06	18395858	BND	T	T[SL4.0CH06:18395858[	0	2	58
SL4.0ch04	10307983	MantaBND:36396:0:1:0:0:0:1	SL4.0CH01	14305296	BND	A	A]SL4.0CH01:14305296]	1	0	59
SL4.0ch04	10347924	MantaBND:128:54016:54026:0:0:0:1	SL4.0CH12	60485982	BND	A	A]SL4.0CH12:60485982]	1	0	59
SL4.0ch04	11739445	MantaBND:200900:6:7:0:0:0:1	SL4.0CH12	42480424	BND	A	[SL4.0CH12:42480424[A	0	0	60
SL4.0ch04	11944161	MantaBND:128:52148:52149:0:0:0:0	SL4.0CH11	784966	BND	A	[SL4.0CH11:784966[A	1	0	59
SL4.0ch04	12328948	MantaBND:226156:0:3:0:0:0:0	SL4.0CH06	16829075	BND	A	A]SL4.0CH06:16829075]	0	0	60
SL4.0ch04	12328950	MantaBND:257451:0:1:0:0:0:0	SL4.0CH06	16829080	BND	T	T]SL4.0CH06:16829080]	0	0	60
SL4.0ch04	12333897	MantaBND:128:8077:8144:0:0:0:0	SL4.0CH11	3212589	BND	A	[SL4.0CH11:3212589[TA	1	0	59
SL4.0ch04	12487378	MantaBND:128:19583:19584:0:0:0:1	SL4.0CH04	12495768	BND	G	G]SL4.0CH04:12495768]	0	1	59
SL4.0ch04	12487413	MantaBND:128:19583:19584:1:0:0:0	SL4.0CH04	12495937	BND	G	[SL4.0CH04:12495937[G	0	1	59
SL4.0ch04	12495766	MantaBND:128:19583:19584:0:0:0:0	SL4.0CH04	12487380	BND	A	A]SL4.0CH04:12487380]	0	1	59
SL4.0ch04	12495937	MantaBND:128:19583:19584:1:0:0:1	SL4.0CH04	12487413	BND	C	[SL4.0CH04:12487413[C	0	1	59
SL4.0ch04	14143340	MantaBND:56148:1:4:0:0:0:1	SL4.0CH11	39176599	BND	A	[SL4.0CH11:39176599[A	1	0	59
SL4.0ch04	15961156	MantaBND:455206:0:1:0:0:0:1	SL4.0CH04	16359775	BND	C	C]SL4.0CH04:16359775]	1	0	59
SL4.0ch04	16359774	MantaBND:455206:0:1:0:0:0:0	SL4.0CH04	15961157	BND	C	C]SL4.0CH04:15961157]	1	0	59
SL4.0ch04	16425839	MantaBND:128:54868:54875:0:0:0:1	SL4.0CH12	60808571	BND	A	[SL4.0CH12:60808571[A	1	0	59
SL4.0ch04	16484508	MantaBND:455997:0:2:0:0:0:1	SL4.0CH04	16488975	BND	G	[SL4.0CH04:16488975[G	1	0	59
SL4.0ch04	16488975	MantaBND:455997:0:2:0:0:0:0	SL4.0CH04	16484508	BND	T	[SL4.0CH04:16484508[T	1	0	59
SL4.0ch04	16750761	MantaBND:456763:0:2:0:0:0:0	SL4.0CH04	16950083	BND	T	[SL4.0CH04:16950083[T	1	0	59
SL4.0ch04	16750816	MantaBND:456763:0:1:0:0:0:1	SL4.0CH04	16854707	BND	T	T]SL4.0CH04:16854707]	1	0	59
SL4.0ch04	16854707	MantaBND:456763:0:1:0:0:0:0	SL4.0CH04	16750816	BND	A	A]SL4.0CH04:16750816]	1	0	59
SL4.0ch04	16863439	MantaBND:212241:4:5:1:1:0:1	SL4.0CH04	16863757	BND	A	A]SL4.0CH04:16863757]	1	0	59
SL4.0ch04	16863757	MantaBND:212241:4:5:1:1:0:0	SL4.0CH04	16863439	BND	G	G]SL4.0CH04:16863439]	1	0	59
SL4.0ch04	16950083	MantaBND:456763:0:2:0:0:0:1	SL4.0CH04	16750761	BND	A	[SL4.0CH04:16750761[A	1	0	59
SL4.0ch04	17631418	MantaBND:458876:0:2:0:0:0:1	SL4.0CH10	63078897	BND	A	[SL4.0CH10:63078897[A	1	0	59
SL4.0ch04	17930499	MantaBND:128:35588:35599:0:0:0:1	SL4.0CH01	52688937	BND	T	]SL4.0CH01:52688937]GCCACGGGCCTTCTCCATCTAGT	1	0	59
SL4.0ch04	18177528	MantaBND:460054:0:1:0:0:0:0	SL4.0CH04	18177767	BND	C	[SL4.0CH04:18177767[C	2	0	58
SL4.0ch04	18177767	MantaBND:460054:0:1:0:0:0:1	SL4.0CH04	18177528	BND	C	[SL4.0CH04:18177528[C	2	0	58
SL4.0ch04	18518817	MantaBND:53208:9:10:0:0:0:1	SL4.0CH09	45090637	BND	A	A]SL4.0CH09:45090637]	1	0	59
SL4.0ch04	18621686	MantaBND:461038:0:1:0:0:0:0	SL4.0CH08	57883617	BND	G	G[SL4.0CH08:57883617[	1	0	59
SL4.0ch04	18621688	MantaBND:461038:0:2:0:0:0:0	SL4.0CH11	1808539	BND	A	[SL4.0CH11:1808539[A	1	0	59
SL4.0ch04	18736252	MantaBND:128:40083:40084:0:0:0:1	SL4.0CH10	8907218	BND	A	A[SL4.0CH10:8907218[	1	0	59
SL4.0ch04	18827825	MantaBND:128:35316:35317:0:0:0:1	SL4.0CH04	18828504	BND	A	[SL4.0CH04:18828504[A	1	0	59
SL4.0ch04	18828504	MantaBND:128:35316:35317:0:0:0:0	SL4.0CH04	18827825	BND	A	[SL4.0CH04:18827825[A	1	0	59
SL4.0ch04	18926897	MantaBND:128:49117:49123:0:3:0:1	SL4.0CH10	11565274	BND	T	[SL4.0CH10:11565274[T	1	0	59
SL4.0ch04	18971126	MantaBND:461676:0:1:0:4:0:0	SL4.0CH04	18973621	BND	T	T]SL4.0CH04:18973621]	2	0	58
SL4.0ch04	18973621	MantaBND:461676:0:1:0:4:0:1	SL4.0CH04	18971126	BND	T	T]SL4.0CH04:18971126]	2	0	58
SL4.0ch04	19932542	MantaBND:128:36268:36269:0:0:0:0	SL4.0CH09	50652848	BND	T	T]SL4.0CH09:50652848]	1	0	59
SL4.0ch04	20554044	MantaBND:465330:0:1:0:2:0:0	SL4.0CH05	26899557	BND	A	ATAATATC]SL4.0CH05:26899557]	1	0	59
SL4.0ch04	20644682	MantaBND:40795:2:3:0:1:0:0	SL4.0CH06	13618516	BND	T	]SL4.0CH06:13618516]T	1	0	59
SL4.0ch04	20732596	MantaBND:465533:0:1:0:2:0:0	SL4.0CH04	20739934	BND	A	A]SL4.0CH04:20739934]	1	1	58
SL4.0ch04	20739640	MantaBND:465501:0:1:0:0:0:0	SL4.0CH04	20748563	BND	G	[SL4.0CH04:20748563[G	0	1	59
SL4.0ch04	20739928	MantaBND:465533:0:1:0:2:0:1	SL4.0CH04	20732602	BND	G	G]SL4.0CH04:20732602]	1	1	58
SL4.0ch04	20748563	MantaBND:465501:0:1:0:0:0:1	SL4.0CH04	20739640	BND	G	[SL4.0CH04:20739640[G	0	1	59
SL4.0ch04	21013113	MantaBND:128:48166:48197:0:1:0:0	SL4.0CH07	53982939	BND	A	[SL4.0CH07:53982939[A	1	0	59
SL4.0ch04	21013222	MantaBND:128:48166:48202:0:0:0:1	SL4.0CH03	1666788	BND	G	G[SL4.0CH03:1666788[	1	0	59
SL4.0ch04	21926076	MantaBND:128:9538:9542:0:0:0:0	SL4.0CH01	32503874	BND	C	]SL4.0CH01:32503874]C	1	0	59
SL4.0ch04	21926090	MantaBND:128:9542:9577:0:0:0:1	SL4.0CH12	5486430	BND	C	[SL4.0CH12:5486430[C	1	0	59
SL4.0ch04	21929627	MantaBND:128:9583:9595:0:1:0:1	SL4.0CH11	30271602	BND	G	G[SL4.0CH11:30271602[	1	0	59
SL4.0ch04	22598083	MantaBND:120504:0:1:0:1:0:0	SL4.0CH01	58512935	BND	G	]SL4.0CH01:58512935]TG	0	2	58
SL4.0ch04	22683988	MantaBND:376942:1:2:1:0:0:0	SL4.0CH04	22684296	BND	C	C]SL4.0CH04:22684296]	2	0	58
SL4.0ch04	22684296	MantaBND:376942:1:2:1:0:0:1	SL4.0CH04	22683988	BND	C	C]SL4.0CH04:22683988]	2	0	58
SL4.0ch04	23544243	MantaBND:471162:0:1:0:0:0:1	SL4.0CH07	67317870	BND	C	]SL4.0CH07:67317870]C	1	0	59
SL4.0ch04	24506183	MantaBND:128:2102:2336:0:0:0:1	SL4.0CH01	24354917	BND	A	[SL4.0CH01:24354917[A	0	1	59
SL4.0ch04	24671332	MantaBND:56894:2:4:0:6:0:1	SL4.0CH04	28048751	BND	C	[SL4.0CH04:28048751[C	1	0	59
SL4.0ch04	25100294	MantaBND:474622:0:1:1:0:0:0	SL4.0CH12	5930018	BND	A	[SL4.0CH12:5930018[A	1	0	59
SL4.0ch04	25100573	MantaBND:474622:0:1:0:0:0:0	SL4.0CH12	5929921	BND	G	G]SL4.0CH12:5929921]	1	0	59
SL4.0ch04	25662144	MantaBND:242262:0:1:0:0:0:0	SL4.0CH08	37430566	BND	T	[SL4.0CH08:37430566[T,[SL4.0CH08:37430569[T	0	0	60
SL4.0ch04	26056473	MantaBND:226760:1:2:0:0:0:1	SL4.0CH04	26140546	BND	A	A]SL4.0CH04:26140546]	1	0	59
SL4.0ch04	26140546	MantaBND:226760:1:2:0:0:0:0	SL4.0CH04	26056473	BND	G	G]SL4.0CH04:26056473]	1	0	59
SL4.0ch04	26961366	MantaBND:86595:12:13:0:0:0:0	SL4.0CH05	24035843	BND	G	G[SL4.0CH05:24035843[	1	0	59
SL4.0ch04	28048748	MantaBND:56894:2:4:0:6:0:0	SL4.0CH04	24671335	BND	T	[SL4.0CH04:24671335[T	1	0	59
SL4.0ch04	28246667	MantaBND:128:28661:28662:0:0:0:1	SL4.0CH09	47845833	BND	C	[SL4.0CH09:47845833[C	1	0	59
SL4.0ch04	28560605	MantaBND:309132:0:1:0:0:0:1	SL4.0CH03	5938014	BND	A	[SL4.0CH03:5938014[A	1	0	59
SL4.0ch04	28641761	MantaBND:481968:0:1:0:2:0:1	SL4.0CH04	28723138	BND	A	[SL4.0CH04:28723138[A	0	3	57
SL4.0ch04	28723132	MantaBND:481968:0:1:0:2:0:0	SL4.0CH04	28641767	BND	A	[SL4.0CH04:28641767[A	0	3	57
SL4.0ch04	28794100	MantaBND:128:2547:2548:0:0:0:0	SL4.0CH01	53774560	BND	A	]SL4.0CH01:53774560]A	1	0	59
SL4.0ch04	28946871	MantaBND:128:32025:32025:6:0:0:1	SL4.0CH04	28947266	BND	T	[SL4.0CH04:28947266[T	1	0	59
SL4.0ch04	28946925	MantaBND:128:32025:32025:5:0:0:0	SL4.0CH04	28947132	BND	G	G]SL4.0CH04:28947132]	1	0	59
SL4.0ch04	28947131	MantaBND:128:32025:32025:5:0:0:1	SL4.0CH04	28946926	BND	A	A]SL4.0CH04:28946926]	1	0	59
SL4.0ch04	28947265	MantaBND:128:32025:32025:6:0:0:0	SL4.0CH04	28946872	BND	A	[SL4.0CH04:28946872[A	1	0	59
SL4.0ch04	28952148	MantaBND:228512:0:1:0:0:0:0	SL4.0CH02	20765185	BND	A	[SL4.0CH02:20765185[A	1	0	59
SL4.0ch04	29486471	MantaBND:483710:0:0:11:0:0:1	SL4.0CH04	29487065	BND	A	AATA]SL4.0CH04:29487065]	0	2	58
SL4.0ch04	29486478	MantaBND:483710:0:0:14:0:0:0	SL4.0CH04	29487041	BND	A	[SL4.0CH04:29487041[A	2	0	58
SL4.0ch04	29487041	MantaBND:483710:0:0:14:0:0:1	SL4.0CH04	29486478	BND	T	[SL4.0CH04:29486478[T	2	0	58
SL4.0ch04	29487065	MantaBND:483710:0:0:11:0:0:0	SL4.0CH04	29486471	BND	T	TTAT]SL4.0CH04:29486471]	0	2	58
SL4.0ch04	29739980	MantaBND:231653:1:2:0:0:0:1	SL4.0CH09	14627161	BND	T	]SL4.0CH09:14627161]T	1	0	59
SL4.0ch04	29780791	MantaBND:484460:0:2:0:0:0:0	SL4.0CH04	29789454	BND	C	[SL4.0CH04:29789454[C	1	0	59
SL4.0ch04	29787109	MantaBND:484457:0:1:0:0:0:1	SL4.0CH07	67555321	BND	T	]SL4.0CH07:67555321]T	1	0	59
SL4.0ch04	29789454	MantaBND:484460:0:2:0:0:0:1	SL4.0CH04	29780791	BND	T	[SL4.0CH04:29780791[T	1	0	59
SL4.0ch04	29789586	MantaBND:484460:1:3:0:0:0:1	SL4.0CH04	59214436	BND	C	C]SL4.0CH04:59214436]	1	0	59
SL4.0ch04	29971176	MantaBND:281313:0:1:1:0:0:0	SL4.0CH09	22501886	BND	A	]SL4.0CH09:22501886]A	0	0	60
SL4.0ch04	30587669	MantaBND:399297:1:2:0:0:0:1	SL4.0CH09	19321167	BND	A	A[SL4.0CH09:19321167[	1	0	59
SL4.0ch04	30987825	MantaBND:128:49709:49714:0:0:0:1	SL4.0CH03	14033819	BND	T	]SL4.0CH03:14033819]T	1	0	59
SL4.0ch04	31020646	MantaBND:128:22382:22383:0:0:0:1	SL4.0CH02	5408007	BND	T	T[SL4.0CH02:5408007[	0	0	60
SL4.0ch04	31020647	MantaBND:104213:0:1:0:0:0:1	SL4.0CH02	5408007	BND	C	C[SL4.0CH02:5408007[	0	0	60
SL4.0ch04	31691160	MantaBND:128:14368:14369:0:3:0:0	SL4.0CH06	26120046	BND	C	C[SL4.0CH06:26120046[	1	0	59
SL4.0ch04	31711356	MantaBND:488116:0:1:0:0:0:1	SL4.0CH04	31726079	BND	T	T]SL4.0CH04:31726079]	0	2	58
SL4.0ch04	31725968	MantaBND:488116:0:0:3:2:0:1	SL4.0CH04	31726082	BND	T	[SL4.0CH04:31726082[AT	0	2	58
SL4.0ch04	31726078	MantaBND:488116:0:1:0:0:0:0	SL4.0CH04	31711357	BND	A	A]SL4.0CH04:31711357]	0	2	58
SL4.0ch04	31726082	MantaBND:488116:0:0:3:2:0:0	SL4.0CH04	31725968	BND	T	[SL4.0CH04:31725968[TT	0	2	58
SL4.0ch04	32650426	MantaBND:90199:0:1:0:0:0:1	SL4.0CH01	43692398	BND	A	A[SL4.0CH01:43692398[	1	0	59
SL4.0ch04	32673451	MantaBND:128:16287:27500:0:0:0:1	SL4.0CH08	45134339	BND	C	]SL4.0CH08:45134339]C	2	0	58
SL4.0ch04	33078161	MantaBND:102208:0:1:0:0:0:0	SL4.0CH01	49907240	BND	A	]SL4.0CH01:49907240]A	1	0	59
SL4.0ch04	33667540	MantaBND:493074:0:1:0:0:0:0	SL4.0CH04	33671925	BND	T	TGA]SL4.0CH04:33671925]	1	0	59
SL4.0ch04	33671925	MantaBND:493074:0:1:0:0:0:1	SL4.0CH04	33667540	BND	C	CTC]SL4.0CH04:33667540]	1	0	59
SL4.0ch04	34922652	MantaBND:495592:0:1:0:1:0:0	SL4.0CH09	61397490	BND	G	[SL4.0CH09:61397490[G	1	0	59
SL4.0ch04	34923149	MantaBND:495592:1:2:0:0:0:1	SL4.0CH09	61397488	BND	T	T]SL4.0CH09:61397488]	1	0	59
SL4.0ch04	35985788	MantaBND:498281:0:1:0:1:0:1	SL4.0CH04	37863375	BND	T	[SL4.0CH04:37863375[T	1	0	59
SL4.0ch04	36623757	MantaBND:128:16300:16321:0:0:0:1	SL4.0CH11	20924983	BND	C	C[SL4.0CH11:20924983[	1	0	59
SL4.0ch04	37033630	MantaBND:500609:0:0:2:0:0:1	SL4.0CH04	37033827	BND	T	[SL4.0CH04:37033827[T	1	0	59
SL4.0ch04	37033827	MantaBND:500609:0:0:2:0:0:0	SL4.0CH04	37033630	BND	A	[SL4.0CH04:37033630[A	1	0	59
SL4.0ch04	37464835	MantaBND:501501:0:1:0:0:0:0	SL4.0CH10	60638373	BND	A	A[SL4.0CH10:60638373[	1	0	59
SL4.0ch04	37576225	MantaBND:267570:0:1:0:5:0:0	SL4.0CH02	41168124	BND	C	]SL4.0CH02:41168124]C	1	0	59
SL4.0ch04	37615002	MantaBND:128:2032:8763:0:0:0:1	SL4.0CH09	38041665	BND	A	A]SL4.0CH09:38041665]	1	0	59
SL4.0ch04	37863375	MantaBND:498281:0:1:0:1:0:0	SL4.0CH04	35985788	BND	C	[SL4.0CH04:35985788[C	1	0	59
SL4.0ch04	39927863	MantaBND:506473:0:1:0:0:0:1	SL4.0CH07	49218756	BND	C	]SL4.0CH07:49218756]C	1	0	59
SL4.0ch04	40569035	MantaBND:507370:0:1:0:0:0:1	SL4.0CH10	60466018	BND	T	]SL4.0CH10:60466018]T	1	0	59
SL4.0ch04	40569044	MantaBND:507370:0:3:0:0:0:1	SL4.0CH10	60462198	BND	T	TTTTTTTTTTAA[SL4.0CH10:60462198[	1	0	59
SL4.0ch04	40751352	MantaBND:507888:0:1:0:0:0:0	SL4.0CH09	31887989	BND	A	A[SL4.0CH09:31887989[	1	0	59
SL4.0ch04	40991086	MantaBND:508359:0:1:0:0:0:1	SL4.0CH12	57787131	BND	T	]SL4.0CH12:57787131]T	2	0	58
SL4.0ch04	41047260	MantaBND:128:14492:14494:0:0:0:0	SL4.0CH06	2958957	BND	T	T]SL4.0CH06:2958957]	1	0	59
SL4.0ch04	41056696	MantaBND:508484:1:3:1:2:0:0	SL4.0CH04	41065970	BND	T	[SL4.0CH04:41065970[TGATCCT	1	0	59
SL4.0ch04	41065970	MantaBND:508484:1:3:1:2:0:1	SL4.0CH04	41056696	BND	A	[SL4.0CH04:41056696[GGATCAA	1	0	59
SL4.0ch04	41790704	MantaBND:128:10557:10560:0:0:0:1	SL4.0CH06	46165847	BND	G	G]SL4.0CH06:46165847]	2	0	58
SL4.0ch04	41987079	MantaBND:64055:21:26:0:1:0:0	SL4.0CH04	41989665	BND	G	[SL4.0CH04:41989665[GAG	1	0	59
SL4.0ch04	41989665	MantaBND:64055:21:26:0:1:0:1	SL4.0CH04	41987079	BND	T	[SL4.0CH04:41987079[TCT	1	0	59
SL4.0ch04	42862613	MantaBND:512200:0:1:0:0:0:0	SL4.0CH08	37175222	BND	T	[SL4.0CH08:37175222[T	1	0	59
SL4.0ch04	42878465	MantaBND:150350:11:12:0:0:0:0	SL4.0CH11	48315000	BND	G	G[SL4.0CH11:48315000[	0	0	60
SL4.0ch04	42878484	MantaBND:312408:1:3:0:0:0:1	SL4.0CH11	48315010	BND	G	G[SL4.0CH11:48315010[	0	0	60
SL4.0ch04	42878498	MantaBND:235998:1:2:0:0:0:1	SL4.0CH11	48315002	BND	G	G[SL4.0CH11:48315002[	0	0	60
SL4.0ch04	43986533	MantaBND:143:9859:9868:0:0:0:0	SL4.0CH05	54847917	BND	A	[SL4.0CH05:54847917[A	0	0	60
SL4.0ch04	43986535	MantaBND:162:13402:13437:0:0:0:0	SL4.0CH05	54847918	BND	T	[SL4.0CH05:54847918[T	0	0	60
SL4.0ch04	43986551	MantaBND:158715:1:6:0:0:0:0	SL4.0CH05	54847935	BND	G	[SL4.0CH05:54847935[G	0	0	60
SL4.0ch04	43986558	MantaBND:32:7927:7934:0:0:0:0	SL4.0CH05	54847945	BND	T	[SL4.0CH05:54847945[T,[SL4.0CH05:54847941[T	0	0	60
SL4.0ch04	44362122	MantaBND:128:2074:4137:0:0:0:1	SL4.0CH02	25301929	BND	A	[SL4.0CH02:25301929[A	0	1	59
SL4.0ch04	44528063	MantaBND:514890:0:1:0:2:0:0	SL4.0CH11	17218988	BND	A	]SL4.0CH11:17218988]A	0	1	59
SL4.0ch04	46818357	MantaBND:128:14924:14925:0:4:0:0	SL4.0CH06	5000045	BND	C	[SL4.0CH06:5000045[C	0	0	60
SL4.0ch04	47231326	MantaBND:128:45395:45408:0:0:0:0	SL4.0CH08	57607990	BND	A	]SL4.0CH08:57607990]A	1	0	59
SL4.0ch04	47351723	MantaBND:128:52595:52603:0:0:0:0	SL4.0CH10	48909792	BND	A	A[SL4.0CH10:48909792[	1	0	59
SL4.0ch04	47987690	MantaBND:144425:1:6:0:0:0:1	SL4.0CH10	32433592	BND	A	]SL4.0CH10:32433592]A	1	0	59
SL4.0ch04	47987703	MantaBND:144425:1:8:0:0:0:1	SL4.0CH12	12452551	BND	C	[SL4.0CH12:12452551[C	1	0	59
SL4.0ch04	48119108	MantaBND:521886:0:1:0:0:0:1	SL4.0CH04	48132104	BND	A	A]SL4.0CH04:48132104]	0	1	59
SL4.0ch04	48132102	MantaBND:521886:0:1:0:0:0:0	SL4.0CH04	48119110	BND	C	C]SL4.0CH04:48119110]	0	1	59
SL4.0ch04	48662083	MantaBND:38769:1:2:0:0:0:1	SL4.0CH03	40579463	BND	C	[SL4.0CH03:40579463[C	1	0	59
SL4.0ch04	49806932	MantaBND:270166:0:1:0:0:0:1	SL4.0CH02	42293860	BND	A	A[SL4.0CH02:42293860[	2	0	58
SL4.0ch04	49839357	MantaBND:128:24059:24062:0:0:0:1	SL4.0CH08	53578452	BND	T	]SL4.0CH08:53578452]T	1	0	59
SL4.0ch04	49988259	MantaBND:143:18980:19033:0:0:0:0	SL4.0CH09	68229569	BND	T	T]SL4.0CH09:68229569]	0	0	60
SL4.0ch04	50085924	MantaBND:164750:0:1:0:0:0:1	SL4.0CH01	80135669	BND	A	]SL4.0CH01:80135669]A	1	0	59
SL4.0ch04	50618366	MantaBND:128:27903:27904:0:0:0:0	SL4.0CH09	10795871	BND	A	]SL4.0CH09:10795871]AA	0	1	59
SL4.0ch04	50691291	MantaBND:128:4277:4599:0:0:0:1	SL4.0CH10	10993344	BND	A	[SL4.0CH10:10993344[A	2	0	58
SL4.0ch04	50998959	MantaBND:50567:0:1:0:0:0:0	SL4.0CH01	22946296	BND	A	]SL4.0CH01:22946296]A	0	1	59
SL4.0ch04	51080044	MantaBND:241845:0:2:0:3:0:0	SL4.0CH02	28331288	BND	C	]SL4.0CH02:28331288]GC	2	0	58
SL4.0ch04	51081230	MantaBND:526910:1:2:0:6:0:0	SL4.0CH05	64535724	BND	T	TACCTTGTAACTTTCCTGCTCGCGAACT[SL4.0CH05:64535724[	1	0	59
SL4.0ch04	51515089	MantaBND:527915:0:1:0:0:0:1	SL4.0CH04	64181314	BND	A	A]SL4.0CH04:64181314]	1	0	59
SL4.0ch04	51724890	MantaBND:528109:0:1:0:0:0:0	SL4.0CH10	57269793	BND	C	[SL4.0CH10:57269793[C	1	0	59
SL4.0ch04	52668497	MantaBND:128:10503:10504:0:0:0:1	SL4.0CH06	21966029	BND	C	]SL4.0CH06:21966029]C	0	0	60
SL4.0ch04	52668513	MantaBND:128:10503:10505:0:7:0:1	SL4.0CH09	59305094	BND	G	[SL4.0CH09:59305094[G	1	0	59
SL4.0ch04	53702843	MantaBND:128:4263:9125:0:3:0:0	SL4.0CH11	21377999	BND	T	[SL4.0CH11:21377999[T	2	0	58
SL4.0ch04	53811425	MantaBND:128:37513:37514:0:0:0:1	SL4.0CH04	62331992	BND	T	T]SL4.0CH04:62331992]	1	0	59
SL4.0ch04	54264591	MantaBND:306480:1:3:0:4:0:0	SL4.0CH04	54428077	BND	T	[SL4.0CH04:54428077[T	1	0	59
SL4.0ch04	54291193	MantaBND:532541:0:1:0:1:0:1	SL4.0CH04	58320799	BND	T	TC]SL4.0CH04:58320799]	1	0	59
SL4.0ch04	54302529	MantaBND:532504:0:1:0:0:0:0	SL4.0CH05	31726343	BND	T	[SL4.0CH05:31726343[T	1	0	59
SL4.0ch04	54428073	MantaBND:306480:1:3:0:4:0:1	SL4.0CH04	54264595	BND	A	[SL4.0CH04:54264595[A	1	0	59
SL4.0ch04	54472562	MantaBND:443405:1:3:0:0:0:1	SL4.0CH10	3251022	BND	C	[SL4.0CH10:3251022[C	1	0	59
SL4.0ch04	54702337	MantaBND:533371:0:1:0:0:0:0	SL4.0CH07	2171734	BND	C	[SL4.0CH07:2171734[C	1	0	59
SL4.0ch04	54789644	MantaBND:315796:0:1:0:0:0:0	SL4.0CH03	9560483	BND	A	[SL4.0CH03:9560483[A	1	0	59
SL4.0ch04	54962186	MantaBND:211081:0:1:0:0:0:0	SL4.0CH03	15582364	BND	G	G[SL4.0CH03:15582364[	0	0	60
SL4.0ch04	55228826	MantaBND:128:7334:7336:0:6:0:1	SL4.0CH03	56291467	BND	T	[SL4.0CH03:56291467[GTTGCTCCATCGTGCGTAAGTCTCTCAATAT	2	0	58
SL4.0ch04	55232442	MantaBND:128:9668:9672:0:0:0:0	SL4.0CH10	61217694	BND	T	[SL4.0CH10:61217694[T	1	0	59
SL4.0ch04	55253609	MantaBND:534427:0:1:0:0:0:1	SL4.0CH09	64287702	BND	C	C]SL4.0CH09:64287702]	1	0	59
SL4.0ch04	55338669	MantaBND:534443:0:1:1:1:0:1	SL4.0CH04	55338943	BND	C	C]SL4.0CH04:55338943]	0	2	58
SL4.0ch04	55338676	MantaBND:534443:0:1:2:2:0:1	SL4.0CH04	55338962	BND	G	[SL4.0CH04:55338962[G	2	0	58
SL4.0ch04	55338942	MantaBND:534443:0:1:1:1:0:0	SL4.0CH04	55338670	BND	T	T]SL4.0CH04:55338670]	0	2	58
SL4.0ch04	55338962	MantaBND:534443:0:1:2:2:0:0	SL4.0CH04	55338676	BND	G	[SL4.0CH04:55338676[G	2	0	58
SL4.0ch04	55767892	MantaBND:118165:0:2:0:0:0:1	SL4.0CH01	57444434	BND	C	C[SL4.0CH01:57444434[	1	0	59
SL4.0ch04	56784394	MantaBND:203731:18:19:0:1:0:0	SL4.0CH03	49377687	BND	T	TC[SL4.0CH03:49377687[	0	1	59
SL4.0ch04	57287989	MantaBND:128:9387:9429:0:0:0:0	SL4.0CH02	51447108	BND	A	AT]SL4.0CH02:51447108]	2	0	58
SL4.0ch04	57296753	MantaBND:128:9324:9387:0:0:0:1	SL4.0CH02	51447127	BND	A	]SL4.0CH02:51447127]CAAA	3	0	57
SL4.0ch04	57314936	MantaBND:538451:0:2:0:3:0:1	SL4.0CH06	40857637	BND	A	]SL4.0CH06:40857637]CAA	2	0	58
SL4.0ch04	57319523	MantaBND:128:9430:9460:0:0:0:0	SL4.0CH04	57320840	BND	C	CGAGGA]SL4.0CH04:57320840]	2	0	58
SL4.0ch04	57320840	MantaBND:128:9430:9460:0:0:0:1	SL4.0CH04	57319523	BND	A	ATCCTC]SL4.0CH04:57319523]	2	0	58
SL4.0ch04	57381611	MantaBND:65336:7:8:0:0:0:1	SL4.0CH12	5285271	BND	T	[SL4.0CH12:5285271[T	1	0	59
SL4.0ch04	57446206	MantaBND:538994:0:0:2:1:0:0	SL4.0CH04	57446321	BND	T	TCTATTGCCACGTAGGAAGTA]SL4.0CH04:57446321]	0	2	58
SL4.0ch04	57446321	MantaBND:538994:0:0:2:1:0:1	SL4.0CH04	57446206	BND	T	TTACTTCCTACGTGGCAATAG]SL4.0CH04:57446206]	0	2	58
SL4.0ch04	57506501	MantaBND:539072:0:1:0:0:0:0	SL4.0CH12	51019696	BND	T	T[SL4.0CH12:51019696[	1	0	59
SL4.0ch04	57781343	MantaBND:128:16303:16306:0:0:0:0	SL4.0CH03	47804994	BND	G	[SL4.0CH03:47804994[G	1	0	59
SL4.0ch04	57980184	MantaBND:540010:5:9:0:0:0:0	SL4.0CH06	39035168	BND	T	T]SL4.0CH06:39035168]	2	0	58
SL4.0ch04	58075282	MantaBND:540424:0:1:1:0:0:0	SL4.0CH06	36520232	BND	T	[SL4.0CH06:36520232[T	1	0	59
SL4.0ch04	58075571	MantaBND:540424:0:1:0:0:0:1	SL4.0CH06	36520258	BND	A	A]SL4.0CH06:36520258]	1	0	59
SL4.0ch04	58320799	MantaBND:532541:0:1:0:1:0:0	SL4.0CH04	54291193	BND	A	AG]SL4.0CH04:54291193]	1	0	59
SL4.0ch04	58462795	MantaBND:128:9763:9764:0:0:0:1	SL4.0CH12	45657812	BND	A	]SL4.0CH12:45657812]CA	1	0	59
SL4.0ch04	58691244	MantaBND:128:48737:48810:1:0:0:0	SL4.0CH12	29603399	BND	A	[SL4.0CH12:29603399[A	1	0	59
SL4.0ch04	58691487	MantaBND:128:48737:48810:0:1:0:0	SL4.0CH12	29603365	BND	A	A]SL4.0CH12:29603365]	1	0	59
SL4.0ch04	58878197	MantaBND:23746:6:13:0:0:0:1	SL4.0CH12	50187671	BND	A	A]SL4.0CH12:50187671]	1	0	59
SL4.0ch04	58892283	MantaBND:128:49463:49464:0:0:0:0	SL4.0CH11	52801850	BND	T	TTATGATCAATACACACTGTGAG]SL4.0CH11:52801850]	0	1	59
SL4.0ch04	59042319	MantaBND:103818:1:20:0:0:0:1	SL4.0CH12	27584180	BND	T	T]SL4.0CH12:27584180]	0	0	60
SL4.0ch04	59042332	MantaBND:121242:1:9:0:0:0:1	SL4.0CH12	27584151	BND	T	T]SL4.0CH12:27584151]	0	0	60
SL4.0ch04	59104995	MantaBND:164598:1:3:0:0:0:1	SL4.0CH05	2833208	BND	C	[SL4.0CH05:2833208[C	1	0	59
SL4.0ch04	59105790	MantaBND:164598:1:2:0:1:0:1	SL4.0CH05	2833556	BND	C	CATTAACCT]SL4.0CH05:2833556]	1	0	59
SL4.0ch04	59214436	MantaBND:484460:1:3:0:0:0:0	SL4.0CH04	29789586	BND	G	G]SL4.0CH04:29789586]	1	0	59
SL4.0ch04	59848929	MantaBND:544302:0:1:0:0:0:1	SL4.0CH09	63095928	BND	C	]SL4.0CH09:63095928]C	2	0	58
SL4.0ch04	59849625	MantaBND:544302:1:2:0:0:0:1	SL4.0CH09	63095951	BND	C	C[SL4.0CH09:63095951[	2	0	58
SL4.0ch04	60008111	MantaBND:148912:15:19:0:1:0:0	SL4.0CH06	2518690	BND	C	C[SL4.0CH06:2518690[	1	0	59
SL4.0ch04	60217555	MantaBND:545166:0:1:0:0:0:1	SL4.0CH08	59899914	BND	A	A]SL4.0CH08:59899914]	1	0	59
SL4.0ch04	60221256	MantaBND:142246:0:1:0:0:0:0	SL4.0CH12	61114109	BND	A	A[SL4.0CH12:61114109[	0	1	59
SL4.0ch04	60444319	MantaBND:545850:0:1:0:0:0:1	SL4.0CH08	19276362	BND	A	]SL4.0CH08:19276362]TA	1	0	59
SL4.0ch04	60894273	MantaBND:546897:0:1:0:1:0:0	SL4.0CH10	45145413	BND	T	[SL4.0CH10:45145413[TTT	1	0	59
SL4.0ch04	60895316	MantaBND:546897:3:4:0:0:0:0	SL4.0CH10	45120872	BND	A	A]SL4.0CH10:45120872]	1	0	59
SL4.0ch04	61019410	MantaBND:128:19705:19711:0:0:0:1	SL4.0CH07	34899855	BND	T	]SL4.0CH07:34899855]T	2	0	58
SL4.0ch04	61210016	MantaBND:128:17384:17386:0:4:0:1	SL4.0CH03	59338280	BND	T	[SL4.0CH03:59338280[T	1	0	59
SL4.0ch04	61609625	MantaBND:252060:4:6:0:0:0:0	SL4.0CH09	21872088	BND	C	C]SL4.0CH09:21872088]	1	0	59
SL4.0ch04	61613912	MantaBND:548559:0:1:0:4:0:0	SL4.0CH10	59308297	BND	T	[SL4.0CH10:59308297[T	1	0	59
SL4.0ch04	61738263	MantaBND:280601:0:1:0:0:0:1	SL4.0CH07	62323234	BND	T	]SL4.0CH07:62323234]T	0	0	60
SL4.0ch04	62000731	MantaBND:272022:1:3:0:0:0:1	SL4.0CH07	65437435	BND	A	[SL4.0CH07:65437435[A	1	0	59
SL4.0ch04	62057901	MantaBND:128:5822:5823:0:0:0:0	SL4.0CH01	1959738	BND	A	A]SL4.0CH01:1959738]	1	0	59
SL4.0ch04	62094583	MantaBND:151362:0:1:0:0:0:0	SL4.0CH01	74557823	BND	A	A[SL4.0CH01:74557823[	1	0	59
SL4.0ch04	62281704	MantaBND:550283:0:1:0:1:0:0	SL4.0CH04	62281865	BND	G	G]SL4.0CH04:62281865]	1	0	59
SL4.0ch04	62281862	MantaBND:550283:0:1:0:1:0:1	SL4.0CH04	62281707	BND	T	T]SL4.0CH04:62281707]	1	0	59
SL4.0ch04	62331992	MantaBND:128:37513:37514:0:0:0:0	SL4.0CH04	53811425	BND	C	C]SL4.0CH04:53811425]	1	0	59
SL4.0ch04	62905710	MantaBND:182382:0:1:0:0:0:0	SL4.0CH01	87772918	BND	G	[SL4.0CH01:87772918[G	1	0	59
SL4.0ch04	63860122	MantaBND:128:39475:39479:0:0:0:0	SL4.0CH03	9925593	BND	C	]SL4.0CH03:9925593]C	1	0	59
SL4.0ch04	63860250	MantaBND:128:39475:39480:0:0:0:1	SL4.0CH02	42779122	BND	T	]SL4.0CH02:42779122]T	1	0	59
SL4.0ch04	63860384	MantaBND:128:39475:39476:0:0:0:1	SL4.0CH02	42778730	BND	A	A[SL4.0CH02:42778730[	1	0	59
SL4.0ch04	64152227	MantaBND:554325:1:1:2:0:0:1	SL4.0CH04	64152412	BND	G	G]SL4.0CH04:64152412]	1	0	59
SL4.0ch04	64152412	MantaBND:554325:1:1:2:0:0:0	SL4.0CH04	64152227	BND	C	C]SL4.0CH04:64152227]	1	0	59
SL4.0ch04	64181308	MantaBND:527915:0:1:0:0:0:0	SL4.0CH04	51515095	BND	T	T]SL4.0CH04:51515095]	1	0	59
SL4.0ch04	64330672	MantaBND:131474:1:2:0:0:0:0	SL4.0CH10	11020487	BND	A	A]SL4.0CH10:11020487]	2	0	58
SL4.0ch04	64458667	MantaBND:555005:0:1:0:0:0:1	SL4.0CH06	47258347	BND	A	ACTTCT]SL4.0CH06:47258347]	1	1	58
SL4.0ch05	199194	MantaBND:555217:0:1:0:0:0:1	SL4.0CH06	23871178	BND	T	]SL4.0CH06:23871178]T	1	0	59
SL4.0ch05	323138	MantaBND:239091:0:1:1:1:0:0	SL4.0CH05	323922	BND	G	[SL4.0CH05:323922[ATATTTGCG	1	0	59
SL4.0ch05	323922	MantaBND:239091:0:1:1:1:0:1	SL4.0CH05	323138	BND	A	[SL4.0CH05:323138[GCAAATATA	1	0	59
SL4.0ch05	371445	MantaBND:555706:0:1:0:2:0:1	SL4.0CH11	8298199	BND	A	A]SL4.0CH11:8298199]	1	0	59
SL4.0ch05	374306	MantaBND:128:5269:8841:0:3:0:1	SL4.0CH03	6491211	BND	A	AA]SL4.0CH03:6491211]	0	2	58
SL4.0ch05	1148286	MantaBND:128:16179:16185:0:4:0:0	SL4.0CH04	7866787	BND	C	C[SL4.0CH04:7866787[	1	0	59
SL4.0ch05	1255355	MantaBND:557592:2:3:0:0:0:0	SL4.0CH06	36212564	BND	A	A[SL4.0CH06:36212564[	1	0	59
SL4.0ch05	1403894	MantaBND:144215:0:1:0:0:0:0	SL4.0CH01	71106663	BND	T	[SL4.0CH01:71106663[T	1	1	58
SL4.0ch05	1449080	MantaBND:558139:0:1:0:0:0:1	SL4.0CH08	3640485	BND	T	TTT]SL4.0CH08:3640485]	0	1	59
SL4.0ch05	2027607	MantaBND:128:10128:10130:0:0:0:0	SL4.0CH06	39422553	BND	T	[SL4.0CH06:39422553[T	1	0	59
SL4.0ch05	2134538	MantaBND:128:48530:48531:0:0:0:1	SL4.0CH11	46642412	BND	A	[SL4.0CH11:46642412[A	2	0	58
SL4.0ch05	2553704	MantaBND:128:4668:4670:1:0:0:0	SL4.0CH02	44313800	BND	A	[SL4.0CH02:44313800[A	1	0	59
SL4.0ch05	2553993	MantaBND:128:4668:4670:0:1:0:1	SL4.0CH02	44313843	BND	T	TA]SL4.0CH02:44313843]	1	0	59
SL4.0ch05	2766597	MantaBND:561069:0:0:3:0:0:0	SL4.0CH05	2766742	BND	A	A]SL4.0CH05:2766742]	0	1	59
SL4.0ch05	2766742	MantaBND:561069:0:0:3:0:0:1	SL4.0CH05	2766597	BND	A	A]SL4.0CH05:2766597]	0	1	59
SL4.0ch05	2833208	MantaBND:164598:1:3:0:0:0:0	SL4.0CH04	59104995	BND	T	[SL4.0CH04:59104995[T	1	0	59
SL4.0ch05	2833556	MantaBND:164598:1:2:0:1:0:0	SL4.0CH04	59105790	BND	C	CAGGTTAAT]SL4.0CH04:59105790]	1	0	59
SL4.0ch05	2833556	MantaBND:164598:0:1:0:7:0:0	SL4.0CH01	80194689	BND	C	CAGGTTAATGTCAAAACCAATTTTTCATACTTGAAA[SL4.0CH01:80194689[	3	0	57
SL4.0ch05	3127085	MantaBND:128:49285:49290:0:1:0:0	SL4.0CH01	82397729	BND	T	T[SL4.0CH01:82397729[	0	1	59
SL4.0ch05	3212006	MantaBND:128:25205:25206:0:1:0:1	SL4.0CH05	4798874	BND	T	T]SL4.0CH05:4798874]	1	1	58
SL4.0ch05	3212410	MantaBND:128:25205:25206:1:0:0:1	SL4.0CH05	4798761	BND	T	[SL4.0CH05:4798761[T	1	0	59
SL4.0ch05	4436634	MantaBND:565024:0:1:0:0:0:1	SL4.0CH11	10745415	BND	A	A]SL4.0CH11:10745415]	1	0	59
SL4.0ch05	4767485	MantaBND:565478:0:1:0:0:0:0	SL4.0CH05	4810673	BND	T	T]SL4.0CH05:4810673]	1	0	59
SL4.0ch05	4798761	MantaBND:128:25205:25206:1:0:0:0	SL4.0CH05	3212410	BND	A	[SL4.0CH05:3212410[A	1	0	59
SL4.0ch05	4798862	MantaBND:128:25205:25206:0:1:0:0	SL4.0CH05	3212018	BND	A	A]SL4.0CH05:3212018]	1	1	58
SL4.0ch05	4810673	MantaBND:565478:0:1:0:0:0:1	SL4.0CH05	4767485	BND	A	A]SL4.0CH05:4767485]	1	0	59
SL4.0ch05	4873710	MantaBND:128:24175:24176:0:0:0:0	SL4.0CH12	31832483	BND	A	]SL4.0CH12:31832483]TA	1	0	59
SL4.0ch05	4899027	MantaBND:143:17697:17699:0:0:0:1	SL4.0CH09	57711424	BND	T	T]SL4.0CH09:57711424]	0	0	60
SL4.0ch05	4970484	MantaBND:341960:0:1:0:0:0:0	SL4.0CH09	62054938	BND	A	A]SL4.0CH09:62054938]	0	0	60
SL4.0ch05	4970488	MantaBND:565706:0:1:0:0:0:0	SL4.0CH09	62054936	BND	A	A]SL4.0CH09:62054936]	0	0	60
SL4.0ch05	4987648	MantaBND:128:24150:24157:0:4:0:1	SL4.0CH08	56526447	BND	T	[SL4.0CH08:56526447[T	2	2	56
SL4.0ch05	4989508	MantaBND:128:28156:28216:0:4:0:0	SL4.0CH08	56522384	BND	A	A]SL4.0CH08:56522384]	1	0	59
SL4.0ch05	5029037	MantaBND:148912:9:10:0:1:0:1	SL4.0CH01	86062683	BND	C	CTATCAAGT[SL4.0CH01:86062683[	1	0	59
SL4.0ch05	5029292	MantaBND:148912:9:14:1:7:0:1	SL4.0CH02	41375564	BND	T	TTCTTTCATAAATGAGAA]SL4.0CH02:41375564]	2	0	58
SL4.0ch05	5029644	MantaBND:148912:9:22:0:0:0:0	SL4.0CH07	67733047	BND	C	]SL4.0CH07:67733047]TCATCATACCATTCATCATACTAAGC	1	0	59
SL4.0ch05	5029736	MantaBND:148912:9:14:2:9:0:0	SL4.0CH02	41375008	BND	A	[SL4.0CH02:41375008[A	2	0	58
SL4.0ch05	5029894	MantaBND:148912:9:20:0:0:0:1	SL4.0CH11	1131858	BND	T	T]SL4.0CH11:1131858]	1	0	59
SL4.0ch05	5439529	MantaBND:128:19618:19619:0:0:0:1	SL4.0CH05	5440003	BND	T	T]SL4.0CH05:5440003]	1	0	59
SL4.0ch05	5440003	MantaBND:128:19618:19619:0:0:0:0	SL4.0CH05	5439529	BND	A	A]SL4.0CH05:5439529]	1	0	59
SL4.0ch05	5642380	MantaBND:128:46518:46524:0:0:0:0	SL4.0CH06	7259257	BND	A	A[SL4.0CH06:7259257[	1	0	59
SL4.0ch05	5991004	MantaBND:128:12868:18238:0:3:0:1	SL4.0CH02	11863002	BND	G	GTGA[SL4.0CH02:11863002[	1	0	59
SL4.0ch05	6084471	MantaBND:128:36390:36391:0:7:0:1	SL4.0CH04	2822429	BND	T	[SL4.0CH04:2822429[AT	1	0	59
SL4.0ch05	6154792	MantaBND:56687:0:1:0:0:0:0	SL4.0CH01	25894071	BND	G	G]SL4.0CH01:25894071]	1	0	59
SL4.0ch05	6477877	MantaBND:510438:1:2:1:2:0:1	SL4.0CH05	6483527	BND	T	[SL4.0CH05:6483527[TT	1	0	59
SL4.0ch05	6483527	MantaBND:510438:1:2:1:2:0:0	SL4.0CH05	6477877	BND	A	[SL4.0CH05:6477877[AA	1	0	59
SL4.0ch05	6583541	MantaBND:569383:0:1:0:0:0:0	SL4.0CH11	33039551	BND	C	C[SL4.0CH11:33039551[	2	0	58
SL4.0ch05	6617430	MantaBND:569357:0:1:0:0:0:1	SL4.0CH06	1319276	BND	A	[SL4.0CH06:1319276[A	1	0	59
SL4.0ch05	6666375	MantaBND:128:25820:25822:0:0:0:0	SL4.0CH05	33228171	BND	G	G]SL4.0CH05:33228171]	1	0	59
SL4.0ch05	6712935	MantaBND:119185:3:4:0:0:0:1	SL4.0CH10	13243678	BND	C	C[SL4.0CH10:13243678[	1	0	59
SL4.0ch05	7163950	MantaBND:128:4443:10540:0:1:0:0	SL4.0CH08	3422237	BND	A	AA[SL4.0CH08:3422237[	1	0	59
SL4.0ch05	7367175	MantaBND:287266:0:1:0:0:0:1	SL4.0CH02	49884966	BND	A	]SL4.0CH02:49884966]A	1	0	59
SL4.0ch05	7528763	MantaBND:121706:3:4:0:0:0:1	SL4.0CH12	36574282	BND	A	A]SL4.0CH12:36574282]	0	1	59
SL4.0ch05	8081190	MantaBND:328669:0:1:0:0:0:0	SL4.0CH05	35378251	BND	A	[SL4.0CH05:35378251[A	0	0	60
SL4.0ch05	8304949	MantaBND:572518:1:2:0:0:0:0	SL4.0CH10	32442603	BND	T	[SL4.0CH10:32442603[T	1	0	59
SL4.0ch05	8305369	MantaBND:572518:0:1:0:0:0:0	SL4.0CH10	32442602	BND	A	A]SL4.0CH10:32442602]	1	0	59
SL4.0ch05	8326269	MantaBND:572692:0:2:0:0:0:0	SL4.0CH12	54534921	BND	C	]SL4.0CH12:54534921]CC	1	1	58
SL4.0ch05	8688596	MantaBND:64055:22:29:0:0:0:1	SL4.0CH05	8746752	BND	C	[SL4.0CH05:8746752[C	1	0	59
SL4.0ch05	8746752	MantaBND:64055:22:29:0:0:0:0	SL4.0CH05	8688596	BND	A	[SL4.0CH05:8688596[A	1	0	59
SL4.0ch05	9271213	MantaBND:128:3976:10277:0:0:0:0	SL4.0CH11	35221907	BND	A	A[SL4.0CH11:35221907[	1	0	59
SL4.0ch05	10325732	MantaBND:162:992:11552:0:0:0:1	SL4.0CH08	408015	BND	T	T]SL4.0CH08:408015]	0	0	60
SL4.0ch05	10325787	MantaBND:19703:3:4:0:0:0:0	SL4.0CH02	31756509	BND	T	T]SL4.0CH02:31756509]	0	0	60
SL4.0ch05	10572702	MantaBND:128:5350:10642:0:0:0:0	SL4.0CH03	50536506	BND	A	A]SL4.0CH03:50536506]	2	0	58
SL4.0ch05	10603197	MantaBND:128:2597:10629:0:0:0:0	SL4.0CH09	49521092	BND	T	]SL4.0CH09:49521092]T	1	0	59
SL4.0ch05	10610890	MantaBND:128:2115:24894:0:0:0:0	SL4.0CH08	3806878	BND	T	[SL4.0CH08:3806878[T	1	1	58
SL4.0ch05	10853729	MantaBND:21691:22:23:0:1:0:0	SL4.0CH02	24995686	BND	A	[SL4.0CH02:24995686[A	2	0	58
SL4.0ch05	11488665	MantaBND:128:27826:27828:1:1:0:0	SL4.0CH08	50152587	BND	A	]SL4.0CH08:50152587]A	1	0	59
SL4.0ch05	11820542	MantaBND:578745:0:1:0:0:0:0	SL4.0CH10	38875723	BND	A	[SL4.0CH10:38875723[A	1	0	59
SL4.0ch05	11908916	MantaBND:100128:2:3:0:0:0:0	SL4.0CH03	47804969	BND	A	[SL4.0CH03:47804969[A	0	0	60
SL4.0ch05	12118790	MantaBND:579107:0:1:0:0:0:0	SL4.0CH08	619846	BND	T	]SL4.0CH08:619846]T	1	0	59
SL4.0ch05	12678214	MantaBND:580248:0:1:0:0:0:1	SL4.0CH08	50892685	BND	T	]SL4.0CH08:50892685]T	1	0	59
SL4.0ch05	14673121	MantaBND:276754:6:7:0:0:0:0	SL4.0CH11	49435176	BND	C	]SL4.0CH11:49435176]C	1	0	59
SL4.0ch05	14673560	MantaBND:276754:5:6:0:0:0:1	SL4.0CH03	23028944	BND	C	C]SL4.0CH03:23028944]	2	0	58
SL4.0ch05	17062136	MantaBND:128:51577:51584:0:0:0:1	SL4.0CH12	21861924	BND	G	G]SL4.0CH12:21861924]	1	0	59
SL4.0ch05	17081283	MantaBND:397870:0:2:0:6:0:1	SL4.0CH03	52973786	BND	G	[SL4.0CH03:52973786[CG	1	0	59
SL4.0ch05	17081438	MantaBND:397870:0:1:0:9:0:1	SL4.0CH03	52973758	BND	G	G]SL4.0CH03:52973758]	1	0	59
SL4.0ch05	17145414	MantaBND:128:2906:11044:0:0:0:1	SL4.0CH06	29520657	BND	A	[SL4.0CH06:29520657[A	0	1	59
SL4.0ch05	17827770	MantaBND:128:29792:29793:1:0:0:1	SL4.0CH09	64023732	BND	A	[SL4.0CH09:64023732[A	1	0	59
SL4.0ch05	17828056	MantaBND:128:29791:29792:0:0:0:0	SL4.0CH09	64039663	BND	A	A]SL4.0CH09:64039663]	1	0	59
SL4.0ch05	18035927	MantaBND:441698:0:1:0:0:0:1	SL4.0CH04	8008929	BND	A	[SL4.0CH04:8008929[A	1	0	59
SL4.0ch05	18036245	MantaBND:441698:1:3:0:0:0:1	SL4.0CH09	6881470	BND	C	C]SL4.0CH09:6881470]	1	0	59
SL4.0ch05	18052145	MantaBND:262162:1:2:0:0:0:1	SL4.0CH02	39069309	BND	T	T]SL4.0CH02:39069309]	1	0	59
SL4.0ch05	18052272	MantaBND:262162:2:3:0:4:0:1	SL4.0CH02	39068307	BND	A	[SL4.0CH02:39068307[A	1	0	59
SL4.0ch05	18500201	MantaBND:592735:0:1:0:3:0:1	SL4.0CH11	24157264	BND	T	T]SL4.0CH11:24157264]	1	2	57
SL4.0ch05	18827719	MantaBND:17873:0:1:0:0:0:0	SL4.0CH01	7604639	BND	A	A]SL4.0CH01:7604639]	0	0	60
SL4.0ch05	19346255	MantaBND:128:11077:11078:0:0:0:1	SL4.0CH06	1080087	BND	T	[SL4.0CH06:1080087[T	1	0	59
SL4.0ch05	19689784	MantaBND:594720:0:1:0:0:0:1	SL4.0CH05	19699008	BND	G	G]SL4.0CH05:19699008]	0	1	59
SL4.0ch05	19699008	MantaBND:594720:0:1:0:0:0:0	SL4.0CH05	19689784	BND	G	G]SL4.0CH05:19689784]	0	1	59
SL4.0ch05	20180521	MantaBND:128:36078:36079:0:0:0:0	SL4.0CH01	72367127	BND	T	]SL4.0CH01:72367127]T	1	0	59
SL4.0ch05	20563171	MantaBND:260784:0:2:0:6:0:1	SL4.0CH02	38311717	BND	C	]SL4.0CH02:38311717]AAAAAAAAAATC	1	0	59
SL4.0ch05	22078432	MantaBND:599118:0:0:7:1:0:1	SL4.0CH05	22078553	BND	T	T]SL4.0CH05:22078553]	0	2	58
SL4.0ch05	22078436	MantaBND:599118:0:0:8:0:0:1	SL4.0CH05	22078555	BND	A	[SL4.0CH05:22078555[A	3	0	57
SL4.0ch05	22078550	MantaBND:599118:0:0:7:1:0:0	SL4.0CH05	22078435	BND	A	A]SL4.0CH05:22078435]	0	2	58
SL4.0ch05	22078554	MantaBND:599118:0:0:8:0:0:0	SL4.0CH05	22078437	BND	T	[SL4.0CH05:22078437[T	3	0	57
SL4.0ch05	22211979	MantaBND:128:9881:17829:0:1:0:0	SL4.0CH11	6268079	BND	C	C]SL4.0CH11:6268079]	2	0	58
SL4.0ch05	23263447	MantaBND:128:39675:39681:0:0:0:1	SL4.0CH11	31208462	BND	A	[SL4.0CH11:31208462[A	1	0	59
SL4.0ch05	23593369	MantaBND:128:2936:2937:0:0:0:1	SL4.0CH01	69476066	BND	T	T[SL4.0CH01:69476066[	1	0	59
SL4.0ch05	24035843	MantaBND:86595:12:13:0:0:0:1	SL4.0CH04	26961366	BND	T	]SL4.0CH04:26961366]T	1	0	59
SL4.0ch05	24242527	MantaBND:128:2013:5261:0:0:0:1	SL4.0CH12	43970067	BND	A	A]SL4.0CH12:43970067]	2	0	58
SL4.0ch05	24449128	MantaBND:128:14145:14211:0:0:0:1	SL4.0CH03	47484235	BND	A	AGAAATTCAGGAGAGAGAGT[SL4.0CH03:47484235[	1	0	59
SL4.0ch05	24589663	MantaBND:128:4292:4295:0:0:0:0	SL4.0CH02	29721618	BND	T	T]SL4.0CH02:29721618]	1	0	59
SL4.0ch05	24665739	MantaBND:128:47720:47721:0:0:0:1	SL4.0CH11	42275013	BND	T	[SL4.0CH11:42275013[T	1	0	59
SL4.0ch05	25310240	MantaBND:605345:0:2:0:0:0:0	SL4.0CH05	25323467	BND	A	[SL4.0CH05:25323467[A	1	2	57
SL4.0ch05	25323466	MantaBND:605345:0:2:0:0:0:1	SL4.0CH05	25310241	BND	T	[SL4.0CH05:25310241[T	1	2	57
SL4.0ch05	25763570	MantaBND:196888:1:3:0:0:0:0	SL4.0CH05	25768367	BND	T	T]SL4.0CH05:25768367]	1	0	59
SL4.0ch05	25768367	MantaBND:196888:1:3:0:0:0:1	SL4.0CH05	25763570	BND	A	A]SL4.0CH05:25763570]	1	0	59
SL4.0ch05	26899557	MantaBND:465330:0:1:0:2:0:1	SL4.0CH04	20554044	BND	A	AGATATTA]SL4.0CH04:20554044]	1	0	59
SL4.0ch05	27045914	MantaBND:128:47897:47930:0:0:0:0	SL4.0CH10	13867300	BND	C	[SL4.0CH10:13867300[C	1	0	59
SL4.0ch05	27762844	MantaBND:609521:0:1:0:0:0:1	SL4.0CH06	20442762	BND	T	]SL4.0CH06:20442762]T	1	0	59
SL4.0ch05	29198399	MantaBND:128:21443:21447:0:0:0:0	SL4.0CH05	29762915	BND	G	GC]SL4.0CH05:29762915]	0	3	57
SL4.0ch05	29299315	MantaBND:516842:4:9:0:0:0:1	SL4.0CH05	31556899	BND	T	T]SL4.0CH05:31556899]	1	0	59
SL4.0ch05	29467815	MantaBND:612789:0:1:0:0:0:0	SL4.0CH09	6219129	BND	G	]SL4.0CH09:6219129]G	2	0	58
SL4.0ch05	29762915	MantaBND:128:21443:21447:0:0:0:1	SL4.0CH05	29198399	BND	T	TG]SL4.0CH05:29198399]	0	3	57
SL4.0ch05	29969507	MantaBND:613605:1:2:0:0:0:0	SL4.0CH05	29988654	BND	T	T]SL4.0CH05:29988654]	1	0	59
SL4.0ch05	29976927	MantaBND:613605:0:1:0:0:0:0	SL4.0CH05	29988933	BND	C	[SL4.0CH05:29988933[C	0	1	59
SL4.0ch05	29988654	MantaBND:613605:1:2:0:0:0:1	SL4.0CH05	29969507	BND	C	C]SL4.0CH05:29969507]	1	0	59
SL4.0ch05	29988933	MantaBND:613605:0:1:0:0:0:1	SL4.0CH05	29976927	BND	A	[SL4.0CH05:29976927[A	0	1	59
SL4.0ch05	30741817	MantaBND:615367:0:1:0:0:0:0	SL4.0CH08	36177242	BND	A	[SL4.0CH08:36177242[A	0	1	59
SL4.0ch05	31526282	MantaBND:128:39828:39829:0:4:0:0	SL4.0CH05	35607414	BND	A	A]SL4.0CH05:35607414]	0	2	58
SL4.0ch05	31556899	MantaBND:516842:4:9:0:0:0:0	SL4.0CH05	29299315	BND	A	A]SL4.0CH05:29299315]	1	0	59
SL4.0ch05	31726343	MantaBND:532504:0:1:0:0:0:1	SL4.0CH04	54302529	BND	A	[SL4.0CH04:54302529[A	1	0	59
SL4.0ch05	31753670	MantaBND:173120:0:1:0:0:0:1	SL4.0CH01	83713951	BND	T	TA[SL4.0CH01:83713951[	2	0	58
SL4.0ch05	31854350	MantaBND:52854:14:17:0:0:0:1	SL4.0CH06	30550137	BND	A	A[SL4.0CH06:30550137[	1	0	59
SL4.0ch05	32251417	MantaBND:229520:1:2:0:0:0:1	SL4.0CH11	35010965	BND	A	A]SL4.0CH11:35010965]	1	0	59
SL4.0ch05	32923747	MantaBND:128:17206:17332:0:0:0:1	SL4.0CH03	36297538	BND	A	A[SL4.0CH03:36297538[	1	0	59
SL4.0ch05	33228171	MantaBND:128:25820:25822:0:0:0:1	SL4.0CH05	6666375	BND	A	A]SL4.0CH05:6666375]	1	0	59
SL4.0ch05	33469704	MantaBND:128:2592:2622:0:0:0:0	SL4.0CH01	51196590	BND	C	]SL4.0CH01:51196590]C	1	0	59
SL4.0ch05	35378251	MantaBND:328669:0:1:0:0:0:1	SL4.0CH05	8081190	BND	C	[SL4.0CH05:8081190[C	0	0	60
SL4.0ch05	35607413	MantaBND:128:39828:39829:0:4:0:1	SL4.0CH05	31526283	BND	T	T]SL4.0CH05:31526283]	0	2	58
SL4.0ch05	36762884	MantaBND:627739:0:0:5:0:0:1	SL4.0CH05	36763013	BND	C	C]SL4.0CH05:36763013]	1	0	59
SL4.0ch05	36763013	MantaBND:627739:0:0:5:0:0:0	SL4.0CH05	36762884	BND	T	T]SL4.0CH05:36762884]	1	0	59
SL4.0ch05	37097497	MantaBND:128:19095:19101:0:0:0:1	SL4.0CH06	39149011	BND	A	[SL4.0CH06:39149011[A	1	0	59
SL4.0ch05	37437436	MantaBND:628876:0:1:1:1:0:1	SL4.0CH05	37438155	BND	A	[SL4.0CH05:37438155[A	1	0	59
SL4.0ch05	37438152	MantaBND:628876:0:1:1:1:0:0	SL4.0CH05	37437439	BND	A	[SL4.0CH05:37437439[A	1	0	59
SL4.0ch05	37550412	MantaBND:123119:1:2:1:0:0:1	SL4.0CH03	43723552	BND	A	[SL4.0CH03:43723552[A	1	0	59
SL4.0ch05	37550465	MantaBND:123119:1:2:0:0:0:0	SL4.0CH03	43723753	BND	A	A]SL4.0CH03:43723753]	2	0	58
SL4.0ch05	37674057	MantaBND:629377:0:1:0:0:0:1	SL4.0CH05	38038821	BND	T	T]SL4.0CH05:38038821]	1	2	57
SL4.0ch05	38038820	MantaBND:629377:0:1:0:0:0:0	SL4.0CH05	37674058	BND	A	A]SL4.0CH05:37674058]	1	2	57
SL4.0ch05	39688605	MantaBND:633701:0:1:0:0:0:1	SL4.0CH05	40734198	BND	T	[SL4.0CH05:40734198[T	0	2	58
SL4.0ch05	40634224	MantaBND:635613:1:2:0:0:0:1	SL4.0CH08	49670122	BND	A	A[SL4.0CH08:49670122[	0	1	59
SL4.0ch05	40734198	MantaBND:633701:0:1:0:0:0:0	SL4.0CH05	39688605	BND	A	[SL4.0CH05:39688605[A	0	2	58
SL4.0ch05	40872701	MantaBND:635951:0:1:0:4:0:0	SL4.0CH11	11898948	BND	A	[SL4.0CH11:11898948[A	1	0	59
SL4.0ch05	41960846	MantaBND:638365:0:1:0:8:0:0	SL4.0CH05	42104687	BND	T	[SL4.0CH05:42104687[T	1	0	59
SL4.0ch05	42104686	MantaBND:638365:0:1:0:8:0:1	SL4.0CH05	41960847	BND	A	[SL4.0CH05:41960847[A	1	0	59
SL4.0ch05	42468794	MantaBND:26365:1:4:0:0:0:0	SL4.0CH05	42477141	BND	T	T]SL4.0CH05:42477141]	1	0	59
SL4.0ch05	42477140	MantaBND:26365:1:4:0:0:0:1	SL4.0CH05	42468795	BND	C	C]SL4.0CH05:42468795]	1	0	59
SL4.0ch05	43270210	MantaBND:128:21625:21630:0:0:0:0	SL4.0CH02	39023588	BND	C	]SL4.0CH02:39023588]C	2	0	58
SL4.0ch05	43270575	MantaBND:128:21625:21630:1:0:0:0	SL4.0CH02	39023425	BND	A	A[SL4.0CH02:39023425[	2	0	58
SL4.0ch05	43773084	MantaBND:79517:0:1:0:0:0:0	SL4.0CH01	37927386	BND	T	T[SL4.0CH01:37927386[	1	0	59
SL4.0ch05	44273902	MantaBND:78154:2:5:0:0:0:1	SL4.0CH08	25741099	BND	T	]SL4.0CH08:25741099]T	1	1	58
SL4.0ch05	44311203	MantaBND:128:40561:40562:0:7:0:0	SL4.0CH10	21567694	BND	T	]SL4.0CH10:21567694]T	1	0	59
SL4.0ch05	44322937	MantaBND:128:11430:12183:0:0:0:0	SL4.0CH11	46358581	BND	A	]SL4.0CH11:46358581]A	1	0	59
SL4.0ch05	45228691	MantaBND:645494:0:1:0:0:0:1	SL4.0CH05	45524060	BND	T	T]SL4.0CH05:45524060]	1	0	59
SL4.0ch05	45524060	MantaBND:645494:0:1:0:0:0:0	SL4.0CH05	45228691	BND	A	A]SL4.0CH05:45228691]	1	0	59
SL4.0ch05	45958385	MantaBND:647342:0:0:5:0:0:1	SL4.0CH05	45958922	BND	A	[SL4.0CH05:45958922[A	1	0	59
SL4.0ch05	45958922	MantaBND:647342:0:0:5:0:0:0	SL4.0CH05	45958385	BND	A	[SL4.0CH05:45958385[A	1	0	59
SL4.0ch05	46733116	MantaBND:648411:0:1:0:2:0:0	SL4.0CH05	47953481	BND	A	[SL4.0CH05:47953481[A	1	0	59
SL4.0ch05	47058268	MantaBND:649332:0:1:3:1:0:1	SL4.0CH05	47059085	BND	T	T]SL4.0CH05:47059085]	1	0	59
SL4.0ch05	47059082	MantaBND:649332:0:1:3:1:0:0	SL4.0CH05	47058271	BND	T	T]SL4.0CH05:47058271]	1	0	59
SL4.0ch05	47597807	MantaBND:17186:0:1:0:0:0:0	SL4.0CH01	3490414	BND	G	G[SL4.0CH01:3490414[	2	0	58
SL4.0ch05	47953480	MantaBND:648411:0:1:0:2:0:1	SL4.0CH05	46733117	BND	T	[SL4.0CH05:46733117[T	1	0	59
SL4.0ch05	48548104	MantaBND:128:4140:12535:0:0:0:1	SL4.0CH08	25624278	BND	T	T[SL4.0CH08:25624278[	1	0	59
SL4.0ch05	50460423	MantaBND:655839:0:1:0:0:0:1	SL4.0CH07	48806940	BND	A	A[SL4.0CH07:48806940[	1	0	59
SL4.0ch05	50699278	MantaBND:656042:0:2:0:4:0:0	SL4.0CH05	50700860	BND	T	[SL4.0CH05:50700860[GATT	1	0	59
SL4.0ch05	50700860	MantaBND:656042:0:2:0:4:0:1	SL4.0CH05	50699278	BND	T	[SL4.0CH05:50699278[ATCT	1	0	59
SL4.0ch05	51025160	MantaBND:226221:0:1:0:0:0:1	SL4.0CH02	19666681	BND	C	C]SL4.0CH02:19666681]	1	0	59
SL4.0ch05	51130558	MantaBND:264162:2:3:0:0:0:1	SL4.0CH08	55819756	BND	A	A]SL4.0CH08:55819756]	0	0	60
SL4.0ch05	51431015	MantaBND:657762:0:1:0:0:0:1	SL4.0CH05	51436914	BND	T	T]SL4.0CH05:51436914]	1	0	59
SL4.0ch05	51436914	MantaBND:657762:0:1:0:0:0:0	SL4.0CH05	51431015	BND	T	T]SL4.0CH05:51431015]	1	0	59
SL4.0ch05	52623018	MantaBND:460565:1:4:0:0:0:0	SL4.0CH10	26354128	BND	T	[SL4.0CH10:26354128[T	1	0	59
SL4.0ch05	53059920	MantaBND:660023:0:1:0:0:0:1	SL4.0CH05	53060255	BND	C	[SL4.0CH05:53060255[GTAC	1	2	57
SL4.0ch05	53060255	MantaBND:660023:0:1:0:0:0:0	SL4.0CH05	53059920	BND	A	[SL4.0CH05:53059920[TACA	1	2	57
SL4.0ch05	53153725	MantaBND:128:21374:21378:0:0:0:1	SL4.0CH01	66113305	BND	C	[SL4.0CH01:66113305[C	1	0	59
SL4.0ch05	53845344	MantaBND:133697:0:1:1:0:0:0	SL4.0CH01	65920207	BND	A	]SL4.0CH01:65920207]ATTA	2	0	58
SL4.0ch05	53998701	MantaBND:128:39768:39777:0:0:0:0	SL4.0CH09	7187792	BND	G	G]SL4.0CH09:7187792]	1	0	59
SL4.0ch05	54847917	MantaBND:143:9859:9868:0:0:0:1	SL4.0CH04	43986533	BND	T	[SL4.0CH04:43986533[T	0	0	60
SL4.0ch05	54847918	MantaBND:162:13402:13437:0:0:0:1	SL4.0CH04	43986535	BND	C	[SL4.0CH04:43986535[C	0	0	60
SL4.0ch05	54847935	MantaBND:158715:1:6:0:0:0:1	SL4.0CH04	43986551	BND	T	[SL4.0CH04:43986551[T	0	0	60
SL4.0ch05	54847941	MantaBND:26:29625:29636:0:0:0:1	SL4.0CH04	43986558	BND	C	[SL4.0CH04:43986558[C	0	0	60
SL4.0ch05	54847945	MantaBND:32:7927:7934:0:0:0:1	SL4.0CH04	43986558	BND	T	[SL4.0CH04:43986558[T	0	0	60
SL4.0ch05	54939438	MantaBND:662962:0:1:0:0:0:1	SL4.0CH09	6608087	BND	C	C]SL4.0CH09:6608087]	1	0	59
SL4.0ch05	55072575	MantaBND:128:47577:47580:1:2:0:1	SL4.0CH05	55078366	BND	G	[SL4.0CH05:55078366[G	0	1	59
SL4.0ch05	55078366	MantaBND:128:47577:47580:1:2:0:0	SL4.0CH05	55072575	BND	G	[SL4.0CH05:55072575[G	0	1	59
SL4.0ch05	55288328	MantaBND:128:55272:55274:0:0:0:0	SL4.0CH08	2822657	BND	C	C]SL4.0CH08:2822657]	1	0	59
SL4.0ch05	55604409	MantaBND:663757:0:1:0:0:0:1	SL4.0CH05	55605125	BND	T	[SL4.0CH05:55605125[T	1	0	59
SL4.0ch05	55605125	MantaBND:663757:0:1:0:0:0:0	SL4.0CH05	55604409	BND	T	[SL4.0CH05:55604409[T	1	0	59
SL4.0ch05	55806611	MantaBND:14650:1:2:0:0:0:1	SL4.0CH01	69142089	BND	T	[SL4.0CH01:69142089[T	1	0	59
SL4.0ch05	56333034	MantaBND:135957:1:5:0:0:0:1	SL4.0CH09	7312140	BND	A	]SL4.0CH09:7312140]A	2	0	58
SL4.0ch05	57086417	MantaBND:666896:0:1:0:6:0:0	SL4.0CH12	24072932	BND	T	T]SL4.0CH12:24072932]	1	0	59
SL4.0ch05	57182146	MantaBND:315540:1:3:0:1:0:1	SL4.0CH05	57951911	BND	T	TGGACTAT]SL4.0CH05:57951911]	1	0	59
SL4.0ch05	57441686	MantaBND:128:2160:7050:0:0:0:0	SL4.0CH03	54145803	BND	T	[SL4.0CH03:54145803[T	1	0	59
SL4.0ch05	57811944	MantaBND:668132:0:1:0:0:0:1	SL4.0CH06	21270453	BND	T	]SL4.0CH06:21270453]T	1	0	59
SL4.0ch05	57951911	MantaBND:315540:1:3:0:1:0:0	SL4.0CH05	57182146	BND	T	TATAGTCC]SL4.0CH05:57182146]	1	0	59
SL4.0ch05	58135753	MantaBND:310933:0:1:0:0:0:0	SL4.0CH03	6974136	BND	A	]SL4.0CH03:6974136]A	1	0	59
SL4.0ch05	58206040	MantaBND:193743:1:2:0:0:0:0	SL4.0CH03	1878243	BND	T	[SL4.0CH03:1878243[T	1	0	59
SL4.0ch05	58376869	MantaBND:669218:0:0:8:0:0:0	SL4.0CH05	58377292	BND	T	[SL4.0CH05:58377292[T	1	0	59
SL4.0ch05	58377288	MantaBND:669218:0:0:8:0:0:1	SL4.0CH05	58376873	BND	A	[SL4.0CH05:58376873[A	1	0	59
SL4.0ch05	58377437	MantaBND:669218:0:1:1:0:0:0	SL4.0CH08	302251	BND	A	A]SL4.0CH08:302251]	1	0	59
SL4.0ch05	58552199	MantaBND:128:1978:12709:0:0:0:0	SL4.0CH12	6424275	BND	C	[SL4.0CH12:6424275[C	1	0	59
SL4.0ch05	58698113	MantaBND:669734:0:1:0:7:0:0	SL4.0CH05	58761125	BND	G	GGGG]SL4.0CH05:58761125]	1	2	57
SL4.0ch05	58761125	MantaBND:669734:0:1:0:7:0:1	SL4.0CH05	58698113	BND	A	ACCC]SL4.0CH05:58698113]	1	2	57
SL4.0ch05	59996311	MantaBND:128:36045:36047:0:7:0:0	SL4.0CH08	58539072	BND	T	]SL4.0CH08:58539072]T	2	0	58
SL4.0ch05	60412314	MantaBND:128:5307:6119:0:0:0:0	SL4.0CH03	31339413	BND	C	C[SL4.0CH03:31339413[	2	0	58
SL4.0ch05	60412368	MantaBND:128:5307:6119:1:0:0:1	SL4.0CH03	31339691	BND	C	]SL4.0CH03:31339691]C	2	0	58
SL4.0ch05	60473237	MantaBND:128:17501:17502:0:0:0:0	SL4.0CH07	10423286	BND	G	]SL4.0CH07:10423286]G	1	0	59
SL4.0ch05	60491008	MantaBND:424101:0:2:0:0:0:1	SL4.0CH03	64702208	BND	T	]SL4.0CH03:64702208]T	1	0	59
SL4.0ch05	60865184	MantaBND:673877:1:2:0:0:0:0	SL4.0CH08	54449012	BND	A	A]SL4.0CH08:54449012]	1	0	59
SL4.0ch05	60910290	MantaBND:273005:1:2:0:0:0:1	SL4.0CH09	45266575	BND	G	]SL4.0CH09:45266575]G	1	0	59
SL4.0ch05	61013542	MantaBND:63883:1:2:1:0:0:0	SL4.0CH01	61180282	BND	C	[SL4.0CH01:61180282[C	2	0	58
SL4.0ch05	61181419	MantaBND:128:4480:13167:0:0:0:1	SL4.0CH09	7331337	BND	T	]SL4.0CH09:7331337]T	0	1	59
SL4.0ch05	61181423	MantaBND:128:13165:13167:0:0:0:1	SL4.0CH09	7328012	BND	T	T[SL4.0CH09:7328012[	0	1	59
SL4.0ch05	61945948	MantaBND:128:6794:6795:0:0:0:1	SL4.0CH02	10859921	BND	T	]SL4.0CH02:10859921]T	1	0	59
SL4.0ch05	61948109	MantaBND:137037:4:7:0:0:0:1	SL4.0CH08	46736123	BND	C	[SL4.0CH08:46736123[C	1	0	59
SL4.0ch05	62207323	MantaBND:128:48864:48867:0:0:0:1	SL4.0CH11	50933582	BND	T	[SL4.0CH11:50933582[T	1	0	59
SL4.0ch05	62599141	MantaBND:128:8013:13220:0:0:0:0	SL4.0CH08	21998882	BND	T	TTA]SL4.0CH08:21998882]	0	1	59
SL4.0ch05	63231488	MantaBND:40813:0:1:0:0:0:0	SL4.0CH01	16374403	BND	A	]SL4.0CH01:16374403]TTTTTTTTTATA	1	0	59
SL4.0ch05	63339681	MantaBND:679613:0:1:0:0:0:1	SL4.0CH10	63348470	BND	T	]SL4.0CH10:63348470]T	1	0	59
SL4.0ch05	63369957	MantaBND:162:26208:26224:0:0:0:1	SL4.0CH03	3715529	BND	T	TTTG]SL4.0CH03:3715529]	0	0	60
SL4.0ch05	63418486	MantaBND:128:7841:7843:0:0:0:0	SL4.0CH01	68661968	BND	C	C[SL4.0CH01:68661968[	1	0	59
SL4.0ch05	63529806	MantaBND:128:25764:25765:0:0:0:1	SL4.0CH11	48410162	BND	C	C[SL4.0CH11:48410162[	1	0	59
SL4.0ch05	64303803	MantaBND:128:10450:13379:0:0:0:1	SL4.0CH10	216546	BND	T	]SL4.0CH10:216546]T	1	0	59
SL4.0ch05	64303854	MantaBND:128:10450:13381:1:6:0:1	SL4.0CH10	61915128	BND	C	[SL4.0CH10:61915128[C	1	0	59
SL4.0ch05	64303857	MantaBND:128:10450:13378:1:3:0:0	SL4.0CH10	46247051	BND	T	[SL4.0CH10:46247051[CGAT	1	0	59
SL4.0ch05	64304353	MantaBND:128:10450:13378:0:0:0:1	SL4.0CH10	46247066	BND	T	T]SL4.0CH10:46247066]	1	0	59
SL4.0ch05	64304365	MantaBND:128:10450:13381:0:0:0:0	SL4.0CH10	61915142	BND	A	A]SL4.0CH10:61915142]	1	0	59
SL4.0ch05	64337195	MantaBND:200808:0:1:0:0:0:0	SL4.0CH02	5897778	BND	T	T]SL4.0CH02:5897778]	1	0	59
SL4.0ch05	64408652	MantaBND:148912:0:1:0:0:0:1	SL4.0CH01	73363688	BND	T	[SL4.0CH01:73363688[T	1	0	59
SL4.0ch05	64534832	MantaBND:241662:0:2:0:1:0:1	SL4.0CH02	28330290	BND	T	]SL4.0CH02:28330290]T	1	0	59
SL4.0ch05	64535724	MantaBND:526910:1:2:0:6:0:1	SL4.0CH04	51081230	BND	G	]SL4.0CH04:51081230]ACCTTGTAACTTTCCTGCTCGCGAACTG	1	0	59
SL4.0ch05	64672968	MantaBND:682742:0:1:0:0:0:1	SL4.0CH05	64673729	BND	A	AAGCACTTAAA]SL4.0CH05:64673729]	0	1	59
SL4.0ch05	64673729	MantaBND:682742:0:1:0:0:0:0	SL4.0CH05	64672968	BND	A	ATTTAAGTGCT]SL4.0CH05:64672968]	0	1	59
SL4.0ch05	64973065	MantaBND:128:7234:13205:1:0:0:0	SL4.0CH07	4334859	BND	G	G[SL4.0CH07:4334859[	3	0	57
SL4.0ch05	64994020	MantaBND:60404:2:3:0:0:0:0	SL4.0CH12	58980458	BND	C	C[SL4.0CH12:58980458[	1	0	59
SL4.0ch06	30698	MantaBND:109422:0:1:0:0:0:0	SL4.0CH01	53075266	BND	G	G]SL4.0CH01:53075266]	0	1	59
SL4.0ch06	900608	MantaBND:143:9401:9411:1:4:0:0	SL4.0CH06	1030066	BND	A	AC]SL4.0CH06:1030066]	0	0	60
SL4.0ch06	1030066	MantaBND:143:9401:9411:1:4:0:1	SL4.0CH06	900608	BND	A	AG]SL4.0CH06:900608]	0	0	60
SL4.0ch06	1080087	MantaBND:128:11077:11078:0:0:0:0	SL4.0CH05	19346255	BND	A	[SL4.0CH05:19346255[A	1	0	59
SL4.0ch06	1177618	MantaBND:128:18969:18970:0:0:0:1	SL4.0CH06	1219281	BND	A	[SL4.0CH06:1219281[A	1	0	59
SL4.0ch06	1219281	MantaBND:128:18969:18970:0:0:0:0	SL4.0CH06	1177618	BND	T	[SL4.0CH06:1177618[T	1	0	59
SL4.0ch06	1319276	MantaBND:569357:0:1:0:0:0:0	SL4.0CH05	6617430	BND	G	[SL4.0CH05:6617430[G	1	0	59
SL4.0ch06	1674039	MantaBND:24313:2:3:0:0:0:1	SL4.0CH06	1677617	BND	A	[SL4.0CH06:1677617[TTTA	0	0	60
SL4.0ch06	1677617	MantaBND:24313:2:3:0:0:0:0	SL4.0CH06	1674039	BND	G	[SL4.0CH06:1674039[AAAG	0	0	60
SL4.0ch06	1738854	MantaBND:688467:0:1:0:0:0:0	SL4.0CH08	43870108	BND	A	AATG]SL4.0CH08:43870108]	1	0	59
SL4.0ch06	1943780	MantaBND:373960:3:4:0:0:0:0	SL4.0CH04	2614199	BND	T	T]SL4.0CH04:2614199]	1	0	59
SL4.0ch06	1943865	MantaBND:373960:3:4:1:0:0:0	SL4.0CH04	2613894	BND	T	[SL4.0CH04:2613894[T	1	0	59
SL4.0ch06	2270049	MantaBND:150904:0:1:0:0:0:1	SL4.0CH01	74336778	BND	A	A[SL4.0CH01:74336778[	1	0	59
SL4.0ch06	2270260	MantaBND:150904:0:1:1:1:0:0	SL4.0CH01	74337249	BND	T	]SL4.0CH01:74337249]AGT	1	0	59
SL4.0ch06	2518516	MantaBND:148912:14:15:1:0:0:1	SL4.0CH02	41375370	BND	T	[SL4.0CH02:41375370[T	2	0	58
SL4.0ch06	2518690	MantaBND:148912:15:19:0:1:0:1	SL4.0CH04	60008111	BND	A	]SL4.0CH04:60008111]A	1	0	59
SL4.0ch06	2518923	MantaBND:148912:14:15:0:0:0:0	SL4.0CH02	41375417	BND	G	G]SL4.0CH02:41375417]	2	0	58
SL4.0ch06	2518927	MantaBND:148912:11:15:0:0:0:1	SL4.0CH09	66607101	BND	A	ACTTGCGAC[SL4.0CH09:66607101[	1	0	59
SL4.0ch06	2757813	MantaBND:128:24628:24634:0:0:0:1	SL4.0CH01	89806859	BND	T	[SL4.0CH01:89806859[T	3	0	57
SL4.0ch06	2795966	MantaBND:128:13841:13842:1:0:0:0	SL4.0CH07	4862678	BND	A	A]SL4.0CH07:4862678]	2	0	58
SL4.0ch06	2796041	MantaBND:128:13841:13842:0:0:0:0	SL4.0CH07	4863117	BND	A	A]SL4.0CH07:4863117]	1	0	59
SL4.0ch06	2958957	MantaBND:128:14492:14494:0:0:0:1	SL4.0CH04	41047260	BND	A	A]SL4.0CH04:41047260]	1	0	59
SL4.0ch06	3067757	MantaBND:236980:2:3:0:0:0:0	SL4.0CH08	10470462	BND	T	T[SL4.0CH08:10470462[	0	0	60
SL4.0ch06	3067784	MantaBND:143:9380:9381:0:0:0:0	SL4.0CH08	10470462	BND	C	C[SL4.0CH08:10470462[	0	0	60
SL4.0ch06	3670799	MantaBND:32:5108:5109:0:0:0:0	SL4.0CH03	54145810	BND	T	[SL4.0CH03:54145810[T	0	0	60
SL4.0ch06	3707716	MantaBND:128:14135:14142:0:0:0:1	SL4.0CH01	79402296	BND	C	C]SL4.0CH01:79402296]	2	0	58
SL4.0ch06	3781002	MantaBND:29835:11:12:0:0:0:1	SL4.0CH12	50327555	BND	A	A[SL4.0CH12:50327555[	1	0	59
SL4.0ch06	3838857	MantaBND:128:44246:44255:0:9:0:1	SL4.0CH02	40955846	BND	T	T]SL4.0CH02:40955846]	3	0	57
SL4.0ch06	3869137	MantaBND:692914:0:1:0:1:0:0	SL4.0CH07	63878784	BND	T	[SL4.0CH07:63878784[T	1	0	59
SL4.0ch06	4140430	MantaBND:693454:0:0:9:9:0:0	SL4.0CH06	4140986	BND	G	GG]SL4.0CH06:4140986]	1	0	59
SL4.0ch06	4140738	MantaBND:693454:0:0:10:0:0:0	SL4.0CH06	4141072	BND	C	[SL4.0CH06:4141072[C	1	0	59
SL4.0ch06	4140986	MantaBND:693454:0:0:9:9:0:1	SL4.0CH06	4140430	BND	A	AC]SL4.0CH06:4140430]	1	0	59
SL4.0ch06	4141072	MantaBND:693454:0:0:10:0:0:1	SL4.0CH06	4140738	BND	C	[SL4.0CH06:4140738[C	1	0	59
SL4.0ch06	4369335	MantaBND:693827:0:1:1:2:0:1	SL4.0CH06	4393723	BND	C	[SL4.0CH06:4393723[C	1	0	59
SL4.0ch06	4393722	MantaBND:693827:0:1:1:2:0:0	SL4.0CH06	4369336	BND	G	[SL4.0CH06:4369336[G	1	0	59
SL4.0ch06	4764061	MantaBND:694579:0:1:0:0:0:1	SL4.0CH12	19151306	BND	A	]SL4.0CH12:19151306]A	1	0	59
SL4.0ch06	4842287	MantaBND:248032:0:1:0:0:0:0	SL4.0CH02	32390115	BND	C	C]SL4.0CH02:32390115]	1	0	59
SL4.0ch06	4930509	MantaBND:6400:0:1:0:1:0:0	SL4.0CH06	4931186	BND	T	TC]SL4.0CH06:4931186]	1	0	59
SL4.0ch06	4931186	MantaBND:6400:0:1:0:1:0:1	SL4.0CH06	4930509	BND	G	GG]SL4.0CH06:4930509]	1	0	59
SL4.0ch06	5000042	MantaBND:128:14924:14925:0:4:0:1	SL4.0CH04	46818360	BND	C	[SL4.0CH04:46818360[C	0	0	60
SL4.0ch06	5239943	MantaBND:123:7640:7643:0:0:0:0	SL4.0CH02	5467584	BND	C	C]SL4.0CH02:5467584]	0	0	60
SL4.0ch06	5356869	MantaBND:695784:0:1:0:0:0:1	SL4.0CH12	57671138	BND	C	]SL4.0CH12:57671138]C	2	0	58
SL4.0ch06	5671845	MantaBND:110939:5:6:0:0:0:0	SL4.0CH06	9530198	BND	G	G]SL4.0CH06:9530198]	1	0	59
SL4.0ch06	6933761	MantaBND:255201:1:3:0:0:0:0	SL4.0CH07	62446688	BND	A	A[SL4.0CH07:62446688[	0	0	60
SL4.0ch06	6998550	MantaBND:40705:24:25:0:0:0:1	SL4.0CH06	7081013	BND	T	[SL4.0CH06:7081013[T	1	0	59
SL4.0ch06	7076117	MantaBND:128:23098:23107:0:0:0:0	SL4.0CH06	7092940	BND	G	GAA]SL4.0CH06:7092940]	0	1	59
SL4.0ch06	7081013	MantaBND:40705:24:25:0:0:0:0	SL4.0CH06	6998550	BND	A	[SL4.0CH06:6998550[A	1	0	59
SL4.0ch06	7092940	MantaBND:128:23098:23107:0:0:0:1	SL4.0CH06	7076117	BND	C	CTT]SL4.0CH06:7076117]	0	1	59
SL4.0ch06	7259257	MantaBND:128:46518:46524:0:0:0:1	SL4.0CH05	5642380	BND	T	]SL4.0CH05:5642380]T	1	0	59
SL4.0ch06	7286616	MantaBND:162:20610:20626:0:5:0:0	SL4.0CH11	17014793	BND	G	[SL4.0CH11:17014793[AAGG	0	0	60
SL4.0ch06	7610230	MantaBND:162:25934:25944:0:2:0:0	SL4.0CH11	26943696	BND	T	[SL4.0CH11:26943696[T	0	0	60
SL4.0ch06	7675846	MantaBND:357832:1:2:0:0:0:1	SL4.0CH11	42295503	BND	T	T[SL4.0CH11:42295503[	1	0	59
SL4.0ch06	8065124	MantaBND:133380:0:5:0:0:0:1	SL4.0CH01	65738912	BND	T	[SL4.0CH01:65738912[T	0	1	59
SL4.0ch06	8529697	MantaBND:703309:0:1:0:1:0:0	SL4.0CH10	5317635	BND	C	C]SL4.0CH10:5317635]	1	0	59
SL4.0ch06	8532701	MantaBND:128:15311:15317:0:0:0:1	SL4.0CH03	24385833	BND	T	[SL4.0CH03:24385833[T	1	0	59
SL4.0ch06	8749433	MantaBND:128:1906:15374:0:0:0:0	SL4.0CH08	9939394	BND	T	]SL4.0CH08:9939394]T	1	0	59
SL4.0ch06	8773686	MantaBND:400278:0:2:0:4:0:0	SL4.0CH03	54079633	BND	C	C[SL4.0CH03:54079633[	2	0	58
SL4.0ch06	9530198	MantaBND:110939:5:6:0:0:0:1	SL4.0CH06	5671845	BND	A	A]SL4.0CH06:5671845]	1	0	59
SL4.0ch06	9546892	MantaBND:126324:2:3:1:0:0:0	SL4.0CH06	9559323	BND	A	[SL4.0CH06:9559323[A	1	0	59
SL4.0ch06	9546918	MantaBND:126324:2:5:0:1:0:1	SL4.0CH06	9562960	BND	A	A]SL4.0CH06:9562960]	0	1	59
SL4.0ch06	9547232	MantaBND:126324:2:3:0:0:0:0	SL4.0CH06	9559299	BND	T	T]SL4.0CH06:9559299]	1	0	59
SL4.0ch06	9559299	MantaBND:126324:2:3:0:0:0:1	SL4.0CH06	9547232	BND	A	A]SL4.0CH06:9547232]	1	0	59
SL4.0ch06	9559323	MantaBND:126324:2:3:1:0:0:1	SL4.0CH06	9546892	BND	A	[SL4.0CH06:9546892[A	1	0	59
SL4.0ch06	9562959	MantaBND:126324:2:5:0:1:0:0	SL4.0CH06	9546919	BND	T	T]SL4.0CH06:9546919]	0	1	59
SL4.0ch06	9764458	MantaBND:23299:0:1:0:8:0:0	SL4.0CH01	11965097	BND	C	]SL4.0CH01:11965097]C	0	0	60
SL4.0ch06	10942691	MantaBND:128:766:3755:0:0:0:0	SL4.0CH03	12475301	BND	C	C]SL4.0CH03:12475301]	1	0	59
SL4.0ch06	11211473	MantaBND:189440:0:2:0:1:0:1	SL4.0CH03	60528590	BND	T	[SL4.0CH03:60528590[T	0	0	60
SL4.0ch06	11248126	MantaBND:128:9896:15611:0:5:0:0	SL4.0CH10	61756892	BND	C	]SL4.0CH10:61756892]C	1	0	59
SL4.0ch06	11588099	MantaBND:708531:0:1:0:0:0:1	SL4.0CH12	37314638	BND	G	G[SL4.0CH12:37314638[	2	0	58
SL4.0ch06	11923750	MantaBND:128:30083:30086:0:0:0:0	SL4.0CH08	60048892	BND	C	C[SL4.0CH08:60048892[	1	0	59
SL4.0ch06	12129699	MantaBND:128:46436:46437:0:0:0:1	SL4.0CH06	12135891	BND	T	[SL4.0CH06:12135891[T	1	0	59
SL4.0ch06	12135891	MantaBND:128:46436:46437:0:0:0:0	SL4.0CH06	12129699	BND	C	[SL4.0CH06:12129699[C	1	0	59
SL4.0ch06	13383005	MantaBND:712724:0:1:0:0:0:0	SL4.0CH07	10897281	BND	G	G[SL4.0CH07:10897281[	1	0	59
SL4.0ch06	13458679	MantaBND:712896:0:3:0:0:0:1	SL4.0CH06	13459949	BND	T	T]SL4.0CH06:13459949]	1	0	59
SL4.0ch06	13459949	MantaBND:712896:0:3:0:0:0:0	SL4.0CH06	13458679	BND	A	A]SL4.0CH06:13458679]	1	0	59
SL4.0ch06	13618516	MantaBND:40795:2:3:0:1:0:1	SL4.0CH04	20644682	BND	C	C[SL4.0CH04:20644682[	1	0	59
SL4.0ch06	13706233	MantaBND:162145:1:2:0:0:0:0	SL4.0CH10	39950969	BND	T	]SL4.0CH10:39950969]T	0	0	60
SL4.0ch06	13706252	MantaBND:377597:0:1:0:0:0:0	SL4.0CH10	39950950	BND	A	]SL4.0CH10:39950950]A,]SL4.0CH10:39950959]A	0	0	60
SL4.0ch06	13706253	MantaBND:134360:1:2:0:0:0:0	SL4.0CH10	39950939	BND	T	]SL4.0CH10:39950939]T	0	0	60
SL4.0ch06	14485166	MantaBND:128:16183:16188:0:0:0:1	SL4.0CH08	21292049	BND	T	]SL4.0CH08:21292049]T	1	0	59
SL4.0ch06	14508359	MantaBND:379084:0:1:0:1:0:0	SL4.0CH12	28178987	BND	G	G[SL4.0CH12:28178987[	1	2	57
SL4.0ch06	14617363	MantaBND:5948:0:1:0:0:0:1	SL4.0CH00	7628352	BND	G	G]SL4.0CH00:7628352]	1	0	59
SL4.0ch06	14718055	MantaBND:378763:0:1:0:0:0:1	SL4.0CH06	14213434	BND	T	[SL4.0CH06:14213434[T	0	0	60
SL4.0ch06	14718107	MantaBND:715053:0:1:0:0:0:1	SL4.0CH06	14213434	BND	G	[SL4.0CH06:14213434[G	1	1	58
SL4.0ch06	14959281	MantaBND:128:3663:3664:0:0:0:1	SL4.0CH02	16525930	BND	C	]SL4.0CH02:16525930]C	1	0	59
SL4.0ch06	15875263	MantaBND:128:5692:6666:0:0:0:1	SL4.0CH01	26524931	BND	T	T[SL4.0CH01:26524931[	1	0	59
SL4.0ch06	16009368	MantaBND:717917:0:1:0:1:0:1	SL4.0CH06	16010251	BND	T	[SL4.0CH06:16010251[T	1	0	59
SL4.0ch06	16010251	MantaBND:717917:0:1:0:1:0:0	SL4.0CH06	16009368	BND	A	[SL4.0CH06:16009368[A	1	0	59
SL4.0ch06	16169736	MantaBND:26:3995:4045:0:0:0:1	SL4.0CH03	54145799	BND	A	A[SL4.0CH03:54145799[	0	0	60
SL4.0ch06	16253683	MantaBND:128:16344:16349:0:0:0:1	SL4.0CH02	22467897	BND	G	]SL4.0CH02:22467897]G	1	0	59
SL4.0ch06	16253746	MantaBND:128:16344:16345:0:0:0:1	SL4.0CH06	40560079	BND	G	[SL4.0CH06:40560079[G	3	0	57
SL4.0ch06	16829075	MantaBND:226156:0:3:0:0:0:1	SL4.0CH04	12328948	BND	A	A]SL4.0CH04:12328948]	0	0	60
SL4.0ch06	16829080	MantaBND:257451:0:1:0:0:0:1	SL4.0CH04	12328950	BND	T	T]SL4.0CH04:12328950]	0	0	60
SL4.0ch06	17254929	MantaBND:719977:0:1:0:0:0:1	SL4.0CH06	17261817	BND	T	T]SL4.0CH06:17261817]	1	0	59
SL4.0ch06	17254939	MantaBND:719977:0:2:0:0:0:1	SL4.0CH06	17261138	BND	A	[SL4.0CH06:17261138[TA	1	0	59
SL4.0ch06	17261138	MantaBND:719977:0:2:0:0:0:0	SL4.0CH06	17254939	BND	T	[SL4.0CH06:17254939[AT	1	0	59
SL4.0ch06	17261816	MantaBND:719977:0:1:0:0:0:0	SL4.0CH06	17254930	BND	T	T]SL4.0CH06:17254930]	1	0	59
SL4.0ch06	17371947	MantaBND:323634:1:1:11:2:0:1	SL4.0CH06	17372234	BND	G	G]SL4.0CH06:17372234]	1	0	59
SL4.0ch06	17372234	MantaBND:323634:1:1:11:2:0:0	SL4.0CH06	17371947	BND	A	A]SL4.0CH06:17371947]	1	0	59
SL4.0ch06	17403808	MantaBND:123:1565:3635:0:0:0:0	SL4.0CH03	54145816	BND	T	[SL4.0CH03:54145816[T	0	0	60
SL4.0ch06	17461845	MantaBND:105259:0:1:0:0:0:0	SL4.0CH01	51021277	BND	A	[SL4.0CH01:51021277[A	1	0	59
SL4.0ch06	17489313	MantaBND:128:26218:26221:0:0:0:0	SL4.0CH10	18366223	BND	A	]SL4.0CH10:18366223]A	1	0	59
SL4.0ch06	17831840	MantaBND:128:32676:32678:0:0:0:0	SL4.0CH06	17950339	BND	T	[SL4.0CH06:17950339[T	0	1	59
SL4.0ch06	17950339	MantaBND:128:32676:32678:0:0:0:1	SL4.0CH06	17831840	BND	A	[SL4.0CH06:17831840[A	0	1	59
SL4.0ch06	18395858	MantaBND:128:8029:8030:0:4:0:1	SL4.0CH04	9350610	BND	A	]SL4.0CH04:9350610]A	0	2	58
SL4.0ch06	18455109	MantaBND:722399:0:1:0:0:0:0	SL4.0CH10	19513840	BND	T	T[SL4.0CH10:19513840[	1	0	59
SL4.0ch06	18555392	MantaBND:128:17858:17864:0:0:0:0	SL4.0CH08	54803420	BND	T	T]SL4.0CH08:54803420]	2	0	58
SL4.0ch06	18872337	MantaBND:32:5108:5529:0:0:0:0	SL4.0CH03	54145770	BND	A	A[SL4.0CH03:54145770[	0	0	60
SL4.0ch06	18872337	MantaBND:123:1565:3626:0:0:0:0	SL4.0CH03	54145774	BND	A	A[SL4.0CH03:54145774[	0	0	60
SL4.0ch06	19211313	MantaBND:724078:0:1:0:0:0:0	SL4.0CH08	20078846	BND	T	T[SL4.0CH08:20078846[	1	0	59
SL4.0ch06	20287102	MantaBND:128:16090:16095:0:0:0:0	SL4.0CH07	24913926	BND	A	]SL4.0CH07:24913926]A	1	0	59
SL4.0ch06	20442762	MantaBND:609521:0:1:0:0:0:0	SL4.0CH05	27762844	BND	C	C[SL4.0CH05:27762844[	1	0	59
SL4.0ch06	20478832	MantaBND:98246:1:2:0:0:0:0	SL4.0CH06	20501143	BND	G	[SL4.0CH06:20501143[G	1	0	59
SL4.0ch06	20501143	MantaBND:98246:1:2:0:0:0:1	SL4.0CH06	20478832	BND	G	[SL4.0CH06:20478832[G	1	0	59
SL4.0ch06	20824462	MantaBND:128:33684:33685:0:0:0:0	SL4.0CH08	13745416	BND	T	[SL4.0CH08:13745416[T	1	0	59
SL4.0ch06	21037888	MantaBND:452214:2:4:0:4:0:0	SL4.0CH07	4320451	BND	A	]SL4.0CH07:4320451]A	1	0	59
SL4.0ch06	21222204	MantaBND:251691:0:1:0:0:0:1	SL4.0CH02	34320370	BND	A	]SL4.0CH02:34320370]A	1	0	59
SL4.0ch06	21270453	MantaBND:668132:0:1:0:0:0:0	SL4.0CH05	57811944	BND	C	C[SL4.0CH05:57811944[	1	0	59
SL4.0ch06	21304978	MantaBND:128:17718:17718:8:0:0:0	SL4.0CH06	21305485	BND	T	T]SL4.0CH06:21305485]	1	0	59
SL4.0ch06	21305485	MantaBND:128:17718:17718:8:0:0:1	SL4.0CH06	21304978	BND	A	A]SL4.0CH06:21304978]	1	0	59
SL4.0ch06	21699244	MantaBND:729139:0:1:0:2:0:0	SL4.0CH09	56714350	BND	A	A]SL4.0CH09:56714350]	0	0	60
SL4.0ch06	21966029	MantaBND:128:10503:10504:0:0:0:0	SL4.0CH04	52668497	BND	T	T[SL4.0CH04:52668497[	0	0	60
SL4.0ch06	22220108	MantaBND:128:27463:27465:0:0:0:1	SL4.0CH03	28419002	BND	G	G]SL4.0CH03:28419002]	1	0	59
SL4.0ch06	22252553	MantaBND:730304:0:1:0:1:0:1	SL4.0CH07	3167957	BND	A	]SL4.0CH07:3167957]A	1	0	59
SL4.0ch06	22314514	MantaBND:730416:0:0:7:1:0:0	SL4.0CH06	22314744	BND	T	[SL4.0CH06:22314744[T	0	1	59
SL4.0ch06	22425759	MantaBND:9943:23:24:0:2:0:0	SL4.0CH02	44218706	BND	A	[SL4.0CH02:44218706[A	0	0	60
SL4.0ch06	22433474	MantaBND:128:16993:16994:0:0:0:0	SL4.0CH06	22472877	BND	A	[SL4.0CH06:22472877[A	0	1	59
SL4.0ch06	22451175	MantaBND:162:915:926:0:0:0:0	SL4.0CH02	44942728	BND	T	T[SL4.0CH02:44942728[	0	0	60
SL4.0ch06	22472877	MantaBND:128:16993:16994:0:0:0:1	SL4.0CH06	22433474	BND	C	[SL4.0CH06:22433474[C	0	1	59
SL4.0ch06	22506956	MantaBND:730551:0:1:0:1:0:0	SL4.0CH07	4328826	BND	A	ACTA]SL4.0CH07:4328826]	1	0	59
SL4.0ch06	22704621	MantaBND:128:44256:44257:0:7:0:1	SL4.0CH07	2563204	BND	A	[SL4.0CH07:2563204[A	2	0	58
SL4.0ch06	23149488	MantaBND:128:21666:21670:0:0:0:0	SL4.0CH07	59283013	BND	C	[SL4.0CH07:59283013[C	1	0	59
SL4.0ch06	23149625	MantaBND:162:6849:13324:0:0:0:0	SL4.0CH07	59283801	BND	T	T]SL4.0CH07:59283801]	0	0	60
SL4.0ch06	23252662	MantaBND:14377:3:6:1:1:0:0	SL4.0CH08	21220359	BND	C	]SL4.0CH08:21220359]AAC	0	0	60
SL4.0ch06	23442038	MantaBND:128:31710:31711:0:2:0:0	SL4.0CH03	54197843	BND	C	[SL4.0CH03:54197843[C	1	0	59
SL4.0ch06	23506198	MantaBND:732355:0:1:0:1:0:0	SL4.0CH09	3393924	BND	T	T]SL4.0CH09:3393924]	1	0	59
SL4.0ch06	23871178	MantaBND:555217:0:1:0:0:0:0	SL4.0CH05	199194	BND	A	A[SL4.0CH05:199194[	1	0	59
SL4.0ch06	23967073	MantaBND:123:6890:6892:0:0:0:1	SL4.0CH06	23970879	BND	C	[SL4.0CH06:23970879[C	0	0	60
SL4.0ch06	23967792	MantaBND:128:4963:17099:0:0:0:1	SL4.0CH07	62894684	BND	T	T[SL4.0CH07:62894684[	1	0	59
SL4.0ch06	23970879	MantaBND:123:6890:6892:0:0:0:0	SL4.0CH06	23967073	BND	T	[SL4.0CH06:23967073[T	0	0	60
SL4.0ch06	23986723	MantaBND:128:43507:47746:0:0:0:1	SL4.0CH11	42353774	BND	G	[SL4.0CH11:42353774[G	2	0	58
SL4.0ch06	24330227	MantaBND:459643:0:1:0:0:0:0	SL4.0CH06	24338703	BND	G	G]SL4.0CH06:24338703]	0	0	60
SL4.0ch06	24338701	MantaBND:459643:0:1:0:0:0:1	SL4.0CH06	24330229	BND	T	T]SL4.0CH06:24330229]	0	0	60
SL4.0ch06	24346519	MantaBND:128:8786:8787:0:0:0:1	SL4.0CH01	38275672	BND	C	[SL4.0CH01:38275672[C	1	0	59
SL4.0ch06	24469966	MantaBND:733906:0:1:0:4:0:0	SL4.0CH06	24473587	BND	C	C]SL4.0CH06:24473587]	1	0	59
SL4.0ch06	24473587	MantaBND:733906:0:1:0:4:0:1	SL4.0CH06	24469966	BND	C	C]SL4.0CH06:24469966]	1	0	59
SL4.0ch06	25410355	MantaBND:46050:0:1:0:0:0:0	SL4.0CH01	28185413	BND	T	]SL4.0CH01:28185413]T	0	0	60
SL4.0ch06	25694541	MantaBND:128:3980:4957:0:0:0:1	SL4.0CH02	47505783	BND	A	A[SL4.0CH02:47505783[	1	0	59
SL4.0ch06	25853122	MantaBND:737287:0:0:7:0:0:1	SL4.0CH06	25853496	BND	G	[SL4.0CH06:25853496[G	1	0	59
SL4.0ch06	25853423	MantaBND:737287:0:0:4:0:0:1	SL4.0CH06	25853527	BND	T	T]SL4.0CH06:25853527]	1	0	59
SL4.0ch06	25853496	MantaBND:737287:0:0:7:0:0:0	SL4.0CH06	25853122	BND	T	[SL4.0CH06:25853122[T	1	0	59
SL4.0ch06	25853527	MantaBND:737287:0:0:4:0:0:0	SL4.0CH06	25853423	BND	C	C]SL4.0CH06:25853423]	1	0	59
SL4.0ch06	25917626	MantaBND:737525:0:1:0:4:0:0	SL4.0CH06	26519468	BND	T	TTT]SL4.0CH06:26519468]	0	1	59
SL4.0ch06	26120046	MantaBND:128:14368:14369:0:3:0:1	SL4.0CH04	31691160	BND	T	]SL4.0CH04:31691160]T	1	0	59
SL4.0ch06	26492590	MantaBND:380810:0:1:0:2:0:0	SL4.0CH03	43858280	BND	A	AC]SL4.0CH03:43858280]	0	1	59
SL4.0ch06	26519468	MantaBND:737525:0:1:0:4:0:1	SL4.0CH06	25917626	BND	T	TAA]SL4.0CH06:25917626]	0	1	59
SL4.0ch06	26668232	MantaBND:30832:3:4:0:0:0:1	SL4.0CH01	19794888	BND	T	T[SL4.0CH01:19794888[	1	0	59
SL4.0ch06	27330990	MantaBND:740583:0:1:0:0:0:0	SL4.0CH10	37917767	BND	T	]SL4.0CH10:37917767]TCT	1	0	59
SL4.0ch06	27333165	MantaBND:128:16320:17994:0:2:0:0	SL4.0CH07	20492159	BND	T	TTGGGTTACT]SL4.0CH07:20492159]	1	0	59
SL4.0ch06	27615185	MantaBND:402395:0:1:0:0:0:1	SL4.0CH07	1265506	BND	A	AACTA[SL4.0CH07:1265506[	0	0	60
SL4.0ch06	27615203	MantaBND:162:25115:25116:1:0:0:1	SL4.0CH07	1265791	BND	A	]SL4.0CH07:1265791]A	0	0	60
SL4.0ch06	27687385	MantaBND:68947:17:18:0:0:0:0	SL4.0CH03	32538997	BND	G	]SL4.0CH03:32538997]G	0	0	60
SL4.0ch06	28306434	MantaBND:294470:1:4:0:1:0:0	SL4.0CH08	26279582	BND	A	A]SL4.0CH08:26279582]	0	0	60
SL4.0ch06	28968463	MantaBND:218518:0:1:0:0:0:0	SL4.0CH02	15692082	BND	A	A]SL4.0CH02:15692082]	0	1	59
SL4.0ch06	29120171	MantaBND:743533:0:1:0:1:0:1	SL4.0CH11	42366600	BND	G	[SL4.0CH11:42366600[G	1	0	59
SL4.0ch06	29520657	MantaBND:128:2906:11044:0:0:0:0	SL4.0CH05	17145414	BND	A	[SL4.0CH05:17145414[A	0	1	59
SL4.0ch06	30550137	MantaBND:52854:14:17:0:0:0:0	SL4.0CH05	31854350	BND	A	]SL4.0CH05:31854350]A	1	0	59
SL4.0ch06	30597275	MantaBND:128:34303:34310:0:0:0:1	SL4.0CH10	690257	BND	G	G[SL4.0CH10:690257[	1	0	59
SL4.0ch06	31619298	MantaBND:105910:1:2:0:0:0:0	SL4.0CH02	35719472	BND	G	[SL4.0CH02:35719472[G	2	0	58
SL4.0ch06	31622396	MantaBND:128:49796:49797:0:0:0:0	SL4.0CH03	24715344	BND	C	C[SL4.0CH03:24715344[	1	0	59
SL4.0ch06	31914904	MantaBND:128:18371:18376:0:0:0:0	SL4.0CH02	53344896	BND	A	[SL4.0CH02:53344896[A	1	0	59
SL4.0ch06	32052461	MantaBND:128:47735:47736:0:0:0:1	SL4.0CH08	47992268	BND	A	]SL4.0CH08:47992268]A	0	1	59
SL4.0ch06	32154490	MantaBND:749494:0:1:0:0:0:0	SL4.0CH07	41791751	BND	G	G[SL4.0CH07:41791751[	1	0	59
SL4.0ch06	32203284	MantaBND:128:42855:42856:1:0:0:0	SL4.0CH01	79356192	BND	T	[SL4.0CH01:79356192[T	1	0	59
SL4.0ch06	32233506	MantaBND:128:20347:20356:0:0:0:1	SL4.0CH02	7436614	BND	A	A[SL4.0CH02:7436614[	0	0	60
SL4.0ch06	32266717	MantaBND:128:42215:42242:0:0:0:0	SL4.0CH03	51801803	BND	T	]SL4.0CH03:51801803]T	1	0	59
SL4.0ch06	32342396	MantaBND:116162:2:4:0:0:0:0	SL4.0CH08	19031466	BND	G	G]SL4.0CH08:19031466]	1	0	59
SL4.0ch06	32413628	MantaBND:128:12065:18017:0:0:0:0	SL4.0CH11	34277513	BND	G	G]SL4.0CH11:34277513]	1	0	59
SL4.0ch06	32696645	MantaBND:750472:0:2:0:0:0:1	SL4.0CH06	32710553	BND	C	[SL4.0CH06:32710553[C	0	1	59
SL4.0ch06	32710553	MantaBND:750472:0:2:0:0:0:0	SL4.0CH06	32696645	BND	G	[SL4.0CH06:32696645[G	0	1	59
SL4.0ch06	33912801	MantaBND:128:18649:18650:0:0:0:1	SL4.0CH02	47123768	BND	T	T]SL4.0CH02:47123768]	2	0	58
SL4.0ch06	33988371	MantaBND:452310:0:1:1:0:0:1	SL4.0CH09	67650735	BND	G	G[SL4.0CH09:67650735[	0	0	60
SL4.0ch06	34459165	MantaBND:256139:0:1:0:1:0:0	SL4.0CH02	36264627	BND	C	C[SL4.0CH02:36264627[	1	0	59
SL4.0ch06	34599590	MantaBND:29788:3:4:0:0:0:1	SL4.0CH07	59565606	BND	T	[SL4.0CH07:59565606[T	1	0	59
SL4.0ch06	34635606	MantaBND:128:30267:30271:0:0:0:0	SL4.0CH09	7017192	BND	C	]SL4.0CH09:7017192]C	1	0	59
SL4.0ch06	34697160	MantaBND:755001:0:1:0:0:0:0	SL4.0CH11	40569869	BND	C	[SL4.0CH11:40569869[C	1	0	59
SL4.0ch06	34866174	MantaBND:22115:0:1:0:1:0:1	SL4.0CH01	5850415	BND	T	[SL4.0CH01:5850415[T	1	0	59
SL4.0ch06	34901638	MantaBND:128:7925:18685:0:0:0:0	SL4.0CH07	54507528	BND	T	[SL4.0CH07:54507528[T	1	0	59
SL4.0ch06	35298884	MantaBND:128:27122:27124:0:0:0:0	SL4.0CH11	10786256	BND	A	[SL4.0CH11:10786256[A	1	0	59
SL4.0ch06	35299231	MantaBND:128:27121:27122:0:0:0:0	SL4.0CH07	792310	BND	T	TTAGTTGTCCCTAATTACTTGTCAATTTTG]SL4.0CH07:792310]	1	0	59
SL4.0ch06	35857638	MantaBND:757455:0:1:0:0:0:0	SL4.0CH10	64726424	BND	A	[SL4.0CH10:64726424[A	1	0	59
SL4.0ch06	36211657	MantaBND:128:36619:36632:0:0:0:0	SL4.0CH01	88898718	BND	C	C]SL4.0CH01:88898718]	1	0	59
SL4.0ch06	36212564	MantaBND:557592:2:3:0:0:0:1	SL4.0CH05	1255355	BND	A	]SL4.0CH05:1255355]A	1	0	59
SL4.0ch06	36233145	MantaBND:128:28514:28514:3:0:0:0	SL4.0CH06	36233205	BND	T	T]SL4.0CH06:36233205]	3	0	57
SL4.0ch06	36233205	MantaBND:128:28514:28514:3:0:0:1	SL4.0CH06	36233145	BND	T	T]SL4.0CH06:36233145]	3	0	57
SL4.0ch06	36390690	MantaBND:128:26103:26109:0:0:0:0	SL4.0CH10	17216633	BND	C	[SL4.0CH10:17216633[C	3	0	57
SL4.0ch06	36391075	MantaBND:128:26109:26115:0:0:0:0	SL4.0CH02	44957468	BND	G	]SL4.0CH02:44957468]G	1	0	59
SL4.0ch06	36391103	MantaBND:128:26107:26109:1:2:0:0	SL4.0CH02	9172400	BND	T	T[SL4.0CH02:9172400[	1	0	59
SL4.0ch06	36391274	MantaBND:128:23538:26109:0:3:0:0	SL4.0CH11	39678692	BND	A	A[SL4.0CH11:39678692[	1	0	59
SL4.0ch06	36391324	MantaBND:128:26109:26119:0:0:0:0	SL4.0CH08	60698749	BND	A	A[SL4.0CH08:60698749[	1	0	59
SL4.0ch06	36520232	MantaBND:540424:0:1:1:0:0:1	SL4.0CH04	58075282	BND	G	[SL4.0CH04:58075282[G	1	0	59
SL4.0ch06	36520258	MantaBND:540424:0:1:0:0:0:0	SL4.0CH04	58075571	BND	T	T]SL4.0CH04:58075571]	1	0	59
SL4.0ch06	36592642	MantaBND:128:49677:49701:0:4:0:0	SL4.0CH02	43176968	BND	A	AC[SL4.0CH02:43176968[	1	0	59
SL4.0ch06	36925571	MantaBND:510452:2:4:0:0:0:0	SL4.0CH11	49648336	BND	T	T[SL4.0CH11:49648336[	1	0	59
SL4.0ch06	36926124	MantaBND:760161:0:1:1:0:0:0	SL4.0CH11	47293533	BND	G	]SL4.0CH11:47293533]G	1	0	59
SL4.0ch06	36926476	MantaBND:760161:0:1:0:0:0:0	SL4.0CH11	47293375	BND	T	T[SL4.0CH11:47293375[	1	0	59
SL4.0ch06	36968797	MantaBND:222673:0:1:0:0:0:0	SL4.0CH02	17550626	BND	T	]SL4.0CH02:17550626]T	3	0	57
SL4.0ch06	37123467	MantaBND:760617:0:1:0:0:0:1	SL4.0CH06	37123891	BND	C	C]SL4.0CH06:37123891]	0	1	59
SL4.0ch06	37123885	MantaBND:760617:0:1:0:0:0:0	SL4.0CH06	37123473	BND	A	A]SL4.0CH06:37123473]	0	1	59
SL4.0ch06	37638341	MantaBND:52808:0:1:0:2:0:1	SL4.0CH01	24095433	BND	A	]SL4.0CH01:24095433]A	0	1	59
SL4.0ch06	37641581	MantaBND:52808:2:6:0:2:0:1	SL4.0CH07	65459615	BND	A	ATAG[SL4.0CH07:65459615[	1	0	59
SL4.0ch06	37641582	MantaBND:52808:0:2:0:1:0:1	SL4.0CH01	24095435	BND	G	G[SL4.0CH01:24095435[	1	0	59
SL4.0ch06	38035106	MantaBND:128:49632:49667:1:2:0:0	SL4.0CH11	30764097	BND	A	[SL4.0CH11:30764097[CAAA	0	0	60
SL4.0ch06	38230817	MantaBND:763388:0:0:6:0:0:1	SL4.0CH06	38231231	BND	A	[SL4.0CH06:38231231[A	1	0	59
SL4.0ch06	38230909	MantaBND:763388:0:0:5:0:0:1	SL4.0CH06	38231202	BND	A	A]SL4.0CH06:38231202]	1	0	59
SL4.0ch06	38231202	MantaBND:763388:0:0:5:0:0:0	SL4.0CH06	38230909	BND	G	G]SL4.0CH06:38230909]	1	0	59
SL4.0ch06	38231231	MantaBND:763388:0:0:6:0:0:0	SL4.0CH06	38230817	BND	T	[SL4.0CH06:38230817[T	1	0	59
SL4.0ch06	38360335	MantaBND:763711:0:1:0:0:0:0	SL4.0CH06	38459524	BND	A	A]SL4.0CH06:38459524]	1	0	59
SL4.0ch06	38459524	MantaBND:763711:0:1:0:0:0:1	SL4.0CH06	38360335	BND	G	G]SL4.0CH06:38360335]	1	0	59
SL4.0ch06	38703049	MantaBND:128:13313:13314:0:0:0:1	SL4.0CH03	59568852	BND	T	]SL4.0CH03:59568852]T	1	0	59
SL4.0ch06	38703107	MantaBND:128:13251:13313:0:0:0:1	SL4.0CH04	6527822	BND	A	]SL4.0CH04:6527822]TACTA	0	1	59
SL4.0ch06	38703107	MantaBND:128:13313:19252:0:0:0:0	SL4.0CH12	15508106	BND	A	]SL4.0CH12:15508106]CTA	0	1	59
SL4.0ch06	39035168	MantaBND:540010:5:9:0:0:0:1	SL4.0CH04	57980184	BND	T	T]SL4.0CH04:57980184]	2	0	58
SL4.0ch06	39108846	MantaBND:191732:3:6:0:0:0:1	SL4.0CH06	39158583	BND	C	C]SL4.0CH06:39158583]	1	0	59
SL4.0ch06	39149011	MantaBND:128:19095:19101:0:0:0:0	SL4.0CH05	37097497	BND	T	[SL4.0CH05:37097497[T	1	0	59
SL4.0ch06	39158583	MantaBND:191732:3:6:0:0:0:0	SL4.0CH06	39108846	BND	A	A]SL4.0CH06:39108846]	1	0	59
SL4.0ch06	39209476	MantaBND:146819:0:1:0:0:0:1	SL4.0CH01	72333784	BND	A	[SL4.0CH01:72333784[A	1	0	59
SL4.0ch06	39422553	MantaBND:128:10128:10130:0:0:0:1	SL4.0CH05	2027607	BND	T	[SL4.0CH05:2027607[T	1	0	59
SL4.0ch06	39441085	MantaBND:408881:0:1:0:3:0:0	SL4.0CH03	58104513	BND	T	[SL4.0CH03:58104513[T	1	0	59
SL4.0ch06	40033311	MantaBND:128:43010:43018:0:5:0:0	SL4.0CH10	57575038	BND	G	G[SL4.0CH10:57575038[	1	0	59
SL4.0ch06	40560029	MantaBND:128:16345:16348:0:0:0:0	SL4.0CH11	10787290	BND	G	[SL4.0CH11:10787290[G	1	2	57
SL4.0ch06	40560079	MantaBND:128:16344:16345:0:0:0:0	SL4.0CH06	16253746	BND	A	[SL4.0CH06:16253746[A	3	0	57
SL4.0ch06	40560375	MantaBND:128:16345:16358:0:0:0:1	SL4.0CH02	41180344	BND	C	C]SL4.0CH02:41180344]	1	0	59
SL4.0ch06	40560388	MantaBND:128:16345:16349:0:0:0:1	SL4.0CH02	22467938	BND	T	T]SL4.0CH02:22467938]	1	2	57
SL4.0ch06	40566974	MantaBND:128:16046:19413:0:1:0:0	SL4.0CH12	57409430	BND	A	]SL4.0CH12:57409430]GTCAA	1	0	59
SL4.0ch06	40857637	MantaBND:538451:0:2:0:3:0:0	SL4.0CH04	57314936	BND	T	TCA[SL4.0CH04:57314936[	2	0	58
SL4.0ch06	41097181	MantaBND:251380:2:3:0:0:0:0	SL4.0CH10	63096414	BND	G	]SL4.0CH10:63096414]GAATGATGAGACCGGCCTAACCTATG	0	1	59
SL4.0ch06	41097452	MantaBND:251380:1:6:0:1:0:1	SL4.0CH10	38980983	BND	A	A[SL4.0CH10:38980983[	1	0	59
SL4.0ch06	41109961	MantaBND:128:2015:18900:0:0:0:0	SL4.0CH12	15545736	BND	C	[SL4.0CH12:15545736[C	1	0	59
SL4.0ch06	41492894	MantaBND:258230:0:2:1:0:0:0	SL4.0CH02	37320533	BND	A	[SL4.0CH02:37320533[A	1	0	59
SL4.0ch06	41709206	MantaBND:545850:1:3:0:0:0:0	SL4.0CH08	19276459	BND	T	[SL4.0CH08:19276459[T	1	0	59
SL4.0ch06	42291153	MantaBND:163285:0:1:0:1:0:1	SL4.0CH01	79568103	BND	G	G]SL4.0CH01:79568103]	1	0	59
SL4.0ch06	42923162	MantaBND:289398:0:3:0:0:0:0	SL4.0CH02	50646650	BND	C	]SL4.0CH02:50646650]C	1	0	59
SL4.0ch06	43464782	MantaBND:775205:0:1:0:1:0:0	SL4.0CH06	43482850	BND	A	[SL4.0CH06:43482850[A	2	0	58
SL4.0ch06	43482846	MantaBND:775205:0:1:0:1:0:1	SL4.0CH06	43464786	BND	A	[SL4.0CH06:43464786[A	2	0	58
SL4.0ch06	44178990	MantaBND:128:2093:18920:0:0:0:0	SL4.0CH09	55586279	BND	C	[SL4.0CH09:55586279[C	1	0	59
SL4.0ch06	44552645	MantaBND:258144:0:1:0:0:0:0	SL4.0CH02	37276038	BND	T	T]SL4.0CH02:37276038]	1	0	59
SL4.0ch06	44768077	MantaBND:777885:0:2:0:0:0:1	SL4.0CH09	236712	BND	A	[SL4.0CH09:236712[A	1	0	59
SL4.0ch06	45337426	MantaBND:173682:0:1:0:0:0:0	SL4.0CH01	83961189	BND	A	A]SL4.0CH01:83961189]	1	0	59
SL4.0ch06	46165519	MantaBND:128:10560:10572:0:0:0:0	SL4.0CH12	34706567	BND	T	]SL4.0CH12:34706567]T	2	0	58
SL4.0ch06	46165847	MantaBND:128:10557:10560:0:0:0:0	SL4.0CH04	41790704	BND	A	A]SL4.0CH04:41790704]	2	0	58
SL4.0ch06	47019483	MantaBND:424366:1:4:0:1:0:0	SL4.0CH09	51469645	BND	C	C]SL4.0CH09:51469645]	1	0	59
SL4.0ch06	47119294	MantaBND:128:24108:24111:0:0:0:1	SL4.0CH03	10671726	BND	G	[SL4.0CH03:10671726[G	2	0	58
SL4.0ch06	47121396	MantaBND:128:24133:24134:0:2:0:1	SL4.0CH01	73130058	BND	A	AAC[SL4.0CH01:73130058[	1	0	59
SL4.0ch06	47121426	MantaBND:128:24111:24134:0:0:0:0	SL4.0CH03	10671572	BND	A	A]SL4.0CH03:10671572]	2	0	58
SL4.0ch06	47258347	MantaBND:555005:0:1:0:0:0:0	SL4.0CH04	64458667	BND	A	AAGAAG]SL4.0CH04:64458667]	1	1	58
SL4.0ch07	155973	MantaBND:128:19876:19877:0:9:0:0	SL4.0CH09	9249208	BND	C	CCTTGAAGTGTTGGTGGCC[SL4.0CH09:9249208[	2	0	58
SL4.0ch07	246912	MantaBND:783990:0:1:0:0:0:1	SL4.0CH08	63624102	BND	T	T]SL4.0CH08:63624102]	1	0	59
SL4.0ch07	404435	MantaBND:784464:0:1:0:0:0:1	SL4.0CH10	54936518	BND	A	]SL4.0CH10:54936518]A	1	0	59
SL4.0ch07	445585	MantaBND:784583:0:2:0:0:0:0	SL4.0CH09	65610486	BND	T	T]SL4.0CH09:65610486]	1	0	59
SL4.0ch07	791686	MantaBND:128:28791:28795:0:0:0:0	SL4.0CH11	805435	BND	T	]SL4.0CH11:805435]T	1	0	59
SL4.0ch07	792310	MantaBND:128:27121:27122:0:0:0:1	SL4.0CH06	35299231	BND	T	TCAAAATTGACAAGTAATTAGGGACAACTA]SL4.0CH06:35299231]	1	0	59
SL4.0ch07	948560	MantaBND:785758:0:1:0:2:0:0	SL4.0CH07	1068693	BND	G	G]SL4.0CH07:1068693]	2	0	58
SL4.0ch07	1068672	MantaBND:785758:0:1:0:2:0:1	SL4.0CH07	948581	BND	A	A]SL4.0CH07:948581]	2	0	58
SL4.0ch07	1265791	MantaBND:162:25115:25116:1:0:0:0	SL4.0CH06	27615203	BND	T	T[SL4.0CH06:27615203[	0	0	60
SL4.0ch07	1447897	MantaBND:512501:0:1:0:4:0:1	SL4.0CH11	482936	BND	T	]SL4.0CH11:482936]TATT	1	0	59
SL4.0ch07	1448500	MantaBND:128:1926:2630:0:0:0:1	SL4.0CH02	22371251	BND	C	C[SL4.0CH02:22371251[	1	0	59
SL4.0ch07	1448646	MantaBND:128:2630:7226:0:0:0:1	SL4.0CH03	48466364	BND	T	T]SL4.0CH03:48466364]	1	0	59
SL4.0ch07	1919416	MantaBND:443190:2:2:12:0:0:0	SL4.0CH07	1919765	BND	A	[SL4.0CH07:1919765[A	1	0	59
SL4.0ch07	1919765	MantaBND:443190:2:2:12:0:0:1	SL4.0CH07	1919416	BND	A	[SL4.0CH07:1919416[A	1	0	59
SL4.0ch07	2055107	MantaBND:788555:0:1:0:0:0:1	SL4.0CH07	5324077	BND	C	C]SL4.0CH07:5324077]	1	0	59
SL4.0ch07	2171734	MantaBND:533371:0:1:0:0:0:1	SL4.0CH04	54702337	BND	A	[SL4.0CH04:54702337[A	1	0	59
SL4.0ch07	2338967	MantaBND:128:39196:39281:0:0:0:0	SL4.0CH10	5749413	BND	T	[SL4.0CH10:5749413[T	1	0	59
SL4.0ch07	2563202	MantaBND:128:44256:44257:0:7:0:0	SL4.0CH06	22704623	BND	C	[SL4.0CH06:22704623[C	2	0	58
SL4.0ch07	3167957	MantaBND:730304:0:1:0:1:0:0	SL4.0CH06	22252553	BND	T	T[SL4.0CH06:22252553[	1	0	59
SL4.0ch07	4140975	MantaBND:128:25499:25501:0:0:0:0	SL4.0CH07	41181475	BND	A	[SL4.0CH07:41181475[A	1	0	59
SL4.0ch07	4320451	MantaBND:452214:2:4:0:4:0:1	SL4.0CH06	21037888	BND	A	A[SL4.0CH06:21037888[	1	0	59
SL4.0ch07	4328826	MantaBND:730551:0:1:0:1:0:1	SL4.0CH06	22506956	BND	A	ATAG]SL4.0CH06:22506956]	1	0	59
SL4.0ch07	4334859	MantaBND:128:7234:13205:1:0:0:1	SL4.0CH05	64973065	BND	C	]SL4.0CH05:64973065]C	3	0	57
SL4.0ch07	4410978	MantaBND:128:23684:23685:0:3:0:0	SL4.0CH02	37111364	BND	A	]SL4.0CH02:37111364]ATGGGATGTTTTTGCTCTTTCAGA	1	0	59
SL4.0ch07	4462621	MantaBND:793811:1:2:0:3:0:0	SL4.0CH08	44580697	BND	T	]SL4.0CH08:44580697]AAT	1	0	59
SL4.0ch07	4466600	MantaBND:793787:0:1:0:0:0:1	SL4.0CH07	4491016	BND	A	[SL4.0CH07:4491016[A	1	0	59
SL4.0ch07	4491016	MantaBND:793787:0:1:0:0:0:0	SL4.0CH07	4466600	BND	A	[SL4.0CH07:4466600[A	1	0	59
SL4.0ch07	4862678	MantaBND:128:13841:13842:1:0:0:1	SL4.0CH06	2795966	BND	C	C]SL4.0CH06:2795966]	2	0	58
SL4.0ch07	4863117	MantaBND:128:13841:13842:0:0:0:1	SL4.0CH06	2796041	BND	T	T]SL4.0CH06:2796041]	1	0	59
SL4.0ch07	4968831	MantaBND:794387:0:1:0:1:0:0	SL4.0CH07	4975229	BND	T	[SL4.0CH07:4975229[T	1	0	59
SL4.0ch07	4975228	MantaBND:794387:0:1:0:1:0:1	SL4.0CH07	4968832	BND	A	[SL4.0CH07:4968832[A	1	0	59
SL4.0ch07	5193287	MantaBND:118155:4:6:0:4:0:1	SL4.0CH07	57434066	BND	A	AGGA]SL4.0CH07:57434066]	1	0	59
SL4.0ch07	5324077	MantaBND:788555:0:1:0:0:0:0	SL4.0CH07	2055107	BND	A	A]SL4.0CH07:2055107]	1	0	59
SL4.0ch07	5397243	MantaBND:128:20517:20518:1:2:0:0	SL4.0CH07	5655514	BND	T	T]SL4.0CH07:5655514]	1	0	59
SL4.0ch07	5655508	MantaBND:128:20517:20518:1:2:0:1	SL4.0CH07	5397249	BND	T	T]SL4.0CH07:5397249]	1	0	59
SL4.0ch07	5691479	MantaBND:514893:2:2:13:1:0:1	SL4.0CH07	5692225	BND	T	T]SL4.0CH07:5692225]	1	0	59
SL4.0ch07	5691512	MantaBND:514893:2:2:15:3:0:1	SL4.0CH07	5692326	BND	A	[SL4.0CH07:5692326[CGA	1	0	59
SL4.0ch07	5692225	MantaBND:514893:2:2:13:1:0:0	SL4.0CH07	5691479	BND	T	T]SL4.0CH07:5691479]	1	0	59
SL4.0ch07	5692326	MantaBND:514893:2:2:15:3:0:0	SL4.0CH07	5691512	BND	G	[SL4.0CH07:5691512[CGG	1	0	59
SL4.0ch07	6737629	MantaBND:29608:1:3:1:0:0:0	SL4.0CH11	38888486	BND	A	A[SL4.0CH11:38888486[	0	0	60
SL4.0ch07	6737647	MantaBND:128:47495:47496:1:0:0:0	SL4.0CH11	38888468	BND	C	C[SL4.0CH11:38888468[	1	0	59
SL4.0ch07	7160939	MantaBND:128:48480:48481:0:7:0:1	SL4.0CH11	48101543	BND	A	]SL4.0CH11:48101543]GCATATTAAAAAAAATAAATA	1	0	59
SL4.0ch07	7160941	MantaBND:128:48479:48481:0:0:0:0	SL4.0CH11	48094533	BND	A	A[SL4.0CH11:48094533[	1	0	59
SL4.0ch07	7480106	MantaBND:798235:0:1:0:0:0:1	SL4.0CH09	6153866	BND	G	[SL4.0CH09:6153866[G	1	0	59
SL4.0ch07	7876075	MantaBND:47977:1:2:0:0:0:1	SL4.0CH12	37989714	BND	A	]SL4.0CH12:37989714]A	1	0	59
SL4.0ch07	8322775	MantaBND:303808:0:1:0:0:0:1	SL4.0CH03	3397426	BND	G	G[SL4.0CH03:3397426[	1	0	59
SL4.0ch07	9507765	MantaBND:801810:0:2:0:0:0:0	SL4.0CH10	61587891	BND	A	[SL4.0CH10:61587891[A	1	0	59
SL4.0ch07	9507783	MantaBND:801810:0:1:1:1:0:1	SL4.0CH10	61588308	BND	C	CG]SL4.0CH10:61588308]	1	0	59
SL4.0ch07	10001146	MantaBND:128812:1:1:6:0:0:1	SL4.0CH07	10001296	BND	A	[SL4.0CH07:10001296[A	1	0	59
SL4.0ch07	10001293	MantaBND:128812:1:1:6:0:0:0	SL4.0CH07	10001149	BND	T	[SL4.0CH07:10001149[T	1	0	59
SL4.0ch07	10423286	MantaBND:128:17501:17502:0:0:0:1	SL4.0CH05	60473237	BND	G	G[SL4.0CH05:60473237[	1	0	59
SL4.0ch07	10703874	MantaBND:40804:0:1:0:0:0:0	SL4.0CH01	16347854	BND	T	T[SL4.0CH01:16347854[	2	0	58
SL4.0ch07	10897281	MantaBND:712724:0:1:0:0:0:1	SL4.0CH06	13383005	BND	G	]SL4.0CH06:13383005]G	1	0	59
SL4.0ch07	12149986	MantaBND:201818:1:2:0:5:0:1	SL4.0CH02	6475861	BND	A	[SL4.0CH02:6475861[TGCA	1	0	59
SL4.0ch07	12188496	MantaBND:807186:0:1:0:1:0:0	SL4.0CH09	682717	BND	A	[SL4.0CH09:682717[CAAATA	1	0	59
SL4.0ch07	12502318	MantaBND:347237:0:2:0:0:0:0	SL4.0CH03	26586850	BND	C	C]SL4.0CH03:26586850]	1	0	59
SL4.0ch07	13060257	MantaBND:128:46648:46649:0:0:0:0	SL4.0CH11	30895578	BND	G	[SL4.0CH11:30895578[G	2	0	58
SL4.0ch07	13061344	MantaBND:808544:0:1:0:1:0:1	SL4.0CH07	13064195	BND	A	[SL4.0CH07:13064195[TGCCAAATATCACTTTGAAAAGTGATTTTTTGAAAAGTGA	1	0	59
SL4.0ch07	13064195	MantaBND:808544:0:1:0:1:0:0	SL4.0CH07	13061344	BND	G	[SL4.0CH07:13061344[CACTTTTCAAAAAATCACTTTTCAAAGTGATATTTGGCAG	1	0	59
SL4.0ch07	13889053	MantaBND:810505:0:1:0:0:0:0	SL4.0CH08	2871926	BND	T	T[SL4.0CH08:2871926[	1	0	59
SL4.0ch07	14305497	MantaBND:811169:0:1:1:6:0:1	SL4.0CH07	14319339	BND	A	[SL4.0CH07:14319339[GATTA	1	0	59
SL4.0ch07	14305556	MantaBND:811169:0:1:0:0:0:0	SL4.0CH07	14319277	BND	A	A]SL4.0CH07:14319277]	1	0	59
SL4.0ch07	14319277	MantaBND:811169:0:1:0:0:0:1	SL4.0CH07	14305556	BND	T	T]SL4.0CH07:14305556]	1	0	59
SL4.0ch07	14319339	MantaBND:811169:0:1:1:6:0:0	SL4.0CH07	14305497	BND	C	[SL4.0CH07:14305497[AATCC	1	0	59
SL4.0ch07	14597676	MantaBND:811866:0:1:0:0:0:1	SL4.0CH10	22050363	BND	A	A[SL4.0CH10:22050363[	1	0	59
SL4.0ch07	14904453	MantaBND:128:6311:6374:1:0:0:0	SL4.0CH01	26517238	BND	T	T]SL4.0CH01:26517238]	1	0	59
SL4.0ch07	16482323	MantaBND:166267:0:1:0:0:0:1	SL4.0CH01	80924928	BND	T	T[SL4.0CH01:80924928[	1	0	59
SL4.0ch07	16899988	MantaBND:128:7426:21300:0:1:0:1	SL4.0CH12	33431509	BND	A	]SL4.0CH12:33431509]A	1	0	59
SL4.0ch07	17082191	MantaBND:117752:0:2:0:2:0:1	SL4.0CH01	57248318	BND	C	C[SL4.0CH01:57248318[	1	0	59
SL4.0ch07	18687433	MantaBND:818869:0:1:0:0:0:0	SL4.0CH07	20257461	BND	A	A]SL4.0CH07:20257461]	1	0	59
SL4.0ch07	20257461	MantaBND:818869:0:1:0:0:0:1	SL4.0CH07	18687433	BND	A	A]SL4.0CH07:18687433]	1	0	59
SL4.0ch07	20492159	MantaBND:128:16320:17994:0:2:0:1	SL4.0CH06	27333165	BND	A	AAGTAACCCA]SL4.0CH06:27333165]	1	0	59
SL4.0ch07	21276689	MantaBND:824054:0:1:0:0:0:0	SL4.0CH07	32947663	BND	G	[SL4.0CH07:32947663[G	1	0	59
SL4.0ch07	23043398	MantaBND:827258:0:1:0:0:0:0	SL4.0CH10	45326095	BND	A	]SL4.0CH10:45326095]A	2	0	58
SL4.0ch07	23549529	MantaBND:828218:0:1:1:1:0:0	SL4.0CH07	23550602	BND	T	[SL4.0CH07:23550602[T	1	0	59
SL4.0ch07	23549555	MantaBND:828218:0:1:0:0:0:0	SL4.0CH07	23550364	BND	C	C]SL4.0CH07:23550364]	1	0	59
SL4.0ch07	23550359	MantaBND:828218:0:1:0:0:0:1	SL4.0CH07	23549560	BND	C	C]SL4.0CH07:23549560]	1	0	59
SL4.0ch07	23550597	MantaBND:828218:0:1:1:1:0:1	SL4.0CH07	23549534	BND	A	[SL4.0CH07:23549534[A	1	0	59
SL4.0ch07	23826546	MantaBND:828675:0:1:0:0:0:0	SL4.0CH08	9211083	BND	A	A[SL4.0CH08:9211083[	1	0	59
SL4.0ch07	24673574	MantaBND:111547:3:4:0:5:0:1	SL4.0CH07	24717618	BND	A	[SL4.0CH07:24717618[A	1	0	59
SL4.0ch07	24717617	MantaBND:111547:3:4:0:5:0:0	SL4.0CH07	24673575	BND	T	[SL4.0CH07:24673575[T	1	0	59
SL4.0ch07	24726326	MantaBND:830291:0:1:0:2:0:0	SL4.0CH07	24794197	BND	T	[SL4.0CH07:24794197[T	0	2	58
SL4.0ch07	24794195	MantaBND:830291:0:1:0:2:0:1	SL4.0CH07	24726328	BND	C	[SL4.0CH07:24726328[C	0	2	58
SL4.0ch07	24913926	MantaBND:128:16090:16095:0:0:0:1	SL4.0CH06	20287102	BND	C	C[SL4.0CH06:20287102[	1	0	59
SL4.0ch07	27508936	MantaBND:128:12105:22076:0:1:0:1	SL4.0CH11	11882529	BND	T	T[SL4.0CH11:11882529[	1	0	59
SL4.0ch07	27726327	MantaBND:442413:0:1:0:0:0:1	SL4.0CH04	8373432	BND	T	]SL4.0CH04:8373432]T	0	1	59
SL4.0ch07	28020604	MantaBND:128:3427:3439:0:0:0:1	SL4.0CH12	19695602	BND	G	[SL4.0CH12:19695602[G	1	0	59
SL4.0ch07	28026443	MantaBND:128:5962:22110:0:0:0:0	SL4.0CH12	47024654	BND	G	G]SL4.0CH12:47024654]	1	0	59
SL4.0ch07	28192157	MantaBND:836723:0:1:0:3:0:1	SL4.0CH07	28194289	BND	A	[SL4.0CH07:28194289[TA	1	0	59
SL4.0ch07	28194289	MantaBND:836723:0:1:0:3:0:0	SL4.0CH07	28192157	BND	T	[SL4.0CH07:28192157[AT	1	0	59
SL4.0ch07	28245017	MantaBND:836873:0:1:0:2:0:0	SL4.0CH07	28247160	BND	T	T]SL4.0CH07:28247160]	1	0	59
SL4.0ch07	28247159	MantaBND:836873:0:1:0:2:0:1	SL4.0CH07	28245018	BND	C	C]SL4.0CH07:28245018]	1	0	59
SL4.0ch07	28630159	MantaBND:809363:1:2:0:0:0:0	SL4.0CH11	38854492	BND	A	A[SL4.0CH11:38854492[	1	0	59
SL4.0ch07	30735377	MantaBND:841691:0:1:0:1:0:0	SL4.0CH07	30735632	BND	A	[SL4.0CH07:30735632[AA	1	0	59
SL4.0ch07	30735632	MantaBND:841691:0:1:0:1:0:1	SL4.0CH07	30735377	BND	T	[SL4.0CH07:30735377[TT	1	0	59
SL4.0ch07	32176364	MantaBND:26:27855:27857:0:0:0:1	SL4.0CH12	41396342	BND	C	[SL4.0CH12:41396342[C	0	0	60
SL4.0ch07	32947663	MantaBND:824054:0:1:0:0:0:1	SL4.0CH07	21276689	BND	A	[SL4.0CH07:21276689[A	1	0	59
SL4.0ch07	33146180	MantaBND:330466:0:2:0:0:0:0	SL4.0CH03	18265889	BND	A	A]SL4.0CH03:18265889]	1	0	59
SL4.0ch07	33296943	MantaBND:229418:2:3:0:0:0:1	SL4.0CH11	37005272	BND	T	T]SL4.0CH11:37005272]	1	0	59
SL4.0ch07	34899855	MantaBND:128:19705:19711:0:0:0:0	SL4.0CH04	61019410	BND	T	T[SL4.0CH04:61019410[	2	0	58
SL4.0ch07	35086982	MantaBND:148097:3:5:0:0:0:0	SL4.0CH03	34000955	BND	G	G]SL4.0CH03:34000955]	1	0	59
SL4.0ch07	35721261	MantaBND:852005:0:1:0:0:0:0	SL4.0CH07	35754781	BND	C	[SL4.0CH07:35754781[GAAGTCC	0	1	59
SL4.0ch07	35754781	MantaBND:852005:0:1:0:0:0:1	SL4.0CH07	35721261	BND	T	[SL4.0CH07:35721261[GACTTCT	0	1	59
SL4.0ch07	36916204	MantaBND:854412:0:1:1:0:0:0	SL4.0CH07	36916713	BND	A	[SL4.0CH07:36916713[A	1	0	59
SL4.0ch07	36916712	MantaBND:854412:0:1:1:0:0:1	SL4.0CH07	36916205	BND	T	[SL4.0CH07:36916205[T	1	0	59
SL4.0ch07	37265721	MantaBND:855368:0:1:0:0:0:1	SL4.0CH07	37266660	BND	T	T]SL4.0CH07:37266660]	0	3	57
SL4.0ch07	37266657	MantaBND:855368:0:1:0:0:0:0	SL4.0CH07	37265724	BND	A	A]SL4.0CH07:37265724]	0	3	57
SL4.0ch07	37482356	MantaBND:668310:2:3:0:0:0:1	SL4.0CH07	37498793	BND	A	A]SL4.0CH07:37498793]	1	0	59
SL4.0ch07	37482573	MantaBND:668310:2:5:0:0:0:1	SL4.0CH07	37487337	BND	T	[SL4.0CH07:37487337[T	1	0	59
SL4.0ch07	37487337	MantaBND:668310:2:5:0:0:0:0	SL4.0CH07	37482573	BND	G	[SL4.0CH07:37482573[G	1	0	59
SL4.0ch07	37498793	MantaBND:668310:2:3:0:0:0:0	SL4.0CH07	37482356	BND	T	T]SL4.0CH07:37482356]	1	0	59
SL4.0ch07	38199848	MantaBND:857510:0:1:1:0:0:0	SL4.0CH12	61655981	BND	C	C[SL4.0CH12:61655981[	1	0	59
SL4.0ch07	38500698	MantaBND:26:15333:15334:0:0:0:0	SL4.0CH08	22005946	BND	A	A[SL4.0CH08:22005946[	0	0	60
SL4.0ch07	39079074	MantaBND:859128:0:1:0:1:0:0	SL4.0CH07	39313136	BND	A	[SL4.0CH07:39313136[A	1	0	59
SL4.0ch07	39313136	MantaBND:859128:0:1:0:1:0:1	SL4.0CH07	39079074	BND	G	[SL4.0CH07:39079074[G	1	0	59
SL4.0ch07	40918851	MantaBND:128:10862:22600:0:0:0:1	SL4.0CH12	18657594	BND	C	C[SL4.0CH12:18657594[	1	0	59
SL4.0ch07	41106829	MantaBND:522751:1:2:0:0:0:0	SL4.0CH08	25174241	BND	A	[SL4.0CH08:25174241[A	0	1	59
SL4.0ch07	41181475	MantaBND:128:25499:25501:0:0:0:1	SL4.0CH07	4140975	BND	G	[SL4.0CH07:4140975[G	1	0	59
SL4.0ch07	41791751	MantaBND:749494:0:1:0:0:0:1	SL4.0CH06	32154490	BND	A	]SL4.0CH06:32154490]A	1	0	59
SL4.0ch07	43159223	MantaBND:128:10632:22677:0:3:0:1	SL4.0CH09	15098264	BND	A	AGTGAGTACCAAAGC[SL4.0CH09:15098264[	1	1	58
SL4.0ch07	44253723	MantaBND:128:1929:2644:0:0:0:1	SL4.0CH01	52315778	BND	A	]SL4.0CH01:52315778]A	2	0	58
SL4.0ch07	44520765	MantaBND:47284:1:2:0:0:0:0	SL4.0CH09	18399003	BND	A	A[SL4.0CH09:18399003[	1	0	59
SL4.0ch07	44737052	MantaBND:869040:0:1:0:0:0:0	SL4.0CH07	44737590	BND	A	[SL4.0CH07:44737590[A	1	0	59
SL4.0ch07	44737590	MantaBND:869040:0:1:0:0:0:1	SL4.0CH07	44737052	BND	A	[SL4.0CH07:44737052[A	1	0	59
SL4.0ch07	44853430	MantaBND:360176:8:12:0:0:0:1	SL4.0CH12	44651350	BND	A	]SL4.0CH12:44651350]A	1	0	59
SL4.0ch07	45286227	MantaBND:128:30165:30167:0:0:0:1	SL4.0CH03	46209856	BND	A	A[SL4.0CH03:46209856[	1	0	59
SL4.0ch07	47224305	MantaBND:128:37802:37803:0:0:0:0	SL4.0CH04	2765855	BND	A	]SL4.0CH04:2765855]A	1	0	59
SL4.0ch07	47750439	MantaBND:128:22917:22918:0:0:0:0	SL4.0CH07	50090753	BND	T	TGGTCGTGACAATATGAT]SL4.0CH07:50090753]	1	0	59
SL4.0ch07	48806940	MantaBND:655839:0:1:0:0:0:0	SL4.0CH05	50460423	BND	G	]SL4.0CH05:50460423]G	1	0	59
SL4.0ch07	49218756	MantaBND:506473:0:1:0:0:0:0	SL4.0CH04	39927863	BND	T	T[SL4.0CH04:39927863[	1	0	59
SL4.0ch07	49363345	MantaBND:501528:1:3:2:0:0:0	SL4.0CH07	50689740	BND	A	[SL4.0CH07:50689740[A	1	0	59
SL4.0ch07	50090753	MantaBND:128:22917:22918:0:0:0:1	SL4.0CH07	47750439	BND	A	AATCATATTGTCACGACC]SL4.0CH07:47750439]	1	0	59
SL4.0ch07	50689740	MantaBND:501528:1:3:2:0:0:1	SL4.0CH07	49363345	BND	T	[SL4.0CH07:49363345[T	1	0	59
SL4.0ch07	50743610	MantaBND:880294:0:1:0:0:0:0	SL4.0CH07	50764579	BND	C	[SL4.0CH07:50764579[C	0	1	59
SL4.0ch07	50764579	MantaBND:880294:0:1:0:0:0:1	SL4.0CH07	50743610	BND	A	[SL4.0CH07:50743610[A	0	1	59
SL4.0ch07	50842279	MantaBND:11094:0:1:0:0:0:1	SL4.0CH01	1070763	BND	C	[SL4.0CH01:1070763[C	1	0	59
SL4.0ch07	50842668	MantaBND:11094:0:1:1:0:0:1	SL4.0CH01	1071036	BND	T	T]SL4.0CH01:1071036]	1	0	59
SL4.0ch07	51674355	MantaBND:128:23054:23055:0:0:0:0	SL4.0CH07	52690690	BND	T	[SL4.0CH07:52690690[T	1	0	59
SL4.0ch07	52066903	MantaBND:882835:0:1:0:1:0:0	SL4.0CH07	52072494	BND	A	A]SL4.0CH07:52072494]	1	0	59
SL4.0ch07	52072494	MantaBND:882835:0:1:0:1:0:1	SL4.0CH07	52066903	BND	A	A]SL4.0CH07:52066903]	1	0	59
SL4.0ch07	52690690	MantaBND:128:23054:23055:0:0:0:1	SL4.0CH07	51674355	BND	A	[SL4.0CH07:51674355[A	1	0	59
SL4.0ch07	52937398	MantaBND:884732:1:2:0:5:0:1	SL4.0CH07	52937975	BND	T	[SL4.0CH07:52937975[T	1	0	59
SL4.0ch07	52937972	MantaBND:884732:1:2:0:5:0:0	SL4.0CH07	52937401	BND	T	[SL4.0CH07:52937401[T	1	0	59
SL4.0ch07	53241259	MantaBND:875751:2:4:0:0:0:0	SL4.0CH12	37967060	BND	A	[SL4.0CH12:37967060[A	2	0	58
SL4.0ch07	53669507	MantaBND:12575:0:1:0:0:0:1	SL4.0CH01	1756579	BND	C	C[SL4.0CH01:1756579[	1	0	59
SL4.0ch07	53705498	MantaBND:128:1953:6813:0:0:0:1	SL4.0CH12	41966239	BND	A	A[SL4.0CH12:41966239[	2	0	58
SL4.0ch07	53982939	MantaBND:128:48166:48197:0:1:0:1	SL4.0CH04	21013113	BND	A	[SL4.0CH04:21013113[A	1	0	59
SL4.0ch07	54456726	MantaBND:247987:0:1:0:0:0:0	SL4.0CH02	32391978	BND	A	A]SL4.0CH02:32391978]	1	0	59
SL4.0ch07	54507528	MantaBND:128:7925:18685:0:0:0:1	SL4.0CH06	34901638	BND	T	[SL4.0CH06:34901638[T	1	0	59
SL4.0ch07	54534840	MantaBND:887885:0:1:0:0:0:0	SL4.0CH11	4544249	BND	T	T]SL4.0CH11:4544249]	1	0	59
SL4.0ch07	54685307	MantaBND:128:52888:52890:0:0:0:0	SL4.0CH12	268898	BND	G	[SL4.0CH12:268898[G	1	0	59
SL4.0ch07	54813599	MantaBND:764296:1:1:3:1:0:0	SL4.0CH07	54813940	BND	A	[SL4.0CH07:54813940[A	0	1	59
SL4.0ch07	54813930	MantaBND:764296:1:1:3:1:0:1	SL4.0CH07	54813609	BND	T	[SL4.0CH07:54813609[T	0	1	59
SL4.0ch07	55008919	MantaBND:128:6419:44586:0:0:0:0	SL4.0CH11	7802565	BND	C	]SL4.0CH11:7802565]C	1	0	59
SL4.0ch07	55233744	MantaBND:152157:0:1:0:0:0:0	SL4.0CH01	74793973	BND	T	T]SL4.0CH01:74793973]	1	0	59
SL4.0ch07	55631489	MantaBND:128:27453:27484:0:0:0:1	SL4.0CH11	7225224	BND	T	T[SL4.0CH11:7225224[	1	0	59
SL4.0ch07	56065622	MantaBND:890392:0:1:0:0:0:0	SL4.0CH07	58261736	BND	A	[SL4.0CH07:58261736[A	2	0	58
SL4.0ch07	56085826	MantaBND:890465:1:2:0:0:0:1	SL4.0CH07	58275044	BND	T	[SL4.0CH07:58275044[AAATATACGT	1	0	59
SL4.0ch07	56761073	MantaBND:18919:32:33:0:0:0:1	SL4.0CH10	57609711	BND	C	C[SL4.0CH10:57609711[	1	0	59
[truncated: 44,229 more rows]

## Sheet: Supplementary Table 4
Supplementary Table 4a: Number of monomorphic and polymorphic genetic variants (SNPs and short InDels) present in the collection of 57 cultivated tomatoes
[truncated: 27 more rows]
